# Supplementary material for: Evaluating Stacked Methylation Markers for Blood-Based Multicancer Detection
Source: MDPI journal article supplement (doi:10.3390/cancers15194826), 2023-10-01
Supplement: s1 [file s1]

**Table S4. Logistic regression coefficients from analysis of tumor vs blood samples (10% ctDNA)**

| Dilution | Biomarker combination | Intercept | Covariate |       |        |
|----------|-----------------------|-----------|-----------|-------|--------|
|          |                       |           | GALR1     | TLX1  | ZNF154 |
| 0.1      | G                     | -1.66     | 10.83     |       |        |
| 0.1      | T                     | -4.12     |           | 43.64 |        |
| 0.1      | Z                     | -2.82     |           |       | 43.81  |
| 0.1      | G + T                 | -4.18     | 0.77      | 43.03 |        |
| 0.1      | G + Z                 | -2.95     | 1.31      |       | 42.66  |
| 0.1      | T + Z                 | -4.86     |           | 32.42 | 28.17  |
| 0.1      | G + T + Z             | -4.61     | -3.88     | 34.53 | 30.58  |
