# Supplementary material for: Evaluating Stacked Methylation Markers for Blood-Based Multicancer Detection
Source: MDPI journal article supplement (doi:10.3390/cancers15194826), 2023-10-01
Supplement: s1 [file s1]

**Table S8. Performance of the three-marker combination (*GALR1*, *TLX1*, and *ZNF154*) in classifying TCGA tumors using cross validation (training cohorts)**

| Type <sup>a</sup> | Tumor samples | Normal samples | Threshold <sup>b</sup> |      | Sensitivity       |      | Specificity       |      | AUC               |       |
|-------------------|---------------|----------------|------------------------|------|-------------------|------|-------------------|------|-------------------|-------|
|                   |               |                | Mean <sup>c</sup>      | SD   | Mean <sup>c</sup> | SD   | Mean <sup>c</sup> | SD   | Mean <sup>c</sup> | SD    |
| BLCA              | 101           | 10             | 0.89                   | 0.08 | 91.3%             | 3.3  | 98.0%             | 4.5  | 0.978             | 0.009 |
| BRCA              | 338           | 48             | 0.84                   | 0.10 | 91.6%             | 2.9  | 95.8%             | 2.1  | 0.979             | 0.006 |
| COAD              | 137           | 19             | 0.80                   | 0.06 | 96.8%             | 0.8  | 100.0%            | 0.0  | 0.990             | 0.005 |
| HNSC              | 213           | 25             | 0.59                   | 0.13 | 99.7%             | 0.4  | 99.2%             | 1.8  | 0.998             | 0.002 |
| KIRC              | 148           | 80             | 0.52                   | 0.06 | 85.1%             | 3.4  | 93.5%             | 1.9  | 0.930             | 0.013 |
| KIRP              | 78            | 23             | 0.71                   | 0.11 | 75.9%             | 10.5 | 87.9%             | 10.8 | 0.870             | 0.016 |
| LIHC              | 76            | 25             | 0.43                   | 0.09 | 91.6%             | 2.7  | 96.8%             | 1.8  | 0.942             | 0.018 |
| LUAD              | 219           | 16             | 0.63                   | 0.18 | 99.5%             | 0.7  | 100.0%            | 0.0  | 1.000             | 0.001 |
| LUSC              | 180           | 21             | 0.56                   | 0.06 | 99.4%             | 0.4  | 99.0%             | 2.1  | 0.992             | 0.011 |
| PAAD*             | 33            | 5              | 0.56                   | 0.09 | 98.8%             | 1.6  | 100.0%            | 0.0  | 0.993             | 0.011 |
| PRAD              | 124           | 25             | 0.73                   | 0.11 | 93.2%             | 1.5  | 92.0%             | 4.9  | 0.950             | 0.016 |
| READ*             | 48            | 4              | 0.50                   | 0.00 | 100.0%            | 0.0  | 100.0%            | 0.0  | 1.000             | 0.000 |
| STAD*             | 130           | 1              | 0.50                   | 0.00 | 100.0%            | 0.0  | 100.0%            | 0.0  | 1.000             | 0.000 |
| UCEC              | 203           | 23             | 0.59                   | 0.14 | 99.8%             | 0.3  | 100.0%            | 0.0  | 1.000             | 0.000 |

<sup>a</sup> Tumor types are abbreviated as in Figure 1

<sup>b</sup> Probability threshold obtained by applying Youden's Index after logistic regression and ROC curve analysis

<sup>c</sup> TCGA datasets were randomly split in two five times and used as training/validation cohorts. The mean and SD report the average performance across the five iterations.

\* Due to <10 samples in either the tumor or normal cohort, the performance results should be interpreted with caution

Abbreviations: SD = Standard Deviation, AUC = Area Under the ROC Curve, ROC = Receiver Operating Characteristics
