# Supplementary material for: Evaluating Stacked Methylation Markers for Blood-Based Multicancer Detection
Source: MDPI journal article supplement (doi:10.3390/cancers15194826), 2023-10-01
Supplement: s1 [file s1]

**Table S10. Performance of GALR1, TLX1, and ZNF154 in independent validation cohorts**

| Type <sup>a</sup> | Combination           | TP  | FP | TN  | FN  | Sensitivity | Specificity | Dataset                            |
|-------------------|-----------------------|-----|----|-----|-----|-------------|-------------|------------------------------------|
| BRCA              | GALR1                 | 353 | 11 | 138 | 96  | 78.6%       | 92.6%       | GSE37754,<br>GSE66695,<br>GSE69914 |
|                   | TLX1                  | 363 | 27 | 122 | 86  | 80.8%       | 81.9%       |                                    |
|                   | ZNF154                | 248 | 12 | 137 | 201 | 55.2%       | 91.9%       |                                    |
|                   | GALR1 + TLX1          | 386 | 13 | 136 | 63  | 86.0%       | 91.3%       |                                    |
|                   | GALR1 + ZNF154        | 336 | 8  | 141 | 113 | 74.8%       | 94.6%       |                                    |
|                   | TLX1 + ZNF154         | 332 | 9  | 140 | 117 | 73.9%       | 94.0%       |                                    |
|                   | GALR1 + TLX1 + ZNF154 | 357 | 9  | 140 | 92  | 79.5%       | 94.0%       |                                    |
| COAD              | GALR1                 | 28  | 6  | 12  | 7   | 80.0%       | 66.7%       | GSE53051                           |
|                   | TLX1                  | 31  | 1  | 17  | 4   | 88.6%       | 94.4%       |                                    |
|                   | ZNF154                | 26  | 4  | 14  | 9   | 74.3%       | 77.8%       |                                    |
|                   | GALR1 + TLX1          | 33  | 3  | 15  | 2   | 94.3%       | 83.3%       |                                    |
|                   | GALR1 + ZNF154        | 29  | 7  | 11  | 6   | 82.9%       | 61.1%       |                                    |
|                   | TLX1 + ZNF154         | 30  | 1  | 17  | 5   | 85.7%       | 94.4%       |                                    |
|                   | GALR1 + TLX1 + ZNF154 | 33  | 3  | 15  | 2   | 94.3%       | 83.3%       |                                    |
| LUAD              | GALR1                 | 9   | 6  | 5   | 0   | 100.0%      | 45.5%       | GSE53051                           |
|                   | TLX1                  | 9   | 6  | 5   | 0   | 100.0%      | 45.5%       |                                    |
|                   | ZNF154                | 8   | 1  | 10  | 1   | 88.9%       | 90.9%       |                                    |
|                   | GALR1 + TLX1          | 9   | 5  | 6   | 0   | 100.0%      | 54.5%       |                                    |
|                   | GALR1 + ZNF154        | 9   | 3  | 8   | 0   | 100.0%      | 72.7%       |                                    |
|                   | TLX1 + ZNF154         | 9   | 2  | 9   | 0   | 100.0%      | 81.8%       |                                    |
|                   | GALR1 + TLX1 + ZNF154 | 9   | 3  | 8   | 0   | 100.0%      | 72.7%       |                                    |
| PRAD              | GALR1                 | 15  | 4  | 12  | 16  | 48.4%       | 75.0%       | GSE112047                          |
|                   | TLX1                  | 28  | 0  | 16  | 3   | 90.3%       | 100.0%      |                                    |
|                   | ZNF154                | 27  | 0  | 16  | 4   | 87.1%       | 100.0%      |                                    |
|                   | GALR1 + TLX1          | 29  | 1  | 15  | 2   | 93.6%       | 93.8%       |                                    |
|                   | GALR1 + ZNF154        | 28  | 1  | 15  | 3   | 90.3%       | 93.8%       |                                    |
|                   | TLX1 + ZNF154         | 28  | 0  | 16  | 3   | 90.3%       | 100.0%      |                                    |
|                   | GALR1 + TLX1 + ZNF154 | 28  | 0  | 16  | 3   | 90.3%       | 100.0%      |                                    |

<sup>a</sup> Tumor types are abbreviated as in Figure 1

Abbreviations: TP = True Positive, FP = False Positive, TN = True Negative, FN = False Negative,
