# Supplementary material for: Evaluating Stacked Methylation Markers for Blood-Based Multicancer Detection
Source: MDPI journal article supplement (doi:10.3390/cancers15194826), 2023-10-01
Supplement: s1 [file s1]

**Table S9. Performance of the three-marker combination (*GALR1*, *TLX1*, and *ZNF154*) in classifying TCGA tumors using cross validation (validation cohorts)**

| Type <sup>a</sup> | Tumor samples | Normal samples | Sensitivity       |      | Specificity       |      |
|-------------------|---------------|----------------|-------------------|------|-------------------|------|
|                   |               |                | Mean <sup>b</sup> | SD   | Mean <sup>b</sup> | SD   |
| BLCA              | 100           | 10             | 92.4%             | 2.1  | 80.0%             | 12.2 |
| BRCA              | 338           | 48             | 92.7%             | 2.3  | 89.2%             | 6.0  |
| COAD              | 137           | 19             | 95.6%             | 1.3  | 98.9%             | 2.4  |
| HNSC              | 213           | 25             | 99.0%             | 0.6  | 94.4%             | 2.2  |
| KIRC              | 148           | 80             | 84.9%             | 2.7  | 91.3%             | 3.2  |
| KIRP              | 78            | 22             | 72.3%             | 14.7 | 71.8%             | 23.7 |
| LIHC              | 75            | 25             | 92.3%             | 2.6  | 95.2%             | 5.2  |
| LUAD              | 218           | 16             | 98.5%             | 1.5  | 88.8%             | 10.3 |
| LUSC              | 179           | 21             | 98.9%             | 0.9  | 94.3%             | 2.1  |
| PAAD*             | 32            | 4              | 95.6%             | 5.2  | 90.0%             | 13.7 |
| PRAD              | 124           | 24             | 90.9%             | 1.7  | 83.3%             | 5.1  |
| READ*             | 48            | 3              | 97.5%             | 2.3  | 100.0%            | 0.0  |
| STAD*             | 130           | 1              | 98.6%             | 1.0  | 20.0%             | 44.7 |
| UCEC              | 202           | 23             | 98.6%             | 0.5  | 94.8%             | 7.1  |

<sup>a</sup> Tumor types are abbreviated as in Figure 1

<sup>b</sup> TCGA datasets were randomly split in two five times and used as training/validation cohorts. The mean and SD report the average performance across the five iterations.

\* Due to <10 samples in either the tumor or normal cohort, the performance results should be interpreted with caution

Abbreviations: SD = Standard Deviation
