# Supplementary material for: Evaluating Stacked Methylation Markers for Blood-Based Multicancer Detection
Source: MDPI journal article supplement (doi:10.3390/cancers15194826), 2023-10-01
Supplement: s1 [file s1]

**Table S2. Logistic regression coefficients from analysis of TCGA tumor vs normal tissue samples**

| Type | Biomarker combination | Intercept | Covariate |       |        |
|------|-----------------------|-----------|-----------|-------|--------|
|      |                       |           | GALR1     | TLX1  | ZNF154 |
| BLCA | G                     | -0.59     | 6.48      |       |        |
| BLCA | T                     | 0.59      |           | 6.77  |        |
| BLCA | Z                     | -0.97     |           |       | 10.72  |
| BLCA | G + T                 | -1.18     | 5.52      | 4.23  |        |
| BLCA | G + Z                 | -1.47     | 3.26      |       | 7.56   |
| BLCA | T + Z                 | -1.44     |           | 4.13  | 9.20   |
| BLCA | G + T + Z             | -1.57     | 1.79      | 3.09  | 7.60   |
| BRCA | G                     | -0.63     | 9.20      |       |        |
| BRCA | T                     | -0.44     |           | 8.93  |        |
| BRCA | Z                     | 0.22      |           |       | 10.58  |
| BRCA | G + T                 | -1.62     | 7.31      | 6.11  |        |
| BRCA | G + Z                 | -1.64     | 8.49      |       | 7.41   |
| BRCA | T + Z                 | -1.86     |           | 9.28  | 9.60   |
| BRCA | G + T + Z             | -2.56     | 6.27      | 6.61  | 7.44   |
| COAD | G                     | -2.37     | 9.60      |       |        |
| COAD | T                     | -2.50     |           | 11.25 |        |
| COAD | Z                     | -3.34     |           |       | 9.42   |
| COAD | G + T                 | -5.24     | 8.22      | 11.13 |        |
| COAD | G + Z                 | -8.39     | 11.13     |       | 10.32  |
| COAD | T + Z                 | -4.32     |           | 11.20 | 3.57   |
| COAD | G + T + Z             | -6.09     | 8.22      | 10.75 | 1.82   |
| HNSC | G                     | -1.05     | 8.00      |       |        |
| HNSC | T                     | -0.90     |           | 9.59  |        |
| HNSC | Z                     | -3.39     |           |       | 21.90  |
| HNSC | G + T                 | -4.87     | 9.26      | 11.04 |        |
| HNSC | G + Z                 | -5.75     | 8.08      |       | 19.61  |
| HNSC | T + Z                 | -4.86     |           | 8.50  | 17.27  |
| HNSC | G + T + Z             | -6.32     | 6.68      | 6.41  | 15.30  |
| KIRC | G                     | -1.18     | 32.84     |       |        |
| KIRC | T                     | -1.67     |           | 36.81 |        |
| KIRC | Z                     | -5.36     |           |       | 352.81 |
| KIRC | G + T                 | -2.27     | 29.50     | 22.35 |        |
| KIRC | G + Z                 | -5.47     | 17.83     |       | 305.39 |
| KIRC | T + Z                 | -5.96     |           | 17.86 | 325.45 |
| KIRC | G + T + Z             | -5.86     | 16.83     | 11.92 | 289.35 |
| KIRP | G                     | 0.68      | 10.33     |       |        |
| KIRP | T                     | -0.51     |           | 22.42 |        |
| KIRP | Z                     | -2.29     |           |       | 163.56 |
| KIRP | G + T                 | -0.66     | 5.76      | 20.50 |        |
| KIRP | G + Z                 | -2.30     | 1.95      |       | 159.24 |
| KIRP | T + Z                 | -2.61     |           | 9.81  | 143.67 |
| KIRP | G + T + Z             | -2.63     | -1.53     | 10.14 | 146.90 |
| LIHC | G                     | 0.32      | 6.31      |       |        |
| LIHC | T                     | -0.57     |           | 6.82  |        |
| LIHC | Z                     | -1.50     |           |       | 24.02  |
| LIHC | G + T                 | -1.06     | 5.68      | 6.55  |        |
| LIHC | G + Z                 | -1.46     | -1.42     |       | 25.59  |
| LIHC | T + Z                 | -2.31     |           | 5.90  | 18.25  |
| LIHC | G + T + Z             | -2.22     | -4.22     | 6.49  | 20.41  |
| LUAD | G                     | -1.29     | 23.91     |       |        |
| LUAD | T                     | -3.32     |           | 57.97 |        |
| LUAD | Z                     | -0.26     |           |       | 70.91  |
| LUAD | G + T                 | -4.72     | 18.93     | 40.84 |        |
| LUAD | G + Z                 | -3.58     | 21.81     |       | 67.96  |
| LUAD | T + Z                 | -6.53     |           | 75.25 | 41.86  |
| LUAD | G + T + Z             | -9.42     | 15.65     | 76.43 | 68.11  |
| LUSC | G                     | -0.72     | 21.50     |       |        |
| LUSC | T                     | -3.26     |           | 62.42 |        |
| LUSC | Z                     | -4.11     |           |       | 204.98 |
| LUSC | G + T                 | -4.31     | 17.65     | 42.08 |        |
| LUSC | G + Z                 | -4.48     | 16.78     |       | 91.49  |
| LUSC | T + Z                 | -6.25     |           | 64.24 | 80.20  |
| LUSC | G + T + Z             | -6.12     | 16.61     | 15.00 | 110.83 |
| PAAD | G                     | -1.21     | 16.78     |       |        |
| PAAD | T                     | -3.09     |           | 48.27 |        |

|      |           |         |          |           |          |
|------|-----------|---------|----------|-----------|----------|
| PAAD | Z         | -5.69   |          |           | 273.87   |
| PAAD | G + T     | -7.01   | 15.09    | 66.82     |          |
| PAAD | G + Z     | -6.49   | 6.60     |           | 258.10   |
| PAAD | T + Z     | -7.43   |          | 34.67     | 226.52   |
| PAAD | G + T + Z | -8.90   | 6.80     | 36.39     | 246.86   |
| PRAD | G         | 0.22    | 10.70    |           |          |
| PRAD | T         | -1.65   |          | 7.98      |          |
| PRAD | Z         | -1.37   |          |           | 9.42     |
| PRAD | G + T     | -1.81   | 5.05     | 6.61      |          |
| PRAD | G + Z     | -1.62   | 6.10     |           | 7.55     |
| PRAD | T + Z     | -1.71   |          | 6.65      | 1.88     |
| PRAD | G + T + Z | -1.84   | 4.92     | 5.65      | 1.39     |
| READ | G         | 0.31    | 6.98     |           |          |
| READ | T         | -2.43   |          | 15.46     |          |
| READ | Z         | -8.27   |          |           | 19.15    |
| READ | G + T     | -3.51   | 6.18     | 11.12     |          |
| READ | G + Z     | -20.50  | 15.61    |           | 34.78    |
| READ | T + Z     | -768.05 |          | 1581.34   | 917.80   |
| READ | G + T + Z | -288.60 | 232.14   | 131.74    | 385.26   |
| STAD | G         | 2.16    | 4.12     |           |          |
| STAD | T         | 2.30    |          | 4.60      |          |
| STAD | Z         | -0.19   |          |           | 16.88    |
| STAD | G + T     | 1.74    | 1.44     | 3.91      |          |
| STAD | G + Z     | 1.15    | -3.04    |           | 19.03    |
| STAD | T + Z     | 9.02    |          | -68.66    | 153.62   |
| STAD | G + T + Z | 3069.70 | -4877.41 | -10488.81 | 28880.98 |
| UCEC | G         | 0.93    | 5.60     |           |          |
| UCEC | T         | -0.21   |          | 9.93      |          |
| UCEC | Z         | -5.76   |          |           | 20.47    |
| UCEC | G + T     | -0.51   | 3.49     | 8.72      |          |
| UCEC | G + Z     | -5.59   | 2.57     |           | 18.19    |
| UCEC | T + Z     | -5.93   |          | 7.40      | 16.24    |
| UCEC | G + T + Z | -5.91   | 0.61     | 7.19      | 15.97    |
