# Supplementary material for: Evaluating Stacked Methylation Markers for Blood-Based Multicancer Detection
Source: Cancers (Basel). 2023 Oct 1;15(19):4826. doi: 10.3390/cancers15194826 (PMC10571530; doi:10.3390/cancers15194826)
Supplement: Supplementary file 1 [file cancers-15-04826-s001.zip]

Archive with 24 entries (24 files):
- Supplementary Figures.pptx
- __MACOSX/._Supplementary Figures.pptx
- Table S11.pdf
- __MACOSX/._Table S11.pdf
- Table S10.pdf
- __MACOSX/._Table S10.pdf
- Table S9.pdf
- __MACOSX/._Table S9.pdf
- Table S8.pdf
- __MACOSX/._Table S8.pdf
- Table S7.pdf
- __MACOSX/._Table S7.pdf
- Table S6.xlsx
- __MACOSX/._Table S6.xlsx
- Table S5.xlsx
- __MACOSX/._Table S5.xlsx
- Table S4.pdf
- __MACOSX/._Table S4.pdf
- Table S3.pdf
- __MACOSX/._Table S3.pdf
- Table S2.pdf
- __MACOSX/._Table S2.pdf
- Table S1.xlsx
- __MACOSX/._Table S1.xlsx
