# Supplementary material for: Evaluating Stacked Methylation Markers for Blood-Based Multicancer Detection
Source: Cancers (Basel). 2023 Oct 1;15(19):4826. doi: 10.3390/cancers15194826 (PMC10571530; doi:10.3390/cancers15194826)
Supplement: Supplementary file 1 [file cancers-15-04826-s001.zip › Table S1.xlsx]

## Sheet: Sheet1
Table S1
mean						median
probe	normal	tumor	Type			probe	normal	tumor	Type
cg03502002	0.190085	0.706326	BLCA			cg03502002	0.09885	0.7617	BLCA
cg14861089	0.1035	0.526551	BLCA			cg14861089	0.0507	0.5946	BLCA
cg21790626	0.094775	0.596057	BLCA			cg21790626	0.0315	0.5925	BLCA
cg03502002	0.0912073	0.593915	BRCA			cg03502002	0.04225	0.67335	BRCA
cg14861089	0.103315	0.578989	BRCA			cg14861089	0.0714	0.66365	BRCA
cg21790626	0.0547281	0.385161	BRCA			cg21790626	0.0235	0.4033	BRCA
cg03502002	0.181187	0.728625	COAD			cg03502002	0.1773	0.7697	COAD
cg14861089	0.136942	0.740191	COAD			cg14861089	0.1091	0.7814	COAD
cg21790626	0.496095	0.634383	COAD			cg21790626	0.5125	0.63655	COAD
cg03502002	0.1562	0.649235	HNSC			cg03502002	0.1335	0.69755	HNSC
cg14861089	0.114086	0.619715	HNSC			cg14861089	0.0899	0.6782	HNSC
cg21790626	0.071798	0.531187	HNSC			cg21790626	0.05265	0.5393	HNSC
cg03502002	0.060064	0.281325	LIHC			cg03502002	0.039	0.0857	LIHC
cg14861089	0.111258	0.514707	LIHC			cg14861089	0.09045	0.5857	LIHC
cg21790626	0.030128	0.477374	LIHC			cg21790626	0.0244	0.5289	LIHC
cg03502002	0.0476094	0.566037	LUAD			cg03502002	0.03235	0.6332	LUAD
cg14861089	0.0578469	0.485154	LUAD			cg14861089	0.05495	0.5334	LUAD
cg21790626	0.02	0.3265	LUAD			cg21790626	0.01865	0.3613	LUAD
cg03502002	0.0492429	0.482523	LUSC			cg03502002	0.0369	0.5509	LUSC
cg14861089	0.04545	0.589663	LUSC			cg14861089	0.04335	0.6682	LUSC
cg21790626	0.0163452	0.479007	LUSC			cg21790626	0.01585	0.5204	LUSC
cg03502002	0.0235887	0.276789	KIRC			cg03502002	0.016	0.1746	KIRC
cg14861089	0.0461338	0.170583	KIRC			cg14861089	0.0439	0.0698	KIRC
cg21790626	0.0131525	0.150055	KIRC			cg21790626	0.013	0.04725	KIRC
cg03502002	0.0354511	0.123844	KIRP			cg03502002	0.0209	0.0377	KIRP
cg14861089	0.0584756	0.200144	KIRP			cg14861089	0.0536	0.07965	KIRP
cg21790626	0.0163267	0.159311	KIRP			cg21790626	0.0149	0.0291	KIRP
cg03502002	0.0556222	0.470369	PAAD			cg03502002	0.0285	0.5034	PAAD
cg14861089	0.0667556	0.328429	PAAD			cg14861089	0.0689	0.2997	PAAD
cg21790626	0.0155222	0.298345	PAAD			cg21790626	0.0159	0.2981	PAAD
cg03502002	0.0531694	0.337892	PRAD			cg03502002	0.0286	0.3077	PRAD
cg14861089	0.164149	0.686781	PRAD			cg14861089	0.073	0.7395	PRAD
cg21790626	0.131937	0.523679	PRAD			cg21790626	0.0493	0.53615	PRAD
cg03502002	0.111286	0.64297	READ			cg03502002	0.0732	0.73325	READ
cg14861089	0.103429	0.777351	READ			cg14861089	0.1004	0.808	READ
cg21790626	0.483586	0.670846	READ			cg21790626	0.4508	0.68045	READ
cg03502002	0.5612	0.720103	STAD			cg03502002	0.5612	0.7395	STAD
cg14861089	0.4064	0.682315	STAD			cg14861089	0.4064	0.7187	STAD
cg21790626	0.11535	0.54186	STAD			cg21790626	0.11535	0.5506	STAD
cg03502002	0.0659935	0.527613	UCEC			cg03502002	0.02905	0.7265	UCEC
cg14861089	0.0769087	0.654429	UCEC			cg14861089	0.06245	0.791	UCEC
cg21790626	0.0902348	0.714173	UCEC			cg21790626	0.03225	0.7221	UCEC
