# Supplementary material for: Evaluating Stacked Methylation Markers for Blood-Based Multicancer Detection
Source: Cancers (Basel). 2023 Oct 1;15(19):4826. doi: 10.3390/cancers15194826 (PMC10571530; doi:10.3390/cancers15194826)
Supplement: Supplementary file 1 [file cancers-15-04826-s001.zip › Table S6.xlsx]

## Sheet: Introduction
Table S6. Methylaiton density for classification and Read coverage for WGBS data from CancerDetector and CancerLocator studies.
Below are the sample names reported in whole genome bisulfite sequencing (WGBS) data from cell free DNA of plasma generated from lung cancer (n=9) or normal plasma (non-cancer samples) (n=4) marked "UCLA__data_post_bismark" [30,31].
Additional WGBS data from plasma of hepatocellular cancer /HCC (n=26+4) or healthy individuals (n=32+4) are labeled "CUHK_WGBS" and "UCLA_data_post_bismark"was obtained from [31,32].
citation #
33	Kang, S.; Li, Q.; Chen, Q.; Zhou, Y.; Park, S.; Lee, G.; Grimes, B.; Krysan, K.; Yu, M.; Wang, W.; et al. CancerLocator: non-invasive cancer diagnosis and tissue-of-origin prediction using methylation profiles of cell-free DNA. Genome biology 2017, 18, 53, doi:10.1186/s13059-017-1191-5.
34	Li, W.; Li, Q.; Kang, S.; Same, M.; Zhou, Y.; Sun, C.; Liu, C.C.; Matsuoka, L.; Sher, L.; Wong, W.H.; et al. CancerDetector: ultrasensitive and non-invasive cancer detection at the resolution of individual reads using cell-free DNA methylation sequencing data. Nucleic acids research 2018, 46, e89, doi:10.1093/nar/gky423.
35	Chan, K.C.; Jiang, P.; Chan, C.W.; Sun, K.; Wong, J.; Hui, E.P.; Chan, S.L.; Chan, W.C.; Hui, D.S.; Ng, S.S.; et al. Noninvasive detection of cancer-associated genome-wide hypomethylation and copy number aberrations by plasma DNA bisulfite sequencing. Proceedings of the National Academy of Sciences of the United States of America 2013, 110, 18761-18768, doi:10.1073/pnas.1313995110.
In each excel sheet read coverage data are presented for the locus ZNF154, GALR1 and TLX1 +/- 300 bp centered on the Illumina probe position (i.e., 600 bp window).
For the purpose of calculating coverage data are separated by study: UCLA or CUHK.
Each sheet has 2 large panels. Rows A-AC represent read counts. Rows AD-AZ represent nucleotide level coverage.
The computed average level coverage is listed at the bottom of Rows AD-AZ for every sample.

## Sheet: MethDens thresholds per locus
Table S6. Methylaiton density thresholds applied in EpiClass analysis of WGBS data from plasma
Sample cohort	Marker	Methylation density threshold
Lung cancer
	GALR1	0.35
	TLX1	0.1
	ZNF154	0.1
Hepatocellular carcinoma
	GALR1	0.15
	TLX1	0
	ZNF154	0.35

## Sheet: WGBS sample sheet
Table S6. Read coverage for WGBS data from CancerDetector and CancerLocator studies.
	sample	patient type	tissue	set	sequencing	sample_input	stage
	CTR101	control	plasma	CUHK_WGBS	WGBS	4 mL
	CTR103	control	plasma	CUHK_WGBS	WGBS	4 mL
	CTR104	control	plasma	CUHK_WGBS	WGBS	4 mL
	CTR106	control	plasma	CUHK_WGBS	WGBS	4 mL
	CTR107	control	plasma	CUHK_WGBS	WGBS	4 mL
	CTR108	control	plasma	CUHK_WGBS	WGBS	4 mL
	CTR110	control	plasma	CUHK_WGBS	WGBS	4 mL
	CTR111	control	plasma	CUHK_WGBS	WGBS	4 mL
	CTR113	control	plasma	CUHK_WGBS	WGBS	4 mL
	CTR114	control	plasma	CUHK_WGBS	WGBS	4 mL
	CTR117	control	plasma	CUHK_WGBS	WGBS	4 mL
	CTR118	control	plasma	CUHK_WGBS	WGBS	4 mL
	CTR126	control	plasma	CUHK_WGBS	WGBS	4 mL
	CTR127	control	plasma	CUHK_WGBS	WGBS	4 mL
	CTR128	control	plasma	CUHK_WGBS	WGBS	4 mL
	CTR129	control	plasma	CUHK_WGBS	WGBS	4 mL
	CTR131	control	plasma	CUHK_WGBS	WGBS	4 mL
	CTR132	control	plasma	CUHK_WGBS	WGBS	4 mL
	CTR134	control	plasma	CUHK_WGBS	WGBS	4 mL
	CTR147	control	plasma	CUHK_WGBS	WGBS	4 mL
	CTR148	control	plasma	CUHK_WGBS	WGBS	4 mL
	CTR149	control	plasma	CUHK_WGBS	WGBS	4 mL
	CTR150	control	plasma	CUHK_WGBS	WGBS	4 mL
	CTR151	control	plasma	CUHK_WGBS	WGBS	4 mL
	CTR152	control	plasma	CUHK_WGBS	WGBS	4 mL
	CTR153	control	plasma	CUHK_WGBS	WGBS	4 mL
	CTR154	control	plasma	CUHK_WGBS	WGBS	4 mL
	CTR84	control	plasma	CUHK_WGBS	WGBS	4 mL
	CTR85	control	plasma	CUHK_WGBS	WGBS	4 mL
	CTR86	control	plasma	CUHK_WGBS	WGBS	4 mL
	CTR97	control	plasma	CUHK_WGBS	WGBS	4 mL
	CTR98	control	plasma	CUHK_WGBS	WGBS	4 mL
	HOT151	HCC	plasma	CUHK_WGBS	WGBS	4 mL
	HOT156	HCC	plasma	CUHK_WGBS	WGBS	4 mL
	HOT159	HCC	plasma	CUHK_WGBS	WGBS	4 mL
	HOT162	HCC	plasma	CUHK_WGBS	WGBS	4 mL
	HOT164	HCC	plasma	CUHK_WGBS	WGBS	4 mL
	HOT167	HCC	plasma	CUHK_WGBS	WGBS	4 mL
	HOT170	HCC	plasma	CUHK_WGBS	WGBS	4 mL
	HOT172	HCC	plasma	CUHK_WGBS	WGBS	4 mL
	HOT192	HCC	plasma	CUHK_WGBS	WGBS	4 mL
	HOT197	HCC	plasma	CUHK_WGBS	WGBS	4 mL
	HOT198	HCC	plasma	CUHK_WGBS	WGBS	4 mL
	HOT204	HCC	plasma	CUHK_WGBS	WGBS	4 mL
	HOT205	HCC	plasma	CUHK_WGBS	WGBS	4 mL
	HOT207	HCC	plasma	CUHK_WGBS	WGBS	4 mL
	HOT208	HCC	plasma	CUHK_WGBS	WGBS	4 mL
	HOT215	HCC	plasma	CUHK_WGBS	WGBS	4 mL
	HOT222	HCC	plasma	CUHK_WGBS	WGBS	4 mL
	HOT224	HCC	plasma	CUHK_WGBS	WGBS	4 mL
	HOT227	HCC	plasma	CUHK_WGBS	WGBS	4 mL
	HOT229	HCC	plasma	CUHK_WGBS	WGBS	4 mL
	HOT233	HCC	plasma	CUHK_WGBS	WGBS	4 mL
	HOT236	HCC	plasma	CUHK_WGBS	WGBS	4 mL
	HOT238	HCC	plasma	CUHK_WGBS	WGBS	4 mL
	HOT240	HCC	plasma	CUHK_WGBS	WGBS	4 mL
	TBR36prePlsm	HCC	plasma	CUHK_WGBS	WGBS	4 mL
	TBR34prePlsm	HCC	plasma	CUHK_WGBS	WGBS	4 mL
	HCC1	HCC	tumor	UCLA_Data_post_bismark	WGBS		not included in study
	HCC2	HCC	tumor	UCLA_Data_post_bismark	WGBS		not included in study
	L948	Lung cancer	plasma	UCLA_Data_post_bismark	WGBS	5 mL	T1aN0
	L954	Lung cancer	plasma	UCLA_Data_post_bismark	WGBS	5 mL
	L955	Lung cancer	plasma	UCLA_Data_post_bismark	WGBS	5 mL	T2aN0
	L962	Lung cancer	plasma	UCLA_Data_post_bismark	WGBS	5 mL	T2aN0
	L964	Lung cancer	plasma	UCLA_Data_post_bismark	WGBS	5 mL	T3N1M0
	L978	Lung cancer	plasma	UCLA_Data_post_bismark	WGBS	5 mL	T1
	L982	Lung cancer	plasma	UCLA_Data_post_bismark	WGBS	5 mL
	L987	Lung cancer	plasma	UCLA_Data_post_bismark	WGBS	5 mL	T2aN0
	L989	Lung cancer	plasma	UCLA_Data_post_bismark	WGBS	5 mL	T1bN0
	LIC1L	HCC	plasma	UCLA_Data_post_bismark	WGBS	5 mL
	LIC2L	HCC	plasma	UCLA_Data_post_bismark	WGBS	5 mL
	LIC3L	HCC	plasma	UCLA_Data_post_bismark	WGBS	5 mL
	LIC4L	HCC	plasma	UCLA_Data_post_bismark	WGBS	5 mL
	N1L	control	plasma	UCLA_Data_post_bismark	WGBS	5 mL
	N2L	control	plasma	UCLA_Data_post_bismark	WGBS	5 mL
	N3L	control	plasma	UCLA_Data_post_bismark	WGBS	5 mL
	N4L	control	plasma	UCLA_Data_post_bismark	WGBS	5 mL

## Sheet: UCLA TLX1
chr	interval_start	interval_stop	methSeqStart	methSeqStop	methSeqLength	numU	numM	MD	HCC1	HCC2	L948	L954	L955	L962	L964	L978	L982	L987	L989	LIC1L	LIC2L	LIC3L	LIC4L	N1L	N2L	N3L	N4L		clipFromStart	clipFromStop	useFragLen		HCC1	HCC2	L948	L954	L955	L962	L964	L978	L982	L987	L989	LIC1L	LIC2L	LIC3L	LIC4L	N1L	N2L
chr10	102894743	102895343	102894624	102894744	120	10	0	0												1									119	0	1		0	0	0	0	0	0	0	0	0	0	0	1	0	0	0	0	0
chr10	102894743	102895343	102894626	102894935	239	19	1	0.05							1														117	0	122		0	0	0	0	0	0	122	0	0	0	0	0	0	0	0	0	0
chr10	102894743	102895343	102894628	102894946	237	21	0	0																1					115	0	122		0	0	0	0	0	0	0	0	0	0	0	0	0	0	0	122	0
chr10	102894743	102895343	102894629	102894778	149	10	0	0																			1		114	0	35		0	0	0	0	0	0	0	0	0	0	0	0	0	0	0	0	0
chr10	102894743	102895343	102894630	102894750	120	10	0	0														1							113	0	7		0	0	0	0	0	0	0	0	0	0	0	0	0	7	0	0	0
chr10	102894743	102895343	102894634	102894755	121	10	0	0														1							109	0	12		0	0	0	0	0	0	0	0	0	0	0	0	0	12	0	0	0
chr10	102894743	102895343	102894634	102894794	160	10	0	0											1										109	0	51		0	0	0	0	0	0	0	0	0	0	51	0	0	0	0	0	0
chr10	102894743	102895343	102894634	102894853	219	11	3	0.214286																	1				109	0	110		0	0	0	0	0	0	0	0	0	0	0	0	0	0	0	0	110
chr10	102894743	102895343	102894639	102894760	121	10	0	0							1				1										104	0	17		0	0	0	0	0	0	17	0	0	0	17	0	0	0	0	0	0
chr10	102894743	102895343	102894639	102894770	131	10	0	0		1																			104	0	27		0	27	0	0	0	0	0	0	0	0	0	0	0	0	0	0	0
chr10	102894743	102895343	102894639	102894771	132	10	0	0	1																				104	0	28		28	0	0	0	0	0	0	0	0	0	0	0	0	0	0	0	0
chr10	102894743	102895343	102894639	102894774	135	10	0	0		1																			104	0	31		0	31	0	0	0	0	0	0	0	0	0	0	0	0	0	0	0
chr10	102894743	102895343	102894639	102894837	198	9	2	0.181818	1																				104	0	94		94	0	0	0	0	0	0	0	0	0	0	0	0	0	0	0	0
chr10	102894743	102895343	102894639	102894881	230	13	3	0.1875		1																			104	0	126		0	126	0	0	0	0	0	0	0	0	0	0	0	0	0	0	0
chr10	102894743	102895343	102894640	102894774	134	10	0	0	1																				103	0	31		31	0	0	0	0	0	0	0	0	0	0	0	0	0	0	0	0
chr10	102894743	102895343	102894640	102894790	150	10	0	0									1												103	0	47		0	0	0	0	0	0	0	0	47	0	0	0	0	0	0	0	0
chr10	102894743	102895343	102894640	102894970	241	19	3	0.136364		1																			103	0	138		0	138	0	0	0	0	0	0	0	0	0	0	0	0	0	0	0
chr10	102894743	102895343	102894642	102894762	120	9	0	0										1											101	0	19		0	0	0	0	0	0	0	0	0	19	0	0	0	0	0	0	0
chr10	102894743	102895343	102894644	102894779	135	9	0	0			1																		99	0	36		0	0	36	0	0	0	0	0	0	0	0	0	0	0	0	0	0
chr10	102894743	102895343	102894645	102894765	120	8	1	0.111111			1																		98	0	22		0	0	22	0	0	0	0	0	0	0	0	0	0	0	0	0	0
chr10	102894743	102895343	102894645	102894766	121	9	0	0															1						98	0	23		0	0	0	0	0	0	0	0	0	0	0	0	0	0	23	0	0
chr10	102894743	102895343	102894645	102894778	133	9	0	0														1							98	0	35		0	0	0	0	0	0	0	0	0	0	0	0	0	35	0	0	0
chr10	102894743	102895343	102894645	102894845	200	11	0	0																1					98	0	102		0	0	0	0	0	0	0	0	0	0	0	0	0	0	0	102	0
chr10	102894743	102895343	102894646	102894766	120	9	0	0																1					97	0	23		0	0	0	0	0	0	0	0	0	0	0	0	0	0	0	23	0
chr10	102894743	102895343	102894646	102894774	128	9	0	0																		1			97	0	31		0	0	0	0	0	0	0	0	0	0	0	0	0	0	0	0	0
chr10	102894743	102895343	102894646	102894775	129	6	3	0.333333							1														97	0	32		0	0	0	0	0	0	32	0	0	0	0	0	0	0	0	0	0
chr10	102894743	102895343	102894646	102894781	135	9	0	0													1								97	0	38		0	0	0	0	0	0	0	0	0	0	0	0	38	0	0	0	0
chr10	102894743	102895343	102894647	102894767	120	9	0	0		1			1																96	0	24		0	24	0	0	24	0	0	0	0	0	0	0	0	0	0	0	0
chr10	102894743	102895343	102894647	102894780	133	9	0	0						1															96	0	37		0	0	0	0	0	37	0	0	0	0	0	0	0	0	0	0	0
chr10	102894743	102895343	102894647	102894810	163	10	0	0								1													96	0	67		0	0	0	0	0	0	0	67	0	0	0	0	0	0	0	0	0
chr10	102894743	102895343	102894648	102894773	125	9	0	0	1																				95	0	30		30	0	0	0	0	0	0	0	0	0	0	0	0	0	0	0	0
chr10	102894743	102895343	102894649	102894788	139	8	0	0				1																	94	0	45		0	0	0	45	0	0	0	0	0	0	0	0	0	0	0	0	0
chr10	102894743	102895343	102894650	102894771	121	8	0	0			1							1											93	0	28		0	0	28	0	0	0	0	0	0	28	0	0	0	0	0	0	0
chr10	102894743	102895343	102894651	102894773	122	6	2	0.25	1																				92	0	30		30	0	0	0	0	0	0	0	0	0	0	0	0	0	0	0	0
chr10	102894743	102895343	102894651	102894934	241	7	12	0.631579	1																				92	0	149		149	0	0	0	0	0	0	0	0	0	0	0	0	0	0	0	0
chr10	102894743	102895343	102894652	102894746	94	8	0	0			1																		91	0	3		0	0	3	0	0	0	0	0	0	0	0	0	0	0	0	0	0
chr10	102894743	102895343	102894652	102894773	121	6	1	0.142857		1																			91	0	30		0	30	0	0	0	0	0	0	0	0	0	0	0	0	0	0	0
chr10	102894743	102895343	102894652	102894773	121	8	0	0	1																				91	0	30		30	0	0	0	0	0	0	0	0	0	0	0	0	0	0	0	0
chr10	102894743	102895343	102894652	102894776	124	8	0	0		1																			91	0	33		0	33	0	0	0	0	0	0	0	0	0	0	0	0	0	0	0
chr10	102894743	102895343	102894652	102894787	135	8	0	0													1								91	0	44		0	0	0	0	0	0	0	0	0	0	0	0	44	0	0	0	0
chr10	102894743	102895343	102894652	102894882	230	14	0	0		1																			91	0	139		0	139	0	0	0	0	0	0	0	0	0	0	0	0	0	0	0
chr10	102894743	102895343	102894653	102894763	110	8	0	0													1								90	0	20		0	0	0	0	0	0	0	0	0	0	0	0	20	0	0	0	0
chr10	102894743	102895343	102894653	102894773	120	8	0	0														1							90	0	30		0	0	0	0	0	0	0	0	0	0	0	0	0	30	0	0	0
chr10	102894743	102895343	102894653	102894800	147	7	1	0.125											1										90	0	57		0	0	0	0	0	0	0	0	0	0	57	0	0	0	0	0	0
chr10	102894743	102895343	102894653	102894815	162	9	0	0												1									90	0	72		0	0	0	0	0	0	0	0	0	0	0	72	0	0	0	0	0
chr10	102894743	102895343	102894653	102894833	180	9	0	0																			1		90	0	90		0	0	0	0	0	0	0	0	0	0	0	0	0	0	0	0	0
chr10	102894743	102895343	102894653	102894912	238	16	2	0.111111							1														90	0	148		0	0	0	0	0	0	148	0	0	0	0	0	0	0	0	0	0
chr10	102894743	102895343	102894654	102894775	121	8	0	0		1																			89	0	32		0	32	0	0	0	0	0	0	0	0	0	0	0	0	0	0	0
chr10	102894743	102895343	102894654	102894824	170	9	0	0			1																		89	0	81		0	0	81	0	0	0	0	0	0	0	0	0	0	0	0	0	0
chr10	102894743	102895343	102894660	102894804	144	6	2	0.25																1					83	0	61		0	0	0	0	0	0	0	0	0	0	0	0	0	0	0	61	0
chr10	102894743	102895343	102894660	102894822	162	8	0	0											1										83	0	79		0	0	0	0	0	0	0	0	0	0	79	0	0	0	0	0	0
chr10	102894743	102895343	102894662	102894782	120	7	0	0																	1				81	0	39		0	0	0	0	0	0	0	0	0	0	0	0	0	0	0	0	39
chr10	102894743	102895343	102894663	102894839	176	8	0	0																			1		80	0	96		0	0	0	0	0	0	0	0	0	0	0	0	0	0	0	0	0
chr10	102894743	102895343	102894665	102894810	145	8	0	0																	1				78	0	67		0	0	0	0	0	0	0	0	0	0	0	0	0	0	0	0	67
chr10	102894743	102895343	102894665	102894812	147	8	0	0																			1		78	0	69		0	0	0	0	0	0	0	0	0	0	0	0	0	0	0	0	0
chr10	102894743	102895343	102894665	102894817	152	7	1	0.125			1																		78	0	74		0	0	74	0	0	0	0	0	0	0	0	0	0	0	0	0	0
chr10	102894743	102895343	102894666	102894787	121	3	3	0.5							1														77	0	44		0	0	0	0	0	0	44	0	0	0	0	0	0	0	0	0	0
chr10	102894743	102895343	102894668	102894788	120	7	0	0													1								75	0	45		0	0	0	0	0	0	0	0	0	0	0	0	45	0	0	0	0
chr10	102894743	102895343	102894668	102894815	147	8	0	0													1								75	0	72		0	0	0	0	0	0	0	0	0	0	0	0	72	0	0	0	0
chr10	102894743	102895343	102894668	102894830	162	4	4	0.5					1																75	0	87		0	0	0	0	87	0	0	0	0	0	0	0	0	0	0	0	0
chr10	102894743	102895343	102894668	102894836	168	8	0	0				1																	75	0	93		0	0	0	93	0	0	0	0	0	0	0	0	0	0	0	0	0
chr10	102894743	102895343	102894669	102894816	147	8	0	0													1								74	0	73		0	0	0	0	0	0	0	0	0	0	0	0	73	0	0	0	0
chr10	102894743	102895343	102894671	102894820	149	8	0	0					1																72	0	77		0	0	0	0	77	0	0	0	0	0	0	0	0	0	0	0	0
chr10	102894743	102895343	102894672	102894839	167	8	0	0																1					71	0	96		0	0	0	0	0	0	0	0	0	0	0	0	0	0	0	96	0
chr10	102894743	102895343	102894672	102894845	173	9	0	0								1													71	0	102		0	0	0	0	0	0	0	102	0	0	0	0	0	0	0	0	0
chr10	102894743	102895343	102894673	102894794	121	7	0	0														1							70	0	51		0	0	0	0	0	0	0	0	0	0	0	0	0	51	0	0	0
chr10	102894743	102895343	102894674	102894813	139	8	0	0						1															69	0	70		0	0	0	0	0	70	0	0	0	0	0	0	0	0	0	0	0
chr10	102894743	102895343	102894674	102894845	171	9	0	0											1										69	0	102		0	0	0	0	0	0	0	0	0	0	102	0	0	0	0	0	0
chr10	102894743	102895343	102894674	102894888	214	7	6	0.461538	1																				69	0	145		145	0	0	0	0	0	0	0	0	0	0	0	0	0	0	0	0
chr10	102894743	102895343	102894674	102894942	241	18	0	0												1									69	0	172		0	0	0	0	0	0	0	0	0	0	0	172	0	0	0	0	0
chr10	102894743	102895343	102894675	102894760	85	6	1	0.142857		1																			68	0	17		0	17	0	0	0	0	0	0	0	0	0	0	0	0	0	0	0
chr10	102894743	102895343	102894676	102894767	91	7	0	0		1																			67	0	24		0	24	0	0	0	0	0	0	0	0	0	0	0	0	0	0	0
chr10	102894743	102895343	102894676	102894799	123	7	0	0																	1				67	0	56		0	0	0	0	0	0	0	0	0	0	0	0	0	0	0	0	56
chr10	102894743	102895343	102894677	102894826	149	8	0	0						1															66	0	83		0	0	0	0	0	83	0	0	0	0	0	0	0	0	0	0	0
chr10	102894743	102895343	102894677	102894853	176	10	0	0																		1			66	0	110		0	0	0	0	0	0	0	0	0	0	0	0	0	0	0	0	0
chr10	102894743	102895343	102894678	102894850	172	10	0	0						1		1													65	0	107		0	0	0	0	0	107	0	107	0	0	0	0	0	0	0	0	0
chr10	102894743	102895343	102894679	102894947	241	18	0	0																			1		64	0	177		0	0	0	0	0	0	0	0	0	0	0	0	0	0	0	0	0
chr10	102894743	102895343	102894680	102894800	120	7	0	0																	1				63	0	57		0	0	0	0	0	0	0	0	0	0	0	0	0	0	0	0	57
chr10	102894743	102895343	102894680	102894807	127	8	0	0														1							63	0	64		0	0	0	0	0	0	0	0	0	0	0	0	0	64	0	0	0
chr10	102894743	102895343	102894681	102894820	139	2	6	0.75							1														62	0	77		0	0	0	0	0	0	77	0	0	0	0	0	0	0	0	0	0
chr10	102894743	102895343	102894681	102894834	153	8	0	0							1														62	0	91		0	0	0	0	0	0	91	0	0	0	0	0	0	0	0	0	0
chr10	102894743	102895343	102894681	102894837	156	8	0	0													1								62	0	94		0	0	0	0	0	0	0	0	0	0	0	0	94	0	0	0	0
chr10	102894743	102895343	102894681	102894839	158	8	0	0									1												62	0	96		0	0	0	0	0	0	0	0	96	0	0	0	0	0	0	0	0
chr10	102894743	102895343	102894681	102894842	161	8	0	0											1										62	0	99		0	0	0	0	0	0	0	0	0	0	99	0	0	0	0	0	0
chr10	102894743	102895343	102894681	102894845	164	9	0	0																	1				62	0	102		0	0	0	0	0	0	0	0	0	0	0	0	0	0	0	0	102
chr10	102894743	102895343	102894681	102894884	203	13	0	0							1														62	0	141		0	0	0	0	0	0	141	0	0	0	0	0	0	0	0	0	0
chr10	102894743	102895343	102894681	102894910	229	17	0	0													1								62	0	167		0	0	0	0	0	0	0	0	0	0	0	0	167	0	0	0	0
chr10	102894743	102895343	102894682	102894827	145	8	0	0																			1		61	0	84		0	0	0	0	0	0	0	0	0	0	0	0	0	0	0	0	0
chr10	102894743	102895343	102894683	102894830	147	8	0	0								1													60	0	87		0	0	0	0	0	0	0	87	0	0	0	0	0	0	0	0	0
chr10	102894743	102895343	102894683	102894836	153	8	0	0									1												60	0	93		0	0	0	0	0	0	0	0	93	0	0	0	0	0	0	0	0
chr10	102894743	102895343	102894683	102894851	168	10	0	0				1																	60	0	108		0	0	0	108	0	0	0	0	0	0	0	0	0	0	0	0	0
chr10	102894743	102895343	102894684	102894797	113	1	6	0.857143														1							59	0	54		0	0	0	0	0	0	0	0	0	0	0	0	0	54	0	0	0
chr10	102894743	102895343	102894684	102894821	137	7	0	0										1											59	0	78		0	0	0	0	0	0	0	0	0	78	0	0	0	0	0	0	0
chr10	102894743	102895343	102894684	102894839	155	8	0	0								1													59	0	96		0	0	0	0	0	0	0	96	0	0	0	0	0	0	0	0	0
chr10	102894743	102895343	102894684	102894874	190	12	0	0													1								59	0	131		0	0	0	0	0	0	0	0	0	0	0	0	131	0	0	0	0
chr10	102894743	102895343	102894685	102894823	138	8	0	0												1									58	0	80		0	0	0	0	0	0	0	0	0	0	0	80	0	0	0	0	0
chr10	102894743	102895343	102894685	102894827	142	8	0	0																		1			58	0	84		0	0	0	0	0	0	0	0	0	0	0	0	0	0	0	0	0
chr10	102894743	102895343	102894685	102894835	150	6	1	0.142857													1								58	0	92		0	0	0	0	0	0	0	0	0	0	0	0	92	0	0	0	0
chr10	102894743	102895343	102894686	102894797	111	6	0	0																1					57	0	54		0	0	0	0	0	0	0	0	0	0	0	0	0	0	0	54	0
chr10	102894743	102895343	102894686	102894805	119	7	0	0															1						57	0	62		0	0	0	0	0	0	0	0	0	0	0	0	0	0	62	0	0
chr10	102894743	102895343	102894686	102894839	153	8	0	0					1																57	0	96		0	0	0	0	96	0	0	0	0	0	0	0	0	0	0	0	0
chr10	102894743	102895343	102894687	102894808	121	7	0	0													1								56	0	65		0	0	0	0	0	0	0	0	0	0	0	0	65	0	0	0	0
chr10	102894743	102895343	102894687	102894831	144	7	0	0																			1		56	0	88		0	0	0	0	0	0	0	0	0	0	0	0	0	0	0	0	0
chr10	102894743	102895343	102894687	102894836	149	7	0	0					1																56	0	93		0	0	0	0	93	0	0	0	0	0	0	0	0	0	0	0	0
chr10	102894743	102895343	102894687	102894839	152	7	0	0						1															56	0	96		0	0	0	0	0	96	0	0	0	0	0	0	0	0	0	0	0
chr10	102894743	102895343	102894687	102894841	154	6	1	0.142857							1														56	0	98		0	0	0	0	0	0	98	0	0	0	0	0	0	0	0	0	0
chr10	102894743	102895343	102894687	102894854	167	9	0	0						1															56	0	111		0	0	0	0	0	111	0	0	0	0	0	0	0	0	0	0	0
chr10	102894743	102895343	102894687	102894873	186	11	0	0				1																	56	0	130		0	0	0	130	0	0	0	0	0	0	0	0	0	0	0	0	0
chr10	102894743	102895343	102894688	102894851	163	9	0	0																1					55	0	108		0	0	0	0	0	0	0	0	0	0	0	0	0	0	0	108	0
chr10	102894743	102895343	102894689	102894774	85	5	0	0						1															54	0	31		0	0	0	0	0	31	0	0	0	0	0	0	0	0	0	0	0
chr10	102894743	102895343	102894689	102894815	126	6	0	0																	1				54	0	72		0	0	0	0	0	0	0	0	0	0	0	0	0	0	0	0	72
chr10	102894743	102895343	102894689	102894836	147	6	0	0												1									54	0	93		0	0	0	0	0	0	0	0	0	0	0	93	0	0	0	0	0
chr10	102894743	102895343	102894689	102894841	152	6	0	0																		1			54	0	98		0	0	0	0	0	0	0	0	0	0	0	0	0	0	0	0	0
chr10	102894743	102895343	102894689	102894864	175	10	0	0													1								54	0	121		0	0	0	0	0	0	0	0	0	0	0	0	121	0	0	0	0
chr10	102894743	102895343	102894690	102894845	155	7	0	0																		1			53	0	102		0	0	0	0	0	0	0	0	0	0	0	0	0	0	0	0	0
chr10	102894743	102895343	102894691	102894805	114	5	0	0																			1		52	0	62		0	0	0	0	0	0	0	0	0	0	0	0	0	0	0	0	0
chr10	102894743	102895343	102894691	102894836	145	6	0	0					1						1										52	0	93		0	0	0	0	93	0	0	0	0	0	93	0	0	0	0	0	0
chr10	102894743	102895343	102894692	102894837	145	5	0	0										1											51	0	94		0	0	0	0	0	0	0	0	0	94	0	0	0	0	0	0	0
chr10	102894743	102895343	102894693	102894814	121	5	0	0																		1			50	0	71		0	0	0	0	0	0	0	0	0	0	0	0	0	0	0	0	0
chr10	102894743	102895343	102894693	102894815	122	5	0	0			1																		50	0	72		0	0	72	0	0	0	0	0	0	0	0	0	0	0	0	0	0
chr10	102894743	102895343	102894693	102894817	124	4	1	0.2														1							50	0	74		0	0	0	0	0	0	0	0	0	0	0	0	0	74	0	0	0
chr10	102894743	102895343	102894693	102894852	159	7	0	0																			1		50	0	109		0	0	0	0	0	0	0	0	0	0	0	0	0	0	0	0	0
chr10	102894743	102895343	102894693	102894970	242	17	0	0										1											50	0	192		0	0	0	0	0	0	0	0	0	192	0	0	0	0	0	0	0
chr10	102894743	102895343	102894694	102894837	143	5	0	0											1										49	0	94		0	0	0	0	0	0	0	0	0	0	94	0	0	0	0	0	0
chr10	102894743	102895343	102894694	102894839	145	5	0	0																			1		49	0	96		0	0	0	0	0	0	0	0	0	0	0	0	0	0	0	0	0
chr10	102894743	102895343	102894695	102894814	119	4	1	0.2																1					48	0	71		0	0	0	0	0	0	0	0	0	0	0	0	0	0	0	71	0
chr10	102894743	102895343	102894695	102894814	119	5	0	0																		1			48	0	71		0	0	0	0	0	0	0	0	0	0	0	0	0	0	0	0	0
chr10	102894743	102895343	102894695	102894845	150	6	0	0								1													48	0	102		0	0	0	0	0	0	0	102	0	0	0	0	0	0	0	0	0
chr10	102894743	102895343	102894695	102894850	155	7	0	0										1											48	0	107		0	0	0	0	0	0	0	0	0	107	0	0	0	0	0	0	0
chr10	102894743	102895343	102894695	102894885	190	9	1	0.1																		1			48	0	142		0	0	0	0	0	0	0	0	0	0	0	0	0	0	0	0	0
chr10	102894743	102895343	102894696	102894817	121	5	0	0																			1		47	0	74		0	0	0	0	0	0	0	0	0	0	0	0	0	0	0	0	0
chr10	102894743	102895343	102894696	102894828	132	5	0	0													1								47	0	85		0	0	0	0	0	0	0	0	0	0	0	0	85	0	0	0	0
chr10	102894743	102895343	102894696	102894836	140	5	0	0								1							1						47	0	93		0	0	0	0	0	0	0	93	0	0	0	0	0	0	93	0	0
chr10	102894743	102895343	102894696	102894837	141	4	1	0.2																			1		47	0	94		0	0	0	0	0	0	0	0	0	0	0	0	0	0	0	0	0
chr10	102894743	102895343	102894696	102894866	170	9	0	0						1															47	0	123		0	0	0	0	0	123	0	0	0	0	0	0	0	0	0	0	0
chr10	102894743	102895343	102894697	102894827	130	5	0	0								1													46	0	84		0	0	0	0	0	0	0	84	0	0	0	0	0	0	0	0	0
chr10	102894743	102895343	102894697	102894834	137	5	0	0					1																46	0	91		0	0	0	0	91	0	0	0	0	0	0	0	0	0	0	0	0
chr10	102894743	102895343	102894697	102894835	138	4	0	0										1											46	0	92		0	0	0	0	0	0	0	0	0	92	0	0	0	0	0	0	0
chr10	102894743	102895343	102894697	102894836	139	5	0	0														1							46	0	93		0	0	0	0	0	0	0	0	0	0	0	0	0	93	0	0	0
chr10	102894743	102895343	102894697	102894850	153	6	0	0				1																	46	0	107		0	0	0	107	0	0	0	0	0	0	0	0	0	0	0	0	0
chr10	102894743	102895343	102894698	102894835	137	4	0	0									1												45	0	92		0	0	0	0	0	0	0	0	92	0	0	0	0	0	0	0	0
chr10	102894743	102895343	102894698	102894839	141	4	0	0			1																		45	0	96		0	0	96	0	0	0	0	0	0	0	0	0	0	0	0	0	0
chr10	102894743	102895343	102894698	102894851	153	6	0	0											1										45	0	108		0	0	0	0	0	0	0	0	0	0	108	0	0	0	0	0	0
chr10	102894743	102895343	102894698	102894865	167	8	0	0								1													45	0	122		0	0	0	0	0	0	0	122	0	0	0	0	0	0	0	0	0
chr10	102894743	102895343	102894699	102894836	137	4	0	0																		1			44	0	93		0	0	0	0	0	0	0	0	0	0	0	0	0	0	0	0	0
chr10	102894743	102895343	102894699	102894840	141	4	0	0						1															44	0	97		0	0	0	0	0	97	0	0	0	0	0	0	0	0	0	0	0
chr10	102894743	102895343	102894699	102894850	151	6	0	0																	1				44	0	107		0	0	0	0	0	0	0	0	0	0	0	0	0	0	0	0	107
chr10	102894743	102895343	102894699	102894861	162	8	0	0												1									44	0	118		0	0	0	0	0	0	0	0	0	0	0	118	0	0	0	0	0
chr10	102894743	102895343	102894699	102894990	240	15	0	0											1										44	0	196		0	0	0	0	0	0	0	0	0	0	196	0	0	0	0	0	0
chr10	102894743	102895343	102894700	102894805	105	3	0	0																			1		43	0	62		0	0	0	0	0	0	0	0	0	0	0	0	0	0	0	0	0
chr10	102894743	102895343	102894700	102894821	121	4	0	0										1											43	0	78		0	0	0	0	0	0	0	0	0	78	0	0	0	0	0	0	0
chr10	102894743	102895343	102894700	102894850	150	5	0	0			1																		43	0	107		0	0	107	0	0	0	0	0	0	0	0	0	0	0	0	0	0
chr10	102894743	102895343	102894700	102894855	155	6	0	0										1											43	0	112		0	0	0	0	0	0	0	0	0	112	0	0	0	0	0	0	0
chr10	102894743	102895343	102894701	102894834	133	3	0	0												1									42	0	91		0	0	0	0	0	0	0	0	0	0	0	91	0	0	0	0	0
chr10	102894743	102895343	102894701	102894851	150	5	0	0							1										1				42	0	108		0	0	0	0	0	0	108	0	0	0	0	0	0	0	0	0	108
chr10	102894743	102895343	102894701	102894853	152	3	2	0.4		1																			42	0	110		0	110	0	0	0	0	0	0	0	0	0	0	0	0	0	0	0
chr10	102894743	102895343	102894701	102894854	153	6	0	0				1																	42	0	111		0	0	0	111	0	0	0	0	0	0	0	0	0	0	0	0	0
chr10	102894743	102895343	102894701	102894857	156	6	0	0						1															42	0	114		0	0	0	0	0	114	0	0	0	0	0	0	0	0	0	0	0
chr10	102894743	102895343	102894702	102894833	131	3	0	0														1							41	0	90		0	0	0	0	0	0	0	0	0	0	0	0	0	90	0	0	0
chr10	102894743	102895343	102894702	102894836	134	3	0	0			1													1					41	0	93		0	0	93	0	0	0	0	0	0	0	0	0	0	0	0	93	0
chr10	102894743	102895343	102894702	102894853	151	6	0	0																		1			41	0	110		0	0	0	0	0	0	0	0	0	0	0	0	0	0	0	0	0
chr10	102894743	102895343	102894702	102894855	153	6	0	0																		1			41	0	112		0	0	0	0	0	0	0	0	0	0	0	0	0	0	0	0	0
chr10	102894743	102895343	102894703	102894836	133	3	0	0										1			1								40	0	93		0	0	0	0	0	0	0	0	0	93	0	0	93	0	0	0	0
chr10	102894743	102895343	102894703	102894996	240	13	0	0										1											40	0	200		0	0	0	0	0	0	0	0	0	200	0	0	0	0	0	0	0
chr10	102894743	102895343	102894704	102894836	132	3	0	0					1																39	0	93		0	0	0	0	93	0	0	0	0	0	0	0	0	0	0	0	0
chr10	102894743	102895343	102894704	102894842	138	3	0	0			1																		39	0	99		0	0	99	0	0	0	0	0	0	0	0	0	0	0	0	0	0
chr10	102894743	102895343	102894704	102895019	241	10	0	0							1														39	0	202		0	0	0	0	0	0	202	0	0	0	0	0	0	0	0	0	0
chr10	102894743	102895343	102894705	102894806	101	2	1	0.333333												1									38	0	63		0	0	0	0	0	0	0	0	0	0	0	63	0	0	0	0	0
chr10	102894743	102895343	102894706	102894805	99	3	0	0									1												37	0	62		0	0	0	0	0	0	0	0	62	0	0	0	0	0	0	0	0
chr10	102894743	102895343	102894706	102894807	101	2	0	0						1															37	0	64		0	0	0	0	0	64	0	0	0	0	0	0	0	0	0	0	0
chr10	102894743	102895343	102894706	102894950	240	15	0	0																			1		37	0	203		0	0	0	0	0	0	0	0	0	0	0	0	0	0	0	0	0
chr10	102894743	102895343	102894707	102894840	133	3	0	0				1																	36	0	97		0	0	0	97	0	0	0	0	0	0	0	0	0	0	0	0	0
chr10	102894743	102895343	102894707	102894852	145	5	0	0												1									36	0	109		0	0	0	0	0	0	0	0	0	0	0	109	0	0	0	0	0
chr10	102894743	102895343	102894707	102894874	167	7	0	0													1								36	0	131		0	0	0	0	0	0	0	0	0	0	0	0	131	0	0	0	0
chr10	102894743	102895343	102894708	102894849	141	4	0	0											1										35	0	106		0	0	0	0	0	0	0	0	0	0	106	0	0	0	0	0	0
chr10	102894743	102895343	102894709	102894854	145	5	0	0			1																		34	0	111		0	0	111	0	0	0	0	0	0	0	0	0	0	0	0	0	0
chr10	102894743	102895343	102894710	102894834	124	1	0	0		1																			33	0	91		0	91	0	0	0	0	0	0	0	0	0	0	0	0	0	0	0
chr10	102894743	102895343	102894710	102894845	135	3	0	0								1													33	0	102		0	0	0	0	0	0	0	102	0	0	0	0	0	0	0	0	0
chr10	102894743	102895343	102894711	102894832	121	1	0	0		1																			32	0	89		0	89	0	0	0	0	0	0	0	0	0	0	0	0	0	0	0
chr10	102894743	102895343	102894712	102894832	120	1	0	0	1						1														31	0	89		89	0	0	0	0	0	89	0	0	0	0	0	0	0	0	0	0
chr10	102894743	102895343	102894712	102894833	121	1	0	0							1														31	0	90		0	0	0	0	0	0	90	0	0	0	0	0	0	0	0	0	0
chr10	102894743	102895343	102894712	102894848	136	2	0	0							1														31	0	105		0	0	0	0	0	0	105	0	0	0	0	0	0	0	0	0	0
chr10	102894743	102895343	102894712	102894856	144	3	1	0.25												1									31	0	113		0	0	0	0	0	0	0	0	0	0	0	113	0	0	0	0	0
chr10	102894743	102895343	102894713	102894849	136	3	0	0				1																	30	0	106		0	0	0	106	0	0	0	0	0	0	0	0	0	0	0	0	0
chr10	102894743	102895343	102894714	102894859	145	4	0	0														1							29	0	116		0	0	0	0	0	0	0	0	0	0	0	0	0	116	0	0	0
chr10	102894743	102895343	102894714	102894860	146	3	2	0.4					1																29	0	117		0	0	0	0	117	0	0	0	0	0	0	0	0	0	0	0	0
chr10	102894743	102895343	102894714	102894878	164	6	0	0																			1		29	0	135		0	0	0	0	0	0	0	0	0	0	0	0	0	0	0	0	0
chr10	102894743	102895343	102894715	102894836	121	1	0	0			1								1										28	0	93		0	0	93	0	0	0	0	0	0	0	93	0	0	0	0	0	0
chr10	102894743	102895343	102894715	102894938	223	12	0	0							1														28	0	195		0	0	0	0	0	0	195	0	0	0	0	0	0	0	0	0	0
chr10	102894743	102895343	102894716	102894837	121	1	0	0																			1		27	0	94		0	0	0	0	0	0	0	0	0	0	0	0	0	0	0	0	0
chr10	102894743	102895343	102894718	102894851	133	3	0	0																1					25	0	108		0	0	0	0	0	0	0	0	0	0	0	0	0	0	0	108	0
chr10	102894743	102895343	102894718	102894863	145	4	1	0.2																	1				25	0	120		0	0	0	0	0	0	0	0	0	0	0	0	0	0	0	0	120
chr10	102894743	102895343	102894719	102894836	145	4	0	0														1							24	0	121		0	0	0	0	0	0	0	0	0	0	0	0	0	121	0	0	0
chr10	102894743	102895343	102894719	102894855	136	4	0	0									1												24	0	112		0	0	0	0	0	0	0	0	112	0	0	0	0	0	0	0	0
chr10	102894743	102895343	102894720	102894840	120	1	0	0																		1			23	0	97		0	0	0	0	0	0	0	0	0	0	0	0	0	0	0	0	0
chr10	102894743	102895343	102894720	102894870	150	5	0	0																1					23	0	127		0	0	0	0	0	0	0	0	0	0	0	0	0	0	0	127	0
chr10	102894743	102895343	102894721	102894834	113	1	0	0	1																				22	0	91		91	0	0	0	0	0	0	0	0	0	0	0	0	0	0	0	0
chr10	102894743	102895343	102894721	102894928	207	11	0	0																		1			22	0	185		0	0	0	0	0	0	0	0	0	0	0	0	0	0	0	0	0
chr10	102894743	102895343	102894722	102895056	239	13	0	0	1																				21	0	218		218	0	0	0	0	0	0	0	0	0	0	0	0	0	0	0	0
chr10	102894743	102895343	102894723	102894865	142	5	0	0																1					20	0	122		0	0	0	0	0	0	0	0	0	0	0	0	0	0	0	122	0
chr10	102894743	102895343	102894724	102894855	131	4	0	0																		1			19	0	112		0	0	0	0	0	0	0	0	0	0	0	0	0	0	0	0	0
chr10	102894743	102895343	102894724	102894867	143	5	0	0								1													19	0	124		0	0	0	0	0	0	0	124	0	0	0	0	0	0	0	0	0
chr10	102894743	102895343	102894724	102894872	148	5	0	0																1					19	0	129		0	0	0	0	0	0	0	0	0	0	0	0	0	0	0	129	0
chr10	102894743	102895343	102894724	102894887	163	6	0	0										1											19	0	144		0	0	0	0	0	0	0	0	0	144	0	0	0	0	0	0	0
chr10	102894743	102895343	102894724	102894898	174	9	0	0																			1		19	0	155		0	0	0	0	0	0	0	0	0	0	0	0	0	0	0	0	0
chr10	102894743	102895343	102894725	102894860	135	4	0	0						1															18	0	117		0	0	0	0	0	117	0	0	0	0	0	0	0	0	0	0	0
chr10	102894743	102895343	102894725	102894865	140	5	0	0																		1			18	0	122		0	0	0	0	0	0	0	0	0	0	0	0	0	0	0	0	0
chr10	102894743	102895343	102894725	102894888	163	6	0	0				1																	18	0	145		0	0	0	145	0	0	0	0	0	0	0	0	0	0	0	0	0
chr10	102894743	102895343	102894726	102894849	123	2	0	0						1															17	0	106		0	0	0	0	0	106	0	0	0	0	0	0	0	0	0	0	0
chr10	102894743	102895343	102894726	102894851	125	3	0	0																	1				17	0	108		0	0	0	0	0	0	0	0	0	0	0	0	0	0	0	0	108
chr10	102894743	102895343	102894726	102894859	133	1	3	0.75												1									17	0	116		0	0	0	0	0	0	0	0	0	0	0	116	0	0	0	0	0
chr10	102894743	102895343	102894726	102894861	135	5	0	0				1																	17	0	118		0	0	0	118	0	0	0	0	0	0	0	0	0	0	0	0	0
chr10	102894743	102895343	102894726	102894869	143	5	0	0				1																	17	0	126		0	0	0	126	0	0	0	0	0	0	0	0	0	0	0	0	0
chr10	102894743	102895343	102894727	102894872	145	5	0	0				1																	16	0	129		0	0	0	129	0	0	0	0	0	0	0	0	0	0	0	0	0
chr10	102894743	102895343	102894730	102894839	109	1	0	0															1						13	0	96		0	0	0	0	0	0	0	0	0	0	0	0	0	0	96	0	0
chr10	102894743	102895343	102894730	102894850	120	3	0	0																		1			13	0	107		0	0	0	0	0	0	0	0	0	0	0	0	0	0	0	0	0
chr10	102894743	102895343	102894731	102894870	139	5	0	0														1							12	0	127		0	0	0	0	0	0	0	0	0	0	0	0	0	127	0	0	0
chr10	102894743	102895343	102894731	102894873	142	5	0	0																1					12	0	130		0	0	0	0	0	0	0	0	0	0	0	0	0	0	0	130	0
chr10	102894743	102895343	102894732	102894867	135	5	0	0				1																	11	0	124		0	0	0	124	0	0	0	0	0	0	0	0	0	0	0	0	0
chr10	102894743	102895343	102894732	102894881	149	6	0	0							1														11	0	138		0	0	0	0	0	0	138	0	0	0	0	0	0	0	0	0	0
chr10	102894743	102895343	102894733	102894804	71	1	0	0										1											10	0	61		0	0	0	0	0	0	0	0	0	61	0	0	0	0	0	0	0
chr10	102894743	102895343	102894733	102894873	140	5	0	0																		1			10	0	130		0	0	0	0	0	0	0	0	0	0	0	0	0	0	0	0	0
chr10	102894743	102895343	102894733	102895111	239	13	0	0																	1				10	0	229		0	0	0	0	0	0	0	0	0	0	0	0	0	0	0	0	229
chr10	102894743	102895343	102894734	102894915	181	11	0	0															1						9	0	172		0	0	0	0	0	0	0	0	0	0	0	0	0	0	172	0	0
chr10	102894743	102895343	102894735	102894855	120	4	0	0															1						8	0	112		0	0	0	0	0	0	0	0	0	0	0	0	0	0	112	0	0
chr10	102894743	102895343	102894735	102894872	137	5	0	0				1																	8	0	129		0	0	0	129	0	0	0	0	0	0	0	0	0	0	0	0	0
chr10	102894743	102895343	102894735	102894898	163	9	0	0															1						8	0	155		0	0	0	0	0	0	0	0	0	0	0	0	0	0	155	0	0
chr10	102894743	102895343	102894736	102894845	109	2	0	0																	1				7	0	102		0	0	0	0	0	0	0	0	0	0	0	0	0	0	0	0	102
chr10	102894743	102895343	102894736	102894884	148	6	0	0																			1		7	0	141		0	0	0	0	0	0	0	0	0	0	0	0	0	0	0	0	0
chr10	102894743	102895343	102894738	102894849	111	3	0	0															1						5	0	106		0	0	0	0	0	0	0	0	0	0	0	0	0	0	106	0	0
chr10	102894743	102895343	102894738	102894855	117	4	0	0													1								5	0	112		0	0	0	0	0	0	0	0	0	0	0	0	112	0	0	0	0
chr10	102894743	102895343	102894738	102894872	134	5	0	0																	1				5	0	129		0	0	0	0	0	0	0	0	0	0	0	0	0	0	0	0	129
chr10	102894743	102895343	102894739	102894864	125	4	1	0.2												1									4	0	121		0	0	0	0	0	0	0	0	0	0	0	121	0	0	0	0	0
chr10	102894743	102895343	102894739	102894872	133	5	0	0															1						4	0	129		0	0	0	0	0	0	0	0	0	0	0	0	0	0	129	0	0
chr10	102894743	102895343	102894739	102894877	138	3	3	0.5												1									4	0	134		0	0	0	0	0	0	0	0	0	0	0	134	0	0	0	0	0
chr10	102894743	102895343	102894739	102894877	138	5	0	0				1																	4	0	134		0	0	0	134	0	0	0	0	0	0	0	0	0	0	0	0	0
chr10	102894743	102895343	102894739	102894895	156	8	0	0																	1				4	0	152		0	0	0	0	0	0	0	0	0	0	0	0	0	0	0	0	152
chr10	102894743	102895343	102894740	102894849	109	3	0	0			1																		3	0	106		0	0	106	0	0	0	0	0	0	0	0	0	0	0	0	0	0
chr10	102894743	102895343	102894740	102894879	139	5	0	0			1																		3	0	136		0	0	136	0	0	0	0	0	0	0	0	0	0	0	0	0	0
chr10	102894743	102895343	102894741	102894863	122	5	0	0															1						2	0	120		0	0	0	0	0	0	0	0	0	0	0	0	0	0	120	0	0
chr10	102894743	102895343	102894741	102894870	129	5	0	0								1													2	0	127		0	0	0	0	0	0	0	127	0	0	0	0	0	0	0	0	0
chr10	102894743	102895343	102894745	102894883	138	6	0	0																		1			0	0	138		0	0	0	0	0	0	0	0	0	0	0	0	0	0	0	0	0
chr10	102894743	102895343	102894746	102894875	129	6	0	0			1																		0	0	129		0	0	129	0	0	0	0	0	0	0	0	0	0	0	0	0	0
chr10	102894743	102895343	102894747	102894918	171	11	0	0													1								0	0	171		0	0	0	0	0	0	0	0	0	0	0	0	171	0	0	0	0
chr10	102894743	102895343	102894748	102894869	121	5	0	0																		1			0	0	121		0	0	0	0	0	0	0	0	0	0	0	0	0	0	0	0	0
chr10	102894743	102895343	102894748	102894891	143	4	2	0.333333												1									0	0	143		0	0	0	0	0	0	0	0	0	0	0	143	0	0	0	0	0
chr10	102894743	102895343	102894748	102894910	162	10	0	0							1														0	0	162		0	0	0	0	0	0	162	0	0	0	0	0	0	0	0	0	0
chr10	102894743	102895343	102894748	102894930	182	11	0	0			1																		0	0	182		0	0	182	0	0	0	0	0	0	0	0	0	0	0	0	0	0
chr10	102894743	102895343	102894750	102894883	133	6	0	0										1											0	0	133		0	0	0	0	0	0	0	0	0	133	0	0	0	0	0	0	0
chr10	102894743	102895343	102894750	102894892	142	7	0	0								1													0	0	142		0	0	0	0	0	0	0	142	0	0	0	0	0	0	0	0	0
chr10	102894743	102895343	102894750	102894899	149	9	0	0																	1				0	0	149		0	0	0	0	0	0	0	0	0	0	0	0	0	0	0	0	149
chr10	102894743	102895343	102894751	102894862	111	4	1	0.2														1							0	0	111		0	0	0	0	0	0	0	0	0	0	0	0	0	111	0	0	0
chr10	102894743	102895343	102894751	102894872	121	5	0	0													1								0	0	121		0	0	0	0	0	0	0	0	0	0	0	0	121	0	0	0	0
chr10	102894743	102895343	102894751	102894874	123	5	0	0					1																0	0	123		0	0	0	0	123	0	0	0	0	0	0	0	0	0	0	0	0
chr10	102894743	102895343	102894752	102894891	139	4	0	0														1							0	0	139		0	0	0	0	0	0	0	0	0	0	0	0	0	139	0	0	0
chr10	102894743	102895343	102894752	102894936	184	12	0	0						1															0	0	184		0	0	0	0	0	184	0	0	0	0	0	0	0	0	0	0	0
chr10	102894743	102895343	102894753	102894902	149	10	0	0																	1				0	0	149		0	0	0	0	0	0	0	0	0	0	0	0	0	0	0	0	149
chr10	102894743	102895343	102894756	102895051	242	18	0	0						1															0	0	242		0	0	0	0	0	242	0	0	0	0	0	0	0	0	0	0	0
chr10	102894743	102895343	102894757	102894999	241	16	0	0	1																				0	0	241		241	0	0	0	0	0	0	0	0	0	0	0	0	0	0	0	0
chr10	102894743	102895343	102894758	102894833	75	1	0	0	1																				0	0	75		75	0	0	0	0	0	0	0	0	0	0	0	0	0	0	0	0
chr10	102894743	102895343	102894758	102894890	132	6	0	0																			1		0	0	132		0	0	0	0	0	0	0	0	0	0	0	0	0	0	0	0	0
chr10	102894743	102895343	102894760	102895001	239	12	4	0.25		1																			0	0	239		0	239	0	0	0	0	0	0	0	0	0	0	0	0	0	0	0
chr10	102894743	102895343	102894761	102894895	134	8	0	0																1					0	0	134		0	0	0	0	0	0	0	0	0	0	0	0	0	0	0	134	0
chr10	102894743	102895343	102894764	102894834	70	1	0	0		1																			0	0	70		0	70	0	0	0	0	0	0	0	0	0	0	0	0	0	0	0
chr10	102894743	102895343	102894765	102895011	242	16	0	0		1																			0	0	242		0	242	0	0	0	0	0	0	0	0	0	0	0	0	0	0	0
chr10	102894743	102895343	102894765	102895057	241	18	0	0	1																				0	0	241		241	0	0	0	0	0	0	0	0	0	0	0	0	0	0	0	0
chr10	102894743	102895343	102894766	102895002	114	4	0	0		1																			0	0	114		0	114	0	0	0	0	0	0	0	0	0	0	0	0	0	0	0
chr10	102894743	102895343	102894767	102894871	104	5	0	0												1									0	0	104		0	0	0	0	0	0	0	0	0	0	0	104	0	0	0	0	0
chr10	102894743	102895343	102894768	102894913	145	11	0	0								1													0	0	145		0	0	0	0	0	0	0	145	0	0	0	0	0	0	0	0	0
chr10	102894743	102895343	102894769	102894898	129	8	1	0.111111												1									0	0	129		0	0	0	0	0	0	0	0	0	0	0	129	0	0	0	0	0
chr10	102894743	102895343	102894769	102894901	132	8	0	0												1									0	0	132		0	0	0	0	0	0	0	0	0	0	0	132	0	0	0	0	0
chr10	102894743	102895343	102894771	102894910	139	8	2	0.2												1									0	0	139		0	0	0	0	0	0	0	0	0	0	0	139	0	0	0	0	0
chr10	102894743	102895343	102894773	102894894	121	8	0	0																1					0	0	121		0	0	0	0	0	0	0	0	0	0	0	0	0	0	0	121	0
chr10	102894743	102895343	102894781	102894901	120	9	0	0													1								0	0	120		0	0	0	0	0	0	0	0	0	0	0	0	120	0	0	0	0
chr10	102894743	102895343	102894781	102894912	131	7	3	0.3														1							0	0	131		0	0	0	0	0	0	0	0	0	0	0	0	0	131	0	0	0
chr10	102894743	102895343	102894782	102894938	156	11	1	0.0833333				1																	0	0	156		0	0	0	156	0	0	0	0	0	0	0	0	0	0	0	0	0
chr10	102894743	102895343	102894783	102894927	144	11	0	0				1																	0	0	144		0	0	0	144	0	0	0	0	0	0	0	0	0	0	0	0	0
chr10	102894743	102895343	102894784	102894910	126	10	0	0						1															0	0	126		0	0	0	0	0	126	0	0	0	0	0	0	0	0	0	0	0
chr10	102894743	102895343	102894786	102894926	140	1	10	0.909091							1														0	0	140		0	0	0	0	0	0	140	0	0	0	0	0	0	0	0	0	0
chr10	102894743	102895343	102894788	102894897	109	8	1	0.111111																			1		0	0	109		0	0	0	0	0	0	0	0	0	0	0	0	0	0	0	0	0
chr10	102894743	102895343	102894788	102894910	122	7	3	0.3														1							0	0	122		0	0	0	0	0	0	0	0	0	0	0	0	0	122	0	0	0
chr10	102894743	102895343	102894788	102895050	241	21	0	0						1															0	0	241		0	0	0	0	0	241	0	0	0	0	0	0	0	0	0	0	0
chr10	102894743	102895343	102894790	102894912	122	9	1	0.1												1									0	0	122		0	0	0	0	0	0	0	0	0	0	0	122	0	0	0	0	0
chr10	102894743	102895343	102894792	102894882	90	1	4	0.8		1																			0	0	90		0	90	0	0	0	0	0	0	0	0	0	0	0	0	0	0	0
chr10	102894743	102895343	102894792	102894887	95	4	2	0.333333	1																				0	0	95		95	0	0	0	0	0	0	0	0	0	0	0	0	0	0	0	0
chr10	102894743	102895343	102894792	102894902	110	8	1	0.111111	1																				0	0	110		110	0	0	0	0	0	0	0	0	0	0	0	0	0	0	0	0
chr10	102894743	102895343	102894792	102894904	112	5	4	0.444444		1																			0	0	112		0	112	0	0	0	0	0	0	0	0	0	0	0	0	0	0	0
chr10	102894743	102895343	102894792	102894911	119	10	0	0	1																				0	0	119		119	0	0	0	0	0	0	0	0	0	0	0	0	0	0	0	0
chr10	102894743	102895343	102894792	102894912	120	6	4	0.4		1																			0	0	120		0	120	0	0	0	0	0	0	0	0	0	0	0	0	0	0	0
chr10	102894743	102895343	102894792	102894919	127	8	3	0.272727		1																			0	0	127		0	127	0	0	0	0	0	0	0	0	0	0	0	0	0	0	0
chr10	102894743	102895343	102894792	102894922	130	9	2	0.181818		1																			0	0	130		0	130	0	0	0	0	0	0	0	0	0	0	0	0	0	0	0
chr10	102894743	102895343	102894792	102894923	131	11	0	0		1																			0	0	131		0	131	0	0	0	0	0	0	0	0	0	0	0	0	0	0	0
chr10	102894743	102895343	102894792	102894926	134	11	0	0																		1			0	0	134		0	0	0	0	0	0	0	0	0	0	0	0	0	0	0	0	0
chr10	102894743	102895343	102894792	102894948	156	9	3	0.25		1																			0	0	156		0	156	0	0	0	0	0	0	0	0	0	0	0	0	0	0	0
chr10	102894743	102895343	102894792	102894949	157	8	5	0.384615		1																			0	0	157		0	157	0	0	0	0	0	0	0	0	0	0	0	0	0	0	0
chr10	102894743	102895343	102894792	102894950	158	13	0	0		1																			0	0	158		0	158	0	0	0	0	0	0	0	0	0	0	0	0	0	0	0
chr10	102894743	102895343	102894792	102894968	176	14	0	0		1																			0	0	176		0	176	0	0	0	0	0	0	0	0	0	0	0	0	0	0	0
chr10	102894743	102895343	102894792	102894970	178	13	1	0.0714286	1																				0	0	178		178	0	0	0	0	0	0	0	0	0	0	0	0	0	0	0	0
chr10	102894743	102895343	102894792	102895127	240	11	10	0.47619		1																			0	0	240		0	240	0	0	0	0	0	0	0	0	0	0	0	0	0	0	0
chr10	102894743	102895343	102894793	102894860	67	3	2	0.4												1									0	0	67		0	0	0	0	0	0	0	0	0	0	0	67	0	0	0	0	0
chr10	102894743	102895343	102894793	102894870	77	5	0	0												1									0	0	77		0	0	0	0	0	0	0	0	0	0	0	77	0	0	0	0	0
chr10	102894743	102895343	102894793	102894942	149	12	0	0												1									0	0	149		0	0	0	0	0	0	0	0	0	0	0	149	0	0	0	0	0
chr10	102894743	102895343	102894794	102894921	127	11	0	0					1																0	0	127		0	0	0	0	127	0	0	0	0	0	0	0	0	0	0	0	0
chr10	102894743	102895343	102894794	102894931	137	12	0	0															1						0	0	137		0	0	0	0	0	0	0	0	0	0	0	0	0	0	137	0	0
chr10	102894743	102895343	102894799	102894903	104	9	0	0	1																				0	0	104		104	0	0	0	0	0	0	0	0	0	0	0	0	0	0	0	0
chr10	102894743	102895343	102894799	102894924	125	11	0	0																1					0	0	125		0	0	0	0	0	0	0	0	0	0	0	0	0	0	0	125	0
chr10	102894743	102895343	102894802	102894887	85	2	4	0.666667	1																				0	0	85		85	0	0	0	0	0	0	0	0	0	0	0	0	0	0	0	0
chr10	102894743	102895343	102894806	102894961	155	11	1	0.0833333										1											0	0	155		0	0	0	0	0	0	0	0	0	155	0	0	0	0	0	0	0
chr10	102894743	102895343	102894807	102894950	143	12	0	0																	1				0	0	143		0	0	0	0	0	0	0	0	0	0	0	0	0	0	0	0	143
chr10	102894743	102895343	102894810	102894938	128	11	0	0						1															0	0	128		0	0	0	0	0	128	0	0	0	0	0	0	0	0	0	0	0
chr10	102894743	102895343	102894810	102894951	141	9	3	0.25							1														0	0	141		0	0	0	0	0	0	141	0	0	0	0	0	0	0	0	0	0
chr10	102894743	102895343	102894811	102895099	241	21	0	0					1																0	0	241		0	0	0	0	241	0	0	0	0	0	0	0	0	0	0	0	0
chr10	102894743	102895343	102894814	102895071	240	16	7	0.304348												1									0	0	240		0	0	0	0	0	0	0	0	0	0	0	240	0	0	0	0	0
chr10	102894743	102895343	102894818	102894934	116	11	0	0					1																0	0	116		0	0	0	0	116	0	0	0	0	0	0	0	0	0	0	0	0
chr10	102894743	102895343	102894819	102894942	123	11	0	0										1											0	0	123		0	0	0	0	0	0	0	0	0	123	0	0	0	0	0	0	0
chr10	102894743	102895343	102894819	102895002	183	15	0	0	1																				0	0	183		183	0	0	0	0	0	0	0	0	0	0	0	0	0	0	0	0
chr10	102894743	102895343	102894821	102894970	149	12	0	0			1																		0	0	149		0	0	149	0	0	0	0	0	0	0	0	0	0	0	0	0	0
chr10	102894743	102895343	102894822	102895097	240	22	0	0							1														0	0	240		0	0	0	0	0	0	240	0	0	0	0	0	0	0	0	0	0
chr10	102894743	102895343	102894830	102894918	88	10	0	0																	1				0	0	88		0	0	0	0	0	0	0	0	0	0	0	0	0	0	0	0	88
chr10	102894743	102895343	102894830	102894950	120	12	0	0																			1		0	0	120		0	0	0	0	0	0	0	0	0	0	0	0	0	0	0	0	0
chr10	102894743	102895343	102894851	102895008	157	13	0	0			1																		0	0	157		0	0	157	0	0	0	0	0	0	0	0	0	0	0	0	0	0
chr10	102894743	102895343	102894855	102894973	118	9	1	0.1											1										0	0	118		0	0	0	0	0	0	0	0	0	0	118	0	0	0	0	0	0
chr10	102894743	102895343	102894855	102894990	135	12	0	0										1											0	0	135		0	0	0	0	0	0	0	0	0	135	0	0	0	0	0	0	0
chr10	102894743	102895343	102894857	102894995	138	11	1	0.0833333											1										0	0	138		0	0	0	0	0	0	0	0	0	0	138	0	0	0	0	0	0
chr10	102894743	102895343	102894858	102894917	59	7	0	0														1							0	0	59		0	0	0	0	0	0	0	0	0	0	0	0	0	59	0	0	0
chr10	102894743	102895343	102894860	102894989	129	12	0	0							1														0	0	129		0	0	0	0	0	0	129	0	0	0	0	0	0	0	0	0	0
chr10	102894743	102895343	102894860	102895001	141	11	0	0		1																			0	0	141		0	141	0	0	0	0	0	0	0	0	0	0	0	0	0	0	0
chr10	102894743	102895343	102894869	102895060	191	20	0	0											1										0	0	191		0	0	0	0	0	0	0	0	0	0	191	0	0	0	0	0	0
chr10	102894743	102895343	102894874	102895206	241	17	0	0																		1			0	0	241		0	0	0	0	0	0	0	0	0	0	0	0	0	0	0	0	0
chr10	102894743	102895343	102894876	102895032	156	12	0	0							1														0	0	156		0	0	0	0	0	0	156	0	0	0	0	0	0	0	0	0	0
chr10	102894743	102895343	102894877	102895018	141	10	0	0										1											0	0	141		0	0	0	0	0	0	0	0	0	141	0	0	0	0	0	0	0
chr10	102894743	102895343	102894878	102895016	138	10	0	0													1								0	0	138		0	0	0	0	0	0	0	0	0	0	0	0	138	0	0	0	0
chr10	102894743	102895343	102894879	102894997	138	3	0	0			1																		0	0	138		0	0	138	0	0	0	0	0	0	0	0	0	0	0	0	0	0
chr10	102894743	102895343	102894879	102895028	149	12	0	0											1										0	0	149		0	0	0	0	0	0	0	0	0	0	149	0	0	0	0	0	0
chr10	102894743	102895343	102894879	102895041	162	13	0	0																		1			0	0	162		0	0	0	0	0	0	0	0	0	0	0	0	0	0	0	0	0
chr10	102894743	102895343	102894884	102895204	241	16	0	0											1										0	0	241		0	0	0	0	0	0	0	0	0	0	241	0	0	0	0	0	0
chr10	102894743	102895343	102894889	102894984	95	10	0	0	1																				0	0	95		95	0	0	0	0	0	0	0	0	0	0	0	0	0	0	0	0
chr10	102894743	102895343	102894889	102895009	120	10	0	0		1																			0	0	120		0	120	0	0	0	0	0	0	0	0	0	0	0	0	0	0	0
chr10	102894743	102895343	102894893	102895012	119	9	0	0														1							0	0	119		0	0	0	0	0	0	0	0	0	0	0	0	0	119	0	0	0
chr10	102894743	102895343	102894898	102895012	114	7	0	0										1											0	0	114		0	0	0	0	0	0	0	0	0	114	0	0	0	0	0	0	0
chr10	102894743	102895343	102894899	102894982	83	6	0	0	1																				0	0	83		83	0	0	0	0	0	0	0	0	0	0	0	0	0	0	0	0
chr10	102894743	102895343	102894901	102895022	121	9	0	0		1																			0	0	121		0	121	0	0	0	0	0	0	0	0	0	0	0	0	0	0	0
chr10	102894743	102895343	102894903	102894954	51	4	0	0		1																			0	0	51		0	51	0	0	0	0	0	0	0	0	0	0	0	0	0	0	0
chr10	102894743	102895343	102894903	102895021	118	8	0	0		1																			0	0	118		0	118	0	0	0	0	0	0	0	0	0	0	0	0	0	0	0
chr10	102894743	102895343	102894905	102894983	78	5	0	0	1																				0	0	78		78	0	0	0	0	0	0	0	0	0	0	0	0	0	0	0	0
chr10	102894743	102895343	102894905	102895001	96	5	1	0.166667		1																			0	0	96		0	96	0	0	0	0	0	0	0	0	0	0	0	0	0	0	0
chr10	102894743	102895343	102894905	102895001	96	6	0	0	1																				0	0	96		96	0	0	0	0	0	0	0	0	0	0	0	0	0	0	0	0
chr10	102894743	102895343	102894906	102894965	59	4	0	0	1																				0	0	59		59	0	0	0	0	0	0	0	0	0	0	0	0	0	0	0	0
chr10	102894743	102895343	102894906	102895272	239	13	0	0		1																			0	0	239		0	239	0	0	0	0	0	0	0	0	0	0	0	0	0	0	0
chr10	102894743	102895343	102894907	102894935	28	2	0	0		1																			0	0	28		0	28	0	0	0	0	0	0	0	0	0	0	0	0	0	0	0
chr10	102894743	102895343	102894907	102894948	41	2	0	0		1																			0	0	41		0	41	0	0	0	0	0	0	0	0	0	0	0	0	0	0	0
chr10	102894743	102895343	102894912	102894965	53	4	0	0		1																			0	0	53		0	53	0	0	0	0	0	0	0	0	0	0	0	0	0	0	0
chr10	102894743	102895343	102894915	102895056	141	9	4	0.307692		1																			0	0	141		0	141	0	0	0	0	0	0	0	0	0	0	0	0	0	0	0
chr10	102894743	102895343	102894920	102895065	145	14	0	0																1					0	0	145		0	0	0	0	0	0	0	0	0	0	0	0	0	0	0	145	0
chr10	102894743	102895343	102894920	102895095	175	4	10	0.714286	1																				0	0	175		175	0	0	0	0	0	0	0	0	0	0	0	0	0	0	0	0
chr10	102894743	102895343	102894927	102895001	74	5	0	0	1																				0	0	74		74	0	0	0	0	0	0	0	0	0	0	0	0	0	0	0	0
chr10	102894743	102895343	102894928	102895056	128	8	5	0.384615		1																			0	0	128		0	128	0	0	0	0	0	0	0	0	0	0	0	0	0	0	0
chr10	102894743	102895343	102894930	102895212	241	17	0	0								1													0	0	241		0	0	0	0	0	0	0	241	0	0	0	0	0	0	0	0	0
chr10	102894743	102895343	102894932	102894962	30	1	1	0.5		1																			0	0	30		0	30	0	0	0	0	0	0	0	0	0	0	0	0	0	0	0
chr10	102894743	102895343	102894932	102894972	40	1	1	0.5		1																			0	0	40		0	40	0	0	0	0	0	0	0	0	0	0	0	0	0	0	0
chr10	102894743	102895343	102894932	102894983	51	3	0	0	1																				0	0	51		51	0	0	0	0	0	0	0	0	0	0	0	0	0	0	0	0
chr10	102894743	102895343	102894932	102895001	69	4	0	0	1																				0	0	69		69	0	0	0	0	0	0	0	0	0	0	0	0	0	0	0	0
chr10	102894743	102895343	102894932	102895008	76	4	0	0		1																			0	0	76		0	76	0	0	0	0	0	0	0	0	0	0	0	0	0	0	0
chr10	102894743	102895343	102894932	102895044	112	8	0	0								1													0	0	112		0	0	0	0	0	0	0	112	0	0	0	0	0	0	0	0	0
chr10	102894743	102895343	102894932	102895051	119	7	4	0.363636		1																			0	0	119		0	119	0	0	0	0	0	0	0	0	0	0	0	0	0	0	0
chr10	102894743	102895343	102894932	102895056	124	12	0	0	1																				0	0	124		124	0	0	0	0	0	0	0	0	0	0	0	0	0	0	0	0
chr10	102894743	102895343	102894932	102895058	126	9	3	0.25		1																			0	0	126		0	126	0	0	0	0	0	0	0	0	0	0	0	0	0	0	0
chr10	102894743	102895343	102894932	102895146	214	9	8	0.470588		1																			0	0	214		0	214	0	0	0	0	0	0	0	0	0	0	0	0	0	0	0
chr10	102894743	102895343	102894932	102895168	236	17	0	0		1																			0	0	236		0	236	0	0	0	0	0	0	0	0	0	0	0	0	0	0	0
chr10	102894743	102895343	102894933	102895101	168	13	0	0						1															0	0	168		0	0	0	0	0	168	0	0	0	0	0	0	0	0	0	0	0
chr10	102894743	102895343	102894933	102895126	193	9	6	0.4		1																			0	0	193		0	193	0	0	0	0	0	0	0	0	0	0	0	0	0	0	0
chr10	102894743	102895343	102894934	102895099	165	12	1	0.0769231														1							0	0	165		0	0	0	0	0	0	0	0	0	0	0	0	0	165	0	0	0
chr10	102894743	102895343	102894941	102895002	61	4	0	0		1																			0	0	61		0	61	0	0	0	0	0	0	0	0	0	0	0	0	0	0	0
chr10	102894743	102895343	102894941	102895058	117	7	5	0.416667		1																			0	0	117		0	117	0	0	0	0	0	0	0	0	0	0	0	0	0	0	0
chr10	102894743	102895343	102894941	102895203	241	17	2	0.105263							1														0	0	241		0	0	0	0	0	0	241	0	0	0	0	0	0	0	0	0	0
chr10	102894743	102895343	102894942	102895086	144	13	0	0													1								0	0	144		0	0	0	0	0	0	0	0	0	0	0	0	144	0	0	0	0
chr10	102894743	102895343	102894943	102895096	153	13	0	0															1						0	0	153		0	0	0	0	0	0	0	0	0	0	0	0	0	0	153	0	0
chr10	102894743	102895343	102894947	102895071	124	13	0	0																1					0	0	124		0	0	0	0	0	0	0	0	0	0	0	0	0	0	0	124	0
chr10	102894743	102895343	102894947	102895089	142	10	3	0.230769												1									0	0	142		0	0	0	0	0	0	0	0	0	0	0	142	0	0	0	0	0
chr10	102894743	102895343	102894948	102895113	165	14	0	0															1						0	0	165		0	0	0	0	0	0	0	0	0	0	0	0	0	0	165	0	0
chr10	102894743	102895343	102894948	102895117	169	13	1	0.0714286														1							0	0	169		0	0	0	0	0	0	0	0	0	0	0	0	0	169	0	0	0
chr10	102894743	102895343	102894949	102894997	48	3	0	0	1																				0	0	48		48	0	0	0	0	0	0	0	0	0	0	0	0	0	0	0	0
chr10	102894743	102895343	102894949	102895036	87	4	2	0.333333	1																				0	0	87		87	0	0	0	0	0	0	0	0	0	0	0	0	0	0	0	0
chr10	102894743	102895343	102894949	102895037	88	3	3	0.5	1																				0	0	88		88	0	0	0	0	0	0	0	0	0	0	0	0	0	0	0	0
chr10	102894743	102895343	102894949	102895087	138	12	0	0						1															0	0	138		0	0	0	0	0	138	0	0	0	0	0	0	0	0	0	0	0
chr10	102894743	102895343	102894949	102895123	174	6	8	0.571429	1																				0	0	174		174	0	0	0	0	0	0	0	0	0	0	0	0	0	0	0	0
chr10	102894743	102895343	102894949	102895153	204	5	11	0.6875	1																				0	0	204		204	0	0	0	0	0	0	0	0	0	0	0	0	0	0	0	0
chr10	102894743	102895343	102894950	102894997	47	3	0	0		1																			0	0	47		0	47	0	0	0	0	0	0	0	0	0	0	0	0	0	0	0
chr10	102894743	102895343	102894950	102895126	176	5	9	0.642857	1																				0	0	176		176	0	0	0	0	0	0	0	0	0	0	0	0	0	0	0	0
chr10	102894743	102895343	102894951	102895113	162	13	0	0											1										0	0	162		0	0	0	0	0	0	0	0	0	0	162	0	0	0	0	0	0
chr10	102894743	102895343	102894951	102895134	183	13	3	0.1875	1																				0	0	183		183	0	0	0	0	0	0	0	0	0	0	0	0	0	0	0	0
chr10	102894743	102895343	102894952	102895099	147	12	0	0															1						0	0	147		0	0	0	0	0	0	0	0	0	0	0	0	0	0	147	0	0
chr10	102894743	102895343	102894956	102895112	156	13	0	0								1													0	0	156		0	0	0	0	0	0	0	156	0	0	0	0	0	0	0	0	0
chr10	102894743	102895343	102894957	102895056	99	6	5	0.454545	1																				0	0	99		99	0	0	0	0	0	0	0	0	0	0	0	0	0	0	0	0
chr10	102894743	102895343	102894957	102895094	137	12	0	0								1													0	0	137		0	0	0	0	0	0	0	137	0	0	0	0	0	0	0	0	0
chr10	102894743	102895343	102894957	102895131	174	12	2	0.142857	1																				0	0	174		174	0	0	0	0	0	0	0	0	0	0	0	0	0	0	0	0
chr10	102894743	102895343	102894958	102895036	78	5	1	0.166667		1																			0	0	78		0	78	0	0	0	0	0	0	0	0	0	0	0	0	0	0	0
chr10	102894743	102895343	102894959	102895109	150	13	0	0											1										0	0	150		0	0	0	0	0	0	0	0	0	0	150	0	0	0	0	0	0
chr10	102894743	102895343	102894964	102895110	146	11	1	0.0833333																			1		0	0	146		0	0	0	0	0	0	0	0	0	0	0	0	0	0	0	0	0
chr10	102894743	102895343	102894969	102895090	121	8	1	0.111111										1											0	0	121		0	0	0	0	0	0	0	0	0	121	0	0	0	0	0	0	0
chr10	102894743	102895343	102894970	102895111	141	12	0	0								1													0	0	141		0	0	0	0	0	0	0	141	0	0	0	0	0	0	0	0	0
chr10	102894743	102895343	102894971	102895030	59	4	0	0	1																				0	0	59		59	0	0	0	0	0	0	0	0	0	0	0	0	0	0	0	0
chr10	102894743	102895343	102894971	102895082	111	11	0	0																1					0	0	111		0	0	0	0	0	0	0	0	0	0	0	0	0	0	0	111	0
chr10	102894743	102895343	102894971	102895151	180	11	4	0.266667		1																			0	0	180		0	180	0	0	0	0	0	0	0	0	0	0	0	0	0	0	0
chr10	102894743	102895343	102894971	102895165	194	12	3	0.2		1																			0	0	194		0	194	0	0	0	0	0	0	0	0	0	0	0	0	0	0	0
chr10	102894743	102895343	102894973	102895124	151	13	0	0															1						0	0	151		0	0	0	0	0	0	0	0	0	0	0	0	0	0	151	0	0
chr10	102894743	102895343	102894978	102895135	157	14	0	0									1												0	0	157		0	0	0	0	0	0	0	0	157	0	0	0	0	0	0	0	0
chr10	102894743	102895343	102894978	102895176	198	16	0	0									1												0	0	198		0	0	0	0	0	0	0	0	198	0	0	0	0	0	0	0	0
chr10	102894743	102895343	102894982	102895036	54	4	0	0		1																			0	0	54		0	54	0	0	0	0	0	0	0	0	0	0	0	0	0	0	0
chr10	102894743	102895343	102894984	102895102	118	9	0	0								1													0	0	118		0	0	0	0	0	0	0	118	0	0	0	0	0	0	0	0	0
chr10	102894743	102895343	102894984	102895112	128	1	9	0.9	1																				0	0	128		128	0	0	0	0	0	0	0	0	0	0	0	0	0	0	0	0
chr10	102894743	102895343	102894984	102895121	137	11	0	0				1																	0	0	137		0	0	0	137	0	0	0	0	0	0	0	0	0	0	0	0	0
chr10	102894743	102895343	102894984	102895126	142	1	10	0.909091	1																				0	0	142		142	0	0	0	0	0	0	0	0	0	0	0	0	0	0	0	0
chr10	102894743	102895343	102894984	102895127	143	11	0	0																			1		0	0	143		0	0	0	0	0	0	0	0	0	0	0	0	0	0	0	0	0
chr10	102894743	102895343	102894984	102895131	147	9	2	0.181818	1																				0	0	147		147	0	0	0	0	0	0	0	0	0	0	0	0	0	0	0	0
chr10	102894743	102895343	102894984	102895159	175	13	0	0				1																	0	0	175		0	0	0	175	0	0	0	0	0	0	0	0	0	0	0	0	0
chr10	102894743	102895343	102894985	102895135	150	12	0	0				1																	0	0	150		0	0	0	150	0	0	0	0	0	0	0	0	0	0	0	0	0
chr10	102894743	102895343	102894985	102895159	174	13	0	0										1											0	0	174		0	0	0	0	0	0	0	0	0	174	0	0	0	0	0	0	0
chr10	102894743	102895343	102894985	102895201	216	11	4	0.266667		1																			0	0	216		0	216	0	0	0	0	0	0	0	0	0	0	0	0	0	0	0
chr10	102894743	102895343	102894987	102895168	181	2	12	0.857143															1						0	0	181		0	0	0	0	0	0	0	0	0	0	0	0	0	0	181	0	0
chr10	102894743	102895343	102894987	102895196	209	15	0	0											1										0	0	209		0	0	0	0	0	0	0	0	0	0	209	0	0	0	0	0	0
chr10	102894743	102895343	102894989	102895133	144	11	0	0				1																	0	0	144		0	0	0	144	0	0	0	0	0	0	0	0	0	0	0	0	0
chr10	102894743	102895343	102894990	102895022	32	0	2	1	1																				0	0	32		32	0	0	0	0	0	0	0	0	0	0	0	0	0	0	0	0
chr10	102894743	102895343	102894994	102895088	94	9	0	0								1													0	0	94		0	0	0	0	0	0	0	94	0	0	0	0	0	0	0	0	0
chr10	102894743	102895343	102894995	102895143	148	10	3	0.230769												1									0	0	148		0	0	0	0	0	0	0	0	0	0	0	148	0	0	0	0	0
chr10	102894743	102895343	102894998	102895110	112	10	0	0													1								0	0	112		0	0	0	0	0	0	0	0	0	0	0	0	112	0	0	0	0
chr10	102894743	102895343	102895004	102895163	159	13	0	0											1										0	0	159		0	0	0	0	0	0	0	0	0	0	159	0	0	0	0	0	0
chr10	102894743	102895343	102895009	102895080	71	9	0	0												1									0	0	71		0	0	0	0	0	0	0	0	0	0	0	71	0	0	0	0	0
chr10	102894743	102895343	102895010	102895144	134	12	1	0.0769231															1						0	0	134		0	0	0	0	0	0	0	0	0	0	0	0	0	0	134	0	0
chr10	102894743	102895343	102895012	102895147	135	13	0	0													1								0	0	135		0	0	0	0	0	0	0	0	0	0	0	0	135	0	0	0	0
chr10	102894743	102895343	102895013	102895256	240	16	0	0																1					0	0	240		0	0	0	0	0	0	0	0	0	0	0	0	0	0	0	240	0
chr10	102894743	102895343	102895015	102895271	240	17	0	0						1															0	0	240		0	0	0	0	0	240	0	0	0	0	0	0	0	0	0	0	0
chr10	102894743	102895343	102895016	102895055	39	8	0	0	1																				0	0	39		39	0	0	0	0	0	0	0	0	0	0	0	0	0	0	0	0
chr10	102894743	102895343	102895016	102895056	40	8	0	0	1																				0	0	40		40	0	0	0	0	0	0	0	0	0	0	0	0	0	0	0	0
chr10	102894743	102895343	102895016	102895131	115	10	0	0	1																				0	0	115		115	0	0	0	0	0	0	0	0	0	0	0	0	0	0	0	0
chr10	102894743	102895343	102895016	102895153	137	13	0	0																	1				0	0	137		0	0	0	0	0	0	0	0	0	0	0	0	0	0	0	0	137
chr10	102894743	102895343	102895017	102895088	71	8	1	0.111111	1																				0	0	71		71	0	0	0	0	0	0	0	0	0	0	0	0	0	0	0	0
chr10	102894743	102895343	102895017	102895096	79	8	1	0.111111		1																			0	0	79		0	79	0	0	0	0	0	0	0	0	0	0	0	0	0	0	0
chr10	102894743	102895343	102895017	102895127	110	4	7	0.636364		1																			0	0	110		0	110	0	0	0	0	0	0	0	0	0	0	0	0	0	0	0
chr10	102894743	102895343	102895017	102895153	136	13	0	0			1																		0	0	136		0	0	136	0	0	0	0	0	0	0	0	0	0	0	0	0	0
chr10	102894743	102895343	102895017	102895162	145	13	0	0			1																		0	0	145		0	0	145	0	0	0	0	0	0	0	0	0	0	0	0	0	0
chr10	102894743	102895343	102895018	102895126	108	5	6	0.545455		1																			0	0	108		0	108	0	0	0	0	0	0	0	0	0	0	0	0	0	0	0
chr10	102894743	102895343	102895018	102895126	108	9	2	0.181818	1																				0	0	108		108	0	0	0	0	0	0	0	0	0	0	0	0	0	0	0	0
chr10	102894743	102895343	102895018	102895127	109	4	7	0.636364	1																				0	0	109		109	0	0	0	0	0	0	0	0	0	0	0	0	0	0	0	0
chr10	102894743	102895343	102895018	102895127	109	5	6	0.545455		1																			0	0	109		0	109	0	0	0	0	0	0	0	0	0	0	0	0	0	0	0
chr10	102894743	102895343	102895018	102895134	116	7	4	0.363636		1																			0	0	116		0	116	0	0	0	0	0	0	0	0	0	0	0	0	0	0	0
chr10	102894743	102895343	102895018	102895146	128	9	4	0.307692	1																				0	0	128		128	0	0	0	0	0	0	0	0	0	0	0	0	0	0	0	0
chr10	102894743	102895343	102895018	102895153	135	5	8	0.615385	1																				0	0	135		135	0	0	0	0	0	0	0	0	0	0	0	0	0	0	0	0
chr10	102894743	102895343	102895019	102895126	107	8	3	0.272727	1																				0	0	107		107	0	0	0	0	0	0	0	0	0	0	0	0	0	0	0	0
chr10	102894743	102895343	102895022	102895131	109	9	0	0	1																				0	0	109		109	0	0	0	0	0	0	0	0	0	0	0	0	0	0	0	0
chr10	102894743	102895343	102895023	102895056	33	5	1	0.166667		1																			0	0	33		0	33	0	0	0	0	0	0	0	0	0	0	0	0	0	0	0
chr10	102894743	102895343	102895023	102895057	34	5	1	0.166667	1																				0	0	34		34	0	0	0	0	0	0	0	0	0	0	0	0	0	0	0	0
chr10	102894743	102895343	102895023	102895131	108	9	0	0	1	1																			0	0	108		108	108	0	0	0	0	0	0	0	0	0	0	0	0	0	0	0
chr10	102894743	102895343	102895023	102895168	145	12	0	0																		1			0	0	145		0	0	0	0	0	0	0	0	0	0	0	0	0	0	0	0	0
chr10	102894743	102895343	102895023	102895184	161	3	9	0.75	1																				0	0	161		161	0	0	0	0	0	0	0	0	0	0	0	0	0	0	0	0
chr10	102894743	102895343	102895023	102895190	167	12	0	0					1																0	0	167		0	0	0	0	167	0	0	0	0	0	0	0	0	0	0	0	0
chr10	102894743	102895343	102895024	102895056	32	3	3	0.5		1																			0	0	32		0	32	0	0	0	0	0	0	0	0	0	0	0	0	0	0	0
chr10	102894743	102895343	102895024	102895056	32	6	0	0	1																				0	0	32		32	0	0	0	0	0	0	0	0	0	0	0	0	0	0	0	0
chr10	102894743	102895343	102895025	102895131	106	6	3	0.333333		1																			0	0	106		0	106	0	0	0	0	0	0	0	0	0	0	0	0	0	0	0
chr10	102894743	102895343	102895025	102895193	168	10	3	0.230769	1																				0	0	168		168	0	0	0	0	0	0	0	0	0	0	0	0	0	0	0	0
chr10	102894743	102895343	102895025	102895193	168	13	0	0																1					0	0	168		0	0	0	0	0	0	0	0	0	0	0	0	0	0	0	168	0
chr10	102894743	102895343	102895026	102895056	30	1	5	0.833333		1																			0	0	30		0	30	0	0	0	0	0	0	0	0	0	0	0	0	0	0	0
chr10	102894743	102895343	102895026	102895129	103	8	1	0.111111	1																				0	0	103		103	0	0	0	0	0	0	0	0	0	0	0	0	0	0	0	0
chr10	102894743	102895343	102895026	102895134	108	7	2	0.222222	1																				0	0	108		108	0	0	0	0	0	0	0	0	0	0	0	0	0	0	0	0
chr10	102894743	102895343	102895032	102895131	99	0	9	1	1																				0	0	99		99	0	0	0	0	0	0	0	0	0	0	0	0	0	0	0	0
chr10	102894743	102895343	102895035	102895180	145	12	0	0															1	1					0	0	145		0	0	0	0	0	0	0	0	0	0	0	0	0	0	145	145	0
chr10	102894743	102895343	102895036	102895192	156	12	0	0																			1		0	0	156		0	0	0	0	0	0	0	0	0	0	0	0	0	0	0	0	0
chr10	102894743	102895343	102895037	102895176	139	11	0	0										1											0	0	139		0	0	0	0	0	0	0	0	0	139	0	0	0	0	0	0	0
chr10	102894743	102895343	102895041	102895167	126	9	0	0									1												0	0	126		0	0	0	0	0	0	0	0	126	0	0	0	0	0	0	0	0
chr10	102894743	102895343	102895042	102895233	191	13	0	0			1																		0	0	191		0	0	191	0	0	0	0	0	0	0	0	0	0	0	0	0	0
chr10	102894743	102895343	102895043	102895227	184	12	0	0																			1		0	0	184		0	0	0	0	0	0	0	0	0	0	0	0	0	0	0	0	0
chr10	102894743	102895343	102895046	102895193	147	9	1	0.1		1																			0	0	147		0	147	0	0	0	0	0	0	0	0	0	0	0	0	0	0	0
chr10	102894743	102895343	102895046	102895197	151	8	2	0.2												1									0	0	151		0	0	0	0	0	0	0	0	0	0	0	151	0	0	0	0	0
chr10	102894743	102895343	102895046	102895294	240	12	1	0.0769231									1												0	0	240		0	0	0	0	0	0	0	0	240	0	0	0	0	0	0	0	0
chr10	102894743	102895343	102895047	102895128	81	5	0	0																	1				0	0	81		0	0	0	0	0	0	0	0	0	0	0	0	0	0	0	0	81
chr10	102894743	102895343	102895047	102895214	167	10	0	0										1											0	0	167		0	0	0	0	0	0	0	0	0	167	0	0	0	0	0	0	0
chr10	102894743	102895343	102895047	102895217	170	9	0	0									1												0	0	170		0	0	0	0	0	0	0	0	170	0	0	0	0	0	0	0	0
chr10	102894743	102895343	102895047	102895224	177	10	0	0														1							0	0	177		0	0	0	0	0	0	0	0	0	0	0	0	0	177	0	0	0
chr10	102894743	102895343	102895049	102895180	131	8	0	0																			1		0	0	131		0	0	0	0	0	0	0	0	0	0	0	0	0	0	0	0	0
chr10	102894743	102895343	102895050	102895200	150	8	0	0							1														0	0	150		0	0	0	0	0	0	150	0	0	0	0	0	0	0	0	0	0
chr10	102894743	102895343	102895051	102895157	106	0	6	1													1								0	0	106		0	0	0	0	0	0	0	0	0	0	0	0	106	0	0	0	0
chr10	102894743	102895343	102895051	102895256	205	8	2	0.2														1							0	0	205		0	0	0	0	0	0	0	0	0	0	0	0	0	205	0	0	0
chr10	102894743	102895343	102895052	102895130	78	1	3	0.75		1																			0	0	78		0	78	0	0	0	0	0	0	0	0	0	0	0	0	0	0	0
chr10	102894743	102895343	102895053	102895295	241	12	0	0				1																	0	0	241		0	0	0	241	0	0	0	0	0	0	0	0	0	0	0	0	0
chr10	102894743	102895343	102895054	102895130	76	2	2	0.5	1																				0	0	76		76	0	0	0	0	0	0	0	0	0	0	0	0	0	0	0	0
chr10	102894743	102895343	102895054	102895256	202	10	0	0		1																			0	0	202		0	202	0	0	0	0	0	0	0	0	0	0	0	0	0	0	0
chr10	102894743	102895343	102895055	102895129	74	3	0	0	1																				0	0	74		74	0	0	0	0	0	0	0	0	0	0	0	0	0	0	0	0
chr10	102894743	102895343	102895055	102895130	75	0	2	1		1																			0	0	75		0	75	0	0	0	0	0	0	0	0	0	0	0	0	0	0	0
chr10	102894743	102895343	102895056	102895130	74	3	0	0	1																				0	0	74		74	0	0	0	0	0	0	0	0	0	0	0	0	0	0	0	0
chr10	102894743	102895343	102895056	102895132	76	2	1	0.333333		1																			0	0	76		0	76	0	0	0	0	0	0	0	0	0	0	0	0	0	0	0
chr10	102894743	102895343	102895056	102895184	128	2	4	0.666667	1																				0	0	128		128	0	0	0	0	0	0	0	0	0	0	0	0	0	0	0	0
chr10	102894743	102895343	102895056	102895190	134	6	0	0									1												0	0	134		0	0	0	0	0	0	0	0	134	0	0	0	0	0	0	0	0
chr10	102894743	102895343	102895056	102895221	165	8	0	0											1										0	0	165		0	0	0	0	0	0	0	0	0	0	165	0	0	0	0	0	0
chr10	102894743	102895343	102895056	102895226	170	8	0	0					1																0	0	170		0	0	0	0	170	0	0	0	0	0	0	0	0	0	0	0	0
chr10	102894743	102895343	102895056	102895289	233	10	1	0.0909091						1															0	0	233		0	0	0	0	0	233	0	0	0	0	0	0	0	0	0	0	0
chr10	102894743	102895343	102895057	102895228	171	4	4	0.5	1																				0	0	171		171	0	0	0	0	0	0	0	0	0	0	0	0	0	0	0	0
chr10	102894743	102895343	102895059	102895325	224	9	0	0													1								0	0	224		0	0	0	0	0	0	0	0	0	0	0	0	224	0	0	0	0
chr10	102894743	102895343	102895060	102895208	148	5	1	0.166667												1									0	0	148		0	0	0	0	0	0	0	0	0	0	0	148	0	0	0	0	0
chr10	102894743	102895343	102895060	102895245	185	8	0	0																1					0	0	185		0	0	0	0	0	0	0	0	0	0	0	0	0	0	0	185	0
chr10	102894743	102895343	102895061	102895179	118	1	4	0.8	1																				0	0	118		118	0	0	0	0	0	0	0	0	0	0	0	0	0	0	0	0
chr10	102894743	102895343	102895061	102895191	130	3	2	0.4												1									0	0	130		0	0	0	0	0	0	0	0	0	0	0	130	0	0	0	0	0
chr10	102894743	102895343	102895061	102895192	131	6	0	0																			1		0	0	131		0	0	0	0	0	0	0	0	0	0	0	0	0	0	0	0	0
chr10	102894743	102895343	102895064	102895183	119	5	0	0									1												0	0	119		0	0	0	0	0	0	0	0	119	0	0	0	0	0	0	0	0
chr10	102894743	102895343	102895064	102895184	120	1	4	0.8	1																				0	0	120		120	0	0	0	0	0	0	0	0	0	0	0	0	0	0	0	0
chr10	102894743	102895343	102895064	102895205	141	4	2	0.333333	1																				0	0	141		141	0	0	0	0	0	0	0	0	0	0	0	0	0	0	0	0
chr10	102894743	102895343	102895065	102895221	156	8	0	0			1																		0	0	156		0	0	156	0	0	0	0	0	0	0	0	0	0	0	0	0	0
chr10	102894743	102895343	102895067	102895130	63	2	0	0		1																			0	0	63		0	63	0	0	0	0	0	0	0	0	0	0	0	0	0	0	0
chr10	102894743	102895343	102895067	102895185	118	3	2	0.4	1																				0	0	118		118	0	0	0	0	0	0	0	0	0	0	0	0	0	0	0	0
chr10	102894743	102895343	102895068	102895212	144	6	0	0										1											0	0	144		0	0	0	0	0	0	0	0	0	144	0	0	0	0	0	0	0
chr10	102894743	102895343	102895069	102895195	126	5	0	0																	1				0	0	126		0	0	0	0	0	0	0	0	0	0	0	0	0	0	0	0	126
chr10	102894743	102895343	102895070	102895130	60	1	1	0.5		1																			0	0	60		0	60	0	0	0	0	0	0	0	0	0	0	0	0	0	0	0
chr10	102894743	102895343	102895071	102895186	115	2	3	0.6	1																				0	0	115		115	0	0	0	0	0	0	0	0	0	0	0	0	0	0	0	0
chr10	102894743	102895343	102895071	102895205	134	6	0	0		1																			0	0	134		0	134	0	0	0	0	0	0	0	0	0	0	0	0	0	0	0
chr10	102894743	102895343	102895071	102895214	143	6	0	0																	1				0	0	143		0	0	0	0	0	0	0	0	0	0	0	0	0	0	0	0	143
chr10	102894743	102895343	102895071	102895220	149	7	0	0									1												0	0	149		0	0	0	0	0	0	0	0	149	0	0	0	0	0	0	0	0
chr10	102894743	102895343	102895072	102895301	229	8	2	0.2		1																			0	0	229		0	229	0	0	0	0	0	0	0	0	0	0	0	0	0	0	0
chr10	102894743	102895343	102895073	102895132	59	2	0	0		1																			0	0	59		0	59	0	0	0	0	0	0	0	0	0	0	0	0	0	0	0
chr10	102894743	102895343	102895074	102895184	110	5	0	0		1																			0	0	110		0	110	0	0	0	0	0	0	0	0	0	0	0	0	0	0	0
chr10	102894743	102895343	102895074	102895247	173	8	0	0																1					0	0	173		0	0	0	0	0	0	0	0	0	0	0	0	0	0	0	173	0
chr10	102894743	102895343	102895075	102895225	150	6	0	0										1											0	0	150		0	0	0	0	0	0	0	0	0	150	0	0	0	0	0	0	0
chr10	102894743	102895343	102895078	102895131	53	0	2	1	1																				0	0	53		53	0	0	0	0	0	0	0	0	0	0	0	0	0	0	0	0
chr10	102894743	102895343	102895078	102895222	144	7	0	0																	1				0	0	144		0	0	0	0	0	0	0	0	0	0	0	0	0	0	0	0	144
chr10	102894743	102895343	102895078	102895248	170	6	2	0.25		1																			0	0	170		0	170	0	0	0	0	0	0	0	0	0	0	0	0	0	0	0
chr10	102894743	102895343	102895079	102895185	106	1	4	0.8	1																				0	0	106		106	0	0	0	0	0	0	0	0	0	0	0	0	0	0	0	0
chr10	102894743	102895343	102895079	102895185	106	3	2	0.4	1																				0	0	106		106	0	0	0	0	0	0	0	0	0	0	0	0	0	0	0	0
chr10	102894743	102895343	102895080	102895131	51	2	0	0	1																				0	0	51		51	0	0	0	0	0	0	0	0	0	0	0	0	0	0	0	0
chr10	102894743	102895343	102895080	102895187	107	1	4	0.8	1																				0	0	107		107	0	0	0	0	0	0	0	0	0	0	0	0	0	0	0	0
chr10	102894743	102895343	102895080	102895224	144	7	0	0																	1				0	0	144		0	0	0	0	0	0	0	0	0	0	0	0	0	0	0	0	144
chr10	102894743	102895343	102895080	102895254	174	4	4	0.5	1																				0	0	174		174	0	0	0	0	0	0	0	0	0	0	0	0	0	0	0	0
chr10	102894743	102895343	102895080	102895396	242	6	1	0.142857																1					0	53	189		0	0	0	0	0	0	0	0	0	0	0	0	0	0	0	189	0
chr10	102894743	102895343	102895081	102895205	124	5	1	0.166667		1																			0	0	124		0	124	0	0	0	0	0	0	0	0	0	0	0	0	0	0	0
chr10	102894743	102895343	102895081	102895223	142	7	0	0																			1		0	0	142		0	0	0	0	0	0	0	0	0	0	0	0	0	0	0	0	0
chr10	102894743	102895343	102895081	102895270	189	8	1	0.111111																			1		0	0	189		0	0	0	0	0	0	0	0	0	0	0	0	0	0	0	0	0
chr10	102894743	102895343	102895082	102895222	140	7	0	0											1										0	0	140		0	0	0	0	0	0	0	0	0	0	140	0	0	0	0	0	0
chr10	102894743	102895343	102895084	102895215	131	7	0	0																1					0	0	131		0	0	0	0	0	0	0	0	0	0	0	0	0	0	0	131	0
chr10	102894743	102895343	102895084	102895227	143	3	4	0.571429												1									0	0	143		0	0	0	0	0	0	0	0	0	0	0	143	0	0	0	0	0
chr10	102894743	102895343	102895085	102895232	147	8	0	0				1																	0	0	147		0	0	0	147	0	0	0	0	0	0	0	0	0	0	0	0	0
chr10	102894743	102895343	102895086	102895223	137	7	0	0						1															0	0	137		0	0	0	0	0	137	0	0	0	0	0	0	0	0	0	0	0
chr10	102894743	102895343	102895086	102895229	143	7	0	0										1											0	0	143		0	0	0	0	0	0	0	0	0	143	0	0	0	0	0	0	0
chr10	102894743	102895343	102895086	102895234	148	8	0	0							1														0	0	148		0	0	0	0	0	0	148	0	0	0	0	0	0	0	0	0	0
chr10	102894743	102895343	102895087	102895178	91	5	0	0				1																	0	0	91		0	0	0	91	0	0	0	0	0	0	0	0	0	0	0	0	0
chr10	102894743	102895343	102895087	102895205	118	6	0	0							1														0	0	118		0	0	0	0	0	0	118	0	0	0	0	0	0	0	0	0	0
chr10	102894743	102895343	102895087	102895231	144	7	0	0				1																	0	0	144		0	0	0	144	0	0	0	0	0	0	0	0	0	0	0	0	0
chr10	102894743	102895343	102895087	102895243	156	8	0	0														1			1				0	0	156		0	0	0	0	0	0	0	0	0	0	0	0	0	156	0	0	156
chr10	102894743	102895343	102895090	102895221	131	7	0	0							1														0	0	131		0	0	0	0	0	0	131	0	0	0	0	0	0	0	0	0	0
chr10	102894743	102895343	102895090	102895234	144	7	1	0.125											1										0	0	144		0	0	0	0	0	0	0	0	0	0	144	0	0	0	0	0	0
chr10	102894743	102895343	102895090	102895234	144	8	0	0															1						0	0	144		0	0	0	0	0	0	0	0	0	0	0	0	0	0	144	0	0
chr10	102894743	102895343	102895090	102895248	158	8	0	0																	1				0	0	158		0	0	0	0	0	0	0	0	0	0	0	0	0	0	0	0	158
chr10	102894743	102895343	102895090	102895249	159	8	0	0														1							0	0	159		0	0	0	0	0	0	0	0	0	0	0	0	0	159	0	0	0
chr10	102894743	102895343	102895090	102895274	184	7	1	0.125													1								0	0	184		0	0	0	0	0	0	0	0	0	0	0	0	184	0	0	0	0
chr10	102894743	102895343	102895091	102895221	130	7	0	0					1																0	0	130		0	0	0	0	130	0	0	0	0	0	0	0	0	0	0	0	0
chr10	102894743	102895343	102895092	102895245	153	8	0	0								1													0	0	153		0	0	0	0	0	0	0	153	0	0	0	0	0	0	0	0	0
chr10	102894743	102895343	102895092	102895270	178	9	0	0											1										0	0	178		0	0	0	0	0	0	0	0	0	0	178	0	0	0	0	0	0
chr10	102894743	102895343	102895093	102895220	127	6	0	0										1											0	0	127		0	0	0	0	0	0	0	0	0	127	0	0	0	0	0	0	0
chr10	102894743	102895343	102895093	102895225	132	7	0	0						1															0	0	132		0	0	0	0	0	132	0	0	0	0	0	0	0	0	0	0	0
chr10	102894743	102895343	102895094	102895227	133	7	0	0			1																		0	0	133		0	0	133	0	0	0	0	0	0	0	0	0	0	0	0	0	0
chr10	102894743	102895343	102895095	102895237	142	5	0	0																1					0	0	142		0	0	0	0	0	0	0	0	0	0	0	0	0	0	0	142	0
chr10	102894743	102895343	102895096	102895222	126	7	0	0			1																		0	0	126		0	0	126	0	0	0	0	0	0	0	0	0	0	0	0	0	0
chr10	102894743	102895343	102895096	102895230	134	7	0	0							1														0	0	134		0	0	0	0	0	0	134	0	0	0	0	0	0	0	0	0	0
chr10	102894743	102895343	102895096	102895240	144	8	0	0									1												0	0	144		0	0	0	0	0	0	0	0	144	0	0	0	0	0	0	0	0
chr10	102894743	102895343	102895096	102895366	238	9	0	0																			1		0	23	215		0	0	0	0	0	0	0	0	0	0	0	0	0	0	0	0	0
chr10	102894743	102895343	102895097	102895232	135	8	0	0			1																		0	0	135		0	0	135	0	0	0	0	0	0	0	0	0	0	0	0	0	0
chr10	102894743	102895343	102895097	102895239	142	8	0	0															1						0	0	142		0	0	0	0	0	0	0	0	0	0	0	0	0	0	142	0	0
chr10	102894743	102895343	102895099	102895212	113	6	0	0										1											0	0	113		0	0	0	0	0	0	0	0	0	113	0	0	0	0	0	0	0
chr10	102894743	102895343	102895102	102895240	138	8	0	0											1										0	0	138		0	0	0	0	0	0	0	0	0	0	138	0	0	0	0	0	0
chr10	102894743	102895343	102895102	102895249	147	8	0	0													1								0	0	147		0	0	0	0	0	0	0	0	0	0	0	0	147	0	0	0	0
chr10	102894743	102895343	102895103	102895192	89	6	0	0										1											0	0	89		0	0	0	0	0	0	0	0	0	89	0	0	0	0	0	0	0
chr10	102894743	102895343	102895104	102895234	130	8	0	0																1					0	0	130		0	0	0	0	0	0	0	0	0	0	0	0	0	0	0	130	0
chr10	102894743	102895343	102895107	102895234	127	7	0	0																	1				0	0	127		0	0	0	0	0	0	0	0	0	0	0	0	0	0	0	0	127
chr10	102894743	102895343	102895107	102895235	128	8	0	0				1																	0	0	128		0	0	0	128	0	0	0	0	0	0	0	0	0	0	0	0	0
chr10	102894743	102895343	102895108	102895246	138	7	0	0																	1				0	0	138		0	0	0	0	0	0	0	0	0	0	0	0	0	0	0	0	138
chr10	102894743	102895343	102895109	102895256	147	7	0	0				1																	0	0	147		0	0	0	147	0	0	0	0	0	0	0	0	0	0	0	0	0
chr10	102894743	102895343	102895111	102895210	99	5	0	0																	1				0	0	99		0	0	0	0	0	0	0	0	0	0	0	0	0	0	0	0	99
chr10	102894743	102895343	102895112	102895244	132	7	0	0				1																	0	0	132		0	0	0	132	0	0	0	0	0	0	0	0	0	0	0	0	0
chr10	102894743	102895343	102895112	102895248	136	7	0	0															1						0	0	136		0	0	0	0	0	0	0	0	0	0	0	0	0	0	136	0	0
chr10	102894743	102895343	102895112	102895255	143	7	0	0														1							0	0	143		0	0	0	0	0	0	0	0	0	0	0	0	0	143	0	0	0
chr10	102894743	102895343	102895113	102895226	113	5	1	0.166667			1																		0	0	113		0	0	113	0	0	0	0	0	0	0	0	0	0	0	0	0	0
chr10	102894743	102895343	102895113	102895269	156	7	0	0								1													0	0	156		0	0	0	0	0	0	0	156	0	0	0	0	0	0	0	0	0
chr10	102894743	102895343	102895115	102895193	78	2	2	0.5	1																				0	0	78		78	0	0	0	0	0	0	0	0	0	0	0	0	0	0	0	0
chr10	102894743	102895343	102895115	102895225	110	3	2	0.4												1									0	0	110		0	0	0	0	0	0	0	0	0	0	0	110	0	0	0	0	0
chr10	102894743	102895343	102895115	102895234	119	6	0	0														1							0	0	119		0	0	0	0	0	0	0	0	0	0	0	0	0	119	0	0	0
chr10	102894743	102895343	102895115	102895267	152	6	1	0.142857												1									0	0	152		0	0	0	0	0	0	0	0	0	0	0	152	0	0	0	0	0
chr10	102894743	102895343	102895116	102895234	118	6	0	0									1												0	0	118		0	0	0	0	0	0	0	0	118	0	0	0	0	0	0	0	0
chr10	102894743	102895343	102895116	102895283	167	8	0	0					1																0	0	167		0	0	0	0	167	0	0	0	0	0	0	0	0	0	0	0	0
chr10	102894743	102895343	102895118	102895184	66	3	0	0	1																				0	0	66		66	0	0	0	0	0	0	0	0	0	0	0	0	0	0	0	0
chr10	102894743	102895343	102895118	102895247	129	6	0	0																	1				0	0	129		0	0	0	0	0	0	0	0	0	0	0	0	0	0	0	0	129
chr10	102894743	102895343	102895118	102895278	160	8	0	0									1												0	0	160		0	0	0	0	0	0	0	0	160	0	0	0	0	0	0	0	0
chr10	102894743	102895343	102895118	102895289	171	8	0	0																1					0	0	171		0	0	0	0	0	0	0	0	0	0	0	0	0	0	0	171	0
chr10	102894743	102895343	102895119	102895245	126	4	2	0.333333					1																0	0	126		0	0	0	0	126	0	0	0	0	0	0	0	0	0	0	0	0
chr10	102894743	102895343	102895119	102895248	129	6	0	0																			1		0	0	129		0	0	0	0	0	0	0	0	0	0	0	0	0	0	0	0	0
chr10	102894743	102895343	102895120	102895265	145	7	0	0														1							0	0	145		0	0	0	0	0	0	0	0	0	0	0	0	0	145	0	0	0
chr10	102894743	102895343	102895121	102895244	123	5	1	0.166667				1																	0	0	123		0	0	0	123	0	0	0	0	0	0	0	0	0	0	0	0	0
chr10	102894743	102895343	102895122	102895250	128	0	6	1															1						0	0	128		0	0	0	0	0	0	0	0	0	0	0	0	0	0	128	0	0
chr10	102894743	102895343	102895122	102895250	128	6	0	0								1													0	0	128		0	0	0	0	0	0	0	128	0	0	0	0	0	0	0	0	0
chr10	102894743	102895343	102895123	102895234	111	0	6	1															1						0	0	111		0	0	0	0	0	0	0	0	0	0	0	0	0	0	111	0	0
chr10	102894743	102895343	102895124	102895262	138	7	0	0															1						0	0	138		0	0	0	0	0	0	0	0	0	0	0	0	0	0	138	0	0
chr10	102894743	102895343	102895124	102895286	162	8	0	0													1								0	0	162		0	0	0	0	0	0	0	0	0	0	0	0	162	0	0	0	0
chr10	102894743	102895343	102895126	102895280	154	8	0	0									1												0	0	154		0	0	0	0	0	0	0	0	154	0	0	0	0	0	0	0	0
chr10	102894743	102895343	102895129	102895280	151	8	0	0																	1				0	0	151		0	0	0	0	0	0	0	0	0	0	0	0	0	0	0	0	151
chr10	102894743	102895343	102895130	102895220	90	5	0	0													1								0	0	90		0	0	0	0	0	0	0	0	0	0	0	0	90	0	0	0	0
chr10	102894743	102895343	102895132	102895267	135	7	0	0																			1		0	0	135		0	0	0	0	0	0	0	0	0	0	0	0	0	0	0	0	0
chr10	102894743	102895343	102895133	102895312	179	7	1	0.125								1													0	0	179		0	0	0	0	0	0	0	179	0	0	0	0	0	0	0	0	0
chr10	102894743	102895343	102895135	102895292	157	7	0	0															1						0	0	157		0	0	0	0	0	0	0	0	0	0	0	0	0	0	157	0	0
chr10	102894743	102895343	102895136	102895256	120	8	0	0														1							0	0	120		0	0	0	0	0	0	0	0	0	0	0	0	0	120	0	0	0
chr10	102894743	102895343	102895137	102895268	131	6	0	0													1								0	0	131		0	0	0	0	0	0	0	0	0	0	0	0	131	0	0	0	0
chr10	102894743	102895343	102895138	102895250	112	4	1	0.2	1																				0	0	112		112	0	0	0	0	0	0	0	0	0	0	0	0	0	0	0	0
chr10	102894743	102895343	102895138	102895278	140	7	0	0				1																	0	0	140		0	0	0	140	0	0	0	0	0	0	0	0	0	0	0	0	0
chr10	102894743	102895343	102895138	102895285	147	6	1	0.142857																		1			0	0	147		0	0	0	0	0	0	0	0	0	0	0	0	0	0	0	0	0
chr10	102894743	102895343	102895138	102895290	152	7	0	0															1		1				0	0	152		0	0	0	0	0	0	0	0	0	0	0	0	0	0	152	0	152
chr10	102894743	102895343	102895138	102895323	185	7	0	0																1					0	0	185		0	0	0	0	0	0	0	0	0	0	0	0	0	0	0	185	0
chr10	102894743	102895343	102895138	102895401	241	6	0	0																	1				0	58	183		0	0	0	0	0	0	0	0	0	0	0	0	0	0	0	0	183
chr10	102894743	102895343	102895139	102895222	83	4	0	0			1																		0	0	83		0	0	83	0	0	0	0	0	0	0	0	0	0	0	0	0	0
chr10	102894743	102895343	102895139	102895237	98	0	5	1															1						0	0	98		0	0	0	0	0	0	0	0	0	0	0	0	0	0	98	0	0
chr10	102894743	102895343	102895139	102895279	140	7	0	0								1													0	0	140		0	0	0	0	0	0	0	140	0	0	0	0	0	0	0	0	0
chr10	102894743	102895343	102895139	102895294	155	7	0	0						1															0	0	155		0	0	0	0	0	155	0	0	0	0	0	0	0	0	0	0	0
chr10	102894743	102895343	102895140	102895280	140	6	0	0																		1			0	0	140		0	0	0	0	0	0	0	0	0	0	0	0	0	0	0	0	0
chr10	102894743	102895343	102895141	102895255	114	4	0	0		1																			0	0	114		0	114	0	0	0	0	0	0	0	0	0	0	0	0	0	0	0
chr10	102894743	102895343	102895141	102895275	134	5	0	0													1								0	0	134		0	0	0	0	0	0	0	0	0	0	0	0	134	0	0	0	0
chr10	102894743	102895343	102895141	102895283	142	6	0	0												1									0	0	142		0	0	0	0	0	0	0	0	0	0	0	142	0	0	0	0	0
chr10	102894743	102895343	102895142	102895278	136	6	0	0									1												0	0	136		0	0	0	0	0	0	0	0	136	0	0	0	0	0	0	0	0
chr10	102894743	102895343	102895147	102895254	107	4	0	0																1					0	0	107		0	0	0	0	0	0	0	0	0	0	0	0	0	0	0	107	0
chr10	102894743	102895343	102895147	102895301	154	4	2	0.333333												1									0	0	154		0	0	0	0	0	0	0	0	0	0	0	154	0	0	0	0	0
chr10	102894743	102895343	102895148	102895255	107	4	0	0																	1				0	0	107		0	0	0	0	0	0	0	0	0	0	0	0	0	0	0	0	107
chr10	102894743	102895343	102895148	102895326	178	6	0	0									1												0	0	178		0	0	0	0	0	0	0	0	178	0	0	0	0	0	0	0	0
chr10	102894743	102895343	102895149	102895284	135	5	1	0.166667																		1			0	0	135		0	0	0	0	0	0	0	0	0	0	0	0	0	0	0	0	0
chr10	102894743	102895343	102895149	102895285	136	6	0	0											1										0	0	136		0	0	0	0	0	0	0	0	0	0	136	0	0	0	0	0	0
chr10	102894743	102895343	102895149	102895299	150	5	1	0.166667																	1				0	0	150		0	0	0	0	0	0	0	0	0	0	0	0	0	0	0	0	150
chr10	102894743	102895343	102895149	102895460	238	6	0	0																			1		0	117	121		0	0	0	0	0	0	0	0	0	0	0	0	0	0	0	0	0
chr10	102894743	102895343	102895150	102895271	121	4	1	0.2																1					0	0	121		0	0	0	0	0	0	0	0	0	0	0	0	0	0	0	121	0
chr10	102894743	102895343	102895150	102895276	126	5	1	0.166667														1							0	0	126		0	0	0	0	0	0	0	0	0	0	0	0	0	126	0	0	0
chr10	102894743	102895343	102895150	102895290	140	5	1	0.166667								1													0	0	140		0	0	0	0	0	0	0	140	0	0	0	0	0	0	0	0	0
chr10	102894743	102895343	102895150	102895294	144	6	0	0				1																	0	0	144		0	0	0	144	0	0	0	0	0	0	0	0	0	0	0	0	0
chr10	102894743	102895343	102895150	102895304	154	6	0	0																1					0	0	154		0	0	0	0	0	0	0	0	0	0	0	0	0	0	0	154	0
chr10	102894743	102895343	102895151	102895249	98	1	3	0.75	1																				0	0	98		98	0	0	0	0	0	0	0	0	0	0	0	0	0	0	0	0
chr10	102894743	102895343	102895151	102895272	121	4	1	0.2						1															0	0	121		0	0	0	0	0	121	0	0	0	0	0	0	0	0	0	0	0
chr10	102894743	102895343	102895152	102895205	53	2	0	0	1																				0	0	53		53	0	0	0	0	0	0	0	0	0	0	0	0	0	0	0	0
chr10	102894743	102895343	102895152	102895228	76	3	0	0		1																			0	0	76		0	76	0	0	0	0	0	0	0	0	0	0	0	0	0	0	0
chr10	102894743	102895343	102895152	102895238	86	4	0	0		1																			0	0	86		0	86	0	0	0	0	0	0	0	0	0	0	0	0	0	0	0
chr10	102894743	102895343	102895152	102895249	97	4	0	0	1	1																			0	0	97		97	97	0	0	0	0	0	0	0	0	0	0	0	0	0	0	0
chr10	102894743	102895343	102895152	102895293	141	5	1	0.166667										1											0	0	141		0	0	0	0	0	0	0	0	0	141	0	0	0	0	0	0	0
chr10	102894743	102895343	102895152	102895301	149	6	0	0	1	1																			0	0	149		149	149	0	0	0	0	0	0	0	0	0	0	0	0	0	0	0
chr10	102894743	102895343	102895153	102895212	59	2	0	0	1																				0	0	59		59	0	0	0	0	0	0	0	0	0	0	0	0	0	0	0	0
chr10	102894743	102895343	102895153	102895222	69	3	0	0		1																			0	0	69		0	69	0	0	0	0	0	0	0	0	0	0	0	0	0	0	0
chr10	102894743	102895343	102895153	102895278	125	5	0	0	1																				0	0	125		125	0	0	0	0	0	0	0	0	0	0	0	0	0	0	0	0
chr10	102894743	102895343	102895153	102895279	126	5	1	0.166667	1																				0	0	126		126	0	0	0	0	0	0	0	0	0	0	0	0	0	0	0	0
chr10	102894743	102895343	102895153	102895294	141	6	0	0		1																			0	0	141		0	141	0	0	0	0	0	0	0	0	0	0	0	0	0	0	0
chr10	102894743	102895343	102895153	102895396	242	6	0	0	1																				0	53	189		189	0	0	0	0	0	0	0	0	0	0	0	0	0	0	0	0
chr10	102894743	102895343	102895154	102895232	78	3	0	0	1																				0	0	78		78	0	0	0	0	0	0	0	0	0	0	0	0	0	0	0	0
chr10	102894743	102895343	102895154	102895280	126	5	1	0.166667	1																				0	0	126		126	0	0	0	0	0	0	0	0	0	0	0	0	0	0	0	0
chr10	102894743	102895343	102895154	102895283	129	5	1	0.166667			1																		0	0	129		0	0	129	0	0	0	0	0	0	0	0	0	0	0	0	0	0
chr10	102894743	102895343	102895154	102895288	134	5	1	0.166667	1																				0	0	134		134	0	0	0	0	0	0	0	0	0	0	0	0	0	0	0	0
chr10	102894743	102895343	102895155	102895184	29	1	0	0		1																			0	0	29		0	29	0	0	0	0	0	0	0	0	0	0	0	0	0	0	0
chr10	102894743	102895343	102895155	102895231	76	3	0	0										1											0	0	76		0	0	0	0	0	0	0	0	0	76	0	0	0	0	0	0	0
chr10	102894743	102895343	102895155	102895245	90	4	0	0	1																				0	0	90		90	0	0	0	0	0	0	0	0	0	0	0	0	0	0	0	0
chr10	102894743	102895343	102895155	102895256	101	4	0	0		1																			0	0	101		0	101	0	0	0	0	0	0	0	0	0	0	0	0	0	0	0
chr10	102894743	102895343	102895156	102895299	143	6	0	0															1						0	0	143		0	0	0	0	0	0	0	0	0	0	0	0	0	0	143	0	0
chr10	102894743	102895343	102895157	102895338	181	6	0	0	1																				0	0	181		181	0	0	0	0	0	0	0	0	0	0	0	0	0	0	0	0
chr10	102894743	102895343	102895160	102895283	123	6	0	0																	1				0	0	123		0	0	0	0	0	0	0	0	0	0	0	0	0	0	0	0	123
chr10	102894743	102895343	102895160	102895294	134	6	0	0															1						0	0	134		0	0	0	0	0	0	0	0	0	0	0	0	0	0	134	0	0
chr10	102894743	102895343	102895161	102895314	153	5	1	0.166667												1									0	0	153		0	0	0	0	0	0	0	0	0	0	0	153	0	0	0	0	0
chr10	102894743	102895343	102895162	102895335	173	6	0	0																1					0	0	173		0	0	0	0	0	0	0	0	0	0	0	0	0	0	0	173	0
chr10	102894743	102895343	102895163	102895250	87	4	0	0	1																				0	0	87		87	0	0	0	0	0	0	0	0	0	0	0	0	0	0	0	0
chr10	102894743	102895343	102895163	102895364	201	6	0	0											1										0	21	180		0	0	0	0	0	0	0	0	0	0	180	0	0	0	0	0	0
chr10	102894743	102895343	102895166	102895289	123	6	0	0					1																0	0	123		0	0	0	0	123	0	0	0	0	0	0	0	0	0	0	0	0
chr10	102894743	102895343	102895172	102895250	78	3	0	0																	1				0	0	78		0	0	0	0	0	0	0	0	0	0	0	0	0	0	0	0	78
chr10	102894743	102895343	102895173	102895306	133	5	0	0														1							0	0	133		0	0	0	0	0	0	0	0	0	0	0	0	0	133	0	0	0
chr10	102894743	102895343	102895174	102895314	140	5	0	0							1														0	0	140		0	0	0	0	0	0	140	0	0	0	0	0	0	0	0	0	0
chr10	102894743	102895343	102895177	102895212	35	1	0	0	1																				0	0	35		35	0	0	0	0	0	0	0	0	0	0	0	0	0	0	0	0
chr10	102894743	102895343	102895177	102895314	137	4	1	0.2	1																				0	0	137		137	0	0	0	0	0	0	0	0	0	0	0	0	0	0	0	0
chr10	102894743	102895343	102895179	102895299	120	5	0	0	1																				0	0	120		120	0	0	0	0	0	0	0	0	0	0	0	0	0	0	0	0
chr10	102894743	102895343	102895179	102895324	145	5	0	0										1											0	0	145		0	0	0	0	0	0	0	0	0	145	0	0	0	0	0	0	0
chr10	102894743	102895343	102895180	102895323	143	5	0	0											1										0	0	143		0	0	0	0	0	0	0	0	0	0	143	0	0	0	0	0	0
chr10	102894743	102895343	102895181	102895331	150	5	0	0														1							0	0	150		0	0	0	0	0	0	0	0	0	0	0	0	0	150	0	0	0
chr10	102894743	102895343	102895182	102895301	119	5	0	0																1					0	0	119		0	0	0	0	0	0	0	0	0	0	0	0	0	0	0	119	0
chr10	102894743	102895343	102895187	102895278	91	5	0	0	1																				0	0	91		91	0	0	0	0	0	0	0	0	0	0	0	0	0	0	0	0
chr10	102894743	102895343	102895190	102895311	121	5	0	0			1																		0	0	121		0	0	121	0	0	0	0	0	0	0	0	0	0	0	0	0	0
chr10	102894743	102895343	102895190	102895316	126	5	0	0													1								0	0	126		0	0	0	0	0	0	0	0	0	0	0	0	126	0	0	0	0
chr10	102894743	102895343	102895190	102895461	240	6	0	0																			1		0	118	122		0	0	0	0	0	0	0	0	0	0	0	0	0	0	0	0	0
chr10	102894743	102895343	102895191	102895340	149	3	1	0.25	1																				0	0	149		149	0	0	0	0	0	0	0	0	0	0	0	0	0	0	0	0
chr10	102894743	102895343	102895191	102895340	149	4	0	0															1						0	0	149		0	0	0	0	0	0	0	0	0	0	0	0	0	0	149	0	0
chr10	102894743	102895343	102895201	102895238	37	2	0	0		1																			0	0	37		0	37	0	0	0	0	0	0	0	0	0	0	0	0	0	0	0
chr10	102894743	102895343	102895207	102895298	91	4	0	0	1																				0	0	91		91	0	0	0	0	0	0	0	0	0	0	0	0	0	0	0	0
chr10	102894743	102895343	102895207	102895335	128	2	2	0.5									1												0	0	128		0	0	0	0	0	0	0	0	128	0	0	0	0	0	0	0	0
chr10	102894743	102895343	102895208	102895254	46	1	1	0.5	1																				0	0	46		46	0	0	0	0	0	0	0	0	0	0	0	0	0	0	0	0
chr10	102894743	102895343	102895208	102895292	84	4	0	0	1																				0	0	84		84	0	0	0	0	0	0	0	0	0	0	0	0	0	0	0	0
chr10	102894743	102895343	102895209	102895300	91	1	3	0.75	1																				0	0	91		91	0	0	0	0	0	0	0	0	0	0	0	0	0	0	0	0
chr10	102894743	102895343	102895209	102895394	185	3	1	0.25	1																				0	51	134		134	0	0	0	0	0	0	0	0	0	0	0	0	0	0	0	0
chr10	102894743	102895343	102895209	102895455	240	5	0	0											1										0	112	128		0	0	0	0	0	0	0	0	0	0	128	0	0	0	0	0	0
chr10	102894743	102895343	102895211	102895331	120	4	0	0																	1				0	0	120		0	0	0	0	0	0	0	0	0	0	0	0	0	0	0	0	120
chr10	102894743	102895343	102895212	102895390	178	3	1	0.25		1																			0	47	131		0	131	0	0	0	0	0	0	0	0	0	0	0	0	0	0	0
chr10	102894743	102895343	102895213	102895300	87	4	0	0	1																				0	0	87		87	0	0	0	0	0	0	0	0	0	0	0	0	0	0	0	0
chr10	102894743	102895343	102895213	102895394	181	4	0	0	1																				0	51	130		130	0	0	0	0	0	0	0	0	0	0	0	0	0	0	0	0
chr10	102894743	102895343	102895217	102895396	179	3	0	0	1																				0	53	126		126	0	0	0	0	0	0	0	0	0	0	0	0	0	0	0	0
chr10	102894743	102895343	102895218	102895308	90	3	0	0	1																				0	0	90		90	0	0	0	0	0	0	0	0	0	0	0	0	0	0	0	0
chr10	102894743	102895343	102895218	102895400	182	3	0	0	1																				0	57	125		125	0	0	0	0	0	0	0	0	0	0	0	0	0	0	0	0
chr10	102894743	102895343	102895219	102895394	175	2	1	0.333333	1																				0	51	124		124	0	0	0	0	0	0	0	0	0	0	0	0	0	0	0	0
chr10	102894743	102895343	102895219	102895396	177	3	0	0	1																				0	53	124		124	0	0	0	0	0	0	0	0	0	0	0	0	0	0	0	0
chr10	102894743	102895343	102895220	102895362	142	3	0	0															1						0	19	123		0	0	0	0	0	0	0	0	0	0	0	0	0	0	123	0	0
chr10	102894743	102895343	102895221	102895373	152	2	1	0.333333																		1			0	30	122		0	0	0	0	0	0	0	0	0	0	0	0	0	0	0	0	0
chr10	102894743	102895343	102895225	102895295	70	3	0	0		1																			0	0	70		0	70	0	0	0	0	0	0	0	0	0	0	0	0	0	0	0
chr10	102894743	102895343	102895228	102895370	142	3	0	0											1										0	27	115		0	0	0	0	0	0	0	0	0	0	115	0	0	0	0	0	0
chr10	102894743	102895343	102895229	102895338	109	3	0	0								1													0	0	109		0	0	0	0	0	0	0	109	0	0	0	0	0	0	0	0	0
chr10	102894743	102895343	102895229	102895360	131	3	0	0								1													0	17	114		0	0	0	0	0	0	0	114	0	0	0	0	0	0	0	0	0
chr10	102894743	102895343	102895232	102895380	148	1	1	0.5								1													0	37	111		0	0	0	0	0	0	0	111	0	0	0	0	0	0	0	0	0
chr10	102894743	102895343	102895234	102895293	59	0	2	1	1																				0	0	59		59	0	0	0	0	0	0	0	0	0	0	0	0	0	0	0	0
chr10	102894743	102895343	102895234	102895299	65	2	0	0	1																				0	0	65		65	0	0	0	0	0	0	0	0	0	0	0	0	0	0	0	0
chr10	102894743	102895343	102895234	102895379	145	2	0	0							1														0	36	109		0	0	0	0	0	0	109	0	0	0	0	0	0	0	0	0	0
chr10	102894743	102895343	102895234	102895380	146	2	0	0			1																		0	37	109		0	0	109	0	0	0	0	0	0	0	0	0	0	0	0	0	0
chr10	102894743	102895343	102895238	102895373	135	2	0	0							1														0	30	105		0	0	0	0	0	0	105	0	0	0	0	0	0	0	0	0	0
chr10	102894743	102895343	102895238	102895381	143	2	0	0								1													0	38	105		0	0	0	0	0	0	0	105	0	0	0	0	0	0	0	0	0
chr10	102894743	102895343	102895240	102895397	157	2	0	0																		1			0	54	103		0	0	0	0	0	0	0	0	0	0	0	0	0	0	0	0	0
chr10	102894743	102895343	102895241	102895338	97	1	1	0.5		1																			0	0	97		0	97	0	0	0	0	0	0	0	0	0	0	0	0	0	0	0
chr10	102894743	102895343	102895241	102895354	113	2	0	0	1																				0	11	102		102	0	0	0	0	0	0	0	0	0	0	0	0	0	0	0	0
chr10	102894743	102895343	102895241	102895355	114	2	0	0														1							0	12	102		0	0	0	0	0	0	0	0	0	0	0	0	0	102	0	0	0
chr10	102894743	102895343	102895241	102895371	130	2	0	0																1					0	28	102		0	0	0	0	0	0	0	0	0	0	0	0	0	0	0	102	0
chr10	102894743	102895343	102895241	102895383	142	2	0	0																	1				0	40	102		0	0	0	0	0	0	0	0	0	0	0	0	0	0	0	0	102
chr10	102894743	102895343	102895241	102895397	156	2	0	0					1																0	54	102		0	0	0	0	102	0	0	0	0	0	0	0	0	0	0	0	0
chr10	102894743	102895343	102895241	102895411	170	2	0	0														1							0	68	102		0	0	0	0	0	0	0	0	0	0	0	0	0	102	0	0	0
chr10	102894743	102895343	102895241	102895452	211	3	0	0																		1			0	109	102		0	0	0	0	0	0	0	0	0	0	0	0	0	0	0	0	0
chr10	102894743	102895343	102895242	102895371	129	1	1	0.5												1									0	28	101		0	0	0	0	0	0	0	0	0	0	0	101	0	0	0	0	0
chr10	102894743	102895343	102895242	102895381	139	1	1	0.5														1							0	38	101		0	0	0	0	0	0	0	0	0	0	0	0	0	101	0	0	0
chr10	102894743	102895343	102895246	102895398	152	1	1	0.5																		1			0	55	97		0	0	0	0	0	0	0	0	0	0	0	0	0	0	0	0	0
chr10	102894743	102895343	102895248	102895357	109	2	0	0															1						0	14	95		0	0	0	0	0	0	0	0	0	0	0	0	0	0	95	0	0
chr10	102894743	102895343	102895249	102895394	145	2	0	0	1																				0	51	94		94	0	0	0	0	0	0	0	0	0	0	0	0	0	0	0	0
chr10	102894743	102895343	102895249	102895395	146	2	0	0																1					0	52	94		0	0	0	0	0	0	0	0	0	0	0	0	0	0	0	94	0
chr10	102894743	102895343	102895250	102895396	146	2	0	0										1											0	53	93		0	0	0	0	0	0	0	0	0	93	0	0	0	0	0	0	0
chr10	102894743	102895343	102895250	102895454	204	3	0	0										1											0	111	93		0	0	0	0	0	0	0	0	0	93	0	0	0	0	0	0	0
chr10	102894743	102895343	102895251	102895300	49	2	0	0		1																			0	0	49		0	49	0	0	0	0	0	0	0	0	0	0	0	0	0	0	0
chr10	102894743	102895343	102895251	102895393	142	2	0	0																1					0	50	92		0	0	0	0	0	0	0	0	0	0	0	0	0	0	0	92	0
chr10	102894743	102895343	102895253	102895293	40	2	0	0		1																			0	0	40		0	40	0	0	0	0	0	0	0	0	0	0	0	0	0	0	0
chr10	102894743	102895343	102895255	102895393	138	2	0	0																1					0	50	88		0	0	0	0	0	0	0	0	0	0	0	0	0	0	0	88	0
chr10	102894743	102895343	102895256	102895376	120	2	0	0													1								0	33	87		0	0	0	0	0	0	0	0	0	0	0	0	87	0	0	0	0
chr10	102894743	102895343	102895256	102895395	139	2	0	0																	1				0	52	87		0	0	0	0	0	0	0	0	0	0	0	0	0	0	0	0	87
chr10	102894743	102895343	102895256	102895397	141	2	0	0									1												0	54	87		0	0	0	0	0	0	0	0	87	0	0	0	0	0	0	0	0
chr10	102894743	102895343	102895256	102895400	144	2	0	0																		1			0	57	87		0	0	0	0	0	0	0	0	0	0	0	0	0	0	0	0	0
chr10	102894743	102895343	102895258	102895301	43	1	0	0	1																				0	0	43		43	0	0	0	0	0	0	0	0	0	0	0	0	0	0	0	0
chr10	102894743	102895343	102895258	102895459	201	2	0	0															1						0	116	85		0	0	0	0	0	0	0	0	0	0	0	0	0	0	85	0	0
chr10	102894743	102895343	102895259	102895396	137	1	0	0									1												0	53	84		0	0	0	0	0	0	0	0	84	0	0	0	0	0	0	0	0
chr10	102894743	102895343	102895260	102895381	121	1	0	0										1											0	38	83		0	0	0	0	0	0	0	0	0	83	0	0	0	0	0	0	0
chr10	102894743	102895343	102895260	102895397	137	1	0	0														1							0	54	83		0	0	0	0	0	0	0	0	0	0	0	0	0	83	0	0	0
chr10	102894743	102895343	102895261	102895400	139	1	0	0																		1			0	57	82		0	0	0	0	0	0	0	0	0	0	0	0	0	0	0	0	0
chr10	102894743	102895343	102895261	102895435	174	2	0	0							1														0	92	82		0	0	0	0	0	0	82	0	0	0	0	0	0	0	0	0	0
chr10	102894743	102895343	102895262	102895371	109	1	0	0								1													0	28	81		0	0	0	0	0	0	0	81	0	0	0	0	0	0	0	0	0
chr10	102894743	102895343	102895262	102895396	134	1	0	0	1																				0	53	81		81	0	0	0	0	0	0	0	0	0	0	0	0	0	0	0	0
chr10	102894743	102895343	102895265	102895400	135	1	0	0					1																0	57	78		0	0	0	0	78	0	0	0	0	0	0	0	0	0	0	0	0
chr10	102894743	102895343	102895268	102895338	70	1	0	0	1																				0	0	70		70	0	0	0	0	0	0	0	0	0	0	0	0	0	0	0	0
chr10	102894743	102895343	102895269	102895381	112	1	0	0									1												0	38	74		0	0	0	0	0	0	0	0	74	0	0	0	0	0	0	0	0
chr10	102894743	102895343	102895271	102895340	69	1	0	0		1																			0	0	69		0	69	0	0	0	0	0	0	0	0	0	0	0	0	0	0	0
chr10	102894743	102895343	102895271	102895381	110	1	0	0												1									0	38	72		0	0	0	0	0	0	0	0	0	0	0	72	0	0	0	0	0
chr10	102894743	102895343	102895271	102895404	133	1	0	0															1						0	61	72		0	0	0	0	0	0	0	0	0	0	0	0	0	0	72	0	0
chr10	102894743	102895343	102895272	102895379	107	1	0	0			1																		0	36	71		0	0	71	0	0	0	0	0	0	0	0	0	0	0	0	0	0
chr10	102894743	102895343	102895272	102895390	118	1	0	0													1								0	47	71		0	0	0	0	0	0	0	0	0	0	0	0	71	0	0	0	0
chr10	102894743	102895343	102895272	102895393	121	1	0	0																			1		0	50	71		0	0	0	0	0	0	0	0	0	0	0	0	0	0	0	0	0
chr10	102894743	102895343	102895272	102895400	128	1	0	0						1															0	57	71		0	0	0	0	0	71	0	0	0	0	0	0	0	0	0	0	0
chr10	102894743	102895343	102895272	102895403	131	0	1	1													1								0	60	71		0	0	0	0	0	0	0	0	0	0	0	0	71	0	0	0	0
chr10	102894743	102895343	102895272	102895412	140	1	0	0				1												1					0	69	71		0	0	0	71	0	0	0	0	0	0	0	0	0	0	0	71	0
chr10	102894743	102895343	102895273	102895393	120	1	0	0															1						0	50	70		0	0	0	0	0	0	0	0	0	0	0	0	0	0	70	0	0
chr10	102894743	102895343	102895273	102895394	121	1	0	0															1						0	51	70		0	0	0	0	0	0	0	0	0	0	0	0	0	0	70	0	0
chr10	102894743	102895343	102895273	102895411	138	1	0	0					1																0	68	70		0	0	0	0	70	0	0	0	0	0	0	0	0	0	0	0	0
chr10	102894743	102895343	102895280	102895438	158	1	0	0				1																	0	95	63		0	0	0	63	0	0	0	0	0	0	0	0	0	0	0	0	0
chr10	102894743	102895343	102895285	102895433	148	1	0	0							1														0	90	58		0	0	0	0	0	0	58	0	0	0	0	0	0	0	0	0	0
chr10	102894743	102895343	102895296	102895445	149	0	1	1																			1		0	102	47		0	0	0	0	0	0	0	0	0	0	0	0	0	0	0	0	0
chr10	102894743	102895343	102895296	102895451	155	1	0	0														1							0	108	47		0	0	0	0	0	0	0	0	0	0	0	0	0	47	0	0	0
chr10	102894743	102895343	102895296	102895452	156	1	0	0																	1				0	109	47		0	0	0	0	0	0	0	0	0	0	0	0	0	0	0	0	47
chr10	102894743	102895343	102895297	102895439	142	1	0	0															1						0	96	46		0	0	0	0	0	0	0	0	0	0	0	0	0	0	46	0	0
chr10	102894743	102895343	102895298	102895459	161	1	0	0													1								0	116	45		0	0	0	0	0	0	0	0	0	0	0	0	45	0	0	0	0
chr10	102894743	102895343	102895300	102895453	153	1	0	0																			1		0	110	43		0	0	0	0	0	0	0	0	0	0	0	0	0	0	0	0	0
chr10	102894743	102895343	102895303	102895449	146	1	0	0									1												0	106	40		0	0	0	0	0	0	0	0	40	0	0	0	0	0	0	0	0
chr10	102894743	102895343	102895305	102895459	154	1	0	0			1																		0	116	38		0	0	38	0	0	0	0	0	0	0	0	0	0	0	0	0	0
chr10	102894743	102895343	102895306	102895440	134	1	0	0										1											0	97	37		0	0	0	0	0	0	0	0	0	37	0	0	0	0	0	0	0
chr10	102894743	102895343	102895306	102895450	144	1	0	0														1							0	107	37		0	0	0	0	0	0	0	0	0	0	0	0	0	37	0	0	0
chr10	102894743	102895343	102895306	102895451	145	1	0	0													1								0	108	37		0	0	0	0	0	0	0	0	0	0	0	0	37	0	0	0	0
chr10	102894743	102895343	102895309	102895452	143	1	0	0										1											0	109	34		0	0	0	0	0	0	0	0	0	34	0	0	0	0	0	0	0
chr10	102894743	102895343	102895310	102895452	142	1	0	0															1						0	109	33		0	0	0	0	0	0	0	0	0	0	0	0	0	0	33	0	0
chr10	102894743	102895343	102895315	102895435	120	1	0	0									1				1								0	92	28		0	0	0	0	0	0	0	0	28	0	0	0	28	0	0	0	0
chr10	102894743	102895343	102895315	102895452	137	1	0	0																	1				0	109	28		0	0	0	0	0	0	0	0	0	0	0	0	0	0	0	0	28
chr10	102894743	102895343	102895316	102895436	120	1	0	0													1								0	93	27		0	0	0	0	0	0	0	0	0	0	0	0	27	0	0	0	0
chr10	102894743	102895343	102895318	102895444	126	1	0	0															1						0	101	25		0	0	0	0	0	0	0	0	0	0	0	0	0	0	25	0	0
chr10	102894743	102895343	102895318	102895461	143	1	0	0										1											0	118	25		0	0	0	0	0	0	0	0	0	25	0	0	0	0	0	0	0
chr10	102894743	102895343	102895318	102895462	144	1	0	0															1						0	119	25		0	0	0	0	0	0	0	0	0	0	0	0	0	0	25	0	0
chr10	102894743	102895343	102895321	102895438	117	1	0	0												1									0	95	22		0	0	0	0	0	0	0	0	0	0	0	22	0	0	0	0	0
chr10	102894743	102895343	102895321	102895442	121	1	0	0				1																	0	99	22		0	0	0	22	0	0	0	0	0	0	0	0	0	0	0	0	0
chr10	102894743	102895343	102895321	102895454	133	1	0	0											1										0	111	22		0	0	0	0	0	0	0	0	0	0	22	0	0	0	0	0	0
chr10	102894743	102895343	102895322	102895446	124	1	0	0																	1				0	103	21		0	0	0	0	0	0	0	0	0	0	0	0	0	0	0	0	21
chr10	102894743	102895343	102895323	102895448	125	0	1	1											1										0	105	20		0	0	0	0	0	0	0	0	0	0	20	0	0	0	0	0	0
chr10	102894743	102895343	102895323	102895461	138	1	0	0																	1				0	118	20		0	0	0	0	0	0	0	0	0	0	0	0	0	0	0	0	20
chr10	102894743	102895343	102895324	102895443	119	1	0	0							1														0	100	19		0	0	0	0	0	0	19	0	0	0	0	0	0	0	0	0	0
chr10	102894743	102895343	102895327	102895453	126	1	0	0							1														0	110	16		0	0	0	0	0	0	16	0	0	0	0	0	0	0	0	0	0
chr10	102894743	102895343	102895328	102895451	123	1	0	0							1														0	108	15		0	0	0	0	0	0	15	0	0	0	0	0	0	0	0	0	0
chr10	102894743	102895343	102895329	102895442	113	0	1	1																1					0	99	14		0	0	0	0	0	0	0	0	0	0	0	0	0	0	0	14	0
chr10	102894743	102895343	102895329	102895446	117	1	0	0													1								0	103	14		0	0	0	0	0	0	0	0	0	0	0	0	14	0	0	0	0
chr10	102894743	102895343	102895329	102895455	126	1	0	0													1								0	112	14		0	0	0	0	0	0	0	0	0	0	0	0	14	0	0	0	0
chr10	102894743	102895343	102895330	102895459	129	0	1	1								1													0	116	13		0	0	0	0	0	0	0	13	0	0	0	0	0	0	0	0	0
chr10	102894743	102895343	102895334	102895449	115	0	1	1								1													0	106	9		0	0	0	0	0	0	0	9	0	0	0	0	0	0	0	0	0
chr10	102894743	102895343	102895336	102895457	121	0	1	1													1								0	114	7		0	0	0	0	0	0	0	0	0	0	0	0	7	0	0	0	0
chr10	102894743	102895343	102895337	102895458	121	0	1	1		1																			0	115	6		0	6	0	0	0	0	0	0	0	0	0	0	0	0	0	0	0
chr10	102894743	102895343	102895339	102895448	109	1	0	0									1												0	105	4		0	0	0	0	0	0	0	0	4	0	0	0	0	0	0	0	0
chr10	102894743	102895343	102895339	102895459	120	1	0	0																		1			0	116	4		0	0	0	0	0	0	0	0	0	0	0	0	0	0	0	0	0
chr10	102894743	102895343	102895340	102895461	121	1	0	0	1																				0	118	3		3	0	0	0	0	0	0	0	0	0	0	0	0	0	0	0	0
chr10	102894743	102895343	102895341	102895447	106	1	0	0																1					0	104	2		0	0	0	0	0	0	0	0	0	0	0	0	0	0	0	2	0
									121	97	34	34	22	27	36	34	27	38	33	38	42	38	40	43	45	33	37						12666	10150	3598	4201	2511	3472	4131	3937	3130	4193	4121	4424	4029	3994	4557	5102	5038
																																	21.11	16.9167	5.99667	7.00167	4.185	5.78667	6.885	6.56167	5.21667	6.98833	6.86833	7.37333	6.715	6.65667	7.595	8.50333	8.39667
																																average liver tissue
																																19.0133
																																average lung tumor cfDNA
																																6.16556
																																average normal CfDNA
																																7.28056
																																average liver cfDNA
																																5.668
[truncated: 3 more columns]

## Sheet: UCLA_ZNF
chr	interval_start	interval_stop	methSeqStart	methSeqStop	methSeqLength	numU	numM	MD	HCC1	HCC2	L948	L954	L955	L962	L964	L978	L982	L987	L989	LIC1L	LIC2L	LIC3L	LIC4L	N1L	N2L	N3L	N4L		clipFromStart	clipFromStop	useFragLen		HCC1	HCC2	L948	L954	L955	L962	L964	L978	L982	L987	L989	LIC1L	LIC2L	LIC3L	LIC4L	N1L	N2L
chr19	58220194	58220794	58220076	58220197	121	11	1	0.0833333											1									600	118	0	3		0	0	0	0	0	0	0	0	0	0	3	0	0	0	0	0	0
chr19	58220194	58220794	58220076	58220212	136	13	0	0								1												600	118	0	18		0	0	0	0	0	0	0	18	0	0	0	0	0	0	0	0	0
chr19	58220194	58220794	58220078	58220211	133	3	10	0.769231	1																			600	116	0	17		17	0	0	0	0	0	0	0	0	0	0	0	0	0	0	0	0
chr19	58220194	58220794	58220079	58220198	119	12	0	0																1				600	115	0	4		0	0	0	0	0	0	0	0	0	0	0	0	0	0	0	4	0
chr19	58220194	58220794	58220080	58220202	122	12	0	0																	1			600	114	0	8		0	0	0	0	0	0	0	0	0	0	0	0	0	0	0	0	8
chr19	58220194	58220794	58220082	58220203	121	11	0	0																1				600	112	0	9		0	0	0	0	0	0	0	0	0	0	0	0	0	0	0	9	0
chr19	58220194	58220794	58220083	58220204	121	2	9	0.818182	1																			600	111	0	10		10	0	0	0	0	0	0	0	0	0	0	0	0	0	0	0	0
chr19	58220194	58220794	58220086	58220207	121	4	7	0.636364		1																		600	108	0	13		0	13	0	0	0	0	0	0	0	0	0	0	0	0	0	0	0
chr19	58220194	58220794	58220086	58220207	121	11	0	0													1							600	108	0	13		0	0	0	0	0	0	0	0	0	0	0	0	13	0	0	0	0
chr19	58220194	58220794	58220088	58220208	120	0	11	1		1																		600	106	0	14		0	14	0	0	0	0	0	0	0	0	0	0	0	0	0	0	0
chr19	58220194	58220794	58220088	58220208	120	1	10	0.909091	1																			600	106	0	14		14	0	0	0	0	0	0	0	0	0	0	0	0	0	0	0	0
chr19	58220194	58220794	58220088	58220209	121	0	12	1		1																		600	106	0	15		0	15	0	0	0	0	0	0	0	0	0	0	0	0	0	0	0
chr19	58220194	58220794	58220088	58220209	121	3	9	0.75	1																			600	106	0	15		15	0	0	0	0	0	0	0	0	0	0	0	0	0	0	0	0
chr19	58220194	58220794	58220089	58220209	120	0	12	1	1																			600	105	0	15		15	0	0	0	0	0	0	0	0	0	0	0	0	0	0	0	0
chr19	58220194	58220794	58220089	58220210	121	4	8	0.666667	1																			600	105	0	16		16	0	0	0	0	0	0	0	0	0	0	0	0	0	0	0	0
chr19	58220194	58220794	58220091	58220211	120	3	9	0.75	1																			600	103	0	17		17	0	0	0	0	0	0	0	0	0	0	0	0	0	0	0	0
chr19	58220194	58220794	58220092	58220200	108	11	0	0												1								600	102	0	6		0	0	0	0	0	0	0	0	0	0	0	6	0	0	0	0	0
chr19	58220194	58220794	58220094	58220215	121	12	0	0																			1	600	100	0	21		0	0	0	0	0	0	0	0	0	0	0	0	0	0	0	0	0
chr19	58220194	58220794	58220095	58220215	120	10	1	0.0909091																			1	600	99	0	21		0	0	0	0	0	0	0	0	0	0	0	0	0	0	0	0	0
chr19	58220194	58220794	58220096	58220266	170	16	0	0						1														600	98	0	72		0	0	0	0	0	72	0	0	0	0	0	0	0	0	0	0	0
chr19	58220194	58220794	58220099	58220251	152	12	3	0.2					1															600	95	0	57		0	0	0	0	57	0	0	0	0	0	0	0	0	0	0	0	0
chr19	58220194	58220794	58220100	58220236	136	1	13	0.928571		1																		600	94	0	42		0	42	0	0	0	0	0	0	0	0	0	0	0	0	0	0	0
chr19	58220194	58220794	58220100	58220275	175	16	0	0						1														600	94	0	81		0	0	0	0	0	81	0	0	0	0	0	0	0	0	0	0	0
chr19	58220194	58220794	58220101	58220243	142	1	13	0.928571															1					600	93	0	49		0	0	0	0	0	0	0	0	0	0	0	0	0	0	49	0	0
chr19	58220194	58220794	58220102	58220211	109	2	8	0.8		1																		600	92	0	17		0	17	0	0	0	0	0	0	0	0	0	0	0	0	0	0	0
chr19	58220194	58220794	58220102	58220268	166	15	0	0							1													600	92	0	74		0	0	0	0	0	0	74	0	0	0	0	0	0	0	0	0	0
chr19	58220194	58220794	58220103	58220229	126	3	8	0.727273	1																			600	91	0	35		35	0	0	0	0	0	0	0	0	0	0	0	0	0	0	0	0
chr19	58220194	58220794	58220103	58220234	131	12	0	0												1								600	91	0	40		0	0	0	0	0	0	0	0	0	0	0	40	0	0	0	0	0
chr19	58220194	58220794	58220103	58220242	139	3	10	0.769231		1																		600	91	0	48		0	48	0	0	0	0	0	0	0	0	0	0	0	0	0	0	0
chr19	58220194	58220794	58220104	58220244	140	13	0	0														1						600	90	0	50		0	0	0	0	0	0	0	0	0	0	0	0	0	50	0	0	0
chr19	58220194	58220794	58220106	58220238	132	12	0	0													1							600	88	0	44		0	0	0	0	0	0	0	0	0	0	0	0	44	0	0	0	0
chr19	58220194	58220794	58220106	58220276	170	14	0	0							1													600	88	0	82		0	0	0	0	0	0	82	0	0	0	0	0	0	0	0	0	0
chr19	58220194	58220794	58220107	58220228	121	11	0	0							1													600	87	0	34		0	0	0	0	0	0	34	0	0	0	0	0	0	0	0	0	0
chr19	58220194	58220794	58220107	58220379	241	21	1	0.0454545												1								600	87	0	154		0	0	0	0	0	0	0	0	0	0	0	154	0	0	0	0	0
chr19	58220194	58220794	58220109	58220244	135	12	1	0.0769231												1								600	85	0	50		0	0	0	0	0	0	0	0	0	0	0	50	0	0	0	0	0
chr19	58220194	58220794	58220110	58220231	121	11	0	0													1							600	84	0	37		0	0	0	0	0	0	0	0	0	0	0	0	37	0	0	0	0
chr19	58220194	58220794	58220114	58220234	120	11	0	0																		1		600	80	0	40		0	0	0	0	0	0	0	0	0	0	0	0	0	0	0	0	0
chr19	58220194	58220794	58220114	58220234	120	12	0	0									1											600	80	0	40		0	0	0	0	0	0	0	0	40	0	0	0	0	0	0	0	0
chr19	58220194	58220794	58220117	58220267	150	13	1	0.0714286																		1		600	77	0	73		0	0	0	0	0	0	0	0	0	0	0	0	0	0	0	0	0
chr19	58220194	58220794	58220119	58220412	241	21	2	0.0869565																1				600	75	0	166		0	0	0	0	0	0	0	0	0	0	0	0	0	0	0	166	0
chr19	58220194	58220794	58220120	58220226	106	10	0	0								1												600	74	0	32		0	0	0	0	0	0	0	32	0	0	0	0	0	0	0	0	0
chr19	58220194	58220794	58220120	58220252	132	12	0	0																			1	600	74	0	58		0	0	0	0	0	0	0	0	0	0	0	0	0	0	0	0	0
chr19	58220194	58220794	58220121	58220287	166	12	0	0			1																	600	73	0	93		0	0	93	0	0	0	0	0	0	0	0	0	0	0	0	0	0
chr19	58220194	58220794	58220121	58220309	188	2	13	0.866667		1																		600	73	0	115		0	115	0	0	0	0	0	0	0	0	0	0	0	0	0	0	0
chr19	58220194	58220794	58220121	58220320	199	16	0	0	1																			600	73	0	126		126	0	0	0	0	0	0	0	0	0	0	0	0	0	0	0	0
chr19	58220194	58220794	58220121	58220460	242	22	0	0													1							600	73	0	169		0	0	0	0	0	0	0	0	0	0	0	0	169	0	0	0	0
chr19	58220194	58220794	58220123	58220247	124	11	0	0											1									600	71	0	53		0	0	0	0	0	0	0	0	0	0	53	0	0	0	0	0	0
chr19	58220194	58220794	58220125	58220272	147	11	0	0			1																	600	69	0	78		0	0	78	0	0	0	0	0	0	0	0	0	0	0	0	0	0
chr19	58220194	58220794	58220126	58220246	120	10	0	0																1				600	68	0	52		0	0	0	0	0	0	0	0	0	0	0	0	0	0	0	52	0
chr19	58220194	58220794	58220126	58220294	168	12	0	0							1													600	68	0	100		0	0	0	0	0	0	100	0	0	0	0	0	0	0	0	0	0
chr19	58220194	58220794	58220127	58220247	120	10	0	0									1											600	67	0	53		0	0	0	0	0	0	0	0	53	0	0	0	0	0	0	0	0
chr19	58220194	58220794	58220127	58220252	125	10	0	0		1																		600	67	0	58		0	58	0	0	0	0	0	0	0	0	0	0	0	0	0	0	0
chr19	58220194	58220794	58220127	58220254	127	4	6	0.6		1																		600	67	0	60		0	60	0	0	0	0	0	0	0	0	0	0	0	0	0	0	0
chr19	58220194	58220794	58220127	58220259	132	2	8	0.8	1																			600	67	0	65		65	0	0	0	0	0	0	0	0	0	0	0	0	0	0	0	0
chr19	58220194	58220794	58220128	58220210	82	2	5	0.714286		1																		600	66	0	16		0	16	0	0	0	0	0	0	0	0	0	0	0	0	0	0	0
chr19	58220194	58220794	58220128	58220248	120	10	0	0											1									600	66	0	54		0	0	0	0	0	0	0	0	0	0	54	0	0	0	0	0	0
chr19	58220194	58220794	58220128	58220265	137	11	0	0												1								600	66	0	71		0	0	0	0	0	0	0	0	0	0	0	71	0	0	0	0	0
chr19	58220194	58220794	58220129	58220204	75	1	5	0.833333	1																			600	65	0	10		10	0	0	0	0	0	0	0	0	0	0	0	0	0	0	0	0
chr19	58220194	58220794	58220129	58220209	80	3	4	0.571429		1																		600	65	0	15		0	15	0	0	0	0	0	0	0	0	0	0	0	0	0	0	0
chr19	58220194	58220794	58220129	58220252	123	2	8	0.8		1																		600	65	0	58		0	58	0	0	0	0	0	0	0	0	0	0	0	0	0	0	0
chr19	58220194	58220794	58220129	58220271	142	11	0	0							1													600	65	0	77		0	0	0	0	0	0	77	0	0	0	0	0	0	0	0	0	0
chr19	58220194	58220794	58220129	58220295	166	11	1	0.0833333				1																600	65	0	101		0	0	0	101	0	0	0	0	0	0	0	0	0	0	0	0	0
chr19	58220194	58220794	58220130	58220211	81	4	3	0.428571		1																		600	64	0	17		0	17	0	0	0	0	0	0	0	0	0	0	0	0	0	0	0
chr19	58220194	58220794	58220130	58220374	242	3	17	0.85		1																		600	64	0	178		0	178	0	0	0	0	0	0	0	0	0	0	0	0	0	0	0
chr19	58220194	58220794	58220131	58220211	80	2	5	0.714286		1																		600	63	0	17		0	17	0	0	0	0	0	0	0	0	0	0	0	0	0	0	0
chr19	58220194	58220794	58220131	58220308	177	14	0	0																	1			600	63	0	114		0	0	0	0	0	0	0	0	0	0	0	0	0	0	0	0	114
chr19	58220194	58220794	58220132	58220277	145	11	0	0			1																	600	62	0	83		0	0	83	0	0	0	0	0	0	0	0	0	0	0	0	0	0
chr19	58220194	58220794	58220132	58220303	171	14	0	0								1												600	62	0	109		0	0	0	0	0	0	0	109	0	0	0	0	0	0	0	0	0
chr19	58220194	58220794	58220133	58220267	134	10	0	0				1																600	61	0	73		0	0	0	73	0	0	0	0	0	0	0	0	0	0	0	0	0
chr19	58220194	58220794	58220133	58220268	135	10	0	0														1						600	61	0	74		0	0	0	0	0	0	0	0	0	0	0	0	0	74	0	0	0
chr19	58220194	58220794	58220133	58220275	142	9	1	0.1				1																600	61	0	81		0	0	0	81	0	0	0	0	0	0	0	0	0	0	0	0	0
chr19	58220194	58220794	58220133	58220287	154	10	0	0				1																600	61	0	93		0	0	0	93	0	0	0	0	0	0	0	0	0	0	0	0	0
chr19	58220194	58220794	58220135	58220256	121	2	7	0.777778	1																			600	59	0	62		62	0	0	0	0	0	0	0	0	0	0	0	0	0	0	0	0
chr19	58220194	58220794	58220135	58220300	165	13	0	0																1				600	59	0	106		0	0	0	0	0	0	0	0	0	0	0	0	0	0	0	106	0
chr19	58220194	58220794	58220135	58220395	239	16	4	0.2					1															600	59	0	180		0	0	0	0	180	0	0	0	0	0	0	0	0	0	0	0	0
chr19	58220194	58220794	58220136	58220300	164	13	0	0											1									600	58	0	106		0	0	0	0	0	0	0	0	0	0	106	0	0	0	0	0	0
chr19	58220194	58220794	58220138	58220259	121	9	0	0																1				600	56	0	65		0	0	0	0	0	0	0	0	0	0	0	0	0	0	0	65	0
chr19	58220194	58220794	58220138	58220402	241	20	0	0											1									600	56	0	185		0	0	0	0	0	0	0	0	0	0	185	0	0	0	0	0	0
chr19	58220194	58220794	58220140	58220402	240	20	0	0											1									600	54	0	186		0	0	0	0	0	0	0	0	0	0	186	0	0	0	0	0	0
chr19	58220194	58220794	58220142	58220321	179	13	0	0	1																			600	52	0	127		127	0	0	0	0	0	0	0	0	0	0	0	0	0	0	0	0
chr19	58220194	58220794	58220144	58220319	175	12	1	0.0769231																			1	600	50	0	125		0	0	0	0	0	0	0	0	0	0	0	0	0	0	0	0	0
chr19	58220194	58220794	58220145	58220265	120	9	0	0													1							600	49	0	71		0	0	0	0	0	0	0	0	0	0	0	0	71	0	0	0	0
chr19	58220194	58220794	58220145	58220266	121	8	1	0.111111				1																600	49	0	72		0	0	0	72	0	0	0	0	0	0	0	0	0	0	0	0	0
chr19	58220194	58220794	58220145	58220280	135	9	0	0							1													600	49	0	86		0	0	0	0	0	0	86	0	0	0	0	0	0	0	0	0	0
chr19	58220194	58220794	58220145	58220281	136	9	0	0				1																600	49	0	87		0	0	0	87	0	0	0	0	0	0	0	0	0	0	0	0	0
chr19	58220194	58220794	58220145	58220291	146	10	0	0								1												600	49	0	97		0	0	0	0	0	0	0	97	0	0	0	0	0	0	0	0	0
chr19	58220194	58220794	58220145	58220295	150	10	0	0																1				600	49	0	101		0	0	0	0	0	0	0	0	0	0	0	0	0	0	0	101	0
chr19	58220194	58220794	58220145	58220303	158	12	0	0								1												600	49	0	109		0	0	0	0	0	0	0	109	0	0	0	0	0	0	0	0	0
chr19	58220194	58220794	58220145	58220349	204	14	0	0										1										600	49	0	155		0	0	0	0	0	0	0	0	0	155	0	0	0	0	0	0	0
chr19	58220194	58220794	58220146	58220305	159	12	0	0						1														600	48	0	111		0	0	0	0	0	111	0	0	0	0	0	0	0	0	0	0	0
chr19	58220194	58220794	58220146	58220307	161	12	0	0											1									600	48	0	113		0	0	0	0	0	0	0	0	0	0	113	0	0	0	0	0	0
chr19	58220194	58220794	58220146	58220426	241	18	1	0.0526316														1						600	48	0	193		0	0	0	0	0	0	0	0	0	0	0	0	0	193	0	0	0
chr19	58220194	58220794	58220148	58220285	137	9	0	0														1						600	46	0	91		0	0	0	0	0	0	0	0	0	0	0	0	0	91	0	0	0
chr19	58220194	58220794	58220149	58220252	103	4	4	0.5		1																		600	45	0	58		0	58	0	0	0	0	0	0	0	0	0	0	0	0	0	0	0
chr19	58220194	58220794	58220149	58220269	120	2	7	0.777778	1																			600	45	0	75		75	0	0	0	0	0	0	0	0	0	0	0	0	0	0	0	0
chr19	58220194	58220794	58220149	58220276	127	9	0	0															1					600	45	0	82		0	0	0	0	0	0	0	0	0	0	0	0	0	0	82	0	0
chr19	58220194	58220794	58220149	58220335	186	14	0	0										1										600	45	0	141		0	0	0	0	0	0	0	0	0	141	0	0	0	0	0	0	0
chr19	58220194	58220794	58220149	58220531	240	21	0	0													1							600	45	0	195		0	0	0	0	0	0	0	0	0	0	0	0	195	0	0	0	0
chr19	58220194	58220794	58220150	58220204	54	1	3	0.75		1																		600	44	0	10		0	10	0	0	0	0	0	0	0	0	0	0	0	0	0	0	0
chr19	58220194	58220794	58220150	58220268	118	2	8	0.8		1																		600	44	0	74		0	74	0	0	0	0	0	0	0	0	0	0	0	0	0	0	0
chr19	58220194	58220794	58220151	58220271	120	3	6	0.666667		1																		600	43	0	77		0	77	0	0	0	0	0	0	0	0	0	0	0	0	0	0	0
chr19	58220194	58220794	58220153	58220249	96	7	0	0																1				600	41	0	55		0	0	0	0	0	0	0	0	0	0	0	0	0	0	0	55	0
chr19	58220194	58220794	58220153	58220301	148	11	1	0.0833333						1														600	41	0	107		0	0	0	0	0	107	0	0	0	0	0	0	0	0	0	0	0
chr19	58220194	58220794	58220154	58220281	127	9	0	0						1														600	40	0	87		0	0	0	0	0	87	0	0	0	0	0	0	0	0	0	0	0
chr19	58220194	58220794	58220159	58220252	93	3	4	0.571429	1																			600	35	0	58		58	0	0	0	0	0	0	0	0	0	0	0	0	0	0	0	0
chr19	58220194	58220794	58220159	58220296	137	9	0	0									1											600	35	0	102		0	0	0	0	0	0	0	0	102	0	0	0	0	0	0	0	0
chr19	58220194	58220794	58220161	58220321	160	12	0	0																1				600	33	0	127		0	0	0	0	0	0	0	0	0	0	0	0	0	0	0	127	0
chr19	58220194	58220794	58220162	58220313	151	11	0	0							1													600	32	0	119		0	0	0	0	0	0	119	0	0	0	0	0	0	0	0	0	0
chr19	58220194	58220794	58220163	58220273	110	7	0	0														1						600	31	0	79		0	0	0	0	0	0	0	0	0	0	0	0	0	79	0	0	0
chr19	58220194	58220794	58220163	58220291	128	8	0	0																		1		600	31	0	97		0	0	0	0	0	0	0	0	0	0	0	0	0	0	0	0	0
chr19	58220194	58220794	58220163	58220294	131	8	0	0				1																600	31	0	100		0	0	0	100	0	0	0	0	0	0	0	0	0	0	0	0	0
chr19	58220194	58220794	58220166	58220208	42	1	1	0.5	1																			600	28	0	14		14	0	0	0	0	0	0	0	0	0	0	0	0	0	0	0	0
chr19	58220194	58220794	58220166	58220289	123	8	0	0										1										600	28	0	95		0	0	0	0	0	0	0	0	0	95	0	0	0	0	0	0	0
chr19	58220194	58220794	58220167	58220296	129	8	0	0			1																	600	27	0	102		0	0	102	0	0	0	0	0	0	0	0	0	0	0	0	0	0
chr19	58220194	58220794	58220168	58220351	183	5	8	0.615385		1																		600	26	0	157		0	157	0	0	0	0	0	0	0	0	0	0	0	0	0	0	0
chr19	58220194	58220794	58220169	58220202	33	2	0	0		1																		600	25	0	8		0	8	0	0	0	0	0	0	0	0	0	0	0	0	0	0	0
chr19	58220194	58220794	58220170	58220257	87	4	2	0.333333		1																		600	24	0	63		0	63	0	0	0	0	0	0	0	0	0	0	0	0	0	0	0
chr19	58220194	58220794	58220170	58220408	238	19	0	0							1													600	24	0	214		0	0	0	0	0	0	214	0	0	0	0	0	0	0	0	0	0
chr19	58220194	58220794	58220171	58220203	32	0	2	1	1																			600	23	0	9		9	0	0	0	0	0	0	0	0	0	0	0	0	0	0	0	0
chr19	58220194	58220794	58220171	58220285	114	7	0	0								1												600	23	0	91		0	0	0	0	0	0	0	91	0	0	0	0	0	0	0	0	0
chr19	58220194	58220794	58220172	58220319	147	7	4	0.363636									1											600	22	0	125		0	0	0	0	0	0	0	0	125	0	0	0	0	0	0	0	0
chr19	58220194	58220794	58220173	58220256	83	1	5	0.833333		1																		600	21	0	62		0	62	0	0	0	0	0	0	0	0	0	0	0	0	0	0	0
chr19	58220194	58220794	58220174	58220209	35	2	1	0.333333		1																		600	20	0	15		0	15	0	0	0	0	0	0	0	0	0	0	0	0	0	0	0
chr19	58220194	58220794	58220174	58220269	95	2	5	0.714286	1																			600	20	0	75		75	0	0	0	0	0	0	0	0	0	0	0	0	0	0	0	0
chr19	58220194	58220794	58220174	58220295	121	3	5	0.625		1																		600	20	0	101		0	101	0	0	0	0	0	0	0	0	0	0	0	0	0	0	0
chr19	58220194	58220794	58220174	58220295	121	8	0	0														1						600	20	0	101		0	0	0	0	0	0	0	0	0	0	0	0	0	101	0	0	0
chr19	58220194	58220794	58220174	58220314	140	10	0	0									1											600	20	0	120		0	0	0	0	0	0	0	0	120	0	0	0	0	0	0	0	0
chr19	58220194	58220794	58220174	58220363	189	3	10	0.769231		1																		600	20	0	169		0	169	0	0	0	0	0	0	0	0	0	0	0	0	0	0	0
chr19	58220194	58220794	58220174	58220374	200	5	11	0.6875	1																			600	20	0	180		180	0	0	0	0	0	0	0	0	0	0	0	0	0	0	0	0
chr19	58220194	58220794	58220174	58220380	206	17	0	0										1										600	20	0	186		0	0	0	0	0	0	0	0	0	186	0	0	0	0	0	0	0
chr19	58220194	58220794	58220176	58220211	35	3	0	0	1																			600	18	0	17		17	0	0	0	0	0	0	0	0	0	0	0	0	0	0	0	0
chr19	58220194	58220794	58220176	58220253	77	4	2	0.333333		1																		600	18	0	59		0	59	0	0	0	0	0	0	0	0	0	0	0	0	0	0	0
chr19	58220194	58220794	58220176	58220268	92	1	6	0.857143		1																		600	18	0	74		0	74	0	0	0	0	0	0	0	0	0	0	0	0	0	0	0
chr19	58220194	58220794	58220176	58220269	93	4	3	0.428571		1																		600	18	0	75		0	75	0	0	0	0	0	0	0	0	0	0	0	0	0	0	0
chr19	58220194	58220794	58220177	58220345	168	3	9	0.75		1																		600	17	0	151		0	151	0	0	0	0	0	0	0	0	0	0	0	0	0	0	0
chr19	58220194	58220794	58220177	58220413	236	19	0	0								1												600	17	0	219		0	0	0	0	0	0	0	219	0	0	0	0	0	0	0	0	0
chr19	58220194	58220794	58220178	58220306	128	9	1	0.1			1																	600	16	0	112		0	0	112	0	0	0	0	0	0	0	0	0	0	0	0	0	0
chr19	58220194	58220794	58220178	58220312	134	10	0	0							1													600	16	0	118		0	0	0	0	0	0	118	0	0	0	0	0	0	0	0	0	0
chr19	58220194	58220794	58220178	58220452	233	21	0	0																		1		600	16	0	217		0	0	0	0	0	0	0	0	0	0	0	0	0	0	0	0	0
chr19	58220194	58220794	58220179	58220269	90	2	5	0.714286		1																		600	15	0	75		0	75	0	0	0	0	0	0	0	0	0	0	0	0	0	0	0
chr19	58220194	58220794	58220180	58220341	161	2	10	0.833333		1																		600	14	0	147		0	147	0	0	0	0	0	0	0	0	0	0	0	0	0	0	0
chr19	58220194	58220794	58220189	58220338	149	12	0	0															1					600	5	0	144		0	0	0	0	0	0	0	0	0	0	0	0	0	0	144	0	0
chr19	58220194	58220794	58220193	58220346	153	11	0	0															1					600	1	0	152		0	0	0	0	0	0	0	0	0	0	0	0	0	0	152	0	0
chr19	58220194	58220794	58220198	58220453	242	20	0	0								1												600	0	0	242		0	0	0	0	0	0	0	242	0	0	0	0	0	0	0	0	0
chr19	58220194	58220794	58220198	58220527	238	21	0	0					1															600	0	0	238		0	0	0	0	238	0	0	0	0	0	0	0	0	0	0	0	0
chr19	58220194	58220794	58220199	58220356	157	11	0	0														1						600	0	0	157		0	0	0	0	0	0	0	0	0	0	0	0	0	157	0	0	0
chr19	58220194	58220794	58220199	58220368	169	12	0	0												1								600	0	0	169		0	0	0	0	0	0	0	0	0	0	0	169	0	0	0	0	0
chr19	58220194	58220794	58220200	58220252	52	1	3	0.75		1																		600	0	0	52		0	52	0	0	0	0	0	0	0	0	0	0	0	0	0	0	0
chr19	58220194	58220794	58220200	58220310	110	8	0	0										1										600	0	0	110		0	0	0	0	0	0	0	0	0	110	0	0	0	0	0	0	0
chr19	58220194	58220794	58220200	58220354	154	11	0	0															1					600	0	0	154		0	0	0	0	0	0	0	0	0	0	0	0	0	0	154	0	0
chr19	58220194	58220794	58220200	58220449	241	21	0	0															1					600	0	0	241		0	0	0	0	0	0	0	0	0	0	0	0	0	0	241	0	0
chr19	58220194	58220794	58220200	58220466	241	20	1	0.047619																		1		600	0	0	241		0	0	0	0	0	0	0	0	0	0	0	0	0	0	0	0	0
chr19	58220194	58220794	58220200	58220495	241	21	0	0							1													600	0	0	241		0	0	0	0	0	0	241	0	0	0	0	0	0	0	0	0	0
chr19	58220194	58220794	58220201	58220405	204	17	0	0																			1	600	0	0	204		0	0	0	0	0	0	0	0	0	0	0	0	0	0	0	0	0
chr19	58220194	58220794	58220203	58220364	161	4	7	0.636364		1																		600	0	0	161		0	161	0	0	0	0	0	0	0	0	0	0	0	0	0	0	0
chr19	58220194	58220794	58220204	58220313	109	8	0	0										1										600	0	0	109		0	0	0	0	0	0	0	0	0	109	0	0	0	0	0	0	0
chr19	58220194	58220794	58220204	58220341	137	0	10	1		1																		600	0	0	137		0	137	0	0	0	0	0	0	0	0	0	0	0	0	0	0	0
chr19	58220194	58220794	58220204	58220342	138	10	0	0			1																	600	0	0	138		0	0	138	0	0	0	0	0	0	0	0	0	0	0	0	0	0
chr19	58220194	58220794	58220204	58220364	160	0	11	1		1																		600	0	0	160		0	160	0	0	0	0	0	0	0	0	0	0	0	0	0	0	0
chr19	58220194	58220794	58220204	58220374	170	3	11	0.785714		1																		600	0	0	170		0	170	0	0	0	0	0	0	0	0	0	0	0	0	0	0	0
chr19	58220194	58220794	58220206	58220327	121	3	6	0.666667		1																		600	0	0	121		0	121	0	0	0	0	0	0	0	0	0	0	0	0	0	0	0
chr19	58220194	58220794	58220207	58220324	117	9	0	0												1								600	0	0	117		0	0	0	0	0	0	0	0	0	0	0	117	0	0	0	0	0
chr19	58220194	58220794	58220207	58220472	239	19	2	0.0952381			1																	600	0	0	239		0	0	239	0	0	0	0	0	0	0	0	0	0	0	0	0	0
chr19	58220194	58220794	58220212	58220268	56	0	4	1		1																		600	0	0	56		0	56	0	0	0	0	0	0	0	0	0	0	0	0	0	0	0
chr19	58220194	58220794	58220212	58220270	58	0	4	1		1																		600	0	0	58		0	58	0	0	0	0	0	0	0	0	0	0	0	0	0	0	0
chr19	58220194	58220794	58220214	58220259	45	0	3	1	1																			600	0	0	45		45	0	0	0	0	0	0	0	0	0	0	0	0	0	0	0	0
chr19	58220194	58220794	58220214	58220335	121	9	0	0																		1		600	0	0	121		0	0	0	0	0	0	0	0	0	0	0	0	0	0	0	0	0
chr19	58220194	58220794	58220214	58220340	126	9	0	0														1						600	0	0	126		0	0	0	0	0	0	0	0	0	0	0	0	0	126	0	0	0
chr19	58220194	58220794	58220214	58220378	164	14	0	0														1						600	0	0	164		0	0	0	0	0	0	0	0	0	0	0	0	0	164	0	0	0
chr19	58220194	58220794	58220215	58220341	126	9	0	0			1																	600	0	0	126		0	0	126	0	0	0	0	0	0	0	0	0	0	0	0	0	0
chr19	58220194	58220794	58220216	58220324	108	8	0	0						1														600	0	0	108		0	0	0	0	0	108	0	0	0	0	0	0	0	0	0	0	0
chr19	58220194	58220794	58220216	58220347	131	9	0	0								1												600	0	0	131		0	0	0	0	0	0	0	131	0	0	0	0	0	0	0	0	0
chr19	58220194	58220794	58220218	58220252	34	0	3	1		1																		600	0	0	34		0	34	0	0	0	0	0	0	0	0	0	0	0	0	0	0	0
chr19	58220194	58220794	58220219	58220457	238	1	19	0.95		1																		600	0	0	238		0	238	0	0	0	0	0	0	0	0	0	0	0	0	0	0	0
chr19	58220194	58220794	58220221	58220269	48	2	2	0.5		1																		600	0	0	48		0	48	0	0	0	0	0	0	0	0	0	0	0	0	0	0	0
chr19	58220194	58220794	58220221	58220375	154	12	1	0.0769231										1										600	0	0	154		0	0	0	0	0	0	0	0	0	154	0	0	0	0	0	0	0
chr19	58220194	58220794	58220222	58220332	110	8	0	0																			1	600	0	0	110		0	0	0	0	0	0	0	0	0	0	0	0	0	0	0	0	0
chr19	58220194	58220794	58220222	58220360	138	9	0	0														1						600	0	0	138		0	0	0	0	0	0	0	0	0	0	0	0	0	138	0	0	0
chr19	58220194	58220794	58220223	58220384	161	12	1	0.0769231																		1		600	0	0	161		0	0	0	0	0	0	0	0	0	0	0	0	0	0	0	0	0
chr19	58220194	58220794	58220224	58220345	121	2	6	0.75		1																		600	0	0	121		0	121	0	0	0	0	0	0	0	0	0	0	0	0	0	0	0
chr19	58220194	58220794	58220224	58220372	148	11	0	0																	1			600	0	0	148		0	0	0	0	0	0	0	0	0	0	0	0	0	0	0	0	148
chr19	58220194	58220794	58220225	58220341	116	8	0	0																		1		600	0	0	116		0	0	0	0	0	0	0	0	0	0	0	0	0	0	0	0	0
chr19	58220194	58220794	58220225	58220374	149	3	9	0.75	1																			600	0	0	149		149	0	0	0	0	0	0	0	0	0	0	0	0	0	0	0	0
chr19	58220194	58220794	58220226	58220268	42	1	1	0.5	1																			600	0	0	42		42	0	0	0	0	0	0	0	0	0	0	0	0	0	0	0	0
chr19	58220194	58220794	58220227	58220270	43	0	3	1		1																		600	0	0	43		0	43	0	0	0	0	0	0	0	0	0	0	0	0	0	0	0
chr19	58220194	58220794	58220227	58220338	111	2	6	0.75	1																			600	0	0	111		111	0	0	0	0	0	0	0	0	0	0	0	0	0	0	0	0
chr19	58220194	58220794	58220228	58220373	145	2	9	0.818182	1																			600	0	0	145		145	0	0	0	0	0	0	0	0	0	0	0	0	0	0	0	0
chr19	58220194	58220794	58220228	58220374	146	11	1	0.0833333												1								600	0	0	146		0	0	0	0	0	0	0	0	0	0	0	146	0	0	0	0	0
chr19	58220194	58220794	58220228	58220411	183	14	0	0							1													600	0	0	183		0	0	0	0	0	0	183	0	0	0	0	0	0	0	0	0	0
chr19	58220194	58220794	58220228	58220503	242	20	0	0												1								600	0	0	242		0	0	0	0	0	0	0	0	0	0	0	242	0	0	0	0	0
chr19	58220194	58220794	58220229	58220252	23	1	1	0.5	1																			600	0	0	23		23	0	0	0	0	0	0	0	0	0	0	0	0	0	0	0	0
chr19	58220194	58220794	58220229	58220268	39	1	2	0.666667	1																			600	0	0	39		39	0	0	0	0	0	0	0	0	0	0	0	0	0	0	0	0
chr19	58220194	58220794	58220229	58220353	124	2	7	0.777778		1																		600	0	0	124		0	124	0	0	0	0	0	0	0	0	0	0	0	0	0	0	0
chr19	58220194	58220794	58220229	58220363	134	2	7	0.777778		1																		600	0	0	134		0	134	0	0	0	0	0	0	0	0	0	0	0	0	0	0	0
chr19	58220194	58220794	58220229	58220374	145	1	11	0.916667		1																		600	0	0	145		0	145	0	0	0	0	0	0	0	0	0	0	0	0	0	0	0
chr19	58220194	58220794	58220229	58220374	145	2	10	0.833333	1																			600	0	0	145		145	0	0	0	0	0	0	0	0	0	0	0	0	0	0	0	0
chr19	58220194	58220794	58220229	58220375	146	2	10	0.833333		1																		600	0	0	146		0	146	0	0	0	0	0	0	0	0	0	0	0	0	0	0	0
chr19	58220194	58220794	58220229	58220375	146	5	7	0.583333	1																			600	0	0	146		146	0	0	0	0	0	0	0	0	0	0	0	0	0	0	0	0
chr19	58220194	58220794	58220229	58220376	147	3	9	0.75		1																		600	0	0	147		0	147	0	0	0	0	0	0	0	0	0	0	0	0	0	0	0
chr19	58220194	58220794	58220229	58220384	155	2	11	0.846154	1																			600	0	0	155		155	0	0	0	0	0	0	0	0	0	0	0	0	0	0	0	0
chr19	58220194	58220794	58220230	58220359	129	8	0	0												1								600	0	0	129		0	0	0	0	0	0	0	0	0	0	0	129	0	0	0	0	0
chr19	58220194	58220794	58220230	58220374	144	4	7	0.636364	1																			600	0	0	144		144	0	0	0	0	0	0	0	0	0	0	0	0	0	0	0	0
chr19	58220194	58220794	58220230	58220376	146	1	10	0.909091		1																		600	0	0	146		0	146	0	0	0	0	0	0	0	0	0	0	0	0	0	0	0
chr19	58220194	58220794	58220230	58220378	148	5	7	0.583333	1																			600	0	0	148		148	0	0	0	0	0	0	0	0	0	0	0	0	0	0	0	0
chr19	58220194	58220794	58220230	58220386	156	0	11	1		1																		600	0	0	156		0	156	0	0	0	0	0	0	0	0	0	0	0	0	0	0	0
chr19	58220194	58220794	58220231	58220378	147	10	0	0							1													600	0	0	147		0	0	0	0	0	0	147	0	0	0	0	0	0	0	0	0	0
chr19	58220194	58220794	58220232	58220364	132	2	6	0.75		1																		600	0	0	132		0	132	0	0	0	0	0	0	0	0	0	0	0	0	0	0	0
chr19	58220194	58220794	58220233	58220368	135	9	0	0														1						600	0	0	135		0	0	0	0	0	0	0	0	0	0	0	0	0	135	0	0	0
chr19	58220194	58220794	58220233	58220383	150	10	2	0.166667				1																600	0	0	150		0	0	0	150	0	0	0	0	0	0	0	0	0	0	0	0	0
chr19	58220194	58220794	58220234	58220341	107	3	4	0.571429		1																		600	0	0	107		0	107	0	0	0	0	0	0	0	0	0	0	0	0	0	0	0
chr19	58220194	58220794	58220234	58220374	140	3	8	0.727273	1																			600	0	0	140		140	0	0	0	0	0	0	0	0	0	0	0	0	0	0	0	0
chr19	58220194	58220794	58220234	58220382	148	12	0	0						1														600	0	0	148		0	0	0	0	0	148	0	0	0	0	0	0	0	0	0	0	0
chr19	58220194	58220794	58220234	58220386	152	3	9	0.75	1																			600	0	0	152		152	0	0	0	0	0	0	0	0	0	0	0	0	0	0	0	0
chr19	58220194	58220794	58220235	58220348	113	5	2	0.285714												1								600	0	0	113		0	0	0	0	0	0	0	0	0	0	0	113	0	0	0	0	0
chr19	58220194	58220794	58220235	58220364	129	8	0	0							1													600	0	0	129		0	0	0	0	0	0	129	0	0	0	0	0	0	0	0	0	0
chr19	58220194	58220794	58220235	58220374	139	9	2	0.181818												1								600	0	0	139		0	0	0	0	0	0	0	0	0	0	0	139	0	0	0	0	0
chr19	58220194	58220794	58220235	58220375	140	11	0	0									1											600	0	0	140		0	0	0	0	0	0	0	0	140	0	0	0	0	0	0	0	0
chr19	58220194	58220794	58220235	58220407	172	14	0	0													1							600	0	0	172		0	0	0	0	0	0	0	0	0	0	0	0	172	0	0	0	0
chr19	58220194	58220794	58220235	58220419	184	14	0	0										1										600	0	0	184		0	0	0	0	0	0	0	0	0	184	0	0	0	0	0	0	0
chr19	58220194	58220794	58220235	58220425	190	15	0	0						1														600	0	0	190		0	0	0	0	0	190	0	0	0	0	0	0	0	0	0	0	0
chr19	58220194	58220794	58220235	58220542	241	21	0	0											1									600	0	0	241		0	0	0	0	0	0	0	0	0	0	241	0	0	0	0	0	0
chr19	58220194	58220794	58220236	58220329	93	6	0	0																	1			600	0	0	93		0	0	0	0	0	0	0	0	0	0	0	0	0	0	0	0	93
chr19	58220194	58220794	58220236	58220350	114	1	7	0.875	1																			600	0	0	114		114	0	0	0	0	0	0	0	0	0	0	0	0	0	0	0	0
chr19	58220194	58220794	58220236	58220364	128	2	6	0.75	1																			600	0	0	128		128	0	0	0	0	0	0	0	0	0	0	0	0	0	0	0	0
chr19	58220194	58220794	58220236	58220375	139	1	10	0.909091		1																		600	0	0	139		0	139	0	0	0	0	0	0	0	0	0	0	0	0	0	0	0
chr19	58220194	58220794	58220236	58220386	150	4	8	0.666667	1																			600	0	0	150		150	0	0	0	0	0	0	0	0	0	0	0	0	0	0	0	0
chr19	58220194	58220794	58220237	58220339	102	1	6	0.857143		1																		600	0	0	102		0	102	0	0	0	0	0	0	0	0	0	0	0	0	0	0	0
chr19	58220194	58220794	58220237	58220384	147	2	10	0.833333		1																		600	0	0	147		0	147	0	0	0	0	0	0	0	0	0	0	0	0	0	0	0
chr19	58220194	58220794	58220238	58220347	109	7	0	0								1												600	0	0	109		0	0	0	0	0	0	0	109	0	0	0	0	0	0	0	0	0
chr19	58220194	58220794	58220242	58220339	97	2	4	0.666667		1																		600	0	0	97		0	97	0	0	0	0	0	0	0	0	0	0	0	0	0	0	0
chr19	58220194	58220794	58220242	58220393	151	11	0	0							1													600	0	0	151		0	0	0	0	0	0	151	0	0	0	0	0	0	0	0	0	0
chr19	58220194	58220794	58220244	58220345	101	2	4	0.666667		1																		600	0	0	101		0	101	0	0	0	0	0	0	0	0	0	0	0	0	0	0	0
chr19	58220194	58220794	58220244	58220364	120	1	6	0.857143	1																			600	0	0	120		120	0	0	0	0	0	0	0	0	0	0	0	0	0	0	0	0
chr19	58220194	58220794	58220245	58220268	23	1	0	0	1																			600	0	0	23		23	0	0	0	0	0	0	0	0	0	0	0	0	0	0	0	0
chr19	58220194	58220794	58220245	58220339	94	1	5	0.833333	1																			600	0	0	94		94	0	0	0	0	0	0	0	0	0	0	0	0	0	0	0	0
chr19	58220194	58220794	58220245	58220380	135	11	0	0													1							600	0	0	135		0	0	0	0	0	0	0	0	0	0	0	0	135	0	0	0	0
chr19	58220194	58220794	58220247	58220365	118	0	8	1		1																		600	0	0	118		0	118	0	0	0	0	0	0	0	0	0	0	0	0	0	0	0
chr19	58220194	58220794	58220247	58220366	119	1	7	0.875		1																		600	0	0	119		0	119	0	0	0	0	0	0	0	0	0	0	0	0	0	0	0
chr19	58220194	58220794	58220250	58220426	176	14	0	0						1														600	0	0	176		0	0	0	0	0	176	0	0	0	0	0	0	0	0	0	0	0
chr19	58220194	58220794	58220250	58220436	186	3	12	0.8		1																		600	0	0	186		0	186	0	0	0	0	0	0	0	0	0	0	0	0	0	0	0
chr19	58220194	58220794	58220251	58220296	45	0	2	1	1																			600	0	0	45		45	0	0	0	0	0	0	0	0	0	0	0	0	0	0	0	0
chr19	58220194	58220794	58220251	58220308	57	1	3	0.75	1																			600	0	0	57		57	0	0	0	0	0	0	0	0	0	0	0	0	0	0	0	0
chr19	58220194	58220794	58220253	58220295	42	1	1	0.5	1																			600	0	0	42		42	0	0	0	0	0	0	0	0	0	0	0	0	0	0	0	0
chr19	58220194	58220794	58220253	58220308	55	1	3	0.75	1																			600	0	0	55		55	0	0	0	0	0	0	0	0	0	0	0	0	0	0	0	0
chr19	58220194	58220794	58220254	58220294	40	0	2	1		1																		600	0	0	40		0	40	0	0	0	0	0	0	0	0	0	0	0	0	0	0	0
chr19	58220194	58220794	58220254	58220414	160	0	13	1		1																		600	0	0	160		0	160	0	0	0	0	0	0	0	0	0	0	0	0	0	0	0
chr19	58220194	58220794	58220255	58220423	168	13	0	0	1																			600	0	0	168		168	0	0	0	0	0	0	0	0	0	0	0	0	0	0	0	0
chr19	58220194	58220794	58220256	58220295	39	1	1	0.5	1																			600	0	0	39		39	0	0	0	0	0	0	0	0	0	0	0	0	0	0	0	0
chr19	58220194	58220794	58220256	58220396	140	3	9	0.75		1																		600	0	0	140		0	140	0	0	0	0	0	0	0	0	0	0	0	0	0	0	0
chr19	58220194	58220794	58220257	58220352	95	7	0	0																		1		600	0	0	95		0	0	0	0	0	0	0	0	0	0	0	0	0	0	0	0	0
chr19	58220194	58220794	58220259	58220407	148	13	0	0			1																	600	0	0	148		0	0	148	0	0	0	0	0	0	0	0	0	0	0	0	0	0
chr19	58220194	58220794	58220260	58220400	140	12	0	0									1											600	0	0	140		0	0	0	0	0	0	0	0	140	0	0	0	0	0	0	0	0
chr19	58220194	58220794	58220261	58220375	114	0	10	1		1																		600	0	0	114		0	114	0	0	0	0	0	0	0	0	0	0	0	0	0	0	0
chr19	58220194	58220794	58220262	58220351	89	0	6	1		1																		600	0	0	89		0	89	0	0	0	0	0	0	0	0	0	0	0	0	0	0	0
chr19	58220194	58220794	58220262	58220374	112	3	6	0.666667		1																		600	0	0	112		0	112	0	0	0	0	0	0	0	0	0	0	0	0	0	0	0
chr19	58220194	58220794	58220262	58220384	122	0	10	1		1																		600	0	0	122		0	122	0	0	0	0	0	0	0	0	0	0	0	0	0	0	0
chr19	58220194	58220794	58220262	58220428	166	2	11	0.846154		1																		600	0	0	166		0	166	0	0	0	0	0	0	0	0	0	0	0	0	0	0	0
chr19	58220194	58220794	58220263	58220339	76	1	4	0.8	1																			600	0	0	76		76	0	0	0	0	0	0	0	0	0	0	0	0	0	0	0	0
chr19	58220194	58220794	58220263	58220363	100	6	0	0	1																			600	0	0	100		100	0	0	0	0	0	0	0	0	0	0	0	0	0	0	0	0
chr19	58220194	58220794	58220263	58220374	111	0	9	1		1																		600	0	0	111		0	111	0	0	0	0	0	0	0	0	0	0	0	0	0	0	0
chr19	58220194	58220794	58220263	58220374	111	2	7	0.777778	1																			600	0	0	111		111	0	0	0	0	0	0	0	0	0	0	0	0	0	0	0	0
chr19	58220194	58220794	58220263	58220384	121	0	10	1		1																		600	0	0	121		0	121	0	0	0	0	0	0	0	0	0	0	0	0	0	0	0
chr19	58220194	58220794	58220263	58220384	121	3	7	0.7	1																			600	0	0	121		121	0	0	0	0	0	0	0	0	0	0	0	0	0	0	0	0
chr19	58220194	58220794	58220265	58220434	169	13	0	0																	1			600	0	0	169		0	0	0	0	0	0	0	0	0	0	0	0	0	0	0	0	169
chr19	58220194	58220794	58220266	58220386	120	10	0	0																		1		600	0	0	120		0	0	0	0	0	0	0	0	0	0	0	0	0	0	0	0	0
chr19	58220194	58220794	58220269	58220375	106	9	0	0														1						600	0	0	106		0	0	0	0	0	0	0	0	0	0	0	0	0	106	0	0	0
chr19	58220194	58220794	58220270	58220374	104	2	7	0.777778	1																			600	0	0	104		104	0	0	0	0	0	0	0	0	0	0	0	0	0	0	0	0
chr19	58220194	58220794	58220271	58220341	70	0	5	1		1																		600	0	0	70		0	70	0	0	0	0	0	0	0	0	0	0	0	0	0	0	0
chr19	58220194	58220794	58220271	58220374	103	1	8	0.888889		1																		600	0	0	103		0	103	0	0	0	0	0	0	0	0	0	0	0	0	0	0	0
chr19	58220194	58220794	58220271	58220378	107	10	0	0						1														600	0	0	107		0	0	0	0	0	107	0	0	0	0	0	0	0	0	0	0	0
chr19	58220194	58220794	58220271	58220384	113	4	6	0.6	1																			600	0	0	113		113	0	0	0	0	0	0	0	0	0	0	0	0	0	0	0	0
chr19	58220194	58220794	58220271	58220586	241	17	3	0.15															1					600	0	0	241		0	0	0	0	0	0	0	0	0	0	0	0	0	0	241	0	0
chr19	58220194	58220794	58220272	58220325	53	1	3	0.75		1																		600	0	0	53		0	53	0	0	0	0	0	0	0	0	0	0	0	0	0	0	0
chr19	58220194	58220794	58220272	58220339	67	0	5	1		1																		600	0	0	67		0	67	0	0	0	0	0	0	0	0	0	0	0	0	0	0	0
chr19	58220194	58220794	58220272	58220345	73	1	4	0.8	1																			600	0	0	73		73	0	0	0	0	0	0	0	0	0	0	0	0	0	0	0	0
chr19	58220194	58220794	58220274	58220339	65	1	4	0.8	1																			600	0	0	65		65	0	0	0	0	0	0	0	0	0	0	0	0	0	0	0	0
chr19	58220194	58220794	58220274	58220351	77	1	5	0.833333		1																		600	0	0	77		0	77	0	0	0	0	0	0	0	0	0	0	0	0	0	0	0
chr19	58220194	58220794	58220274	58220376	102	3	6	0.666667	1																			600	0	0	102		102	0	0	0	0	0	0	0	0	0	0	0	0	0	0	0	0
chr19	58220194	58220794	58220274	58220384	110	2	8	0.8		1																		600	0	0	110		0	110	0	0	0	0	0	0	0	0	0	0	0	0	0	0	0
chr19	58220194	58220794	58220275	58220339	64	2	3	0.6	1																			600	0	0	64		64	0	0	0	0	0	0	0	0	0	0	0	0	0	0	0	0
chr19	58220194	58220794	58220275	58220374	99	1	8	0.888889		1																		600	0	0	99		0	99	0	0	0	0	0	0	0	0	0	0	0	0	0	0	0
chr19	58220194	58220794	58220275	58220374	99	3	6	0.666667	1																			600	0	0	99		99	0	0	0	0	0	0	0	0	0	0	0	0	0	0	0	0
chr19	58220194	58220794	58220275	58220384	109	2	8	0.8		1																		600	0	0	109		0	109	0	0	0	0	0	0	0	0	0	0	0	0	0	0	0
chr19	58220194	58220794	58220275	58220407	132	11	0	0															1					600	0	0	132		0	0	0	0	0	0	0	0	0	0	0	0	0	0	132	0	0
chr19	58220194	58220794	58220275	58220410	135	12	0	0						1														600	0	0	135		0	0	0	0	0	135	0	0	0	0	0	0	0	0	0	0	0
chr19	58220194	58220794	58220275	58220701	242	5	11	0.6875	1																			600	0	0	242		242	0	0	0	0	0	0	0	0	0	0	0	0	0	0	0	0
chr19	58220194	58220794	58220276	58220339	63	1	4	0.8	1	1																		600	0	0	63		63	63	0	0	0	0	0	0	0	0	0	0	0	0	0	0	0
chr19	58220194	58220794	58220276	58220364	88	6	0	0	1																			600	0	0	88		88	0	0	0	0	0	0	0	0	0	0	0	0	0	0	0	0
chr19	58220194	58220794	58220276	58220373	97	2	6	0.75	1																			600	0	0	97		97	0	0	0	0	0	0	0	0	0	0	0	0	0	0	0	0
chr19	58220194	58220794	58220276	58220374	98	1	8	0.888889		1																		600	0	0	98		0	98	0	0	0	0	0	0	0	0	0	0	0	0	0	0	0
chr19	58220194	58220794	58220276	58220374	98	4	5	0.555556	1																			600	0	0	98		98	0	0	0	0	0	0	0	0	0	0	0	0	0	0	0	0
chr19	58220194	58220794	58220276	58220376	100	2	7	0.777778		1																		600	0	0	100		0	100	0	0	0	0	0	0	0	0	0	0	0	0	0	0	0
chr19	58220194	58220794	58220276	58220376	100	9	0	0	1																			600	0	0	100		100	0	0	0	0	0	0	0	0	0	0	0	0	0	0	0	0
chr19	58220194	58220794	58220276	58220384	108	1	9	0.9		1																		600	0	0	108		0	108	0	0	0	0	0	0	0	0	0	0	0	0	0	0	0
chr19	58220194	58220794	58220276	58220385	109	1	9	0.9		1																		600	0	0	109		0	109	0	0	0	0	0	0	0	0	0	0	0	0	0	0	0
chr19	58220194	58220794	58220277	58220363	86	0	6	1		1																		600	0	0	86		0	86	0	0	0	0	0	0	0	0	0	0	0	0	0	0	0
chr19	58220194	58220794	58220277	58220387	110	10	0	0									1											600	0	0	110		0	0	0	0	0	0	0	0	110	0	0	0	0	0	0	0	0
chr19	58220194	58220794	58220279	58220308	29	3	0	0	1																			600	0	0	29		29	0	0	0	0	0	0	0	0	0	0	0	0	0	0	0	0
chr19	58220194	58220794	58220283	58220384	101	0	10	1		1																		600	0	0	101		0	101	0	0	0	0	0	0	0	0	0	0	0	0	0	0	0
chr19	58220194	58220794	58220283	58220428	145	4	9	0.692308		1																		600	0	0	145		0	145	0	0	0	0	0	0	0	0	0	0	0	0	0	0	0
chr19	58220194	58220794	58220284	58220451	167	15	0	0																			1	600	0	0	167		0	0	0	0	0	0	0	0	0	0	0	0	0	0	0	0	0
chr19	58220194	58220794	58220288	58220339	51	1	3	0.75	1																			600	0	0	51		51	0	0	0	0	0	0	0	0	0	0	0	0	0	0	0	0
chr19	58220194	58220794	58220288	58220364	76	1	4	0.8	1																			600	0	0	76		76	0	0	0	0	0	0	0	0	0	0	0	0	0	0	0	0
chr19	58220194	58220794	58220290	58220373	83	1	6	0.857143		1																		600	0	0	83		0	83	0	0	0	0	0	0	0	0	0	0	0	0	0	0	0
chr19	58220194	58220794	58220290	58220374	84	1	7	0.875	1																			600	0	0	84		84	0	0	0	0	0	0	0	0	0	0	0	0	0	0	0	0
chr19	58220194	58220794	58220290	58220425	135	12	0	0				1																600	0	0	135		0	0	0	135	0	0	0	0	0	0	0	0	0	0	0	0	0
chr19	58220194	58220794	58220290	58220443	153	13	0	0			1																	600	0	0	153		0	0	153	0	0	0	0	0	0	0	0	0	0	0	0	0	0
chr19	58220194	58220794	58220291	58220452	161	15	0	0																1				600	0	0	161		0	0	0	0	0	0	0	0	0	0	0	0	0	0	0	161	0
chr19	58220194	58220794	58220292	58220423	131	11	0	0			1																	600	0	0	131		0	0	131	0	0	0	0	0	0	0	0	0	0	0	0	0	0
chr19	58220194	58220794	58220292	58220700	242	3	13	0.8125	1																			600	0	0	242		242	0	0	0	0	0	0	0	0	0	0	0	0	0	0	0	0
chr19	58220194	58220794	58220295	58220437	142	10	2	0.166667												1								600	0	0	142		0	0	0	0	0	0	0	0	0	0	0	142	0	0	0	0	0
chr19	58220194	58220794	58220295	58220469	174	12	5	0.294118				1																600	0	0	174		0	0	0	174	0	0	0	0	0	0	0	0	0	0	0	0	0
chr19	58220194	58220794	58220296	58220432	136	11	0	0												1								600	0	0	136		0	0	0	0	0	0	0	0	0	0	0	136	0	0	0	0	0
chr19	58220194	58220794	58220301	58220456	155	12	1	0.0769231				1																600	0	0	155		0	0	0	155	0	0	0	0	0	0	0	0	0	0	0	0	0
chr19	58220194	58220794	58220302	58220374	72	2	4	0.666667	1																			600	0	0	72		72	0	0	0	0	0	0	0	0	0	0	0	0	0	0	0	0
chr19	58220194	58220794	58220302	58220427	125	0	10	1		1																		600	0	0	125		0	125	0	0	0	0	0	0	0	0	0	0	0	0	0	0	0
chr19	58220194	58220794	58220304	58220441	137	11	0	0													1							600	0	0	137		0	0	0	0	0	0	0	0	0	0	0	0	137	0	0	0	0
chr19	58220194	58220794	58220304	58220478	174	12	3	0.2												1								600	0	0	174		0	0	0	0	0	0	0	0	0	0	0	174	0	0	0	0	0
chr19	58220194	58220794	58220307	58220432	125	9	1	0.1									1											600	0	0	125		0	0	0	0	0	0	0	0	125	0	0	0	0	0	0	0	0
chr19	58220194	58220794	58220308	58220451	143	13	0	0														1						600	0	0	143		0	0	0	0	0	0	0	0	0	0	0	0	0	143	0	0	0
chr19	58220194	58220794	58220310	58220442	132	2	9	0.818182	1																			600	0	0	132		132	0	0	0	0	0	0	0	0	0	0	0	0	0	0	0	0
chr19	58220194	58220794	58220319	58220402	83	0	7	1		1																		600	0	0	83		0	83	0	0	0	0	0	0	0	0	0	0	0	0	0	0	0
chr19	58220194	58220794	58220319	58220413	94	3	5	0.625	1																			600	0	0	94		94	0	0	0	0	0	0	0	0	0	0	0	0	0	0	0	0
chr19	58220194	58220794	58220319	58220448	129	10	2	0.166667				1																600	0	0	129		0	0	0	129	0	0	0	0	0	0	0	0	0	0	0	0	0
chr19	58220194	58220794	58220319	58220485	166	16	0	0									1											600	0	0	166		0	0	0	0	0	0	0	0	166	0	0	0	0	0	0	0	0
chr19	58220194	58220794	58220321	58220416	95	0	8	1									1											600	0	0	95		0	0	0	0	0	0	0	0	95	0	0	0	0	0	0	0	0
chr19	58220194	58220794	58220321	58220442	121	10	0	0														1						600	0	0	121		0	0	0	0	0	0	0	0	0	0	0	0	0	121	0	0	0
chr19	58220194	58220794	58220322	58220425	103	9	0	0												1								600	0	0	103		0	0	0	0	0	0	0	0	0	0	0	103	0	0	0	0	0
chr19	58220194	58220794	58220323	58220385	62	3	3	0.5	1																			600	0	0	62		62	0	0	0	0	0	0	0	0	0	0	0	0	0	0	0	0
chr19	58220194	58220794	58220324	58220582	241	21	0	0						1														600	0	0	241		0	0	0	0	0	241	0	0	0	0	0	0	0	0	0	0	0
chr19	58220194	58220794	58220327	58220494	167	16	0	0													1							600	0	0	167		0	0	0	0	0	0	0	0	0	0	0	0	167	0	0	0	0
chr19	58220194	58220794	58220328	58220384	56	1	5	0.833333		1																		600	0	0	56		0	56	0	0	0	0	0	0	0	0	0	0	0	0	0	0	0
chr19	58220194	58220794	58220328	58220436	108	0	9	1		1																		600	0	0	108		0	108	0	0	0	0	0	0	0	0	0	0	0	0	0	0	0
chr19	58220194	58220794	58220328	58220457	129	2	10	0.833333	1																			600	0	0	129		129	0	0	0	0	0	0	0	0	0	0	0	0	0	0	0	0
chr19	58220194	58220794	58220329	58220427	98	1	8	0.888889		1																		600	0	0	98		0	98	0	0	0	0	0	0	0	0	0	0	0	0	0	0	0
chr19	58220194	58220794	58220329	58220491	162	16	0	0			1																	600	0	0	162		0	0	162	0	0	0	0	0	0	0	0	0	0	0	0	0	0
chr19	58220194	58220794	58220329	58220492	163	15	1	0.0625						1														600	0	0	163		0	0	0	0	0	163	0	0	0	0	0	0	0	0	0	0	0
chr19	58220194	58220794	58220329	58220499	170	17	0	0						1														600	0	0	170		0	0	0	0	0	170	0	0	0	0	0	0	0	0	0	0	0
chr19	58220194	58220794	58220330	58220434	104	2	7	0.777778	1																			600	0	0	104		104	0	0	0	0	0	0	0	0	0	0	0	0	0	0	0	0
chr19	58220194	58220794	58220330	58220436	106	2	7	0.777778		1																		600	0	0	106		0	106	0	0	0	0	0	0	0	0	0	0	0	0	0	0	0
chr19	58220194	58220794	58220332	58220487	155	16	0	0																	1			600	0	0	155		0	0	0	0	0	0	0	0	0	0	0	0	0	0	0	0	155
chr19	58220194	58220794	58220334	58220659	241	15	1	0.0625										1										600	0	0	241		0	0	0	0	0	0	0	0	0	241	0	0	0	0	0	0	0
chr19	58220194	58220794	58220336	58220480	144	13	1	0.0714286																1				600	0	0	144		0	0	0	0	0	0	0	0	0	0	0	0	0	0	0	144	0
chr19	58220194	58220794	58220336	58220490	154	15	0	0																	1			600	0	0	154		0	0	0	0	0	0	0	0	0	0	0	0	0	0	0	0	154
chr19	58220194	58220794	58220337	58220480	143	14	0	0															1					600	0	0	143		0	0	0	0	0	0	0	0	0	0	0	0	0	0	143	0	0
chr19	58220194	58220794	58220337	58220508	171	12	5	0.294118						1														600	0	0	171		0	0	0	0	0	171	0	0	0	0	0	0	0	0	0	0	0
chr19	58220194	58220794	58220338	58220538	200	15	5	0.25			1																	600	0	0	200		0	0	200	0	0	0	0	0	0	0	0	0	0	0	0	0	0
chr19	58220194	58220794	58220341	58220488	147	15	0	0												1								600	0	0	147		0	0	0	0	0	0	0	0	0	0	0	147	0	0	0	0	0
chr19	58220194	58220794	58220341	58220590	239	19	1	0.05																		1		600	0	0	239		0	0	0	0	0	0	0	0	0	0	0	0	0	0	0	0	0
chr19	58220194	58220794	58220342	58220411	69	6	1	0.142857					1															600	0	0	69		0	0	0	0	69	0	0	0	0	0	0	0	0	0	0	0	0
chr19	58220194	58220794	58220343	58220436	93	0	8	1		1																		600	0	0	93		0	93	0	0	0	0	0	0	0	0	0	0	0	0	0	0	0
chr19	58220194	58220794	58220343	58220463	120	12	0	0																		1		600	0	0	120		0	0	0	0	0	0	0	0	0	0	0	0	0	0	0	0	0
chr19	58220194	58220794	58220345	58220493	148	15	0	0							1													600	0	0	148		0	0	0	0	0	0	148	0	0	0	0	0	0	0	0	0	0
chr19	58220194	58220794	58220346	58220547	201	20	0	0								1												600	0	0	201		0	0	0	0	0	0	0	201	0	0	0	0	0	0	0	0	0
chr19	58220194	58220794	58220347	58220401	54	2	4	0.666667		1																		600	0	0	54		0	54	0	0	0	0	0	0	0	0	0	0	0	0	0	0	0
chr19	58220194	58220794	58220347	58220436	89	1	7	0.875	1																			600	0	0	89		89	0	0	0	0	0	0	0	0	0	0	0	0	0	0	0	0
chr19	58220194	58220794	58220347	58220549	202	20	0	0							1													600	0	0	202		0	0	0	0	0	0	202	0	0	0	0	0	0	0	0	0	0
chr19	58220194	58220794	58220348	58220490	142	15	0	0													1							600	0	0	142		0	0	0	0	0	0	0	0	0	0	0	0	142	0	0	0	0
chr19	58220194	58220794	58220349	58220536	187	19	0	0									1											600	0	0	187		0	0	0	0	0	0	0	0	187	0	0	0	0	0	0	0	0
chr19	58220194	58220794	58220350	58220455	105	3	8	0.727273	1																			600	0	0	105		105	0	0	0	0	0	0	0	0	0	0	0	0	0	0	0	0
chr19	58220194	58220794	58220351	58220515	164	16	1	0.0588235																			1	600	0	0	164		0	0	0	0	0	0	0	0	0	0	0	0	0	0	0	0	0
chr19	58220194	58220794	58220352	58220454	102	2	8	0.8		1																		600	0	0	102		0	102	0	0	0	0	0	0	0	0	0	0	0	0	0	0	0
chr19	58220194	58220794	58220354	58220489	135	14	0	0																	1			600	0	0	135		0	0	0	0	0	0	0	0	0	0	0	0	0	0	0	0	135
chr19	58220194	58220794	58220356	58220599	241	22	0	0						1														600	0	0	241		0	0	0	0	0	241	0	0	0	0	0	0	0	0	0	0	0
chr19	58220194	58220794	58220357	58220453	96	4	6	0.6	1																			600	0	0	96		96	0	0	0	0	0	0	0	0	0	0	0	0	0	0	0	0
chr19	58220194	58220794	58220357	58220534	177	18	0	0		1																		600	0	0	177		0	177	0	0	0	0	0	0	0	0	0	0	0	0	0	0	0
chr19	58220194	58220794	58220358	58220436	78	2	5	0.714286		1																		600	0	0	78		0	78	0	0	0	0	0	0	0	0	0	0	0	0	0	0	0
chr19	58220194	58220794	58220360	58220429	69	1	6	0.857143		1																		600	0	0	69		0	69	0	0	0	0	0	0	0	0	0	0	0	0	0	0	0
chr19	58220194	58220794	58220361	58220422	61	3	3	0.5	1																			600	0	0	61		61	0	0	0	0	0	0	0	0	0	0	0	0	0	0	0	0
chr19	58220194	58220794	58220361	58220430	69	0	7	1		1																		600	0	0	69		0	69	0	0	0	0	0	0	0	0	0	0	0	0	0	0	0
chr19	58220194	58220794	58220361	58220438	77	2	5	0.714286		1																		600	0	0	77		0	77	0	0	0	0	0	0	0	0	0	0	0	0	0	0	0
chr19	58220194	58220794	58220361	58220461	100	11	0	0		1																		600	0	0	100		0	100	0	0	0	0	0	0	0	0	0	0	0	0	0	0	0
chr19	58220194	58220794	58220361	58220628	242	19	0	0										1										600	0	0	242		0	0	0	0	0	0	0	0	0	242	0	0	0	0	0	0	0
chr19	58220194	58220794	58220362	58220428	66	2	5	0.714286	1																			600	0	0	66		66	0	0	0	0	0	0	0	0	0	0	0	0	0	0	0	0
chr19	58220194	58220794	58220362	58220507	145	10	6	0.375				1																600	0	0	145		0	0	0	145	0	0	0	0	0	0	0	0	0	0	0	0	0
chr19	58220194	58220794	58220362	58220666	241	19	0	0											1									600	0	0	241		0	0	0	0	0	0	0	0	0	0	241	0	0	0	0	0	0
chr19	58220194	58220794	58220362	58220700	242	14	5	0.263158	1																			600	0	0	242		242	0	0	0	0	0	0	0	0	0	0	0	0	0	0	0	0
chr19	58220194	58220794	58220363	58220403	40	0	5	1		1																		600	0	0	40		0	40	0	0	0	0	0	0	0	0	0	0	0	0	0	0	0
chr19	58220194	58220794	58220363	58220569	206	3	17	0.85	1																			600	0	0	206		206	0	0	0	0	0	0	0	0	0	0	0	0	0	0	0	0
chr19	58220194	58220794	58220364	58220456	92	3	7	0.7	1																			600	0	0	92		92	0	0	0	0	0	0	0	0	0	0	0	0	0	0	0	0
chr19	58220194	58220794	58220365	58220547	182	18	0	0				1																600	0	0	182		0	0	0	182	0	0	0	0	0	0	0	0	0	0	0	0	0
chr19	58220194	58220794	58220366	58220479	113	10	1	0.0909091												1								600	0	0	113		0	0	0	0	0	0	0	0	0	0	0	113	0	0	0	0	0
chr19	58220194	58220794	58220368	58220520	152	16	1	0.0588235									1											600	0	0	152		0	0	0	0	0	0	0	0	152	0	0	0	0	0	0	0	0
chr19	58220194	58220794	58220370	58220540	170	18	0	0															1					600	0	0	170		0	0	0	0	0	0	0	0	0	0	0	0	0	0	170	0	0
chr19	58220194	58220794	58220370	58220568	198	11	8	0.421053				1																600	0	0	198		0	0	0	198	0	0	0	0	0	0	0	0	0	0	0	0	0
chr19	58220194	58220794	58220375	58220521	146	11	4	0.266667				1																600	0	0	146		0	0	0	146	0	0	0	0	0	0	0	0	0	0	0	0	0
chr19	58220194	58220794	58220375	58220596	221	18	0	0											1									600	0	0	221		0	0	0	0	0	0	0	0	0	0	221	0	0	0	0	0	0
chr19	58220194	58220794	58220377	58220609	232	2	17	0.894737	1																			600	0	0	232		232	0	0	0	0	0	0	0	0	0	0	0	0	0	0	0	0
chr19	58220194	58220794	58220378	58220706	237	4	12	0.75	1																			600	0	0	237		237	0	0	0	0	0	0	0	0	0	0	0	0	0	0	0	0
chr19	58220194	58220794	58220379	58220692	241	16	0	0																	1			600	0	0	241		0	0	0	0	0	0	0	0	0	0	0	0	0	0	0	0	241
chr19	58220194	58220794	58220379	58220705	241	4	12	0.75		1																		600	0	0	241		0	241	0	0	0	0	0	0	0	0	0	0	0	0	0	0	0
chr19	58220194	58220794	58220380	58220414	34	0	2	1	1																			600	0	0	34		34	0	0	0	0	0	0	0	0	0	0	0	0	0	0	0	0
chr19	58220194	58220794	58220385	58220700	242	5	12	0.705882		1																		600	0	0	242		0	242	0	0	0	0	0	0	0	0	0	0	0	0	0	0	0
chr19	58220194	58220794	58220388	58220525	137	14	0	0															1					600	0	0	137		0	0	0	0	0	0	0	0	0	0	0	0	0	0	137	0	0
chr19	58220194	58220794	58220388	58220703	242	14	3	0.176471																1				600	0	0	242		0	0	0	0	0	0	0	0	0	0	0	0	0	0	0	242	0
chr19	58220194	58220794	58220390	58220536	146	14	1	0.0666667																	1			600	0	0	146		0	0	0	0	0	0	0	0	0	0	0	0	0	0	0	0	146
chr19	58220194	58220794	58220390	58220696	241	2	15	0.882353		1																		600	0	0	241		0	241	0	0	0	0	0	0	0	0	0	0	0	0	0	0	0
chr19	58220194	58220794	58220396	58220575	179	16	0	0			1																	600	0	0	179		0	0	179	0	0	0	0	0	0	0	0	0	0	0	0	0	0
chr19	58220194	58220794	58220398	58220426	28	0	2	1		1																		600	0	0	28		0	28	0	0	0	0	0	0	0	0	0	0	0	0	0	0	0
chr19	58220194	58220794	58220398	58220428	30	0	2	1		1																		600	0	0	30		0	30	0	0	0	0	0	0	0	0	0	0	0	0	0	0	0
chr19	58220194	58220794	58220398	58220429	31	1	1	0.5		1																		600	0	0	31		0	31	0	0	0	0	0	0	0	0	0	0	0	0	0	0	0
chr19	58220194	58220794	58220398	58220456	58	0	5	1		1																		600	0	0	58		0	58	0	0	0	0	0	0	0	0	0	0	0	0	0	0	0
chr19	58220194	58220794	58220398	58220520	122	13	0	0			1																	600	0	0	122		0	0	122	0	0	0	0	0	0	0	0	0	0	0	0	0	0
chr19	58220194	58220794	58220398	58220554	156	4	10	0.714286		1																		600	0	0	156		0	156	0	0	0	0	0	0	0	0	0	0	0	0	0	0	0
chr19	58220194	58220794	58220398	58220651	242	1	17	0.944444	1																			600	0	0	242		242	0	0	0	0	0	0	0	0	0	0	0	0	0	0	0	0
chr19	58220194	58220794	58220398	58220699	241	2	16	0.888889		1																		600	0	0	241		0	241	0	0	0	0	0	0	0	0	0	0	0	0	0	0	0
chr19	58220194	58220794	58220398	58220700	242	4	14	0.777778	1																			600	0	0	242		242	0	0	0	0	0	0	0	0	0	0	0	0	0	0	0	0
chr19	58220194	58220794	58220398	58220700	242	6	12	0.666667		1																		600	0	0	242		0	242	0	0	0	0	0	0	0	0	0	0	0	0	0	0	0
chr19	58220194	58220794	58220398	58220754	242	7	12	0.631579		1																		600	0	0	242		0	242	0	0	0	0	0	0	0	0	0	0	0	0	0	0	0
chr19	58220194	58220794	58220399	58220507	108	11	0	0												1								600	0	0	108		0	0	0	0	0	0	0	0	0	0	0	108	0	0	0	0	0
chr19	58220194	58220794	58220399	58220570	171	15	0	0																1				600	0	0	171		0	0	0	0	0	0	0	0	0	0	0	0	0	0	0	171	0
chr19	58220194	58220794	58220403	58220551	148	14	0	0															1					600	0	0	148		0	0	0	0	0	0	0	0	0	0	0	0	0	0	148	0	0
chr19	58220194	58220794	58220403	58220601	198	17	0	0			1																	600	0	0	198		0	0	198	0	0	0	0	0	0	0	0	0	0	0	0	0	0
chr19	58220194	58220794	58220405	58220576	171	13	2	0.133333				1																600	0	0	171		0	0	0	171	0	0	0	0	0	0	0	0	0	0	0	0	0
chr19	58220194	58220794	58220407	58220607	200	16	0	0																			1	600	0	0	200		0	0	0	0	0	0	0	0	0	0	0	0	0	0	0	0	0
chr19	58220194	58220794	58220408	58220531	123	12	0	0															1					600	0	0	123		0	0	0	0	0	0	0	0	0	0	0	0	0	0	123	0	0
chr19	58220194	58220794	58220409	58220609	200	7	9	0.5625		1																		600	0	0	200		0	200	0	0	0	0	0	0	0	0	0	0	0	0	0	0	0
chr19	58220194	58220794	58220409	58220700	242	4	13	0.764706	1																			600	0	0	242		242	0	0	0	0	0	0	0	0	0	0	0	0	0	0	0	0
chr19	58220194	58220794	58220411	58220536	125	11	1	0.0833333				1																600	0	0	125		0	0	0	125	0	0	0	0	0	0	0	0	0	0	0	0	0
chr19	58220194	58220794	58220411	58220571	160	14	0	0							1													600	0	0	160		0	0	0	0	0	0	160	0	0	0	0	0	0	0	0	0	0
chr19	58220194	58220794	58220411	58220694	239	16	1	0.0588235																		1		600	0	0	239		0	0	0	0	0	0	0	0	0	0	0	0	0	0	0	0	0
chr19	58220194	58220794	58220413	58220519	106	12	0	0											1									600	0	0	106		0	0	0	0	0	0	0	0	0	0	106	0	0	0	0	0	0
chr19	58220194	58220794	58220415	58220868	241	14	2	0.125						1														600	0	74	167		0	0	0	0	0	167	0	0	0	0	0	0	0	0	0	0	0
chr19	58220194	58220794	58220416	58220556	140	13	0	0															1					600	0	0	140		0	0	0	0	0	0	0	0	0	0	0	0	0	0	140	0	0
chr19	58220194	58220794	58220418	58220556	138	13	0	0															1					600	0	0	138		0	0	0	0	0	0	0	0	0	0	0	0	0	0	138	0	0
chr19	58220194	58220794	58220421	58220537	116	13	0	0												1								600	0	0	116		0	0	0	0	0	0	0	0	0	0	0	116	0	0	0	0	0
chr19	58220194	58220794	58220423	58220669	241	15	4	0.210526				1																600	0	0	241		0	0	0	241	0	0	0	0	0	0	0	0	0	0	0	0	0
chr19	58220194	58220794	58220424	58220457	33	0	4	1	1																			600	0	0	33		33	0	0	0	0	0	0	0	0	0	0	0	0	0	0	0	0
chr19	58220194	58220794	58220424	58220459	35	0	3	1		1																		600	0	0	35		0	35	0	0	0	0	0	0	0	0	0	0	0	0	0	0	0
chr19	58220194	58220794	58220424	58220480	56	1	5	0.833333	1																			600	0	0	56		56	0	0	0	0	0	0	0	0	0	0	0	0	0	0	0	0
chr19	58220194	58220794	58220424	58220482	58	2	5	0.714286		1																		600	0	0	58		0	58	0	0	0	0	0	0	0	0	0	0	0	0	0	0	0
chr19	58220194	58220794	58220424	58220488	64	1	7	0.875	1	1																		600	0	0	64		64	64	0	0	0	0	0	0	0	0	0	0	0	0	0	0	0
chr19	58220194	58220794	58220424	58220522	98	2	10	0.833333		1																		600	0	0	98		0	98	0	0	0	0	0	0	0	0	0	0	0	0	0	0	0
chr19	58220194	58220794	58220424	58220558	134	1	12	0.923077		1																		600	0	0	134		0	134	0	0	0	0	0	0	0	0	0	0	0	0	0	0	0
chr19	58220194	58220794	58220424	58220559	135	2	11	0.846154		1																		600	0	0	135		0	135	0	0	0	0	0	0	0	0	0	0	0	0	0	0	0
chr19	58220194	58220794	58220424	58220559	135	13	0	0															1					600	0	0	135		0	0	0	0	0	0	0	0	0	0	0	0	0	0	135	0	0
chr19	58220194	58220794	58220424	58220573	149	1	13	0.928571		1																		600	0	0	149		0	149	0	0	0	0	0	0	0	0	0	0	0	0	0	0	0
chr19	58220194	58220794	58220424	58220581	157	1	14	0.933333	1																			600	0	0	157		157	0	0	0	0	0	0	0	0	0	0	0	0	0	0	0	0
chr19	58220194	58220794	58220424	58220660	236	5	13	0.722222		1																		600	0	0	236		0	236	0	0	0	0	0	0	0	0	0	0	0	0	0	0	0
chr19	58220194	58220794	58220425	58220497	72	0	9	1	1																			600	0	0	72		72	0	0	0	0	0	0	0	0	0	0	0	0	0	0	0	0
chr19	58220194	58220794	58220425	58220510	85	1	9	0.9		1																		600	0	0	85		0	85	0	0	0	0	0	0	0	0	0	0	0	0	0	0	0
chr19	58220194	58220794	58220425	58220548	123	13	0	0										1										600	0	0	123		0	0	0	0	0	0	0	0	0	123	0	0	0	0	0	0	0
chr19	58220194	58220794	58220425	58220655	230	17	0	0																		1		600	0	0	230		0	0	0	0	0	0	0	0	0	0	0	0	0	0	0	0	0
chr19	58220194	58220794	58220425	58220755	241	5	14	0.736842		1																		600	0	0	241		0	241	0	0	0	0	0	0	0	0	0	0	0	0	0	0	0
chr19	58220194	58220794	58220429	58220570	141	13	0	0			1																	600	0	0	141		0	0	141	0	0	0	0	0	0	0	0	0	0	0	0	0	0
chr19	58220194	58220794	58220429	58220699	241	8	9	0.529412		1																		600	0	0	241		0	241	0	0	0	0	0	0	0	0	0	0	0	0	0	0	0
chr19	58220194	58220794	58220430	58220533	103	2	9	0.818182	1																			600	0	0	103		103	0	0	0	0	0	0	0	0	0	0	0	0	0	0	0	0
chr19	58220194	58220794	58220430	58220570	140	13	0	0						1														600	0	0	140		0	0	0	0	0	140	0	0	0	0	0	0	0	0	0	0	0
chr19	58220194	58220794	58220430	58220573	143	14	0	0																1				600	0	0	143		0	0	0	0	0	0	0	0	0	0	0	0	0	0	0	143	0
chr19	58220194	58220794	58220430	58220588	158	14	0	0		1																		600	0	0	158		0	158	0	0	0	0	0	0	0	0	0	0	0	0	0	0	0
chr19	58220194	58220794	58220430	58220693	239	17	0	0		1																		600	0	0	239		0	239	0	0	0	0	0	0	0	0	0	0	0	0	0	0	0
chr19	58220194	58220794	58220431	58220530	99	1	10	0.909091		1																		600	0	0	99		0	99	0	0	0	0	0	0	0	0	0	0	0	0	0	0	0
chr19	58220194	58220794	58220431	58220533	102	5	6	0.545455	1																			600	0	0	102		102	0	0	0	0	0	0	0	0	0	0	0	0	0	0	0	0
chr19	58220194	58220794	58220431	58220536	105	10	0	0	1																			600	0	0	105		105	0	0	0	0	0	0	0	0	0	0	0	0	0	0	0	0
chr19	58220194	58220794	58220431	58220559	128	1	11	0.916667	1																			600	0	0	128		128	0	0	0	0	0	0	0	0	0	0	0	0	0	0	0	0
chr19	58220194	58220794	58220431	58220580	149	14	0	0															1					600	0	0	149		0	0	0	0	0	0	0	0	0	0	0	0	0	0	149	0	0
chr19	58220194	58220794	58220431	58220701	242	2	15	0.882353	1																			600	0	0	242		242	0	0	0	0	0	0	0	0	0	0	0	0	0	0	0	0
chr19	58220194	58220794	58220432	58220580	148	14	0	0														1						600	0	0	148		0	0	0	0	0	0	0	0	0	0	0	0	0	148	0	0	0
chr19	58220194	58220794	58220432	58220623	191	15	0	0													1							600	0	0	191		0	0	0	0	0	0	0	0	0	0	0	0	191	0	0	0	0
chr19	58220194	58220794	58220433	58220571	138	13	0	0																	1			600	0	0	138		0	0	0	0	0	0	0	0	0	0	0	0	0	0	0	0	138
chr19	58220194	58220794	58220434	58220609	175	15	0	0													1							600	0	0	175		0	0	0	0	0	0	0	0	0	0	0	0	175	0	0	0	0
chr19	58220194	58220794	58220436	58220574	138	14	0	0															1					600	0	0	138		0	0	0	0	0	0	0	0	0	0	0	0	0	0	138	0	0
chr19	58220194	58220794	58220438	58220700	241	1	16	0.941176		1																		600	0	0	241		0	241	0	0	0	0	0	0	0	0	0	0	0	0	0	0	0
chr19	58220194	58220794	58220439	58220700	241	2	15	0.882353	1																			600	0	0	241		241	0	0	0	0	0	0	0	0	0	0	0	0	0	0	0	0
chr19	58220194	58220794	58220439	58220701	241	2	15	0.882353		1																		600	0	0	241		0	241	0	0	0	0	0	0	0	0	0	0	0	0	0	0	0
chr19	58220194	58220794	58220441	58220582	141	9	5	0.357143				1																600	0	0	141		0	0	0	141	0	0	0	0	0	0	0	0	0	0	0	0	0
chr19	58220194	58220794	58220441	58220595	154	14	0	0																		1		600	0	0	154		0	0	0	0	0	0	0	0	0	0	0	0	0	0	0	0	0
chr19	58220194	58220794	58220441	58220600	159	15	0	0													1							600	0	0	159		0	0	0	0	0	0	0	0	0	0	0	0	159	0	0	0	0
chr19	58220194	58220794	58220442	58220594	152	13	0	0				1																600	0	0	152		0	0	0	152	0	0	0	0	0	0	0	0	0	0	0	0	0
chr19	58220194	58220794	58220442	58220680	238	17	0	0									1											600	0	0	238		0	0	0	0	0	0	0	0	238	0	0	0	0	0	0	0	0
chr19	58220194	58220794	58220442	58220698	239	3	13	0.8125		1																		600	0	0	239		0	239	0	0	0	0	0	0	0	0	0	0	0	0	0	0	0
chr19	58220194	58220794	58220442	58220818	241	16	0	0			1																	600	0	24	217		0	0	217	0	0	0	0	0	0	0	0	0	0	0	0	0	0
chr19	58220194	58220794	58220443	58220582	139	13	0	0			1																	600	0	0	139		0	0	139	0	0	0	0	0	0	0	0	0	0	0	0	0	0
chr19	58220194	58220794	58220444	58220623	179	14	0	0										1										600	0	0	179		0	0	0	0	0	0	0	0	0	179	0	0	0	0	0	0	0
chr19	58220194	58220794	58220445	58220571	126	10	1	0.0909091							1													600	0	0	126		0	0	0	0	0	0	126	0	0	0	0	0	0	0	0	0	0
chr19	58220194	58220794	58220445	58220592	147	12	0	0													1							600	0	0	147		0	0	0	0	0	0	0	0	0	0	0	0	147	0	0	0	0
chr19	58220194	58220794	58220447	58220584	137	11	0	0				1																600	0	0	137		0	0	0	137	0	0	0	0	0	0	0	0	0	0	0	0	0
chr19	58220194	58220794	58220448	58220604	156	12	0	0									1											600	0	0	156		0	0	0	0	0	0	0	0	156	0	0	0	0	0	0	0	0
chr19	58220194	58220794	58220449	58220570	121	10	0	0															1					600	0	0	121		0	0	0	0	0	0	0	0	0	0	0	0	0	0	121	0	0
chr19	58220194	58220794	58220449	58220747	242	16	0	0								1												600	0	0	242		0	0	0	0	0	0	0	242	0	0	0	0	0	0	0	0	0
chr19	58220194	58220794	58220451	58220598	147	12	0	0								1												600	0	0	147		0	0	0	0	0	0	0	147	0	0	0	0	0	0	0	0	0
chr19	58220194	58220794	58220451	58220629	178	13	0	0																1				600	0	0	178		0	0	0	0	0	0	0	0	0	0	0	0	0	0	0	178	0
chr19	58220194	58220794	58220455	58220790	240	2	14	0.875	1																			600	0	0	240		240	0	0	0	0	0	0	0	0	0	0	0	0	0	0	0	0
chr19	58220194	58220794	58220456	58220569	113	2	8	0.8	1																			600	0	0	113		113	0	0	0	0	0	0	0	0	0	0	0	0	0	0	0	0
chr19	58220194	58220794	58220456	58220602	146	0	12	1									1											600	0	0	146		0	0	0	0	0	0	0	0	146	0	0	0	0	0	0	0	0
chr19	58220194	58220794	58220461	58220599	138	11	0	0					1															600	0	0	138		0	0	0	0	138	0	0	0	0	0	0	0	0	0	0	0	0
chr19	58220194	58220794	58220462	58220721	241	16	0	0																		1		600	0	0	241		0	0	0	0	0	0	0	0	0	0	0	0	0	0	0	0	0
chr19	58220194	58220794	58220464	58220525	61	7	0	0									1											600	0	0	61		0	0	0	0	0	0	0	0	61	0	0	0	0	0	0	0	0
chr19	58220194	58220794	58220465	58220582	117	10	0	0																1				600	0	0	117		0	0	0	0	0	0	0	0	0	0	0	0	0	0	0	117	0
chr19	58220194	58220794	58220467	58220593	126	10	0	0																		1		600	0	0	126		0	0	0	0	0	0	0	0	0	0	0	0	0	0	0	0	0
chr19	58220194	58220794	58220467	58220854	241	13	1	0.0714286			1																	600	0	60	181		0	0	181	0	0	0	0	0	0	0	0	0	0	0	0	0	0
chr19	58220194	58220794	58220468	58220637	169	11	0	0			1																	600	0	0	169		0	0	169	0	0	0	0	0	0	0	0	0	0	0	0	0	0
chr19	58220194	58220794	58220470	58220619	149	10	0	0														1						600	0	0	149		0	0	0	0	0	0	0	0	0	0	0	0	0	149	0	0	0
chr19	58220194	58220794	58220470	58220849	223	13	0	0																			1	600	0	55	168		0	0	0	0	0	0	0	0	0	0	0	0	0	0	0	0	0
chr19	58220194	58220794	58220471	58220621	150	10	0	0					1															600	0	0	150		0	0	0	0	150	0	0	0	0	0	0	0	0	0	0	0	0
chr19	58220194	58220794	58220471	58220633	162	11	0	0					1															600	0	0	162		0	0	0	0	162	0	0	0	0	0	0	0	0	0	0	0	0
chr19	58220194	58220794	58220473	58220641	168	11	0	0																		1		600	0	0	168		0	0	0	0	0	0	0	0	0	0	0	0	0	0	0	0	0
chr19	58220194	58220794	58220473	58220649	176	11	0	0											1									600	0	0	176		0	0	0	0	0	0	0	0	0	0	176	0	0	0	0	0	0
chr19	58220194	58220794	58220476	58220671	195	14	0	0								1												600	0	0	195		0	0	0	0	0	0	0	195	0	0	0	0	0	0	0	0	0
chr19	58220194	58220794	58220477	58220622	145	10	0	0													1							600	0	0	145		0	0	0	0	0	0	0	0	0	0	0	0	145	0	0	0	0
chr19	58220194	58220794	58220477	58220674	197	9	5	0.357143									1											600	0	0	197		0	0	0	0	0	0	0	0	197	0	0	0	0	0	0	0	0
chr19	58220194	58220794	58220481	58220632	151	10	0	0															1					600	0	0	151		0	0	0	0	0	0	0	0	0	0	0	0	0	0	151	0	0
chr19	58220194	58220794	58220482	58220637	155	10	0	0														1						600	0	0	155		0	0	0	0	0	0	0	0	0	0	0	0	0	155	0	0	0
chr19	58220194	58220794	58220483	58220650	167	9	0	0				1																600	0	0	167		0	0	0	167	0	0	0	0	0	0	0	0	0	0	0	0	0
chr19	58220194	58220794	58220485	58220681	196	9	3	0.25				1																600	0	0	196		0	0	0	196	0	0	0	0	0	0	0	0	0	0	0	0	0
chr19	58220194	58220794	58220486	58220638	152	9	0	0			1																	600	0	0	152		0	0	152	0	0	0	0	0	0	0	0	0	0	0	0	0	0
chr19	58220194	58220794	58220487	58220619	132	6	2	0.25												1								600	0	0	132		0	0	0	0	0	0	0	0	0	0	0	132	0	0	0	0	0
chr19	58220194	58220794	58220487	58220670	183	12	0	0						1														600	0	0	183		0	0	0	0	0	183	0	0	0	0	0	0	0	0	0	0	0
chr19	58220194	58220794	58220488	58220656	168	9	0	0									1											600	0	0	168		0	0	0	0	0	0	0	0	168	0	0	0	0	0	0	0	0
chr19	58220194	58220794	58220489	58220698	209	1	11	0.916667	1																			600	0	0	209		209	0	0	0	0	0	0	0	0	0	0	0	0	0	0	0	0
chr19	58220194	58220794	58220490	58220637	147	9	0	0													1							600	0	0	147		0	0	0	0	0	0	0	0	0	0	0	0	147	0	0	0	0
chr19	58220194	58220794	58220490	58220639	149	9	0	0														1						600	0	0	149		0	0	0	0	0	0	0	0	0	0	0	0	0	149	0	0	0
chr19	58220194	58220794	58220490	58220670	180	11	0	0										1										600	0	0	180		0	0	0	0	0	0	0	0	0	180	0	0	0	0	0	0	0
chr19	58220194	58220794	58220490	58220688	198	4	8	0.666667							1													600	0	0	198		0	0	0	0	0	0	198	0	0	0	0	0	0	0	0	0	0
chr19	58220194	58220794	58220491	58220576	85	7	0	0															1					600	0	0	85		0	0	0	0	0	0	0	0	0	0	0	0	0	0	85	0	0
chr19	58220194	58220794	58220492	58220639	147	9	0	0												1								600	0	0	147		0	0	0	0	0	0	0	0	0	0	0	147	0	0	0	0	0
chr19	58220194	58220794	58220492	58220647	155	8	1	0.111111						1														600	0	0	155		0	0	0	0	0	155	0	0	0	0	0	0	0	0	0	0	0
chr19	58220194	58220794	58220493	58220558	65	0	5	1	1																			600	0	0	65		65	0	0	0	0	0	0	0	0	0	0	0	0	0	0	0	0
chr19	58220194	58220794	58220493	58220582	89	6	1	0.142857				1																600	0	0	89		0	0	0	89	0	0	0	0	0	0	0	0	0	0	0	0	0
chr19	58220194	58220794	58220493	58220651	158	9	0	0																	1			600	0	0	158		0	0	0	0	0	0	0	0	0	0	0	0	0	0	0	0	158
chr19	58220194	58220794	58220495	58220623	128	8	0	0																	1			600	0	0	128		0	0	0	0	0	0	0	0	0	0	0	0	0	0	0	0	128
chr19	58220194	58220794	58220497	58220624	127	7	0	0															1					600	0	0	127		0	0	0	0	0	0	0	0	0	0	0	0	0	0	127	0	0
chr19	58220194	58220794	58220498	58220723	225	13	0	0																		1		600	0	0	225		0	0	0	0	0	0	0	0	0	0	0	0	0	0	0	0	0
chr19	58220194	58220794	58220500	58220637	137	8	0	0									1											600	0	0	137		0	0	0	0	0	0	0	0	137	0	0	0	0	0	0	0	0
chr19	58220194	58220794	58220500	58220656	156	8	0	0														1						600	0	0	156		0	0	0	0	0	0	0	0	0	0	0	0	0	156	0	0	0
chr19	58220194	58220794	58220501	58220624	123	7	0	0						1														600	0	0	123		0	0	0	0	0	123	0	0	0	0	0	0	0	0	0	0	0
chr19	58220194	58220794	58220501	58220638	137	6	2	0.25												1								600	0	0	137		0	0	0	0	0	0	0	0	0	0	0	137	0	0	0	0	0
chr19	58220194	58220794	58220501	58220641	140	8	0	0							1													600	0	0	140		0	0	0	0	0	0	140	0	0	0	0	0	0	0	0	0	0
chr19	58220194	58220794	58220502	58220583	81	1	4	0.8		1																		600	0	0	81		0	81	0	0	0	0	0	0	0	0	0	0	0	0	0	0	0
chr19	58220194	58220794	58220502	58220588	86	2	3	0.6		1																		600	0	0	86		0	86	0	0	0	0	0	0	0	0	0	0	0	0	0	0	0
chr19	58220194	58220794	58220502	58220632	130	7	0	0														1						600	0	0	130		0	0	0	0	0	0	0	0	0	0	0	0	0	130	0	0	0
chr19	58220194	58220794	58220502	58220869	241	5	6	0.545455		1																		600	0	75	166		0	166	0	0	0	0	0	0	0	0	0	0	0	0	0	0	0
chr19	58220194	58220794	58220505	58220672	167	10	0	0																			1	600	0	0	167		0	0	0	0	0	0	0	0	0	0	0	0	0	0	0	0	0
chr19	58220194	58220794	58220506	58220625	119	5	1	0.166667														1						600	0	0	119		0	0	0	0	0	0	0	0	0	0	0	0	0	119	0	0	0
chr19	58220194	58220794	58220506	58220634	128	1	6	0.857143															1					600	0	0	128		0	0	0	0	0	0	0	0	0	0	0	0	0	0	128	0	0
chr19	58220194	58220794	58220508	58220623	115	5	1	0.166667								1												600	0	0	115		0	0	0	0	0	0	0	115	0	0	0	0	0	0	0	0	0
chr19	58220194	58220794	58220508	58220655	147	5	2	0.285714				1																600	0	0	147		0	0	0	147	0	0	0	0	0	0	0	0	0	0	0	0	0
chr19	58220194	58220794	58220510	58220560	50	0	3	1	1																			600	0	0	50		50	0	0	0	0	0	0	0	0	0	0	0	0	0	0	0	0
chr19	58220194	58220794	58220513	58220673	160	4	6	0.6				1																600	0	0	160		0	0	0	160	0	0	0	0	0	0	0	0	0	0	0	0	0
chr19	58220194	58220794	58220514	58220609	95	1	4	0.8		1																		600	0	0	95		0	95	0	0	0	0	0	0	0	0	0	0	0	0	0	0	0
chr19	58220194	58220794	58220514	58220650	136	7	0	0														1						600	0	0	136		0	0	0	0	0	0	0	0	0	0	0	0	0	136	0	0	0
chr19	58220194	58220794	58220514	58220699	185	0	9	1		1																		600	0	0	185		0	185	0	0	0	0	0	0	0	0	0	0	0	0	0	0	0
chr19	58220194	58220794	58220515	58220620	238	19	0	0							1													600	0	0	238		0	0	0	0	0	0	238	0	0	0	0	0	0	0	0	0	0
chr19	58220194	58220794	58220515	58220662	147	6	1	0.142857							1													600	0	0	147		0	0	0	0	0	0	147	0	0	0	0	0	0	0	0	0	0
chr19	58220194	58220794	58220516	58220657	141	6	0	0									1											600	0	0	141		0	0	0	0	0	0	0	0	141	0	0	0	0	0	0	0	0
chr19	58220194	58220794	58220516	58220675	159	9	0	0																			1	600	0	0	159		0	0	0	0	0	0	0	0	0	0	0	0	0	0	0	0	0
chr19	58220194	58220794	58220516	58220686	170	8	1	0.111111				1																600	0	0	170		0	0	0	170	0	0	0	0	0	0	0	0	0	0	0	0	0
chr19	58220194	58220794	58220516	58220714	198	10	0	0						1														600	0	0	198		0	0	0	0	0	198	0	0	0	0	0	0	0	0	0	0	0
chr19	58220194	58220794	58220517	58220639	122	6	0	0														1						600	0	0	122		0	0	0	0	0	0	0	0	0	0	0	0	0	122	0	0	0
chr19	58220194	58220794	58220517	58220671	154	9	0	0			1																	600	0	0	154		0	0	154	0	0	0	0	0	0	0	0	0	0	0	0	0	0
chr19	58220194	58220794	58220517	58220672	155	9	0	0			1																	600	0	0	155		0	0	155	0	0	0	0	0	0	0	0	0	0	0	0	0	0
chr19	58220194	58220794	58220517	58220674	157	9	0	0																1				600	0	0	157		0	0	0	0	0	0	0	0	0	0	0	0	0	0	0	157	0
chr19	58220194	58220794	58220517	58220679	162	9	0	0								1												600	0	0	162		0	0	0	0	0	0	0	162	0	0	0	0	0	0	0	0	0
chr19	58220194	58220794	58220517	58220684	167	7	1	0.125									1											600	0	0	167		0	0	0	0	0	0	0	0	167	0	0	0	0	0	0	0	0
chr19	58220194	58220794	58220518	58220854	241	8	2	0.2		1																		600	0	60	181		0	181	0	0	0	0	0	0	0	0	0	0	0	0	0	0	0
chr19	58220194	58220794	58220520	58220679	159	8	0	0													1							600	0	0	159		0	0	0	0	0	0	0	0	0	0	0	0	159	0	0	0	0
chr19	58220194	58220794	58220521	58220661	140	6	0	0																1				600	0	0	140		0	0	0	0	0	0	0	0	0	0	0	0	0	0	0	140	0
chr19	58220194	58220794	58220522	58220647	125	5	0	0													1							600	0	0	125		0	0	0	0	0	0	0	0	0	0	0	0	125	0	0	0	0
chr19	58220194	58220794	58220522	58220656	134	5	0	0												1								600	0	0	134		0	0	0	0	0	0	0	0	0	0	0	134	0	0	0	0	0
chr19	58220194	58220794	58220522	58220658	136	6	0	0																1				600	0	0	136		0	0	0	0	0	0	0	0	0	0	0	0	0	0	0	136	0
chr19	58220194	58220794	58220522	58220667	145	1	6	0.857143															1					600	0	0	145		0	0	0	0	0	0	0	0	0	0	0	0	0	0	145	0	0
chr19	58220194	58220794	58220522	58220756	234	11	0	0										1										600	0	0	234		0	0	0	0	0	0	0	0	0	234	0	0	0	0	0	0	0
chr19	58220194	58220794	58220522	58220836	241	9	1	0.1											1									600	0	42	199		0	0	0	0	0	0	0	0	0	0	199	0	0	0	0	0	0
chr19	58220194	58220794	58220523	58220651	128	5	0	0			1																	600	0	0	128		0	0	128	0	0	0	0	0	0	0	0	0	0	0	0	0	0
chr19	58220194	58220794	58220523	58220669	146	5	2	0.285714											1									600	0	0	146		0	0	0	0	0	0	0	0	0	0	146	0	0	0	0	0	0
chr19	58220194	58220794	58220523	58220682	159	7	1	0.125																			1	600	0	0	159		0	0	0	0	0	0	0	0	0	0	0	0	0	0	0	0	0
chr19	58220194	58220794	58220523	58220686	163	7	1	0.125										1										600	0	0	163		0	0	0	0	0	0	0	0	0	163	0	0	0	0	0	0	0
chr19	58220194	58220794	58220523	58220693	170	8	0	0									1											600	0	0	170		0	0	0	0	0	0	0	0	170	0	0	0	0	0	0	0	0
chr19	58220194	58220794	58220523	58220716	193	9	0	0																		1		600	0	0	193		0	0	0	0	0	0	0	0	0	0	0	0	0	0	0	0	0
chr19	58220194	58220794	58220524	58220670	146	7	0	0															1					600	0	0	146		0	0	0	0	0	0	0	0	0	0	0	0	0	0	146	0	0
chr19	58220194	58220794	58220524	58220675	151	8	0	0																		1		600	0	0	151		0	0	0	0	0	0	0	0	0	0	0	0	0	0	0	0	0
chr19	58220194	58220794	58220524	58220687	163	8	0	0																1				600	0	0	163		0	0	0	0	0	0	0	0	0	0	0	0	0	0	0	163	0
chr19	58220194	58220794	58220525	58220685	160	8	0	0			1																	600	0	0	160		0	0	160	0	0	0	0	0	0	0	0	0	0	0	0	0	0
chr19	58220194	58220794	58220526	58220681	155	8	0	0																		1		600	0	0	155		0	0	0	0	0	0	0	0	0	0	0	0	0	0	0	0	0
chr19	58220194	58220794	58220527	58220686	159	3	5	0.625	1																			600	0	0	159		159	0	0	0	0	0	0	0	0	0	0	0	0	0	0	0	0
chr19	58220194	58220794	58220528	58220670	142	7	0	0								1												600	0	0	142		0	0	0	0	0	0	0	142	0	0	0	0	0	0	0	0	0
chr19	58220194	58220794	58220528	58220670	142	8	0	0																1				600	0	0	142		0	0	0	0	0	0	0	0	0	0	0	0	0	0	0	142	0
chr19	58220194	58220794	58220528	58220693	165	2	6	0.75		1																		600	0	0	165		0	165	0	0	0	0	0	0	0	0	0	0	0	0	0	0	0
chr19	58220194	58220794	58220528	58220698	170	2	6	0.75		1																		600	0	0	170		0	170	0	0	0	0	0	0	0	0	0	0	0	0	0	0	0
chr19	58220194	58220794	58220528	58220700	172	0	8	1		1																		600	0	0	172		0	172	0	0	0	0	0	0	0	0	0	0	0	0	0	0	0
chr19	58220194	58220794	58220528	58220763	235	5	6	0.545455		1																		600	0	0	235		0	235	0	0	0	0	0	0	0	0	0	0	0	0	0	0	0
chr19	58220194	58220794	58220530	58220666	136	7	0	0					1							1								600	0	0	136		0	0	0	0	136	0	0	0	0	0	0	136	0	0	0	0	0
chr19	58220194	58220794	58220530	58220669	139	7	0	0											1									600	0	0	139		0	0	0	0	0	0	0	0	0	0	139	0	0	0	0	0	0
chr19	58220194	58220794	58220530	58220700	170	8	0	0								1												600	0	0	170		0	0	0	0	0	0	0	170	0	0	0	0	0	0	0	0	0
chr19	58220194	58220794	58220531	58220678	147	8	0	0												1								600	0	0	147		0	0	0	0	0	0	0	0	0	0	0	147	0	0	0	0	0
chr19	58220194	58220794	58220534	58220652	118	4	1	0.2																1				600	0	0	118		0	0	0	0	0	0	0	0	0	0	0	0	0	0	0	118	0
chr19	58220194	58220794	58220534	58220669	135	7	0	0											1									600	0	0	135		0	0	0	0	0	0	0	0	0	0	135	0	0	0	0	0	0
chr19	58220194	58220794	58220535	58220708	173	9	0	0					1															600	0	0	173		0	0	0	0	173	0	0	0	0	0	0	0	0	0	0	0	0
chr19	58220194	58220794	58220536	58220672	136	8	0	0															1					600	0	0	136		0	0	0	0	0	0	0	0	0	0	0	0	0	0	136	0	0
chr19	58220194	58220794	58220537	58220673	136	7	0	0												1								600	0	0	136		0	0	0	0	0	0	0	0	0	0	0	136	0	0	0	0	0
chr19	58220194	58220794	58220540	58220693	153	7	0	0												1								600	0	0	153		0	0	0	0	0	0	0	0	0	0	0	153	0	0	0	0	0
chr19	58220194	58220794	58220541	58220680	139	7	0	0													1							600	0	0	139		0	0	0	0	0	0	0	0	0	0	0	0	139	0	0	0	0
chr19	58220194	58220794	58220544	58220588	44	0	2	1		1																		600	0	0	44		0	44	0	0	0	0	0	0	0	0	0	0	0	0	0	0	0
chr19	58220194	58220794	58220544	58220589	45	0	2	1	1																			600	0	0	45		45	0	0	0	0	0	0	0	0	0	0	0	0	0	0	0	0
chr19	58220194	58220794	58220544	58220637	93	1	3	0.75		1																		600	0	0	93		0	93	0	0	0	0	0	0	0	0	0	0	0	0	0	0	0
chr19	58220194	58220794	58220544	58220659	115	3	2	0.4		1																		600	0	0	115		0	115	0	0	0	0	0	0	0	0	0	0	0	0	0	0	0
chr19	58220194	58220794	58220544	58220667	123	1	5	0.833333		1																		600	0	0	123		0	123	0	0	0	0	0	0	0	0	0	0	0	0	0	0	0
chr19	58220194	58220794	58220544	58220674	130	7	0	0			1																	600	0	0	130		0	0	130	0	0	0	0	0	0	0	0	0	0	0	0	0	0
chr19	58220194	58220794	58220544	58220687	143	7	0	0													1							600	0	0	143		0	0	0	0	0	0	0	0	0	0	0	0	143	0	0	0	0
chr19	58220194	58220794	58220544	58220693	149	4	0	0																		1		600	0	0	149		0	0	0	0	0	0	0	0	0	0	0	0	0	0	0	0	0
chr19	58220194	58220794	58220544	58220721	177	0	9	1		1																		600	0	0	177		0	177	0	0	0	0	0	0	0	0	0	0	0	0	0	0	0
chr19	58220194	58220794	58220544	58220811	242	5	6	0.545455		1																		600	0	17	225		0	225	0	0	0	0	0	0	0	0	0	0	0	0	0	0	0
chr19	58220194	58220794	58220545	58220589	44	0	2	1	1																			600	0	0	44		44	0	0	0	0	0	0	0	0	0	0	0	0	0	0	0	0
chr19	58220194	58220794	58220545	58220700	155	2	5	0.714286		1																		600	0	0	155		0	155	0	0	0	0	0	0	0	0	0	0	0	0	0	0	0
chr19	58220194	58220794	58220545	58220710	165	8	0	0																1				600	0	0	165		0	0	0	0	0	0	0	0	0	0	0	0	0	0	0	165	0
chr19	58220194	58220794	58220546	58220588	42	1	1	0.5		1																		600	0	0	42		0	42	0	0	0	0	0	0	0	0	0	0	0	0	0	0	0
chr19	58220194	58220794	58220546	58220608	62	0	3	1		1																		600	0	0	62		0	62	0	0	0	0	0	0	0	0	0	0	0	0	0	0	0
chr19	58220194	58220794	58220546	58220632	86	1	3	0.75		1																		600	0	0	86		0	86	0	0	0	0	0	0	0	0	0	0	0	0	0	0	0
chr19	58220194	58220794	58220546	58220667	86	0	6	1		1																		600	0	0	86		0	86	0	0	0	0	0	0	0	0	0	0	0	0	0	0	0
chr19	58220194	58220794	58220546	58220674	128	7	0	0					1															600	0	0	128		0	0	0	0	128	0	0	0	0	0	0	0	0	0	0	0	0
chr19	58220194	58220794	58220546	58220683	137	7	0	0																		1		600	0	0	137		0	0	0	0	0	0	0	0	0	0	0	0	0	0	0	0	0
chr19	58220194	58220794	58220546	58220706	160	1	6	0.857143	1																			600	0	0	160		160	0	0	0	0	0	0	0	0	0	0	0	0	0	0	0	0
chr19	58220194	58220794	58220547	58220729	182	9	0	0																1				600	0	0	182		0	0	0	0	0	0	0	0	0	0	0	0	0	0	0	182	0
chr19	58220194	58220794	58220548	58220650	102	4	0	0														1						600	0	0	102		0	0	0	0	0	0	0	0	0	0	0	0	0	102	0	0	0
chr19	58220194	58220794	58220548	58220692	144	7	0	0							1													600	0	0	144		0	0	0	0	0	0	144	0	0	0	0	0	0	0	0	0	0
chr19	58220194	58220794	58220548	58220700	152	2	5	0.714286	1																			600	0	0	152		152	0	0	0	0	0	0	0	0	0	0	0	0	0	0	0	0
chr19	58220194	58220794	58220549	58220699	150	0	7	1		1																		600	0	0	150		0	150	0	0	0	0	0	0	0	0	0	0	0	0	0	0	0
chr19	58220194	58220794	58220549	58220699	150	2	5	0.714286		1																		600	0	0	150		0	150	0	0	0	0	0	0	0	0	0	0	0	0	0	0	0
chr19	58220194	58220794	58220549	58220704	155	4	3	0.428571				1																600	0	0	155		0	0	0	155	0	0	0	0	0	0	0	0	0	0	0	0	0
chr19	58220194	58220794	58220551	58220662	111	5	0	0																1				600	0	0	111		0	0	0	0	0	0	0	0	0	0	0	0	0	0	0	111	0
chr19	58220194	58220794	58220551	58220695	144	6	0	0																			1	600	0	0	144		0	0	0	0	0	0	0	0	0	0	0	0	0	0	0	0	0
chr19	58220194	58220794	58220551	58220705	154	7	0	0													1							600	0	0	154		0	0	0	0	0	0	0	0	0	0	0	0	154	0	0	0	0
chr19	58220194	58220794	58220551	58220712	161	8	0	0											1									600	0	0	161		0	0	0	0	0	0	0	0	0	0	161	0	0	0	0	0	0
chr19	58220194	58220794	58220551	58220734	183	9	0	0			1																	600	0	0	183		0	0	183	0	0	0	0	0	0	0	0	0	0	0	0	0	0
chr19	58220194	58220794	58220551	58220885	241	11	0	0													1							600	0	91	150		0	0	0	0	0	0	0	0	0	0	0	0	150	0	0	0	0
chr19	58220194	58220794	58220552	58220665	113	5	1	0.166667										1										600	0	0	113		0	0	0	0	0	0	0	0	0	113	0	0	0	0	0	0	0
chr19	58220194	58220794	58220552	58220684	132	6	1	0.142857						1														600	0	0	132		0	0	0	0	0	132	0	0	0	0	0	0	0	0	0	0	0
chr19	58220194	58220794	58220553	58220687	134	5	2	0.285714				1																600	0	0	134		0	0	0	134	0	0	0	0	0	0	0	0	0	0	0	0	0
chr19	58220194	58220794	58220554	58220715	161	8	0	0								1												600	0	0	161		0	0	0	0	0	0	0	161	0	0	0	0	0	0	0	0	0
chr19	58220194	58220794	58220555	58220692	137	7	0	0								1												600	0	0	137		0	0	0	0	0	0	0	137	0	0	0	0	0	0	0	0	0
chr19	58220194	58220794	58220556	58220590	34	0	2	1	1																			600	0	0	34		34	0	0	0	0	0	0	0	0	0	0	0	0	0	0	0	0
chr19	58220194	58220794	58220556	58220632	76	2	2	0.5	1	1																		600	0	0	76		76	76	0	0	0	0	0	0	0	0	0	0	0	0	0	0	0
chr19	58220194	58220794	58220556	58220637	81	2	2	0.5		1																		600	0	0	81		0	81	0	0	0	0	0	0	0	0	0	0	0	0	0	0	0
chr19	58220194	58220794	58220556	58220647	91	1	3	0.75	1																			600	0	0	91		91	0	0	0	0	0	0	0	0	0	0	0	0	0	0	0	0
chr19	58220194	58220794	58220556	58220670	114	7	0	0																	1			600	0	0	114		0	0	0	0	0	0	0	0	0	0	0	0	0	0	0	0	114
chr19	58220194	58220794	58220556	58220676	120	4	3	0.428571	1																			600	0	0	120		120	0	0	0	0	0	0	0	0	0	0	0	0	0	0	0	0
chr19	58220194	58220794	58220556	58220694	138	7	0	0									1											600	0	0	138		0	0	0	0	0	0	0	0	138	0	0	0	0	0	0	0	0
chr19	58220194	58220794	58220556	58220706	150	7	0	0			1																	600	0	0	150		0	0	150	0	0	0	0	0	0	0	0	0	0	0	0	0	0
chr19	58220194	58220794	58220556	58220729	173	9	0	0			1																	600	0	0	173		0	0	173	0	0	0	0	0	0	0	0	0	0	0	0	0	0
chr19	58220194	58220794	58220556	58220730	174	9	0	0				1																600	0	0	174		0	0	0	174	0	0	0	0	0	0	0	0	0	0	0	0	0
chr19	58220194	58220794	58220557	58220645	88	1	3	0.75		1																		600	0	0	88		0	88	0	0	0	0	0	0	0	0	0	0	0	0	0	0	0
chr19	58220194	58220794	58220557	58220659	102	2	3	0.6	1																			600	0	0	102		102	0	0	0	0	0	0	0	0	0	0	0	0	0	0	0	0
chr19	58220194	58220794	58220558	58220699	141	6	1	0.142857																	1			600	0	0	141		0	0	0	0	0	0	0	0	0	0	0	0	0	0	0	0	141
chr19	58220194	58220794	58220558	58220720	162	9	0	0								1												600	0	0	162		0	0	0	0	0	0	0	162	0	0	0	0	0	0	0	0	0
chr19	58220194	58220794	58220558	58220869	242	4	8	0.666667		1																		600	0	75	167		0	167	0	0	0	0	0	0	0	0	0	0	0	0	0	0	0
chr19	58220194	58220794	58220559	58220686	127	1	6	0.857143															1					600	0	0	127		0	0	0	0	0	0	0	0	0	0	0	0	0	0	127	0	0
chr19	58220194	58220794	58220560	58220698	138	7	0	0						1														600	0	0	138		0	0	0	0	0	138	0	0	0	0	0	0	0	0	0	0	0
chr19	58220194	58220794	58220562	58220701	139	7	0	0							1													600	0	0	139		0	0	0	0	0	0	139	0	0	0	0	0	0	0	0	0	0
chr19	58220194	58220794	58220562	58220715	153	7	1	0.125							1													600	0	0	153		0	0	0	0	0	0	153	0	0	0	0	0	0	0	0	0	0
chr19	58220194	58220794	58220562	58220721	159	7	2	0.222222				1																600	0	0	159		0	0	0	159	0	0	0	0	0	0	0	0	0	0	0	0	0
chr19	58220194	58220794	58220563	58220681	118	7	0	0															1					600	0	0	118		0	0	0	0	0	0	0	0	0	0	0	0	0	0	118	0	0
chr19	58220194	58220794	58220563	58220702	139	7	0	0																1				600	0	0	139		0	0	0	0	0	0	0	0	0	0	0	0	0	0	0	139	0
chr19	58220194	58220794	58220563	58220713	150	8	0	0																	1			600	0	0	150		0	0	0	0	0	0	0	0	0	0	0	0	0	0	0	0	150
chr19	58220194	58220794	58220563	58220726	163	8	0	0										1										600	0	0	163		0	0	0	0	0	0	0	0	0	163	0	0	0	0	0	0	0
chr19	58220194	58220794	58220564	58220711	147	8	0	0								1												600	0	0	147		0	0	0	0	0	0	0	147	0	0	0	0	0	0	0	0	0
chr19	58220194	58220794	58220564	58220714	150	8	0	0																	1			600	0	0	150		0	0	0	0	0	0	0	0	0	0	0	0	0	0	0	0	150
chr19	58220194	58220794	58220564	58220715	151	8	0	0												1								600	0	0	151		0	0	0	0	0	0	0	0	0	0	0	151	0	0	0	0	0
chr19	58220194	58220794	58220564	58220733	169	9	0	0																			1	600	0	0	169		0	0	0	0	0	0	0	0	0	0	0	0	0	0	0	0	0
chr19	58220194	58220794	58220564	58220739	175	9	0	0										1										600	0	0	175		0	0	0	0	0	0	0	0	0	175	0	0	0	0	0	0	0
chr19	58220194	58220794	58220565	58220713	148	8	0	0															1					600	0	0	148		0	0	0	0	0	0	0	0	0	0	0	0	0	0	148	0	0
chr19	58220194	58220794	58220566	58220727	161	9	0	0									1											600	0	0	161		0	0	0	0	0	0	0	0	161	0	0	0	0	0	0	0	0
chr19	58220194	58220794	58220566	58220743	177	8	0	0			1																	600	0	0	177		0	0	177	0	0	0	0	0	0	0	0	0	0	0	0	0	0
chr19	58220194	58220794	58220567	58220738	171	9	0	0													1							600	0	0	171		0	0	0	0	0	0	0	0	0	0	0	0	171	0	0	0	0
chr19	58220194	58220794	58220568	58220744	176	9	0	0									1											600	0	0	176		0	0	0	0	0	0	0	0	176	0	0	0	0	0	0	0	0
chr19	58220194	58220794	58220569	58220721	152	8	0	0									1											600	0	0	152		0	0	0	0	0	0	0	0	152	0	0	0	0	0	0	0	0
chr19	58220194	58220794	58220569	58220730	161	8	0	0																		1		600	0	0	161		0	0	0	0	0	0	0	0	0	0	0	0	0	0	0	0	0
chr19	58220194	58220794	58220570	58220689	118	4	1	0.2																1				600	0	0	118		0	0	0	0	0	0	0	0	0	0	0	0	0	0	0	118	0
chr19	58220194	58220794	58220570	58220735	165	8	0	0										1										600	0	0	165		0	0	0	0	0	0	0	0	0	165	0	0	0	0	0	0	0
chr19	58220194	58220794	58220571	58220706	135	6	0	0																1				600	0	0	135		0	0	0	0	0	0	0	0	0	0	0	0	0	0	0	135	0
chr19	58220194	58220794	58220571	58220714	143	5	2	0.285714											1									600	0	0	143		0	0	0	0	0	0	0	0	0	0	143	0	0	0	0	0	0
chr19	58220194	58220794	58220571	58220750	179	8	0	0						1														600	0	0	179		0	0	0	0	0	179	0	0	0	0	0	0	0	0	0	0	0
chr19	58220194	58220794	58220571	58220812	241	11	0	0										1										600	0	18	223		0	0	0	0	0	0	0	0	0	223	0	0	0	0	0	0	0
chr19	58220194	58220794	58220572	58220686	114	6	0	0													1							600	0	0	114		0	0	0	0	0	0	0	0	0	0	0	0	114	0	0	0	0
chr19	58220194	58220794	58220572	58220725	153	8	0	0			1																	600	0	0	153		0	0	153	0	0	0	0	0	0	0	0	0	0	0	0	0	0
chr19	58220194	58220794	58220572	58220730	158	7	1	0.125											1									600	0	0	158		0	0	0	0	0	0	0	0	0	0	158	0	0	0	0	0	0
chr19	58220194	58220794	58220574	58220850	240	10	0	0																1				600	0	56	184		0	0	0	0	0	0	0	0	0	0	0	0	0	0	0	184	0
chr19	58220194	58220794	58220576	58220700	124	0	5	1		1																		600	0	0	124		0	124	0	0	0	0	0	0	0	0	0	0	0	0	0	0	0
chr19	58220194	58220794	58220578	58220698	120	1	4	0.8	1																			600	0	0	120		120	0	0	0	0	0	0	0	0	0	0	0	0	0	0	0	0
chr19	58220194	58220794	58220578	58220749	171	7	0	0											1									600	0	0	171		0	0	0	0	0	0	0	0	0	0	171	0	0	0	0	0	0
chr19	58220194	58220794	58220579	58220694	115	5	0	0													1							600	0	0	115		0	0	0	0	0	0	0	0	0	0	0	0	115	0	0	0	0
chr19	58220194	58220794	58220580	58220706	126	5	0	0														1						600	0	0	126		0	0	0	0	0	0	0	0	0	0	0	0	0	126	0	0	0
chr19	58220194	58220794	58220582	58220731	149	7	0	0										1										600	0	0	149		0	0	0	0	0	0	0	0	0	149	0	0	0	0	0	0	0
chr19	58220194	58220794	58220582	58220790	208	4	6	0.6		1																		600	0	0	208		0	208	0	0	0	0	0	0	0	0	0	0	0	0	0	0	0
chr19	58220194	58220794	58220583	58220705	122	5	0	0													1							600	0	0	122		0	0	0	0	0	0	0	0	0	0	0	0	122	0	0	0	0
chr19	58220194	58220794	58220583	58220714	131	6	0	0														1						600	0	0	131		0	0	0	0	0	0	0	0	0	0	0	0	0	131	0	0	0
chr19	58220194	58220794	58220584	58220738	154	7	0	0													1							600	0	0	154		0	0	0	0	0	0	0	0	0	0	0	0	154	0	0	0	0
chr19	58220194	58220794	58220584	58220740	156	7	0	0												1								600	0	0	156		0	0	0	0	0	0	0	0	0	0	0	156	0	0	0	0	0
chr19	58220194	58220794	58220584	58220770	186	7	2	0.222222					1															600	0	0	186		0	0	0	0	186	0	0	0	0	0	0	0	0	0	0	0	0
chr19	58220194	58220794	58220585	58220706	62	3	3	0.5	1																			600	0	0	62		62	0	0	0	0	0	0	0	0	0	0	0	0	0	0	0	0
chr19	58220194	58220794	58220586	58220709	123	6	0	0			1																	600	0	0	123		0	0	123	0	0	0	0	0	0	0	0	0	0	0	0	0	0
chr19	58220194	58220794	58220587	58220715	128	6	0	0														1						600	0	0	128		0	0	0	0	0	0	0	0	0	0	0	0	0	128	0	0	0
chr19	58220194	58220794	58220587	58220736	149	7	0	0											1									600	0	0	149		0	0	0	0	0	0	0	0	0	0	149	0	0	0	0	0	0
chr19	58220194	58220794	58220588	58220729	141	7	0	0								1												600	0	0	141		0	0	0	0	0	0	0	141	0	0	0	0	0	0	0	0	0
chr19	58220194	58220794	58220589	58220692	103	5	0	0															1					600	0	0	103		0	0	0	0	0	0	0	0	0	0	0	0	0	0	103	0	0
chr19	58220194	58220794	58220589	58220720	131	7	0	0													1							600	0	0	131		0	0	0	0	0	0	0	0	0	0	0	0	131	0	0	0	0
chr19	58220194	58220794	58220589	58220785	196	10	0	0							1													600	0	0	196		0	0	0	0	0	0	196	0	0	0	0	0	0	0	0	0	0
chr19	58220194	58220794	58220590	58220728	138	7	0	0					1															600	0	0	138		0	0	0	0	138	0	0	0	0	0	0	0	0	0	0	0	0
chr19	58220194	58220794	58220591	58220692	101	5	0	0																1				600	0	0	101		0	0	0	0	0	0	0	0	0	0	0	0	0	0	0	101	0
chr19	58220194	58220794	58220592	58220728	136	7	0	0																		1		600	0	0	136		0	0	0	0	0	0	0	0	0	0	0	0	0	0	0	0	0
chr19	58220194	58220794	58220592	58220729	137	7	0	0								1												600	0	0	137		0	0	0	0	0	0	0	137	0	0	0	0	0	0	0	0	0
chr19	58220194	58220794	58220592	58220738	146	7	0	0													1							600	0	0	146		0	0	0	0	0	0	0	0	0	0	0	0	146	0	0	0	0
chr19	58220194	58220794	58220593	58220728	135	7	0	0											1									600	0	0	135		0	0	0	0	0	0	0	0	0	0	135	0	0	0	0	0	0
chr19	58220194	58220794	58220594	58220739	145	7	0	0																1				600	0	0	145		0	0	0	0	0	0	0	0	0	0	0	0	0	0	0	145	0
chr19	58220194	58220794	58220596	58220692	96	5	0	0											1									600	0	0	96		0	0	0	0	0	0	0	0	0	0	96	0	0	0	0	0	0
chr19	58220194	58220794	58220596	58220727	131	6	0	0					1															600	0	0	131		0	0	0	0	131	0	0	0	0	0	0	0	0	0	0	0	0
chr19	58220194	58220794	58220597	58220756	159	1	6	0.857143		1																		600	0	0	159		0	159	0	0	0	0	0	0	0	0	0	0	0	0	0	0	0
chr19	58220194	58220794	58220597	58220779	182	9	0	0														1						600	0	0	182		0	0	0	0	0	0	0	0	0	0	0	0	0	182	0	0	0
chr19	58220194	58220794	58220598	58220744	146	6	0	0								1												600	0	0	146		0	0	0	0	0	0	0	146	0	0	0	0	0	0	0	0	0
chr19	58220194	58220794	58220599	58220736	137	5	0	0																	1			600	0	0	137		0	0	0	0	0	0	0	0	0	0	0	0	0	0	0	0	137
chr19	58220194	58220794	58220599	58220873	241	11	0	0											1									600	0	79	162		0	0	0	0	0	0	0	0	0	0	162	0	0	0	0	0	0
chr19	58220194	58220794	58220600	58220734	134	6	0	0														1						600	0	0	134		0	0	0	0	0	0	0	0	0	0	0	0	0	134	0	0	0
chr19	58220194	58220794	58220600	58220828	228	10	0	0													1							600	0	34	194		0	0	0	0	0	0	0	0	0	0	0	0	194	0	0	0	0
chr19	58220194	58220794	58220601	58220712	111	5	0	0								1												600	0	0	111		0	0	0	0	0	0	0	111	0	0	0	0	0	0	0	0	0
chr19	58220194	58220794	58220601	58220736	135	6	0	0																	1			600	0	0	135		0	0	0	0	0	0	0	0	0	0	0	0	0	0	0	0	135
chr19	58220194	58220794	58220601	58220748	147	5	0	0																1				600	0	0	147		0	0	0	0	0	0	0	0	0	0	0	0	0	0	0	147	0
chr19	58220194	58220794	58220603	58220739	136	5	0	0												1								600	0	0	136		0	0	0	0	0	0	0	0	0	0	0	136	0	0	0	0	0
chr19	58220194	58220794	58220603	58220745	142	5	1	0.166667							1													600	0	0	142		0	0	0	0	0	0	142	0	0	0	0	0	0	0	0	0	0
chr19	58220194	58220794	58220603	58220750	147	6	0	0																			1	600	0	0	147		0	0	0	0	0	0	0	0	0	0	0	0	0	0	0	0	0
chr19	58220194	58220794	58220604	58220745	141	5	1	0.166667							1													600	0	0	141		0	0	0	0	0	0	141	0	0	0	0	0	0	0	0	0	0
chr19	58220194	58220794	58220604	58220819	215	9	0	0																			1	600	0	25	190		0	0	0	0	0	0	0	0	0	0	0	0	0	0	0	0	0
chr19	58220194	58220794	58220606	58220877	241	9	1	0.1																1				600	0	83	158		0	0	0	0	0	0	0	0	0	0	0	0	0	0	0	158	0
chr19	58220194	58220794	58220607	58220756	149	7	0	0														1						600	0	0	149		0	0	0	0	0	0	0	0	0	0	0	0	0	149	0	0	0
chr19	58220194	58220794	58220608	58220714	106	5	0	0																	1			600	0	0	106		0	0	0	0	0	0	0	0	0	0	0	0	0	0	0	0	106
chr19	58220194	58220794	58220609	58220729	120	6	0	0																		1		600	0	0	120		0	0	0	0	0	0	0	0	0	0	0	0	0	0	0	0	0
chr19	58220194	58220794	58220610	58220748	138	6	0	0															1					600	0	0	138		0	0	0	0	0	0	0	0	0	0	0	0	0	0	138	0	0
chr19	58220194	58220794	58220610	58220755	145	7	0	0																		1		600	0	0	145		0	0	0	0	0	0	0	0	0	0	0	0	0	0	0	0	0
chr19	58220194	58220794	58220613	58220779	166	9	0	0																		1		600	0	0	166		0	0	0	0	0	0	0	0	0	0	0	0	0	0	0	0	0
chr19	58220194	58220794	58220616	58220754	138	5	2	0.285714																			1	600	0	0	138		0	0	0	0	0	0	0	0	0	0	0	0	0	0	0	0	0
chr19	58220194	58220794	58220617	58220769	152	0	8	1															1					600	0	0	152		0	0	0	0	0	0	0	0	0	0	0	0	0	0	152	0	0
chr19	58220194	58220794	58220618	58220768	150	8	0	0																		1		600	0	0	150		0	0	0	0	0	0	0	0	0	0	0	0	0	0	0	0	0
chr19	58220194	58220794	58220618	58220775	157	9	0	0																	1			600	0	0	157		0	0	0	0	0	0	0	0	0	0	0	0	0	0	0	0	157
chr19	58220194	58220794	58220619	58220761	142	7	0	0																1				600	0	0	142		0	0	0	0	0	0	0	0	0	0	0	0	0	0	0	142	0
chr19	58220194	58220794	58220620	58220741	145	11	0	0			1																	600	0	0	145		0	0	145	0	0	0	0	0	0	0	0	0	0	0	0	0	0
chr19	58220194	58220794	58220620	58220784	164	9	0	0							1													600	0	0	164		0	0	0	0	0	0	164	0	0	0	0	0	0	0	0	0	0
chr19	58220194	58220794	58220623	58220700	77	1	3	0.75		1																		600	0	0	77		0	77	0	0	0	0	0	0	0	0	0	0	0	0	0	0	0
chr19	58220194	58220794	58220623	58220910	242	8	0	0			1																	600	0	116	126		0	0	126	0	0	0	0	0	0	0	0	0	0	0	0	0	0
chr19	58220194	58220794	58220626	58220728	102	6	0	0						1														600	0	0	102		0	0	0	0	0	102	0	0	0	0	0	0	0	0	0	0	0
chr19	58220194	58220794	58220627	58220773	146	7	1	0.125								1												600	0	0	146		0	0	0	0	0	0	0	146	0	0	0	0	0	0	0	0	0
chr19	58220194	58220794	58220630	58220750	120	5	0	0							1													600	0	0	120		0	0	0	0	0	0	120	0	0	0	0	0	0	0	0	0	0
chr19	58220194	58220794	58220631	58220748	117	4	1	0.2											1									600	0	0	117		0	0	0	0	0	0	0	0	0	0	117	0	0	0	0	0	0
chr19	58220194	58220794	58220632	58220773	141	7	0	0																			1	600	0	0	141		0	0	0	0	0	0	0	0	0	0	0	0	0	0	0	0	0
chr19	58220194	58220794	58220632	58220789	157	8	0	0			1																	600	0	0	157		0	0	157	0	0	0	0	0	0	0	0	0	0	0	0	0	0
chr19	58220194	58220794	58220632	58220801	169	5	3	0.375						1														600	0	7	162		0	0	0	0	0	162	0	0	0	0	0	0	0	0	0	0	0
chr19	58220194	58220794	58220633	58220713	80	4	0	0															1					600	0	0	80		0	0	0	0	0	0	0	0	0	0	0	0	0	0	80	0	0
chr19	58220194	58220794	58220633	58220816	183	8	0	0											1									600	0	22	161		0	0	0	0	0	0	0	0	0	0	161	0	0	0	0	0	0
chr19	58220194	58220794	58220633	58220889	240	7	1	0.125								1												600	0	95	145		0	0	0	0	0	0	0	145	0	0	0	0	0	0	0	0	0
chr19	58220194	58220794	58220635	58220756	121	6	0	0								1												600	0	0	121		0	0	0	0	0	0	0	121	0	0	0	0	0	0	0	0	0
chr19	58220194	58220794	58220638	58220785	147	8	0	0																1				600	0	0	147		0	0	0	0	0	0	0	0	0	0	0	0	0	0	0	147	0
chr19	58220194	58220794	58220639	58220759	120	6	0	0				1																600	0	0	120		0	0	0	120	0	0	0	0	0	0	0	0	0	0	0	0	0
chr19	58220194	58220794	58220639	58220760	121	6	0	0						1														600	0	0	121		0	0	0	0	0	121	0	0	0	0	0	0	0	0	0	0	0
chr19	58220194	58220794	58220646	58220788	142	7	1	0.125						1														600	0	0	142		0	0	0	0	0	142	0	0	0	0	0	0	0	0	0	0	0
chr19	58220194	58220794	58220648	58220784	136	1	7	0.875													1							600	0	0	136		0	0	0	0	0	0	0	0	0	0	0	0	136	0	0	0	0
chr19	58220194	58220794	58220648	58220816	168	8	0	0			1																	600	0	22	146		0	0	146	0	0	0	0	0	0	0	0	0	0	0	0	0	0
chr19	58220194	58220794	58220649	58220787	138	8	0	0															1					600	0	0	138		0	0	0	0	0	0	0	0	0	0	0	0	0	0	138	0	0
chr19	58220194	58220794	58220649	58220796	147	8	0	0			1																	600	0	2	145		0	0	145	0	0	0	0	0	0	0	0	0	0	0	0	0	0
chr19	58220194	58220794	58220649	58220806	157	8	0	0										1										600	0	12	145		0	0	0	0	0	0	0	0	0	145	0	0	0	0	0	0	0
chr19	58220194	58220794	58220649	58220910	241	4	5	0.555556				1																600	0	116	125		0	0	0	125	0	0	0	0	0	0	0	0	0	0	0	0	0
chr19	58220194	58220794	58220652	58220742	90	5	0	0																	1			600	0	0	90		0	0	0	0	0	0	0	0	0	0	0	0	0	0	0	0	90
chr19	58220194	58220794	58220656	58220792	136	8	0	0											1									600	0	0	136		0	0	0	0	0	0	0	0	0	0	136	0	0	0	0	0	0
chr19	58220194	58220794	58220656	58220815	159	8	0	0																	1			600	0	21	138		0	0	0	0	0	0	0	0	0	0	0	0	0	0	0	0	138
chr19	58220194	58220794	58220658	58220887	229	7	2	0.222222														1						600	0	93	136		0	0	0	0	0	0	0	0	0	0	0	0	0	136	0	0	0
chr19	58220194	58220794	58220659	58220781	122	7	0	0																		1		600	0	0	122		0	0	0	0	0	0	0	0	0	0	0	0	0	0	0	0	0
chr19	58220194	58220794	58220659	58220799	140	4	3	0.428571		1																		600	0	5	135		0	135	0	0	0	0	0	0	0	0	0	0	0	0	0	0	0
chr19	58220194	58220794	58220659	58220812	153	7	0	0							1													600	0	18	135		0	0	0	0	0	0	135	0	0	0	0	0	0	0	0	0	0
chr19	58220194	58220794	58220661	58220782	121	7	0	0								1												600	0	0	121		0	0	0	0	0	0	0	121	0	0	0	0	0	0	0	0	0
chr19	58220194	58220794	58220662	58220786	124	7	0	0								1												600	0	0	124		0	0	0	0	0	0	0	124	0	0	0	0	0	0	0	0	0
chr19	58220194	58220794	58220662	58220803	141	2	5	0.714286									1											600	0	9	132		0	0	0	0	0	0	0	0	132	0	0	0	0	0	0	0	0
chr19	58220194	58220794	58220663	58220808	145	6	0	0																		1		600	0	14	131		0	0	0	0	0	0	0	0	0	0	0	0	0	0	0	0	0
chr19	58220194	58220794	58220664	58220822	158	7	0	0																		1		600	0	28	130		0	0	0	0	0	0	0	0	0	0	0	0	0	0	0	0	0
chr19	58220194	58220794	58220664	58220836	172	7	0	0					1															600	0	42	130		0	0	0	0	130	0	0	0	0	0	0	0	0	0	0	0	0
chr19	58220194	58220794	58220665	58220794	129	6	0	0																	1			600	0	0	129		0	0	0	0	0	0	0	0	0	0	0	0	0	0	0	0	129
chr19	58220194	58220794	58220666	58220697	31	0	1	1		1																		600	0	0	31		0	31	0	0	0	0	0	0	0	0	0	0	0	0	0	0	0
chr19	58220194	58220794	58220666	58220700	34	0	1	1	1																			600	0	0	34		34	0	0	0	0	0	0	0	0	0	0	0	0	0	0	0	0
chr19	58220194	58220794	58220666	58220754	88	1	3	0.75	1																			600	0	0	88		88	0	0	0	0	0	0	0	0	0	0	0	0	0	0	0	0
chr19	58220194	58220794	58220666	58220792	126	0	6	1		1																		600	0	0	126		0	126	0	0	0	0	0	0	0	0	0	0	0	0	0	0	0
chr19	58220194	58220794	58220666	58220804	138	6	0	0									1											600	0	10	128		0	0	0	0	0	0	0	0	128	0	0	0	0	0	0	0	0
chr19	58220194	58220794	58220667	58220811	144	6	0	0										1										600	0	17	127		0	0	0	0	0	0	0	0	0	127	0	0	0	0	0	0	0
chr19	58220194	58220794	58220669	58220819	150	5	1	0.166667																	1			600	0	25	125		0	0	0	0	0	0	0	0	0	0	0	0	0	0	0	0	125
chr19	58220194	58220794	58220671	58220817	146	5	0	0																			1	600	0	23	123		0	0	0	0	0	0	0	0	0	0	0	0	0	0	0	0	0
chr19	58220194	58220794	58220671	58220827	156	6	0	0			1																	600	0	33	123		0	0	123	0	0	0	0	0	0	0	0	0	0	0	0	0	0
chr19	58220194	58220794	58220671	58220850	179	7	0	0												1								600	0	56	123		0	0	0	0	0	0	0	0	0	0	0	123	0	0	0	0	0
chr19	58220194	58220794	58220672	58220754	82	2	1	0.333333		1																		600	0	0	82		0	82	0	0	0	0	0	0	0	0	0	0	0	0	0	0	0
chr19	58220194	58220794	58220672	58220793	121	1	4	0.8																1				600	0	0	121		0	0	0	0	0	0	0	0	0	0	0	0	0	0	0	121	0
chr19	58220194	58220794	58220672	58220839	167	7	0	0				1																600	0	45	122		0	0	0	122	0	0	0	0	0	0	0	0	0	0	0	0	0
chr19	58220194	58220794	58220673	58220754	81	2	1	0.333333		1																		600	0	0	81		0	81	0	0	0	0	0	0	0	0	0	0	0	0	0	0	0
chr19	58220194	58220794	58220673	58220790	117	0	5	1		1																		600	0	0	117		0	117	0	0	0	0	0	0	0	0	0	0	0	0	0	0	0
chr19	58220194	58220794	58220674	58220826	152	3	3	0.5																			1	600	0	32	120		0	0	0	0	0	0	0	0	0	0	0	0	0	0	0	0	0
chr19	58220194	58220794	58220675	58220802	127	5	0	0															1					600	0	8	119		0	0	0	0	0	0	0	0	0	0	0	0	0	0	119	0	0
chr19	58220194	58220794	58220677	58220876	199	3	4	0.571429					1															600	0	82	117		0	0	0	0	117	0	0	0	0	0	0	0	0	0	0	0	0
chr19	58220194	58220794	58220681	58220802	121	5	0	0														1						600	0	8	113		0	0	0	0	0	0	0	0	0	0	0	0	0	113	0	0	0
chr19	58220194	58220794	58220681	58220815	134	5	0	0											1									600	0	21	113		0	0	0	0	0	0	0	0	0	0	113	0	0	0	0	0	0
chr19	58220194	58220794	58220681	58220821	140	0	6	1									1											600	0	27	113		0	0	0	0	0	0	0	0	113	0	0	0	0	0	0	0	0
chr19	58220194	58220794	58220682	58220799	117	1	4	0.8	1																			600	0	5	112		112	0	0	0	0	0	0	0	0	0	0	0	0	0	0	0	0
chr19	58220194	58220794	58220682	58220801	119	5	0	0					1															600	0	7	112		0	0	0	0	112	0	0	0	0	0	0	0	0	0	0	0	0
chr19	58220194	58220794	58220682	58220822	140	4	2	0.333333																			1	600	0	28	112		0	0	0	0	0	0	0	0	0	0	0	0	0	0	0	0	0
chr19	58220194	58220794	58220683	58220823	140	6	0	0																	1			600	0	29	111		0	0	0	0	0	0	0	0	0	0	0	0	0	0	0	0	111
chr19	58220194	58220794	58220683	58220840	157	3	4	0.571429											1									600	0	46	111		0	0	0	0	0	0	0	0	0	0	111	0	0	0	0	0	0
chr19	58220194	58220794	58220683	58220854	171	7	0	0																1				600	0	60	111		0	0	0	0	0	0	0	0	0	0	0	0	0	0	0	111	0
chr19	58220194	58220794	58220684	58220829	145	5	1	0.166667				1																600	0	35	110		0	0	0	110	0	0	0	0	0	0	0	0	0	0	0	0	0
chr19	58220194	58220794	58220684	58220858	174	7	0	0																	1			600	0	64	110		0	0	0	0	0	0	0	0	0	0	0	0	0	0	0	0	110
chr19	58220194	58220794	58220684	58220871	187	5	2	0.285714									1											600	0	77	110		0	0	0	0	0	0	0	0	110	0	0	0	0	0	0	0	0
chr19	58220194	58220794	58220686	58220826	140	6	0	0			1																	600	0	32	108		0	0	108	0	0	0	0	0	0	0	0	0	0	0	0	0	0
chr19	58220194	58220794	58220687	58220830	143	6	0	0							1													600	0	36	107		0	0	0	0	0	0	107	0	0	0	0	0	0	0	0	0	0
chr19	58220194	58220794	58220687	58220838	151	6	0	0					1															600	0	44	107		0	0	0	0	107	0	0	0	0	0	0	0	0	0	0	0	0
chr19	58220194	58220794	58220687	58220843	156	7	0	0																		1		600	0	49	107		0	0	0	0	0	0	0	0	0	0	0	0	0	0	0	0	0
chr19	58220194	58220794	58220687	58220853	166	7	0	0						1														600	0	59	107		0	0	0	0	0	107	0	0	0	0	0	0	0	0	0	0	0
chr19	58220194	58220794	58220688	58220819	131	6	0	0											1									600	0	25	106		0	0	0	0	0	0	0	0	0	0	106	0	0	0	0	0	0
chr19	58220194	58220794	58220688	58220850	162	7	0	0					1															600	0	56	106		0	0	0	0	106	0	0	0	0	0	0	0	0	0	0	0	0
chr19	58220194	58220794	58220689	58220848	159	7	0	0									1											600	0	54	105		0	0	0	0	0	0	0	0	105	0	0	0	0	0	0	0	0
chr19	58220194	58220794	58220690	58220815	125	5	0	0																		1		600	0	21	104		0	0	0	0	0	0	0	0	0	0	0	0	0	0	0	0	0
chr19	58220194	58220794	58220691	58220842	151	6	1	0.142857								1												600	0	48	103		0	0	0	0	0	0	0	103	0	0	0	0	0	0	0	0	0
chr19	58220194	58220794	58220692	58220836	144	6	0	0																			1	600	0	42	102		0	0	0	0	0	0	0	0	0	0	0	0	0	0	0	0	0
chr19	58220194	58220794	58220693	58220818	125	5	0	0										1										600	0	24	101		0	0	0	0	0	0	0	0	0	101	0	0	0	0	0	0	0
chr19	58220194	58220794	58220694	58220859	165	7	0	0							1													600	0	65	100		0	0	0	0	0	0	100	0	0	0	0	0	0	0	0	0	0
chr19	58220194	58220794	58220695	58220790	95	0	5	1		1																		600	0	0	95		0	95	0	0	0	0	0	0	0	0	0	0	0	0	0	0	0
chr19	58220194	58220794	58220695	58220883	188	0	7	1		1																		600	0	89	99		0	99	0	0	0	0	0	0	0	0	0	0	0	0	0	0	0
chr19	58220194	58220794	58220696	58220829	133	5	1	0.166667										1										600	0	35	98		0	0	0	0	0	0	0	0	0	98	0	0	0	0	0	0	0
chr19	58220194	58220794	58220697	58220809	112	2	3	0.6											1									600	0	15	97		0	0	0	0	0	0	0	0	0	0	97	0	0	0	0	0	0
chr19	58220194	58220794	58220698	58220831	133	5	1	0.166667													1							600	0	37	96		0	0	0	0	0	0	0	0	0	0	0	0	96	0	0	0	0
chr19	58220194	58220794	58220698	58220833	135	6	0	0				1																600	0	39	96		0	0	0	96	0	0	0	0	0	0	0	0	0	0	0	0	0
chr19	58220194	58220794	58220698	58220834	136	6	0	0																			1	600	0	40	96		0	0	0	0	0	0	0	0	0	0	0	0	0	0	0	0	0
chr19	58220194	58220794	58220698	58220845	147	6	1	0.142857								1												600	0	51	96		0	0	0	0	0	0	0	96	0	0	0	0	0	0	0	0	0
chr19	58220194	58220794	58220698	58220847	149	5	2	0.285714								1												600	0	53	96		0	0	0	0	0	0	0	96	0	0	0	0	0	0	0	0	0
chr19	58220194	58220794	58220699	58220850	151	7	0	0														1						600	0	56	95		0	0	0	0	0	0	0	0	0	0	0	0	0	95	0	0	0
chr19	58220194	58220794	58220699	58220869	170	7	0	0																		1		600	0	75	95		0	0	0	0	0	0	0	0	0	0	0	0	0	0	0	0	0
chr19	58220194	58220794	58220701	58220789	88	1	4	0.8		1																		600	0	0	88		0	88	0	0	0	0	0	0	0	0	0	0	0	0	0	0	0
chr19	58220194	58220794	58220701	58220819	118	6	0	0																		1		600	0	25	93		0	0	0	0	0	0	0	0	0	0	0	0	0	0	0	0	0
chr19	58220194	58220794	58220701	58220843	142	6	1	0.142857												1								600	0	49	93		0	0	0	0	0	0	0	0	0	0	0	93	0	0	0	0	0
chr19	58220194	58220794	58220702	58220837	135	0	6	1															1					600	0	43	92		0	0	0	0	0	0	0	0	0	0	0	0	0	0	92	0	0
chr19	58220194	58220794	58220703	58220845	142	7	0	0																	1			600	0	51	91		0	0	0	0	0	0	0	0	0	0	0	0	0	0	0	0	91
chr19	58220194	58220794	58220703	58220852	149	7	0	0													1							600	0	58	91		0	0	0	0	0	0	0	0	0	0	0	0	91	0	0	0	0
chr19	58220194	58220794	58220703	58220858	155	5	2	0.285714				1																600	0	64	91		0	0	0	91	0	0	0	0	0	0	0	0	0	0	0	0	0
chr19	58220194	58220794	58220704	58220824	120	3	1	0.25																	1			600	0	30	90		0	0	0	0	0	0	0	0	0	0	0	0	0	0	0	0	90
chr19	58220194	58220794	58220706	58220842	136	5	2	0.285714							1													600	0	48	88		0	0	0	0	0	0	88	0	0	0	0	0	0	0	0	0	0
chr19	58220194	58220794	58220706	58220850	144	7	0	0								1												600	0	56	88		0	0	0	0	0	0	0	88	0	0	0	0	0	0	0	0	0
chr19	58220194	58220794	58220706	58220855	149	7	0	0															1					600	0	61	88		0	0	0	0	0	0	0	0	0	0	0	0	0	0	88	0	0
chr19	58220194	58220794	58220706	58220857	151	7	0	0					1															600	0	63	88		0	0	0	0	88	0	0	0	0	0	0	0	0	0	0	0	0
chr19	58220194	58220794	58220706	58220858	152	3	4	0.571429																		1		600	0	64	88		0	0	0	0	0	0	0	0	0	0	0	0	0	0	0	0	0
chr19	58220194	58220794	58220706	58220859	153	7	0	0													1							600	0	65	88		0	0	0	0	0	0	0	0	0	0	0	0	88	0	0	0	0
chr19	58220194	58220794	58220706	58220860	154	7	0	0						1														600	0	66	88		0	0	0	0	0	88	0	0	0	0	0	0	0	0	0	0	0
chr19	58220194	58220794	58220706	58220883	177	7	0	0			1																	600	0	89	88		0	0	88	0	0	0	0	0	0	0	0	0	0	0	0	0	0
chr19	58220194	58220794	58220709	58220842	133	6	0	0										1										600	0	48	85		0	0	0	0	0	0	0	0	0	85	0	0	0	0	0	0	0
chr19	58220194	58220794	58220710	58220823	113	5	0	0																			1	600	0	29	84		0	0	0	0	0	0	0	0	0	0	0	0	0	0	0	0	0
chr19	58220194	58220794	58220712	58220813	101	3	1	0.25												1								600	0	19	82		0	0	0	0	0	0	0	0	0	0	0	82	0	0	0	0	0
chr19	58220194	58220794	58220712	58220829	117	3	2	0.4												1								600	0	35	82		0	0	0	0	0	0	0	0	0	0	0	82	0	0	0	0	0
chr19	58220194	58220794	58220712	58220830	118	5	0	0														1						600	0	36	82		0	0	0	0	0	0	0	0	0	0	0	0	0	82	0	0	0
chr19	58220194	58220794	58220712	58220857	145	6	0	0									1											600	0	63	82		0	0	0	0	0	0	0	0	82	0	0	0	0	0	0	0	0
chr19	58220194	58220794	58220712	58220859	147	6	0	0																	1			600	0	65	82		0	0	0	0	0	0	0	0	0	0	0	0	0	0	0	0	82
chr19	58220194	58220794	58220712	58220866	154	6	0	0															1					600	0	72	82		0	0	0	0	0	0	0	0	0	0	0	0	0	0	82	0	0
chr19	58220194	58220794	58220712	58220879	167	5	1	0.166667			1																	600	0	85	82		0	0	82	0	0	0	0	0	0	0	0	0	0	0	0	0	0
chr19	58220194	58220794	58220713	58220830	117	4	1	0.2														1						600	0	36	81		0	0	0	0	0	0	0	0	0	0	0	0	0	81	0	0	0
chr19	58220194	58220794	58220713	58220833	120	5	0	0															1					600	0	39	81		0	0	0	0	0	0	0	0	0	0	0	0	0	0	81	0	0
chr19	58220194	58220794	58220713	58220836	123	5	0	0																1				600	0	42	81		0	0	0	0	0	0	0	0	0	0	0	0	0	0	0	81	0
chr19	58220194	58220794	58220713	58220843	130	4	2	0.333333																			1	600	0	49	81		0	0	0	0	0	0	0	0	0	0	0	0	0	0	0	0	0
chr19	58220194	58220794	58220713	58220849	136	6	0	0					1															600	0	55	81		0	0	0	0	81	0	0	0	0	0	0	0	0	0	0	0	0
chr19	58220194	58220794	58220713	58220851	138	6	0	0															1					600	0	57	81		0	0	0	0	0	0	0	0	0	0	0	0	0	0	81	0	0
chr19	58220194	58220794	58220713	58220859	146	6	0	0								1	1											600	0	65	81		0	0	0	0	0	0	0	81	81	0	0	0	0	0	0	0	0
chr19	58220194	58220794	58220714	58220807	93	4	0	0															1					600	0	13	80		0	0	0	0	0	0	0	0	0	0	0	0	0	0	80	0	0
chr19	58220194	58220794	58220715	58220836	121	5	0	0																			1	600	0	42	79		0	0	0	0	0	0	0	0	0	0	0	0	0	0	0	0	0
chr19	58220194	58220794	58220715	58220859	144	6	0	0							1													600	0	65	79		0	0	0	0	0	0	79	0	0	0	0	0	0	0	0	0	0
chr19	58220194	58220794	58220715	58220867	152	5	1	0.166667			1																	600	0	73	79		0	0	79	0	0	0	0	0	0	0	0	0	0	0	0	0	0
chr19	58220194	58220794	58220717	58220859	142	6	0	0										1										600	0	65	77		0	0	0	0	0	0	0	0	0	77	0	0	0	0	0	0	0
chr19	58220194	58220794	58220718	58220876	158	6	0	0								1												600	0	82	76		0	0	0	0	0	0	0	76	0	0	0	0	0	0	0	0	0
chr19	58220194	58220794	58220719	58220840	121	5	0	0								1												600	0	46	75		0	0	0	0	0	0	0	75	0	0	0	0	0	0	0	0	0
chr19	58220194	58220794	58220719	58220876	157	5	0	0																			1	600	0	82	75		0	0	0	0	0	0	0	0	0	0	0	0	0	0	0	0	0
chr19	58220194	58220794	58220719	58220891	172	5	0	0																			1	600	0	97	75		0	0	0	0	0	0	0	0	0	0	0	0	0	0	0	0	0
chr19	58220194	58220794	58220720	58220839	119	5	0	0										1										600	0	45	74		0	0	0	0	0	0	0	0	0	74	0	0	0	0	0	0	0
chr19	58220194	58220794	58220720	58220841	121	5	0	0			1																	600	0	47	74		0	0	74	0	0	0	0	0	0	0	0	0	0	0	0	0	0
chr19	58220194	58220794	58220720	58220858	138	5	0	0							1													600	0	64	74		0	0	0	0	0	0	74	0	0	0	0	0	0	0	0	0	0
chr19	58220194	58220794	58220721	58220754	33	0	1	1	1																			600	0	0	33		33	0	0	0	0	0	0	0	0	0	0	0	0	0	0	0	0
chr19	58220194	58220794	58220721	58220790	69	0	3	1		1																		600	0	0	69		0	69	0	0	0	0	0	0	0	0	0	0	0	0	0	0	0
chr19	58220194	58220794	58220721	58220841	120	4	1	0.2																			1	600	0	47	73		0	0	0	0	0	0	0	0	0	0	0	0	0	0	0	0	0
chr19	58220194	58220794	58220721	58220841	120	5	0	0											1									600	0	47	73		0	0	0	0	0	0	0	0	0	0	73	0	0	0	0	0	0
chr19	58220194	58220794	58220721	58220869	148	5	0	0													1							600	0	75	73		0	0	0	0	0	0	0	0	0	0	0	0	73	0	0	0	0
chr19	58220194	58220794	58220721	58220878	157	5	0	0																1				600	0	84	73		0	0	0	0	0	0	0	0	0	0	0	0	0	0	0	73	0
chr19	58220194	58220794	58220722	58220754	32	0	1	1	1																			600	0	0	32		32	0	0	0	0	0	0	0	0	0	0	0	0	0	0	0	0
chr19	58220194	58220794	58220722	58220755	33	0	1	1	1																			600	0	0	33		33	0	0	0	0	0	0	0	0	0	0	0	0	0	0	0	0
chr19	58220194	58220794	58220722	58220790	68	0	3	1	1																			600	0	0	68		68	0	0	0	0	0	0	0	0	0	0	0	0	0	0	0	0
chr19	58220194	58220794	58220722	58220825	103	3	1	0.25																	1			600	0	31	72		0	0	0	0	0	0	0	0	0	0	0	0	0	0	0	0	72
chr19	58220194	58220794	58220722	58220844	122	5	0	0															1					600	0	50	72		0	0	0	0	0	0	0	0	0	0	0	0	0	0	72	0	0
chr19	58220194	58220794	58220722	58220849	127	4	1	0.2																		1		600	0	55	72		0	0	0	0	0	0	0	0	0	0	0	0	0	0	0	0	0
chr19	58220194	58220794	58220723	58220877	154	3	2	0.4												1								600	0	83	71		0	0	0	0	0	0	0	0	0	0	0	71	0	0	0	0	0
chr19	58220194	58220794	58220724	58220790	66	0	3	1	1																			600	0	0	66		66	0	0	0	0	0	0	0	0	0	0	0	0	0	0	0	0
chr19	58220194	58220794	58220724	58220792	68	3	0	0	1																			600	0	0	68		68	0	0	0	0	0	0	0	0	0	0	0	0	0	0	0	0
chr19	58220194	58220794	58220725	58220792	67	0	3	1		1																		600	0	0	67		0	67	0	0	0	0	0	0	0	0	0	0	0	0	0	0	0
chr19	58220194	58220794	58220726	58220790	64	0	3	1	1																			600	0	0	64		64	0	0	0	0	0	0	0	0	0	0	0	0	0	0	0	0
chr19	58220194	58220794	58220726	58220797	71	0	3	1	1																			600	0	3	68		68	0	0	0	0	0	0	0	0	0	0	0	0	0	0	0	0
chr19	58220194	58220794	58220726	58220799	73	0	3	1	1																			600	0	5	68		68	0	0	0	0	0	0	0	0	0	0	0	0	0	0	0	0
chr19	58220194	58220794	58220726	58220879	153	5	0	0				1																600	0	85	68		0	0	0	68	0	0	0	0	0	0	0	0	0	0	0	0	0
chr19	58220194	58220794	58220727	58220799	72	0	3	1		1																		600	0	5	67		0	67	0	0	0	0	0	0	0	0	0	0	0	0	0	0	0
chr19	58220194	58220794	58220727	58220854	127	5	0	0																			1	600	0	60	67		0	0	0	0	0	0	0	0	0	0	0	0	0	0	0	0	0
chr19	58220194	58220794	58220730	58220873	143	5	0	0																1				600	0	79	64		0	0	0	0	0	0	0	0	0	0	0	0	0	0	0	64	0
chr19	58220194	58220794	58220731	58220872	141	5	0	0									1											600	0	78	63		0	0	0	0	0	0	0	0	63	0	0	0	0	0	0	0	0
chr19	58220194	58220794	58220731	58220886	155	5	0	0													1							600	0	92	63		0	0	0	0	0	0	0	0	0	0	0	0	63	0	0	0	0
chr19	58220194	58220794	58220732	58220874	142	5	0	0													1							600	0	80	62		0	0	0	0	0	0	0	0	0	0	0	0	62	0	0	0	0
chr19	58220194	58220794	58220732	58220886	154	5	0	0								1												600	0	92	62		0	0	0	0	0	0	0	62	0	0	0	0	0	0	0	0	0
chr19	58220194	58220794	58220732	58220888	156	5	0	0																1				600	0	94	62		0	0	0	0	0	0	0	0	0	0	0	0	0	0	0	62	0
chr19	58220194	58220794	58220733	58220853	120	4	1	0.2												1								600	0	59	61		0	0	0	0	0	0	0	0	0	0	0	61	0	0	0	0	0
chr19	58220194	58220794	58220733	58220887	154	4	0	0						1														600	0	93	61		0	0	0	0	0	61	0	0	0	0	0	0	0	0	0	0	0
chr19	58220194	58220794	58220733	58220906	173	5	0	0													1							600	0	112	61		0	0	0	0	0	0	0	0	0	0	0	0	61	0	0	0	0
chr19	58220194	58220794	58220734	58220824	90	1	3	0.75	1																			600	0	30	60		60	0	0	0	0	0	0	0	0	0	0	0	0	0	0	0	0
chr19	58220194	58220794	58220734	58220870	136	5	0	0									1											600	0	76	60		0	0	0	0	0	0	0	0	60	0	0	0	0	0	0	0	0
chr19	58220194	58220794	58220734	58220871	137	4	1	0.2												1								600	0	77	60		0	0	0	0	0	0	0	0	0	0	0	60	0	0	0	0	0
chr19	58220194	58220794	58220735	58220868	133	5	0	0								1												600	0	74	59		0	0	0	0	0	0	0	59	0	0	0	0	0	0	0	0	0
chr19	58220194	58220794	58220735	58220869	134	4	1	0.2					1															600	0	75	59		0	0	0	0	59	0	0	0	0	0	0	0	0	0	0	0	0
chr19	58220194	58220794	58220735	58220876	141	5	0	0																			1	600	0	82	59		0	0	0	0	0	0	0	0	0	0	0	0	0	0	0	0	0
chr19	58220194	58220794	58220735	58220889	154	5	0	0																			1	600	0	95	59		0	0	0	0	0	0	0	0	0	0	0	0	0	0	0	0	0
chr19	58220194	58220794	58220736	58220805	69	3	0	0															1					600	0	11	58		0	0	0	0	0	0	0	0	0	0	0	0	0	0	58	0	0
chr19	58220194	58220794	58220736	58220824	88	4	0	0								1												600	0	30	58		0	0	0	0	0	0	0	58	0	0	0	0	0	0	0	0	0
chr19	58220194	58220794	58220736	58220871	135	5	0	0																	1			600	0	77	58		0	0	0	0	0	0	0	0	0	0	0	0	0	0	0	0	58
chr19	58220194	58220794	58220736	58220874	138	5	0	0					1															600	0	80	58		0	0	0	0	58	0	0	0	0	0	0	0	0	0	0	0	0
chr19	58220194	58220794	58220738	58220868	130	5	0	0												1								600	0	74	56		0	0	0	0	0	0	0	0	0	0	0	56	0	0	0	0	0
chr19	58220194	58220794	58220740	58220878	138	4	1	0.2																1				600	0	84	54		0	0	0	0	0	0	0	0	0	0	0	0	0	0	0	54	0
chr19	58220194	58220794	58220740	58220882	142	2	3	0.6				1																600	0	88	54		0	0	0	54	0	0	0	0	0	0	0	0	0	0	0	0	0
chr19	58220194	58220794	58220741	58220874	133	4	1	0.2												1								600	0	80	53		0	0	0	0	0	0	0	0	0	0	0	53	0	0	0	0	0
chr19	58220194	58220794	58220743	58220828	85	4	0	0			1																	600	0	34	51		0	0	51	0	0	0	0	0	0	0	0	0	0	0	0	0	0
chr19	58220194	58220794	58220743	58220843	100	5	0	0																			1	600	0	49	51		0	0	0	0	0	0	0	0	0	0	0	0	0	0	0	0	0
chr19	58220194	58220794	58220743	58220883	140	5	0	0										1										600	0	89	51		0	0	0	0	0	0	0	0	0	51	0	0	0	0	0	0	0
chr19	58220194	58220794	58220744	58220864	120	3	2	0.4														1						600	0	70	50		0	0	0	0	0	0	0	0	0	0	0	0	0	50	0	0	0
chr19	58220194	58220794	58220744	58220871	127	4	1	0.2				1																600	0	77	50		0	0	0	50	0	0	0	0	0	0	0	0	0	0	0	0	0
chr19	58220194	58220794	58220744	58220889	145	5	0	0								1												600	0	95	50		0	0	0	0	0	0	0	50	0	0	0	0	0	0	0	0	0
chr19	58220194	58220794	58220745	58220866	121	2	3	0.6																			1	600	0	72	49		0	0	0	0	0	0	0	0	0	0	0	0	0	0	0	0	0
chr19	58220194	58220794	58220745	58220888	143	5	0	0												1								600	0	94	49		0	0	0	0	0	0	0	0	0	0	0	49	0	0	0	0	0
chr19	58220194	58220794	58220746	58220911	165	4	1	0.2										1										600	0	117	48		0	0	0	0	0	0	0	0	0	48	0	0	0	0	0	0	0
chr19	58220194	58220794	58220747	58220878	131	5	0	0			1																	600	0	84	47		0	0	47	0	0	0	0	0	0	0	0	0	0	0	0	0	0
chr19	58220194	58220794	58220748	58220860	112	5	0	0													1							600	0	66	46		0	0	0	0	0	0	0	0	0	0	0	0	46	0	0	0	0
chr19	58220194	58220794	58220749	58220869	120	5	0	0									1											600	0	75	45		0	0	0	0	0	0	0	0	45	0	0	0	0	0	0	0	0
chr19	58220194	58220794	58220749	58220885	136	5	0	0																	1			600	0	91	45		0	0	0	0	0	0	0	0	0	0	0	0	0	0	0	0	45
chr19	58220194	58220794	58220751	58220841	90	0	5	1		1																		600	0	47	43		0	43	0	0	0	0	0	0	0	0	0	0	0	0	0	0	0
chr19	58220194	58220794	58220751	58220869	118	5	0	0															1					600	0	75	43		0	0	0	0	0	0	0	0	0	0	0	0	0	0	43	0	0
chr19	58220194	58220794	58220752	58220872	120	5	0	0					1															600	0	78	42		0	0	0	0	42	0	0	0	0	0	0	0	0	0	0	0	0
chr19	58220194	58220794	58220753	58220854	101	4	1	0.2																		1		600	0	60	41		0	0	0	0	0	0	0	0	0	0	0	0	0	0	0	0	0
chr19	58220194	58220794	58220754	58220888	134	2	2	0.5																			1	600	0	94	40		0	0	0	0	0	0	0	0	0	0	0	0	0	0	0	0	0
chr19	58220194	58220794	58220755	58220855	100	1	3	0.75	1																			600	0	61	39		39	0	0	0	0	0	0	0	0	0	0	0	0	0	0	0	0
chr19	58220194	58220794	58220755	58220876	121	0	4	1		1																		600	0	82	39		0	39	0	0	0	0	0	0	0	0	0	0	0	0	0	0	0
chr19	58220194	58220794	58220755	58220876	121	1	3	0.75	1																			600	0	82	39		39	0	0	0	0	0	0	0	0	0	0	0	0	0	0	0	0
chr19	58220194	58220794	58220755	58220876	121	2	2	0.5		1																		600	0	82	39		0	39	0	0	0	0	0	0	0	0	0	0	0	0	0	0	0
chr19	58220194	58220794	58220755	58220876	121	3	1	0.25			1																	600	0	82	39		0	0	39	0	0	0	0	0	0	0	0	0	0	0	0	0	0
chr19	58220194	58220794	58220755	58220876	121	4	0	0		1									1									600	0	82	39		0	39	0	0	0	0	0	0	0	0	39	0	0	0	0	0	0
chr19	58220194	58220794	58220755	58220901	146	2	2	0.5				1																600	0	107	39		0	0	0	39	0	0	0	0	0	0	0	0	0	0	0	0	0
chr19	58220194	58220794	58220756	58220886	130	4	0	0			1																	600	0	92	38		0	0	38	0	0	0	0	0	0	0	0	0	0	0	0	0	0
chr19	58220194	58220794	58220756	58220910	154	4	0	0			1																	600	0	116	38		0	0	38	0	0	0	0	0	0	0	0	0	0	0	0	0	0
chr19	58220194	58220794	58220757	58220891	134	3	1	0.25				1																600	0	97	37		0	0	0	37	0	0	0	0	0	0	0	0	0	0	0	0	0
chr19	58220194	58220794	58220757	58220910	153	4	0	0										1										600	0	116	37		0	0	0	0	0	0	0	0	0	37	0	0	0	0	0	0	0
chr19	58220194	58220794	58220758	58220878	120	1	3	0.75											1									600	0	84	36		0	0	0	0	0	0	0	0	0	0	36	0	0	0	0	0	0
chr19	58220194	58220794	58220758	58220883	125	4	0	0																	1			600	0	89	36		0	0	0	0	0	0	0	0	0	0	0	0	0	0	0	0	36
chr19	58220194	58220794	58220758	58220901	143	3	1	0.25																		1		600	0	107	36		0	0	0	0	0	0	0	0	0	0	0	0	0	0	0	0	0
chr19	58220194	58220794	58220759	58220879	120	4	0	0									1											600	0	85	35		0	0	0	0	0	0	0	0	35	0	0	0	0	0	0	0	0
chr19	58220194	58220794	58220760	58220871	111	4	0	0														1						600	0	77	34		0	0	0	0	0	0	0	0	0	0	0	0	0	34	0	0	0
chr19	58220194	58220794	58220760	58220913	153	4	0	0																			1	600	0	119	34		0	0	0	0	0	0	0	0	0	0	0	0	0	0	0	0	0
chr19	58220194	58220794	58220761	58220871	110	3	1	0.25																		1		600	0	77	33		0	0	0	0	0	0	0	0	0	0	0	0	0	0	0	0	0
chr19	58220194	58220794	58220761	58220872	111	4	0	0												1								600	0	78	33		0	0	0	0	0	0	0	0	0	0	0	33	0	0	0	0	0
chr19	58220194	58220794	58220761	58220901	140	4	0	0							1													600	0	107	33		0	0	0	0	0	0	33	0	0	0	0	0	0	0	0	0	0
chr19	58220194	58220794	58220761	58220911	150	4	0	0				1																600	0	117	33		0	0	0	33	0	0	0	0	0	0	0	0	0	0	0	0	0
chr19	58220194	58220794	58220764	58220885	121	4	0	0													1							600	0	91	30		0	0	0	0	0	0	0	0	0	0	0	0	30	0	0	0	0
chr19	58220194	58220794	58220764	58220909	145	4	0	0						1														600	0	115	30		0	0	0	0	0	30	0	0	0	0	0	0	0	0	0	0	0
chr19	58220194	58220794	58220766	58220885	119	2	2	0.5										1										600	0	91	28		0	0	0	0	0	0	0	0	0	28	0	0	0	0	0	0	0
chr19	58220194	58220794	58220769	58220891	122	3	0	0			1																	600	0	97	25		0	0	25	0	0	0	0	0	0	0	0	0	0	0	0	0	0
chr19	58220194	58220794	58220770	58220891	121	3	0	0									1											600	0	97	24		0	0	0	0	0	0	0	0	24	0	0	0	0	0	0	0	0
chr19	58220194	58220794	58220770	58220913	143	3	0	0																1				600	0	119	24		0	0	0	0	0	0	0	0	0	0	0	0	0	0	0	24	0
chr19	58220194	58220794	58220771	58220909	138	3	0	0																	1			600	0	115	23		0	0	0	0	0	0	0	0	0	0	0	0	0	0	0	0	23
chr19	58220194	58220794	58220773	58220883	110	3	0	0																1				600	0	89	21		0	0	0	0	0	0	0	0	0	0	0	0	0	0	0	21	0
chr19	58220194	58220794	58220774	58220895	121	2	0	0			1												1		1			600	0	101	20		0	0	20	0	0	0	0	0	0	0	0	0	0	0	20	0	20
chr19	58220194	58220794	58220775	58220896	121	2	0	0											1		1		1					600	0	102	19		0	0	0	0	0	0	0	0	0	0	19	0	19	0	19	0	0
chr19	58220194	58220794	58220775	58220909	134	2	0	0																			1	600	0	115	19		0	0	0	0	0	0	0	0	0	0	0	0	0	0	0	0	0
chr19	58220194	58220794	58220775	58220911	136	2	0	0																			1	600	0	117	19		0	0	0	0	0	0	0	0	0	0	0	0	0	0	0	0	0
chr19	58220194	58220794	58220775	58220912	137	2	0	0																	1			600	0	118	19		0	0	0	0	0	0	0	0	0	0	0	0	0	0	0	0	19
chr19	58220194	58220794	58220776	58220897	121	1	1	0.5				1																600	0	103	18		0	0	0	18	0	0	0	0	0	0	0	0	0	0	0	0	0
chr19	58220194	58220794	58220776	58220897	121	2	0	0								1											1	600	0	103	18		0	0	0	0	0	0	0	18	0	0	0	0	0	0	0	0	0
chr19	58220194	58220794	58220777	58220898	121	1	1	0.5											1									600	0	104	17		0	0	0	0	0	0	0	0	0	0	17	0	0	0	0	0	0
chr19	58220194	58220794	58220777	58220898	121	2	0	0							1									1				600	0	104	17		0	0	0	0	0	0	17	0	0	0	0	0	0	0	0	17	0
chr19	58220194	58220794	58220778	58220898	120	2	0	0																2				600	0	104	16		0	0	0	0	0	0	0	0	0	0	0	0	0	0	0	32	0
chr19	58220194	58220794	58220781	58220888	107	2	0	0																		1		600	0	94	13		0	0	0	0	0	0	0	0	0	0	0	0	0	0	0	0	0
chr19	58220194	58220794	58220782	58220879	97	2	0	0																			1	600	0	85	12		0	0	0	0	0	0	0	0	0	0	0	0	0	0	0	0	0
chr19	58220194	58220794	58220785	58220906	121	2	0	0			1						1				1							600	0	112	9		0	0	9	0	0	0	0	0	9	0	0	0	9	0	0	0	0
chr19	58220194	58220794	58220787	58220907	120	2	0	0						1													1	600	0	113	7		0	0	0	0	0	7	0	0	0	0	0	0	0	0	0	0	0
chr19	58220194	58220794	58220789	58220910	121	2	0	0																		1		600	0	116	5		0	0	0	0	0	0	0	0	0	0	0	0	0	0	0	0	0
chr19	58220194	58220794	58220791	58220891	100	2	0	0														1						600	0	97	3		0	0	0	0	0	0	0	0	0	0	0	0	0	3	0	0	0
chr19	58220194	58220794	58220791	58220910	119	2	0	0												1								600	0	116	3		0	0	0	0	0	0	0	0	0	0	0	3	0	0	0	0	0
chr19	58220194	58220794	58220792	58220912	120	2	0	0						1														600	0	118	2		0	0	0	0	0	2	0	0	0	0	0	0	0	0	0	0	0
									131	181	52	45	23	35	38	43	40	32	36	43	43	38	46	47	37	44	42						12570	19780	6489	5502	2786	4545	4946	5192	4750	4355	4504	4746	5037	4488	5494	5231	4116
																																	20.95	32.9667	10.815	9.17	4.64333	7.575	8.24333	8.65333	7.91667	7.25833	7.50667	7.91	8.395	7.48	9.15667	8.71833	6.86
																																	average liver tissue
																																	26.9583
																																	average lung tumor cfDNA
																																	7.17817
																																	average normal CfDNA
																																	8.00375
																																	average liver cfDNA
																																	8.23542
[truncated: 3 more columns]

## Sheet: UCL_GALR1
chr	interval_start	interval_stop	methSeqStart	methSeqStop	methSeqLength	numU	numM	MD	HCC1	HCC2	L948	L954	L955	L962	L964	L978	L982	L987	L989	LIC1L	LIC2L	LIC3L	LIC4L	N1L	N2L	N3L	N4L		clipFromStart	clipFromStop	useFragLen		HCC1	HCC2	L948	L954	L955	L962	L964	L978	L982	L987	L989	LIC1L	LIC2L	LIC3L	LIC4L	N1L	N2L
chr18	74961833	74962433	74961714	74961852	138	10	2	0.166667																1				600	119	0	19		0	0	0	0	0	0	0	0	0	0	0	0	0	0	0	19	0
chr18	74961833	74962433	74961717	74961838	121	11	0	0													1							600	116	0	5		0	0	0	0	0	0	0	0	0	0	0	0	5	0	0	0	0
chr18	74961833	74962433	74961722	74961842	120	11	0	0		1																		600	111	0	9		0	9	0	0	0	0	0	0	0	0	0	0	0	0	0	0	0
chr18	74961833	74962433	74961722	74961879	157	12	0	0			1																	600	111	0	46		0	0	46	0	0	0	0	0	0	0	0	0	0	0	0	0	0
chr18	74961833	74962433	74961723	74961838	115	11	0	0	1																			600	110	0	5		5	0	0	0	0	0	0	0	0	0	0	0	0	0	0	0	0
chr18	74961833	74962433	74961723	74961843	120	11	0	0																			1	600	110	0	10		0	0	0	0	0	0	0	0	0	0	0	0	0	0	0	0	0
chr18	74961833	74962433	74961723	74961843	120	12	0	0															1					600	110	0	10		0	0	0	0	0	0	0	0	0	0	0	0	0	0	10	0	0
chr18	74961833	74962433	74961723	74961896	173	12	1	0.0769231	1																			600	110	0	63		63	0	0	0	0	0	0	0	0	0	0	0	0	0	0	0	0
chr18	74961833	74962433	74961724	74961846	122	11	1	0.0833333	1																			600	109	0	13		13	0	0	0	0	0	0	0	0	0	0	0	0	0	0	0	0
chr18	74961833	74962433	74961724	74961848	124	12	0	0		1																		600	109	0	15		0	15	0	0	0	0	0	0	0	0	0	0	0	0	0	0	0
chr18	74961833	74962433	74961725	74961846	121	12	0	0									1											600	108	0	13		0	0	0	0	0	0	0	0	13	0	0	0	0	0	0	0	0
chr18	74961833	74962433	74961725	74961878	153	12	0	0		1																		600	108	0	45		0	45	0	0	0	0	0	0	0	0	0	0	0	0	0	0	0
chr18	74961833	74962433	74961726	74961847	121	11	0	0		1									1									600	107	0	14		0	14	0	0	0	0	0	0	0	0	14	0	0	0	0	0	0
chr18	74961833	74962433	74961726	74961858	132	11	0	0								1												600	107	0	25		0	0	0	0	0	0	0	25	0	0	0	0	0	0	0	0	0
chr18	74961833	74962433	74961728	74961980	241	23	0	0						1														600	105	0	136		0	0	0	0	0	136	0	0	0	0	0	0	0	0	0	0	0
chr18	74961833	74962433	74961729	74961878	149	10	0	0													1							600	104	0	45		0	0	0	0	0	0	0	0	0	0	0	0	45	0	0	0	0
chr18	74961833	74962433	74961729	74961905	176	13	0	0																1				600	104	0	72		0	0	0	0	0	0	0	0	0	0	0	0	0	0	0	72	0
chr18	74961833	74962433	74961730	74961844	114	9	0	0									1											600	103	0	11		0	0	0	0	0	0	0	0	11	0	0	0	0	0	0	0	0
chr18	74961833	74962433	74961730	74961851	121	10	0	0										1										600	103	0	18		0	0	0	0	0	0	0	0	0	18	0	0	0	0	0	0	0
chr18	74961833	74962433	74961730	74961897	167	12	0	0													1							600	103	0	64		0	0	0	0	0	0	0	0	0	0	0	0	64	0	0	0	0
chr18	74961833	74962433	74961731	74961852	121	10	0	0			1																	600	102	0	19		0	0	19	0	0	0	0	0	0	0	0	0	0	0	0	0	0
chr18	74961833	74962433	74961733	74961869	136	8	2	0.2																1				600	100	0	36		0	0	0	0	0	0	0	0	0	0	0	0	0	0	0	36	0
chr18	74961833	74962433	74961733	74961901	168	13	0	0																			1	600	100	0	68		0	0	0	0	0	0	0	0	0	0	0	0	0	0	0	0	0
chr18	74961833	74962433	74961733	74961906	173	13	0	0						1														600	100	0	73		0	0	0	0	0	73	0	0	0	0	0	0	0	0	0	0	0
chr18	74961833	74962433	74961734	74961855	121	10	0	0											1									600	99	0	22		0	0	0	0	0	0	0	0	0	0	22	0	0	0	0	0	0
chr18	74961833	74962433	74961736	74961856	120	10	0	0										1	1									600	97	0	23		0	0	0	0	0	0	0	0	0	23	23	0	0	0	0	0	0
chr18	74961833	74962433	74961736	74961857	121	10	0	0														1					1	600	97	0	24		0	0	0	0	0	0	0	0	0	0	0	0	0	24	0	0	0
chr18	74961833	74962433	74961736	74961866	130	10	0	0											1									600	97	0	33		0	0	0	0	0	0	0	0	0	0	33	0	0	0	0	0	0
chr18	74961833	74962433	74961740	74961846	106	9	0	0															1					600	93	0	13		0	0	0	0	0	0	0	0	0	0	0	0	0	0	13	0	0
chr18	74961833	74962433	74961740	74961920	180	13	0	0									1											600	93	0	87		0	0	0	0	0	0	0	0	87	0	0	0	0	0	0	0	0
chr18	74961833	74962433	74961742	74961848	106	9	0	0								1												600	91	0	15		0	0	0	0	0	0	0	15	0	0	0	0	0	0	0	0	0
chr18	74961833	74962433	74961744	74961897	153	11	0	0											1									600	89	0	64		0	0	0	0	0	0	0	0	0	0	64	0	0	0	0	0	0
chr18	74961833	74962433	74961745	74961888	143	10	0	0				1																600	88	0	55		0	0	0	55	0	0	0	0	0	0	0	0	0	0	0	0	0
chr18	74961833	74962433	74961746	74961879	133	9	0	0																			1	600	87	0	46		0	0	0	0	0	0	0	0	0	0	0	0	0	0	0	0	0
chr18	74961833	74962433	74961747	74961925	178	13	0	0					1															600	86	0	92		0	0	0	0	92	0	0	0	0	0	0	0	0	0	0	0	0
chr18	74961833	74962433	74961748	74961847	99	9	0	0		1																		600	85	0	14		0	14	0	0	0	0	0	0	0	0	0	0	0	0	0	0	0
chr18	74961833	74962433	74961748	74961990	241	21	0	0		1																		600	85	0	156		0	156	0	0	0	0	0	0	0	0	0	0	0	0	0	0	0
chr18	74961833	74962433	74961749	74961897	148	10	0	0																			1	600	84	0	64		0	0	0	0	0	0	0	0	0	0	0	0	0	0	0	0	0
chr18	74961833	74962433	74961750	74961851	101	8	0	0																	1			600	83	0	18		0	0	0	0	0	0	0	0	0	0	0	0	0	0	0	0	18
chr18	74961833	74962433	74961750	74961920	170	12	0	0							1													600	83	0	87		0	0	0	0	0	0	87	0	0	0	0	0	0	0	0	0	0
chr18	74961833	74962433	74961751	74961844	93	7	0	0	1																			600	82	0	11		11	0	0	0	0	0	0	0	0	0	0	0	0	0	0	0	0
chr18	74961833	74962433	74961751	74961847	96	8	0	0		1																		600	82	0	14		0	14	0	0	0	0	0	0	0	0	0	0	0	0	0	0	0
chr18	74961833	74962433	74961751	74961872	121	8	0	0							1													600	82	0	39		0	0	0	0	0	0	39	0	0	0	0	0	0	0	0	0	0
chr18	74961833	74962433	74961751	74961876	125	7	1	0.125							1													600	82	0	43		0	0	0	0	0	0	43	0	0	0	0	0	0	0	0	0	0
chr18	74961833	74962433	74961753	74961887	134	8	1	0.111111													1							600	80	0	54		0	0	0	0	0	0	0	0	0	0	0	0	54	0	0	0	0
chr18	74961833	74962433	74961753	74961896	143	10	0	0									1											600	80	0	63		0	0	0	0	0	0	0	0	63	0	0	0	0	0	0	0	0
chr18	74961833	74962433	74961753	74961957	204	14	0	0						1														600	80	0	124		0	0	0	0	0	124	0	0	0	0	0	0	0	0	0	0	0
chr18	74961833	74962433	74961756	74961871	115	8	0	0															1					600	77	0	38		0	0	0	0	0	0	0	0	0	0	0	0	0	0	38	0	0
chr18	74961833	74962433	74961756	74961875	119	8	0	0												1								600	77	0	42		0	0	0	0	0	0	0	0	0	0	0	42	0	0	0	0	0
chr18	74961833	74962433	74961756	74961887	131	9	0	0											1									600	77	0	54		0	0	0	0	0	0	0	0	0	0	54	0	0	0	0	0	0
chr18	74961833	74962433	74961756	74961911	155	11	0	0		1																		600	77	0	78		0	78	0	0	0	0	0	0	0	0	0	0	0	0	0	0	0
chr18	74961833	74962433	74961756	74961932	176	12	1	0.0769231										1										600	77	0	99		0	0	0	0	0	0	0	0	0	99	0	0	0	0	0	0	0
chr18	74961833	74962433	74961757	74961878	121	8	0	0										1		1								600	76	0	45		0	0	0	0	0	0	0	0	0	45	0	45	0	0	0	0	0
chr18	74961833	74962433	74961759	74961907	148	11	0	0											1									600	74	0	74		0	0	0	0	0	0	0	0	0	0	74	0	0	0	0	0	0
chr18	74961833	74962433	74961760	74961849	89	7	1	0.125			1																	600	73	0	16		0	0	16	0	0	0	0	0	0	0	0	0	0	0	0	0	0
chr18	74961833	74962433	74961762	74961931	169	13	0	0							1													600	71	0	98		0	0	0	0	0	0	98	0	0	0	0	0	0	0	0	0	0
chr18	74961833	74962433	74961762	74961949	187	14	0	0																			1	600	71	0	116		0	0	0	0	0	0	0	0	0	0	0	0	0	0	0	0	0
chr18	74961833	74962433	74961763	74961907	144	11	0	0																1				600	70	0	74		0	0	0	0	0	0	0	0	0	0	0	0	0	0	0	74	0
chr18	74961833	74962433	74961764	74961875	111	7	0	0																	1			600	69	0	42		0	0	0	0	0	0	0	0	0	0	0	0	0	0	0	0	42
chr18	74961833	74962433	74961764	74962115	242	21	0	0													1							600	69	0	173		0	0	0	0	0	0	0	0	0	0	0	0	173	0	0	0	0
chr18	74961833	74962433	74961765	74961906	141	10	0	0						1														600	68	0	73		0	0	0	0	0	73	0	0	0	0	0	0	0	0	0	0	0
chr18	74961833	74962433	74961765	74961920	155	11	0	0																1				600	68	0	87		0	0	0	0	0	0	0	0	0	0	0	0	0	0	0	87	0
chr18	74961833	74962433	74961766	74961945	179	12	0	0														1						600	67	0	112		0	0	0	0	0	0	0	0	0	0	0	0	0	112	0	0	0
chr18	74961833	74962433	74961767	74961939	172	12	0	0				1																600	66	0	106		0	0	0	106	0	0	0	0	0	0	0	0	0	0	0	0	0
chr18	74961833	74962433	74961768	74961901	133	8	0	0																			1	600	65	0	68		0	0	0	0	0	0	0	0	0	0	0	0	0	0	0	0	0
chr18	74961833	74962433	74961768	74961918	150	9	0	0						1														600	65	0	85		0	0	0	0	0	85	0	0	0	0	0	0	0	0	0	0	0
chr18	74961833	74962433	74961769	74961962	193	13	0	0						1														600	64	0	129		0	0	0	0	0	129	0	0	0	0	0	0	0	0	0	0	0
chr18	74961833	74962433	74961771	74961847	76	4	1	0.2	1																			600	62	0	14		14	0	0	0	0	0	0	0	0	0	0	0	0	0	0	0	0
chr18	74961833	74962433	74961771	74961848	77	5	0	0		1																		600	62	0	15		0	15	0	0	0	0	0	0	0	0	0	0	0	0	0	0	0
chr18	74961833	74962433	74961772	74961845	73	4	0	0	1																			600	61	0	12		12	0	0	0	0	0	0	0	0	0	0	0	0	0	0	0	0
chr18	74961833	74962433	74961772	74961847	75	5	0	0		1																		600	61	0	14		0	14	0	0	0	0	0	0	0	0	0	0	0	0	0	0	0
chr18	74961833	74962433	74961772	74961850	78	5	0	0		1																		600	61	0	17		0	17	0	0	0	0	0	0	0	0	0	0	0	0	0	0	0
chr18	74961833	74962433	74961772	74961857	85	5	0	0		1																		600	61	0	24		0	24	0	0	0	0	0	0	0	0	0	0	0	0	0	0	0
chr18	74961833	74962433	74961772	74961893	84	6	0	0		1																		600	61	0	23		0	23	0	0	0	0	0	0	0	0	0	0	0	0	0	0	0
chr18	74961833	74962433	74961772	74961905	133	8	0	0		1																		600	61	0	72		0	72	0	0	0	0	0	0	0	0	0	0	0	0	0	0	0
chr18	74961833	74962433	74961772	74962144	242	19	0	0	1																			600	61	0	181		181	0	0	0	0	0	0	0	0	0	0	0	0	0	0	0	0
chr18	74961833	74962433	74961773	74961932	159	10	0	0		1																		600	60	0	99		0	99	0	0	0	0	0	0	0	0	0	0	0	0	0	0	0
chr18	74961833	74962433	74961774	74961885	111	5	0	0	1																			600	59	0	52		52	0	0	0	0	0	0	0	0	0	0	0	0	0	0	0	0
chr18	74961833	74962433	74961774	74961895	121	6	0	0			1																	600	59	0	62		0	0	62	0	0	0	0	0	0	0	0	0	0	0	0	0	0
chr18	74961833	74962433	74961774	74961959	185	12	0	0	1																			600	59	0	126		126	0	0	0	0	0	0	0	0	0	0	0	0	0	0	0	0
chr18	74961833	74962433	74961776	74961895	119	6	0	0																		1		600	57	0	62		0	0	0	0	0	0	0	0	0	0	0	0	0	0	0	0	0
chr18	74961833	74962433	74961777	74961881	104	5	0	0		1																		600	56	0	48		0	48	0	0	0	0	0	0	0	0	0	0	0	0	0	0	0
chr18	74961833	74962433	74961778	74961929	151	9	0	0																			1	600	55	0	96		0	0	0	0	0	0	0	0	0	0	0	0	0	0	0	0	0
chr18	74961833	74962433	74961780	74961927	147	9	0	0															1					600	53	0	94		0	0	0	0	0	0	0	0	0	0	0	0	0	0	94	0	0
chr18	74961833	74962433	74961781	74961919	138	9	0	0						1														600	52	0	86		0	0	0	0	0	86	0	0	0	0	0	0	0	0	0	0	0
chr18	74961833	74962433	74961781	74961931	150	11	0	0						1														600	52	0	98		0	0	0	0	0	98	0	0	0	0	0	0	0	0	0	0	0
chr18	74961833	74962433	74961781	74961932	151	10	0	0														1						600	52	0	99		0	0	0	0	0	0	0	0	0	0	0	0	0	99	0	0	0
chr18	74961833	74962433	74961782	74961852	70	5	0	0							1													600	51	0	19		0	0	0	0	0	0	19	0	0	0	0	0	0	0	0	0	0
chr18	74961833	74962433	74961783	74961909	126	8	0	0										1										600	50	0	76		0	0	0	0	0	0	0	0	0	76	0	0	0	0	0	0	0
chr18	74961833	74962433	74961783	74961919	136	9	0	0				1																600	50	0	86		0	0	0	86	0	0	0	0	0	0	0	0	0	0	0	0	0
chr18	74961833	74962433	74961783	74962061	242	23	0	0					1															600	50	0	192		0	0	0	0	192	0	0	0	0	0	0	0	0	0	0	0	0
chr18	74961833	74962433	74961784	74961926	142	9	0	0										1										600	49	0	93		0	0	0	0	0	0	0	0	0	93	0	0	0	0	0	0	0
chr18	74961833	74962433	74961786	74961901	115	7	0	0						1														600	47	0	68		0	0	0	0	0	68	0	0	0	0	0	0	0	0	0	0	0
chr18	74961833	74962433	74961787	74961856	69	4	0	0						1														600	46	0	23		0	0	0	0	0	23	0	0	0	0	0	0	0	0	0	0	0
chr18	74961833	74962433	74961787	74961920	133	8	0	0												1								600	46	0	87		0	0	0	0	0	0	0	0	0	0	0	87	0	0	0	0	0
chr18	74961833	74962433	74961787	74961933	146	8	1	0.111111								1												600	46	0	100		0	0	0	0	0	0	0	100	0	0	0	0	0	0	0	0	0
chr18	74961833	74962433	74961788	74961889	101	5	0	0												1								600	45	0	56		0	0	0	0	0	0	0	0	0	0	0	56	0	0	0	0	0
chr18	74961833	74962433	74961788	74961936	148	9	0	0													1							600	45	0	103		0	0	0	0	0	0	0	0	0	0	0	0	103	0	0	0	0
chr18	74961833	74962433	74961789	74961924	135	7	0	0												1								600	44	0	91		0	0	0	0	0	0	0	0	0	0	0	91	0	0	0	0	0
chr18	74961833	74962433	74961790	74961954	164	9	0	0		1																		600	43	0	121		0	121	0	0	0	0	0	0	0	0	0	0	0	0	0	0	0
chr18	74961833	74962433	74961791	74961911	120	6	0	0		1																		600	42	0	78		0	78	0	0	0	0	0	0	0	0	0	0	0	0	0	0	0
chr18	74961833	74962433	74961792	74961887	95	4	0	0																		1		600	41	0	54		0	0	0	0	0	0	0	0	0	0	0	0	0	0	0	0	0
chr18	74961833	74962433	74961792	74961909	117	6	0	0		1																		600	41	0	76		0	76	0	0	0	0	0	0	0	0	0	0	0	0	0	0	0
chr18	74961833	74962433	74961792	74961911	119	6	0	0		1																		600	41	0	78		0	78	0	0	0	0	0	0	0	0	0	0	0	0	0	0	0
chr18	74961833	74962433	74961792	74961937	145	8	1	0.111111		1																		600	41	0	104		0	104	0	0	0	0	0	0	0	0	0	0	0	0	0	0	0
chr18	74961833	74962433	74961792	74961967	175	12	0	0		1																		600	41	0	134		0	134	0	0	0	0	0	0	0	0	0	0	0	0	0	0	0
chr18	74961833	74962433	74961793	74961880	87	3	0	0		1																		600	40	0	47		0	47	0	0	0	0	0	0	0	0	0	0	0	0	0	0	0
chr18	74961833	74962433	74961793	74961911	118	6	0	0		1																		600	40	0	78		0	78	0	0	0	0	0	0	0	0	0	0	0	0	0	0	0
chr18	74961833	74962433	74961793	74961925	132	7	0	0								1												600	40	0	92		0	0	0	0	0	0	0	92	0	0	0	0	0	0	0	0	0
chr18	74961833	74962433	74961793	74961959	166	10	0	0											1									600	40	0	126		0	0	0	0	0	0	0	0	0	0	126	0	0	0	0	0	0
chr18	74961833	74962433	74961794	74961921	127	7	0	0	1																			600	39	0	88		88	0	0	0	0	0	0	0	0	0	0	0	0	0	0	0	0
chr18	74961833	74962433	74961795	74961924	129	7	0	0									1											600	38	0	91		0	0	0	0	0	0	0	0	91	0	0	0	0	0	0	0	0
chr18	74961833	74962433	74961795	74961935	140	8	0	0						1														600	38	0	102		0	0	0	0	0	102	0	0	0	0	0	0	0	0	0	0	0
chr18	74961833	74962433	74961795	74961948	153	9	0	0								1												600	38	0	115		0	0	0	0	0	0	0	115	0	0	0	0	0	0	0	0	0
chr18	74961833	74962433	74961796	74961936	140	8	0	0						1														600	37	0	103		0	0	0	0	0	103	0	0	0	0	0	0	0	0	0	0	0
chr18	74961833	74962433	74961796	74961947	151	9	0	0																			1	600	37	0	114		0	0	0	0	0	0	0	0	0	0	0	0	0	0	0	0	0
chr18	74961833	74962433	74961796	74961956	160	9	0	0																	1			600	37	0	123		0	0	0	0	0	0	0	0	0	0	0	0	0	0	0	0	123
chr18	74961833	74962433	74961799	74961929	130	6	0	0			1																	600	34	0	96		0	0	96	0	0	0	0	0	0	0	0	0	0	0	0	0	0
chr18	74961833	74962433	74961799	74961936	137	7	1	0.125												1								600	34	0	103		0	0	0	0	0	0	0	0	0	0	0	103	0	0	0	0	0
chr18	74961833	74962433	74961800	74961944	144	8	0	0												1								600	33	0	111		0	0	0	0	0	0	0	0	0	0	0	111	0	0	0	0	0
chr18	74961833	74962433	74961800	74961967	167	10	1	0.0909091																		1		600	33	0	134		0	0	0	0	0	0	0	0	0	0	0	0	0	0	0	0	0
chr18	74961833	74962433	74961801	74961911	110	5	0	0		1																		600	32	0	78		0	78	0	0	0	0	0	0	0	0	0	0	0	0	0	0	0
chr18	74961833	74962433	74961801	74961945	144	8	0	0															1					600	32	0	112		0	0	0	0	0	0	0	0	0	0	0	0	0	0	112	0	0
chr18	74961833	74962433	74961801	74961982	181	14	0	0										1										600	32	0	149		0	0	0	0	0	0	0	0	0	149	0	0	0	0	0	0	0
chr18	74961833	74962433	74961802	74961949	147	8	0	0		1																		600	31	0	116		0	116	0	0	0	0	0	0	0	0	0	0	0	0	0	0	0
chr18	74961833	74962433	74961802	74961978	176	12	1	0.0769231						1														600	31	0	145		0	0	0	0	0	145	0	0	0	0	0	0	0	0	0	0	0
chr18	74961833	74962433	74961805	74961926	121	6	0	0															1					600	28	0	93		0	0	0	0	0	0	0	0	0	0	0	0	0	0	93	0	0
chr18	74961833	74962433	74961806	74961896	90	3	0	0														1						600	27	0	63		0	0	0	0	0	0	0	0	0	0	0	0	0	63	0	0	0
chr18	74961833	74962433	74961806	74961935	129	7	0	0															1					600	27	0	102		0	0	0	0	0	0	0	0	0	0	0	0	0	0	102	0	0
chr18	74961833	74962433	74961808	74961946	138	8	0	0								1												600	25	0	113		0	0	0	0	0	0	0	113	0	0	0	0	0	0	0	0	0
chr18	74961833	74962433	74961808	74961979	171	14	0	0								1												600	25	0	146		0	0	0	0	0	0	0	146	0	0	0	0	0	0	0	0	0
chr18	74961833	74962433	74961809	74961964	155	8	1	0.111111																		1		600	24	0	131		0	0	0	0	0	0	0	0	0	0	0	0	0	0	0	0	0
chr18	74961833	74962433	74961810	74961924	114	5	0	0												1								600	23	0	91		0	0	0	0	0	0	0	0	0	0	0	91	0	0	0	0	0
chr18	74961833	74962433	74961810	74961931	121	7	0	0		1								1										600	23	0	98		0	98	0	0	0	0	0	0	0	98	0	0	0	0	0	0	0
chr18	74961833	74962433	74961810	74961942	132	7	0	0														1						600	23	0	109		0	0	0	0	0	0	0	0	0	0	0	0	0	109	0	0	0
chr18	74961833	74962433	74961810	74961944	134	7	0	0									1											600	23	0	111		0	0	0	0	0	0	0	0	111	0	0	0	0	0	0	0	0
chr18	74961833	74962433	74961810	74961960	150	9	0	0									1											600	23	0	127		0	0	0	0	0	0	0	0	127	0	0	0	0	0	0	0	0
chr18	74961833	74962433	74961810	74961964	154	8	0	0											1									600	23	0	131		0	0	0	0	0	0	0	0	0	0	131	0	0	0	0	0	0
chr18	74961833	74962433	74961811	74961943	132	7	0	0														1						600	22	0	110		0	0	0	0	0	0	0	0	0	0	0	0	0	110	0	0	0
chr18	74961833	74962433	74961811	74961945	134	6	1	0.142857															1					600	22	0	112		0	0	0	0	0	0	0	0	0	0	0	0	0	0	112	0	0
chr18	74961833	74962433	74961811	74962005	194	14	0	0									1											600	22	0	172		0	0	0	0	0	0	0	0	172	0	0	0	0	0	0	0	0
chr18	74961833	74962433	74961812	74961932	120	6	0	0		1																		600	21	0	99		0	99	0	0	0	0	0	0	0	0	0	0	0	0	0	0	0
chr18	74961833	74962433	74961814	74961935	121	6	0	0											1									600	19	0	102		0	0	0	0	0	0	0	0	0	0	102	0	0	0	0	0	0
chr18	74961833	74962433	74961816	74961936	120	7	0	0		1																		600	17	0	103		0	103	0	0	0	0	0	0	0	0	0	0	0	0	0	0	0
chr18	74961833	74962433	74961818	74961939	121	7	0	0															1					600	15	0	106		0	0	0	0	0	0	0	0	0	0	0	0	0	0	106	0	0
chr18	74961833	74962433	74961819	74961940	121	7	0	0		1																		600	14	0	107		0	107	0	0	0	0	0	0	0	0	0	0	0	0	0	0	0
chr18	74961833	74962433	74961822	74961982	160	12	1	0.0769231				1																600	11	0	149		0	0	0	149	0	0	0	0	0	0	0	0	0	0	0	0	0
chr18	74961833	74962433	74961823	74961943	120	7	0	0					1															600	10	0	110		0	0	0	0	110	0	0	0	0	0	0	0	0	0	0	0	0
chr18	74961833	74962433	74961828	74961979	151	12	1	0.0769231												1								600	5	0	146		0	0	0	0	0	0	0	0	0	0	0	146	0	0	0	0	0
chr18	74961833	74962433	74961829	74961921	92	5	0	0														1						600	4	0	88		0	0	0	0	0	0	0	0	0	0	0	0	0	88	0	0	0
chr18	74961833	74962433	74961829	74961933	104	6	0	0		1																		600	4	0	100		0	100	0	0	0	0	0	0	0	0	0	0	0	0	0	0	0
chr18	74961833	74962433	74961831	74961900	69	3	0	0	1																			600	2	0	67		67	0	0	0	0	0	0	0	0	0	0	0	0	0	0	0	0
chr18	74961833	74962433	74961831	74961992	161	13	0	0								1												600	2	0	159		0	0	0	0	0	0	0	159	0	0	0	0	0	0	0	0	0
chr18	74961833	74962433	74961832	74961962	130	8	0	0													1							600	1	0	129		0	0	0	0	0	0	0	0	0	0	0	0	129	0	0	0	0
chr18	74961833	74962433	74961832	74961989	157	13	0	0											1									600	1	0	156		0	0	0	0	0	0	0	0	0	0	156	0	0	0	0	0	0
chr18	74961833	74962433	74961835	74962034	199	17	0	0	1																			600	0	0	199		199	0	0	0	0	0	0	0	0	0	0	0	0	0	0	0	0
chr18	74961833	74962433	74961836	74961911	75	4	0	0		1																		600	0	0	75		0	75	0	0	0	0	0	0	0	0	0	0	0	0	0	0	0
chr18	74961833	74962433	74961837	74961936	99	7	0	0		1																		600	0	0	99		0	99	0	0	0	0	0	0	0	0	0	0	0	0	0	0	0
chr18	74961833	74962433	74961837	74961958	121	7	0	0										1										600	0	0	121		0	0	0	0	0	0	0	0	0	121	0	0	0	0	0	0	0
chr18	74961833	74962433	74961838	74961943	105	7	0	0							1													600	0	0	105		0	0	0	0	0	0	105	0	0	0	0	0	0	0	0	0	0
chr18	74961833	74962433	74961839	74961977	138	12	0	0									1											600	0	0	138		0	0	0	0	0	0	0	0	138	0	0	0	0	0	0	0	0
chr18	74961833	74962433	74961841	74961971	130	11	0	0									1											600	0	0	130		0	0	0	0	0	0	0	0	130	0	0	0	0	0	0	0	0
chr18	74961833	74962433	74961841	74961978	137	13	0	0																	1			600	0	0	137		0	0	0	0	0	0	0	0	0	0	0	0	0	0	0	0	137
chr18	74961833	74962433	74961841	74961979	138	13	0	0			1																	600	0	0	138		0	0	138	0	0	0	0	0	0	0	0	0	0	0	0	0	0
chr18	74961833	74962433	74961842	74961959	117	7	1	0.125								1												600	0	0	117		0	0	0	0	0	0	0	117	0	0	0	0	0	0	0	0	0
chr18	74961833	74962433	74961842	74961973	131	11	0	0														1						600	0	0	131		0	0	0	0	0	0	0	0	0	0	0	0	0	131	0	0	0
chr18	74961833	74962433	74961845	74961966	121	9	0	0										1								1		600	0	0	121		0	0	0	0	0	0	0	0	0	121	0	0	0	0	0	0	0
chr18	74961833	74962433	74961846	74961948	102	6	0	0					1															600	0	0	102		0	0	0	0	102	0	0	0	0	0	0	0	0	0	0	0	0
chr18	74961833	74962433	74961846	74962009	163	10	3	0.230769			1																	600	0	0	163		0	0	163	0	0	0	0	0	0	0	0	0	0	0	0	0	0
chr18	74961833	74962433	74961848	74961969	121	8	1	0.111111							1													600	0	0	121		0	0	0	0	0	0	121	0	0	0	0	0	0	0	0	0	0
chr18	74961833	74962433	74961849	74961970	121	10	0	0						1														600	0	0	121		0	0	0	0	0	121	0	0	0	0	0	0	0	0	0	0	0
chr18	74961833	74962433	74961850	74961996	146	11	0	0						1														600	0	0	146		0	0	0	0	0	146	0	0	0	0	0	0	0	0	0	0	0
chr18	74961833	74962433	74961850	74962135	241	25	0	0					1															600	0	0	241		0	0	0	0	241	0	0	0	0	0	0	0	0	0	0	0	0
chr18	74961833	74962433	74961850	74962139	242	23	1	0.0416667												1								600	0	0	242		0	0	0	0	0	0	0	0	0	0	0	242	0	0	0	0	0
chr18	74961833	74962433	74961851	74961985	134	12	0	0			1																	600	0	0	134		0	0	134	0	0	0	0	0	0	0	0	0	0	0	0	0	0
chr18	74961833	74962433	74961851	74962040	189	17	0	0																1				600	0	0	189		0	0	0	0	0	0	0	0	0	0	0	0	0	0	0	189	0
chr18	74961833	74962433	74961851	74962122	240	23	0	0																		1		600	0	0	240		0	0	0	0	0	0	0	0	0	0	0	0	0	0	0	0	0
chr18	74961833	74962433	74961852	74961911	59	3	0	0	1																			600	0	0	59		59	0	0	0	0	0	0	0	0	0	0	0	0	0	0	0	0
chr18	74961833	74962433	74961858	74961991	133	12	0	0																1				600	0	0	133		0	0	0	0	0	0	0	0	0	0	0	0	0	0	0	133	0
chr18	74961833	74962433	74961858	74962079	221	22	0	0						1														600	0	0	221		0	0	0	0	0	221	0	0	0	0	0	0	0	0	0	0	0
chr18	74961833	74962433	74961860	74962062	202	21	0	0				1																600	0	0	202		0	0	0	202	0	0	0	0	0	0	0	0	0	0	0	0	0
chr18	74961833	74962433	74961861	74961967	106	9	0	0										1										600	0	0	106		0	0	0	0	0	0	0	0	0	106	0	0	0	0	0	0	0
chr18	74961833	74962433	74961861	74962262	242	25	0	0											1									600	0	0	242		0	0	0	0	0	0	0	0	0	0	242	0	0	0	0	0	0
chr18	74961833	74962433	74961864	74961954	90	5	1	0.166667	1																			600	0	0	90		90	0	0	0	0	0	0	0	0	0	0	0	0	0	0	0	0
chr18	74961833	74962433	74961864	74962065	201	21	0	0	1																			600	0	0	201		201	0	0	0	0	0	0	0	0	0	0	0	0	0	0	0	0
chr18	74961833	74962433	74961866	74962004	138	12	0	0		1																		600	0	0	138		0	138	0	0	0	0	0	0	0	0	0	0	0	0	0	0	0
chr18	74961833	74962433	74961866	74962007	141	13	0	0	1																			600	0	0	141		141	0	0	0	0	0	0	0	0	0	0	0	0	0	0	0	0
chr18	74961833	74962433	74961866	74962008	142	13	0	0		1																		600	0	0	142		0	142	0	0	0	0	0	0	0	0	0	0	0	0	0	0	0
chr18	74961833	74962433	74961866	74962031	165	15	0	0		1																		600	0	0	165		0	165	0	0	0	0	0	0	0	0	0	0	0	0	0	0	0
chr18	74961833	74962433	74961866	74962149	238	25	0	0		1																		600	0	0	238		0	238	0	0	0	0	0	0	0	0	0	0	0	0	0	0	0
chr18	74961833	74962433	74961867	74962004	137	13	0	0		1																		600	0	0	137		0	137	0	0	0	0	0	0	0	0	0	0	0	0	0	0	0
chr18	74961833	74962433	74961868	74961946	78	6	0	0		1																		600	0	0	78		0	78	0	0	0	0	0	0	0	0	0	0	0	0	0	0	0
chr18	74961833	74962433	74961869	74961990	121	12	0	0	1																			600	0	0	121		121	0	0	0	0	0	0	0	0	0	0	0	0	0	0	0	0
chr18	74961833	74962433	74961870	74961930	60	4	0	0		1																		600	0	0	60		0	60	0	0	0	0	0	0	0	0	0	0	0	0	0	0	0
chr18	74961833	74962433	74961870	74961933	63	5	0	0		1																		600	0	0	63		0	63	0	0	0	0	0	0	0	0	0	0	0	0	0	0	0
chr18	74961833	74962433	74961870	74961954	84	6	0	0		1																		600	0	0	84		0	84	0	0	0	0	0	0	0	0	0	0	0	0	0	0	0
chr18	74961833	74962433	74961870	74961990	120	12	0	0		1																		600	0	0	120		0	120	0	0	0	0	0	0	0	0	0	0	0	0	0	0	0
chr18	74961833	74962433	74961870	74962032	162	15	0	0		1																		600	0	0	162		0	162	0	0	0	0	0	0	0	0	0	0	0	0	0	0	0
chr18	74961833	74962433	74961870	74962070	200	20	0	0		1																		600	0	0	200		0	200	0	0	0	0	0	0	0	0	0	0	0	0	0	0	0
chr18	74961833	74962433	74961870	74962222	239	28	0	0		1																		600	0	0	239		0	239	0	0	0	0	0	0	0	0	0	0	0	0	0	0	0
chr18	74961833	74962433	74961871	74962106	235	22	1	0.0434783													1							600	0	0	235		0	0	0	0	0	0	0	0	0	0	0	0	235	0	0	0	0
chr18	74961833	74962433	74961871	74962130	239	26	0	0																1				600	0	0	239		0	0	0	0	0	0	0	0	0	0	0	0	0	0	0	239	0
chr18	74961833	74962433	74961872	74961966	94	8	0	0												1								600	0	0	94		0	0	0	0	0	0	0	0	0	0	0	94	0	0	0	0	0
chr18	74961833	74962433	74961872	74962160	239	26	0	0														1						600	0	0	239		0	0	0	0	0	0	0	0	0	0	0	0	0	239	0	0	0
chr18	74961833	74962433	74961872	74962223	238	26	2	0.0714286																		1		600	0	0	238		0	0	0	0	0	0	0	0	0	0	0	0	0	0	0	0	0
chr18	74961833	74962433	74961873	74962066	193	21	0	0		1																		600	0	0	193		0	193	0	0	0	0	0	0	0	0	0	0	0	0	0	0	0
chr18	74961833	74962433	74961874	74962014	140	13	0	0						1														600	0	0	140		0	0	0	0	0	140	0	0	0	0	0	0	0	0	0	0	0
chr18	74961833	74962433	74961874	74962173	242	24	0	0	1																			600	0	0	242		242	0	0	0	0	0	0	0	0	0	0	0	0	0	0	0	0
chr18	74961833	74962433	74961875	74962001	126	13	0	0										1										600	0	0	126		0	0	0	0	0	0	0	0	0	126	0	0	0	0	0	0	0
chr18	74961833	74962433	74961875	74962014	139	13	0	0																1				600	0	0	139		0	0	0	0	0	0	0	0	0	0	0	0	0	0	0	139	0
chr18	74961833	74962433	74961875	74962015	140	11	2	0.153846																	1			600	0	0	140		0	0	0	0	0	0	0	0	0	0	0	0	0	0	0	0	140
chr18	74961833	74962433	74961875	74962015	140	13	0	0										1					1					600	0	0	140		0	0	0	0	0	0	0	0	0	140	0	0	0	0	140	0	0
chr18	74961833	74962433	74961875	74962024	149	15	0	0				1																600	0	0	149		0	0	0	149	0	0	0	0	0	0	0	0	0	0	0	0	0
chr18	74961833	74962433	74961875	74962046	171	19	0	0						1														600	0	0	171		0	0	0	0	0	171	0	0	0	0	0	0	0	0	0	0	0
chr18	74961833	74962433	74961875	74962133	239	26	0	0													1							600	0	0	239		0	0	0	0	0	0	0	0	0	0	0	0	239	0	0	0	0
chr18	74961833	74962433	74961875	74962154	241	23	1	0.0416667														1						600	0	0	241		0	0	0	0	0	0	0	0	0	0	0	0	0	241	0	0	0
chr18	74961833	74962433	74961876	74961998	122	12	0	0									1											600	0	0	122		0	0	0	0	0	0	0	0	122	0	0	0	0	0	0	0	0
chr18	74961833	74962433	74961876	74962259	223	21	2	0.0869565											1									600	0	0	223		0	0	0	0	0	0	0	0	0	0	223	0	0	0	0	0	0
chr18	74961833	74962433	74961880	74961981	101	12	0	0			1																	600	0	0	101		0	0	101	0	0	0	0	0	0	0	0	0	0	0	0	0	0
chr18	74961833	74962433	74961880	74962001	133	12	0	0																1				600	0	0	133		0	0	0	0	0	0	0	0	0	0	0	0	0	0	0	133	0
chr18	74961833	74962433	74961881	74961964	83	7	0	0		1																		600	0	0	83		0	83	0	0	0	0	0	0	0	0	0	0	0	0	0	0	0
chr18	74961833	74962433	74961885	74962155	238	23	1	0.0416667												1								600	0	0	238		0	0	0	0	0	0	0	0	0	0	0	238	0	0	0	0	0
chr18	74961833	74962433	74961886	74961988	102	11	0	0														1						600	0	0	102		0	0	0	0	0	0	0	0	0	0	0	0	0	102	0	0	0
chr18	74961833	74962433	74961886	74962002	116	12	0	0																1				600	0	0	116		0	0	0	0	0	0	0	0	0	0	0	0	0	0	0	116	0
chr18	74961833	74962433	74961886	74962011	125	12	0	0									1											600	0	0	125		0	0	0	0	0	0	0	0	125	0	0	0	0	0	0	0	0
chr18	74961833	74962433	74961886	74962029	143	14	0	0			1																	600	0	0	143		0	0	143	0	0	0	0	0	0	0	0	0	0	0	0	0	0
chr18	74961833	74962433	74961886	74962032	146	12	3	0.2											1									600	0	0	146		0	0	0	0	0	0	0	0	0	0	146	0	0	0	0	0	0
chr18	74961833	74962433	74961886	74962060	174	19	0	0																1				600	0	0	174		0	0	0	0	0	0	0	0	0	0	0	0	0	0	0	174	0
chr18	74961833	74962433	74961887	74961934	47	4	0	0									1											600	0	0	47		0	0	0	0	0	0	0	0	47	0	0	0	0	0	0	0	0
chr18	74961833	74962433	74961887	74961960	73	6	0	0		1																		600	0	0	73		0	73	0	0	0	0	0	0	0	0	0	0	0	0	0	0	0
chr18	74961833	74962433	74961887	74962018	131	0	13	1									1											600	0	0	131		0	0	0	0	0	0	0	0	131	0	0	0	0	0	0	0	0
chr18	74961833	74962433	74961887	74962068	181	20	0	0							1													600	0	0	181		0	0	0	0	0	0	181	0	0	0	0	0	0	0	0	0	0
chr18	74961833	74962433	74961887	74962145	241	24	1	0.04															1					600	0	0	241		0	0	0	0	0	0	0	0	0	0	0	0	0	0	241	0	0
chr18	74961833	74962433	74961888	74962053	165	17	0	0											1									600	0	0	165		0	0	0	0	0	0	0	0	0	0	165	0	0	0	0	0	0
chr18	74961833	74962433	74961890	74962207	238	25	0	0							1													600	0	0	238		0	0	0	0	0	0	238	0	0	0	0	0	0	0	0	0	0
chr18	74961833	74962433	74961891	74962012	121	12	0	0													1							600	0	0	121		0	0	0	0	0	0	0	0	0	0	0	0	121	0	0	0	0
chr18	74961833	74962433	74961892	74962032	140	14	0	0											1									600	0	0	140		0	0	0	0	0	0	0	0	0	0	140	0	0	0	0	0	0
chr18	74961833	74962433	74961892	74962036	144	15	0	0														1						600	0	0	144		0	0	0	0	0	0	0	0	0	0	0	0	0	144	0	0	0
chr18	74961833	74962433	74961893	74962172	238	22	1	0.0434783								1												600	0	0	238		0	0	0	0	0	0	0	238	0	0	0	0	0	0	0	0	0
chr18	74961833	74962433	74961898	74961984	86	10	0	0										1										600	0	0	86		0	0	0	0	0	0	0	0	0	86	0	0	0	0	0	0	0
chr18	74961833	74962433	74961899	74961963	64	5	0	0	1																			600	0	0	64		64	0	0	0	0	0	0	0	0	0	0	0	0	0	0	0	0
chr18	74961833	74962433	74961899	74962035	136	12	2	0.142857								1												600	0	0	136		0	0	0	0	0	0	0	136	0	0	0	0	0	0	0	0	0
chr18	74961833	74962433	74961899	74962145	241	25	0	0		1																		600	0	0	241		0	241	0	0	0	0	0	0	0	0	0	0	0	0	0	0	0
chr18	74961833	74962433	74961901	74962017	116	10	0	0												1								600	0	0	116		0	0	0	0	0	0	0	0	0	0	0	116	0	0	0	0	0
chr18	74961833	74962433	74961902	74961937	35	3	0	0	1																			600	0	0	35		35	0	0	0	0	0	0	0	0	0	0	0	0	0	0	0	0
chr18	74961833	74962433	74961903	74961936	33	3	0	0		1																		600	0	0	33		0	33	0	0	0	0	0	0	0	0	0	0	0	0	0	0	0
chr18	74961833	74962433	74961903	74961940	37	2	0	0		1																		600	0	0	37		0	37	0	0	0	0	0	0	0	0	0	0	0	0	0	0	0
chr18	74961833	74962433	74961903	74962029	126	12	0	0								1												600	0	0	126		0	0	0	0	0	0	0	126	0	0	0	0	0	0	0	0	0
chr18	74961833	74962433	74961903	74962034	131	13	0	0		1																		600	0	0	131		0	131	0	0	0	0	0	0	0	0	0	0	0	0	0	0	0
chr18	74961833	74962433	74961903	74962094	191	20	0	0								1												600	0	0	191		0	0	0	0	0	0	0	191	0	0	0	0	0	0	0	0	0
chr18	74961833	74962433	74961904	74962100	196	20	0	0		1																		600	0	0	196		0	196	0	0	0	0	0	0	0	0	0	0	0	0	0	0	0
chr18	74961833	74962433	74961904	74962121	217	22	0	0	1																			600	0	0	217		217	0	0	0	0	0	0	0	0	0	0	0	0	0	0	0	0
chr18	74961833	74962433	74961905	74962012	107	10	0	0		1																		600	0	0	107		0	107	0	0	0	0	0	0	0	0	0	0	0	0	0	0	0
chr18	74961833	74962433	74961905	74962013	108	10	0	0		1																		600	0	0	108		0	108	0	0	0	0	0	0	0	0	0	0	0	0	0	0	0
chr18	74961833	74962433	74961905	74962035	130	11	2	0.153846		1																		600	0	0	130		0	130	0	0	0	0	0	0	0	0	0	0	0	0	0	0	0
chr18	74961833	74962433	74961905	74962065	160	18	0	0			1																	600	0	0	160		0	0	160	0	0	0	0	0	0	0	0	0	0	0	0	0	0
chr18	74961833	74962433	74961908	74962041	133	13	1	0.0714286												1								600	0	0	133		0	0	0	0	0	0	0	0	0	0	0	133	0	0	0	0	0
chr18	74961833	74962433	74961920	74962069	149	4	13	0.764706			1																	600	0	0	149		0	0	149	0	0	0	0	0	0	0	0	0	0	0	0	0	0
chr18	74961833	74962433	74961922	74962066	144	17	0	0							1													600	0	0	144		0	0	0	0	0	0	144	0	0	0	0	0	0	0	0	0	0
chr18	74961833	74962433	74961922	74962157	235	22	2	0.0833333																			1	600	0	0	235		0	0	0	0	0	0	0	0	0	0	0	0	0	0	0	0	0
chr18	74961833	74962433	74961922	74962207	241	27	0	0																		1		600	0	0	241		0	0	0	0	0	0	0	0	0	0	0	0	0	0	0	0	0
chr18	74961833	74962433	74961923	74962057	134	16	0	0														1						600	0	0	134		0	0	0	0	0	0	0	0	0	0	0	0	0	134	0	0	0
chr18	74961833	74962433	74961924	74962197	242	26	0	0								1												600	0	0	242		0	0	0	0	0	0	0	242	0	0	0	0	0	0	0	0	0
chr18	74961833	74962433	74961925	74962022	97	11	0	0		1																		600	0	0	97		0	97	0	0	0	0	0	0	0	0	0	0	0	0	0	0	0
chr18	74961833	74962433	74961925	74962079	154	18	0	0																	1			600	0	0	154		0	0	0	0	0	0	0	0	0	0	0	0	0	0	0	0	154
chr18	74961833	74962433	74961928	74962033	105	12	0	0	1																			600	0	0	105		105	0	0	0	0	0	0	0	0	0	0	0	0	0	0	0	0
chr18	74961833	74962433	74961929	74962083	154	18	0	0															1					600	0	0	154		0	0	0	0	0	0	0	0	0	0	0	0	0	0	154	0	0
chr18	74961833	74962433	74961931	74961967	36	4	0	0	1																			600	0	0	36		36	0	0	0	0	0	0	0	0	0	0	0	0	0	0	0	0
chr18	74961833	74962433	74961931	74962027	96	10	0	0	1																			600	0	0	96		96	0	0	0	0	0	0	0	0	0	0	0	0	0	0	0	0
chr18	74961833	74962433	74961932	74962255	227	25	2	0.0740741																		1		600	0	0	227		0	0	0	0	0	0	0	0	0	0	0	0	0	0	0	0	0
chr18	74961833	74962433	74961933	74962013	80	8	0	0		1																		600	0	0	80		0	80	0	0	0	0	0	0	0	0	0	0	0	0	0	0	0
chr18	74961833	74962433	74961933	74962037	104	11	0	0		1																		600	0	0	104		0	104	0	0	0	0	0	0	0	0	0	0	0	0	0	0	0
chr18	74961833	74962433	74961933	74962076	143	16	0	0																		1		600	0	0	143		0	0	0	0	0	0	0	0	0	0	0	0	0	0	0	0	0
chr18	74961833	74962433	74961933	74962127	194	21	1	0.0454545																1				600	0	0	194		0	0	0	0	0	0	0	0	0	0	0	0	0	0	0	194	0
chr18	74961833	74962433	74961937	74962115	178	19	1	0.05				1																600	0	0	178		0	0	0	178	0	0	0	0	0	0	0	0	0	0	0	0	0
chr18	74961833	74962433	74961938	74962072	134	15	0	0																	1			600	0	0	134		0	0	0	0	0	0	0	0	0	0	0	0	0	0	0	0	134
chr18	74961833	74962433	74961954	74962042	88	11	0	0																1				600	0	0	88		0	0	0	0	0	0	0	0	0	0	0	0	0	0	0	88	0
chr18	74961833	74962433	74961954	74962128	174	21	0	0																			1	600	0	0	174		0	0	0	0	0	0	0	0	0	0	0	0	0	0	0	0	0
chr18	74961833	74962433	74961958	74962212	240	28	0	0													1							600	0	0	240		0	0	0	0	0	0	0	0	0	0	0	0	240	0	0	0	0
chr18	74961833	74962433	74961959	74962118	159	19	0	0											1									600	0	0	159		0	0	0	0	0	0	0	0	0	0	159	0	0	0	0	0	0
chr18	74961833	74962433	74961960	74962121	161	18	1	0.0526316															1					600	0	0	161		0	0	0	0	0	0	0	0	0	0	0	0	0	0	161	0	0
chr18	74961833	74962433	74961961	74962080	119	15	0	0						1														600	0	0	119		0	0	0	0	0	119	0	0	0	0	0	0	0	0	0	0	0
chr18	74961833	74962433	74961961	74962134	173	21	0	0						1														600	0	0	173		0	0	0	0	0	173	0	0	0	0	0	0	0	0	0	0	0
chr18	74961833	74962433	74961962	74962107	145	16	0	0			1																	600	0	0	145		0	0	145	0	0	0	0	0	0	0	0	0	0	0	0	0	0
chr18	74961833	74962433	74961963	74962138	175	21	0	0																			1	600	0	0	175		0	0	0	0	0	0	0	0	0	0	0	0	0	0	0	0	0
chr18	74961833	74962433	74961963	74962189	226	25	0	0																	1			600	0	0	226		0	0	0	0	0	0	0	0	0	0	0	0	0	0	0	0	226
chr18	74961833	74962433	74961966	74962139	173	20	0	0													1							600	0	0	173		0	0	0	0	0	0	0	0	0	0	0	0	173	0	0	0	0
chr18	74961833	74962433	74961967	74962100	133	14	0	0	1																			600	0	0	133		133	0	0	0	0	0	0	0	0	0	0	0	0	0	0	0	0
chr18	74961833	74962433	74961967	74962112	145	16	0	0								1												600	0	0	145		0	0	0	0	0	0	0	145	0	0	0	0	0	0	0	0	0
chr18	74961833	74962433	74961970	74962132	162	17	0	0												1								600	0	0	162		0	0	0	0	0	0	0	0	0	0	0	162	0	0	0	0	0
chr18	74961833	74962433	74961970	74962133	163	16	0	0										1										600	0	0	163		0	0	0	0	0	0	0	0	0	163	0	0	0	0	0	0	0
chr18	74961833	74962433	74961970	74962158	188	19	0	0													1							600	0	0	188		0	0	0	0	0	0	0	0	0	0	0	0	188	0	0	0	0
chr18	74961833	74962433	74961970	74962313	241	23	2	0.08										1										600	0	0	241		0	0	0	0	0	0	0	0	0	241	0	0	0	0	0	0	0
chr18	74961833	74962433	74961971	74962085	114	11	1	0.0833333																	1			600	0	0	114		0	0	0	0	0	0	0	0	0	0	0	0	0	0	0	0	114
chr18	74961833	74962433	74961971	74962160	189	20	0	0																			1	600	0	0	189		0	0	0	0	0	0	0	0	0	0	0	0	0	0	0	0	0
chr18	74961833	74962433	74961972	74962106	134	13	0	0																			1	600	0	0	134		0	0	0	0	0	0	0	0	0	0	0	0	0	0	0	0	0
chr18	74961833	74962433	74961973	74962118	145	15	1	0.0625															1					600	0	0	145		0	0	0	0	0	0	0	0	0	0	0	0	0	0	145	0	0
chr18	74961833	74962433	74961976	74962035	59	5	0	0	1																			600	0	0	59		59	0	0	0	0	0	0	0	0	0	0	0	0	0	0	0	0
chr18	74961833	74962433	74961976	74962118	142	15	0	0						1														600	0	0	142		0	0	0	0	0	142	0	0	0	0	0	0	0	0	0	0	0
chr18	74961833	74962433	74961976	74962136	160	17	0	0													1							600	0	0	160		0	0	0	0	0	0	0	0	0	0	0	0	160	0	0	0	0
chr18	74961833	74962433	74961978	74962146	168	15	1	0.0625					1															600	0	0	168		0	0	0	0	168	0	0	0	0	0	0	0	0	0	0	0	0
chr18	74961833	74962433	74961979	74962115	136	14	0	0		1																		600	0	0	136		0	136	0	0	0	0	0	0	0	0	0	0	0	0	0	0	0
chr18	74961833	74962433	74961980	74962034	54	4	0	0	1																			600	0	0	54		54	0	0	0	0	0	0	0	0	0	0	0	0	0	0	0	0
chr18	74961833	74962433	74961980	74962121	141	14	0	0							1													600	0	0	141		0	0	0	0	0	0	141	0	0	0	0	0	0	0	0	0	0
chr18	74961833	74962433	74961980	74962123	143	14	0	0			1																	600	0	0	143		0	0	143	0	0	0	0	0	0	0	0	0	0	0	0	0	0
chr18	74961833	74962433	74961981	74962123	142	13	1	0.0714286																			1	600	0	0	142		0	0	0	0	0	0	0	0	0	0	0	0	0	0	0	0	0
chr18	74961833	74962433	74961982	74962109	127	12	0	0											1									600	0	0	127		0	0	0	0	0	0	0	0	0	0	127	0	0	0	0	0	0
chr18	74961833	74962433	74961982	74962133	151	15	0	0												1								600	0	0	151		0	0	0	0	0	0	0	0	0	0	0	151	0	0	0	0	0
chr18	74961833	74962433	74961982	74962211	229	24	0	0			1																	600	0	0	229		0	0	229	0	0	0	0	0	0	0	0	0	0	0	0	0	0
chr18	74961833	74962433	74961983	74962035	52	4	0	0	1																			600	0	0	52		52	0	0	0	0	0	0	0	0	0	0	0	0	0	0	0	0
chr18	74961833	74962433	74961983	74962142	159	13	3	0.1875													1							600	0	0	159		0	0	0	0	0	0	0	0	0	0	0	0	159	0	0	0	0
chr18	74961833	74962433	74961989	74962100	111	11	0	0		1																		600	0	0	111		0	111	0	0	0	0	0	0	0	0	0	0	0	0	0	0	0
chr18	74961833	74962433	74961989	74962115	126	14	0	0	1																			600	0	0	126		126	0	0	0	0	0	0	0	0	0	0	0	0	0	0	0	0
chr18	74961833	74962433	74961990	74962037	47	4	0	0	1																			600	0	0	47		47	0	0	0	0	0	0	0	0	0	0	0	0	0	0	0	0
chr18	74961833	74962433	74961990	74962135	145	9	7	0.4375																	1			600	0	0	145		0	0	0	0	0	0	0	0	0	0	0	0	0	0	0	0	145
chr18	74961833	74962433	74961991	74962117	126	13	1	0.0714286																1				600	0	0	126		0	0	0	0	0	0	0	0	0	0	0	0	0	0	0	126	0
chr18	74961833	74962433	74961992	74962151	159	16	0	0		1																		600	0	0	159		0	159	0	0	0	0	0	0	0	0	0	0	0	0	0	0	0
chr18	74961833	74962433	74961995	74962197	202	21	0	0				1																600	0	0	202		0	0	0	202	0	0	0	0	0	0	0	0	0	0	0	0	0
chr18	74961833	74962433	74962005	74962119	114	13	0	0		1																		600	0	0	114		0	114	0	0	0	0	0	0	0	0	0	0	0	0	0	0	0
chr18	74961833	74962433	74962005	74962148	143	15	0	0													1							600	0	0	143		0	0	0	0	0	0	0	0	0	0	0	0	143	0	0	0	0
chr18	74961833	74962433	74962006	74962325	237	25	0	0													1							600	0	0	237		0	0	0	0	0	0	0	0	0	0	0	0	237	0	0	0	0
chr18	74961833	74962433	74962007	74962145	138	15	0	0																		1		600	0	0	138		0	0	0	0	0	0	0	0	0	0	0	0	0	0	0	0	0
chr18	74961833	74962433	74962007	74962149	142	13	2	0.133333											1									600	0	0	142		0	0	0	0	0	0	0	0	0	0	142	0	0	0	0	0	0
chr18	74961833	74962433	74962007	74962151	144	15	0	0	1																			600	0	0	144		144	0	0	0	0	0	0	0	0	0	0	0	0	0	0	0	0
chr18	74961833	74962433	74962007	74962154	147	15	0	0													1							600	0	0	147		0	0	0	0	0	0	0	0	0	0	0	0	147	0	0	0	0
chr18	74961833	74962433	74962007	74962199	192	20	0	0		1																		600	0	0	192		0	192	0	0	0	0	0	0	0	0	0	0	0	0	0	0	0
chr18	74961833	74962433	74962008	74962152	144	15	0	0							1													600	0	0	144		0	0	0	0	0	0	144	0	0	0	0	0	0	0	0	0	0
chr18	74961833	74962433	74962008	74962185	177	19	0	0												1								600	0	0	177		0	0	0	0	0	0	0	0	0	0	0	177	0	0	0	0	0
chr18	74961833	74962433	74962009	74962159	150	16	0	0											1									600	0	0	150		0	0	0	0	0	0	0	0	0	0	150	0	0	0	0	0	0
chr18	74961833	74962433	74962010	74962114	104	13	0	0						1														600	0	0	104		0	0	0	0	0	104	0	0	0	0	0	0	0	0	0	0	0
chr18	74961833	74962433	74962010	74962146	136	14	1	0.0666667												1								600	0	0	136		0	0	0	0	0	0	0	0	0	0	0	136	0	0	0	0	0
chr18	74961833	74962433	74962012	74962100	88	10	0	0	1																			600	0	0	88		88	0	0	0	0	0	0	0	0	0	0	0	0	0	0	0	0
chr18	74961833	74962433	74962012	74962121	109	13	0	0																		1		600	0	0	109		0	0	0	0	0	0	0	0	0	0	0	0	0	0	0	0	0
chr18	74961833	74962433	74962013	74962105	92	9	1	0.1																			1	600	0	0	92		0	0	0	0	0	0	0	0	0	0	0	0	0	0	0	0	0
chr18	74961833	74962433	74962014	74962151	137	13	2	0.133333								1												600	0	0	137		0	0	0	0	0	0	0	137	0	0	0	0	0	0	0	0	0
chr18	74961833	74962433	74962016	74962142	126	15	0	0															1					600	0	0	126		0	0	0	0	0	0	0	0	0	0	0	0	0	0	126	0	0
chr18	74961833	74962433	74962016	74962178	162	19	0	0														1						600	0	0	162		0	0	0	0	0	0	0	0	0	0	0	0	0	162	0	0	0
chr18	74961833	74962433	74962018	74962145	127	13	1	0.0714286									1											600	0	0	127		0	0	0	0	0	0	0	0	127	0	0	0	0	0	0	0	0
chr18	74961833	74962433	74962022	74962160	138	15	0	0											1									600	0	0	138		0	0	0	0	0	0	0	0	0	0	138	0	0	0	0	0	0
chr18	74961833	74962433	74962025	74962134	109	13	0	0														1						600	0	0	109		0	0	0	0	0	0	0	0	0	0	0	0	0	109	0	0	0
chr18	74961833	74962433	74962029	74962100	71	8	0	0	1																			600	0	0	71		71	0	0	0	0	0	0	0	0	0	0	0	0	0	0	0	0
chr18	74961833	74962433	74962031	74962100	69	8	0	0		1																		600	0	0	69		0	69	0	0	0	0	0	0	0	0	0	0	0	0	0	0	0
chr18	74961833	74962433	74962031	74962147	116	12	1	0.0769231																		1		600	0	0	116		0	0	0	0	0	0	0	0	0	0	0	0	0	0	0	0	0
chr18	74961833	74962433	74962031	74962173	142	16	1	0.0588235																		1		600	0	0	142		0	0	0	0	0	0	0	0	0	0	0	0	0	0	0	0	0
chr18	74961833	74962433	74962031	74962175	144	17	0	0						1														600	0	0	144		0	0	0	0	0	144	0	0	0	0	0	0	0	0	0	0	0
chr18	74961833	74962433	74962035	74962115	80	10	0	0	1																			600	0	0	80		80	0	0	0	0	0	0	0	0	0	0	0	0	0	0	0	0
chr18	74961833	74962433	74962037	74962100	63	7	0	0		1																		600	0	0	63		0	63	0	0	0	0	0	0	0	0	0	0	0	0	0	0	0
chr18	74961833	74962433	74962037	74962151	114	12	0	0		1																		600	0	0	114		0	114	0	0	0	0	0	0	0	0	0	0	0	0	0	0	0
chr18	74961833	74962433	74962037	74962348	242	22	0	0									1											600	0	0	242		0	0	0	0	0	0	0	0	242	0	0	0	0	0	0	0	0
chr18	74961833	74962433	74962038	74962100	62	7	0	0		1																		600	0	0	62		0	62	0	0	0	0	0	0	0	0	0	0	0	0	0	0	0
chr18	74961833	74962433	74962038	74962151	113	12	0	0		1																		600	0	0	113		0	113	0	0	0	0	0	0	0	0	0	0	0	0	0	0	0
chr18	74961833	74962433	74962039	74962116	77	10	0	0										1										600	0	0	77		0	0	0	0	0	0	0	0	0	77	0	0	0	0	0	0	0
chr18	74961833	74962433	74962040	74962100	60	6	0	0		1																		600	0	0	60		0	60	0	0	0	0	0	0	0	0	0	0	0	0	0	0	0
chr18	74961833	74962433	74962041	74962100	59	6	0	0	1																			600	0	0	59		59	0	0	0	0	0	0	0	0	0	0	0	0	0	0	0	0
chr18	74961833	74962433	74962041	74962303	242	24	1	0.04																1				600	0	0	242		0	0	0	0	0	0	0	0	0	0	0	0	0	0	0	242	0
chr18	74961833	74962433	74962044	74962234	190	21	0	0													1							600	0	0	190		0	0	0	0	0	0	0	0	0	0	0	0	190	0	0	0	0
chr18	74961833	74962433	74962045	74962111	66	6	0	0	1																			600	0	0	66		66	0	0	0	0	0	0	0	0	0	0	0	0	0	0	0	0
chr18	74961833	74962433	74962047	74962179	132	13	0	0							1													600	0	0	132		0	0	0	0	0	0	132	0	0	0	0	0	0	0	0	0	0
chr18	74961833	74962433	74962047	74962186	139	13	0	0														1						600	0	0	139		0	0	0	0	0	0	0	0	0	0	0	0	0	139	0	0	0
chr18	74961833	74962433	74962047	74962202	155	16	0	0		1																		600	0	0	155		0	155	0	0	0	0	0	0	0	0	0	0	0	0	0	0	0
chr18	74961833	74962433	74962049	74962161	112	11	0	0															1					600	0	0	112		0	0	0	0	0	0	0	0	0	0	0	0	0	0	112	0	0
chr18	74961833	74962433	74962053	74962121	68	7	0	0				1																600	0	0	68		0	0	0	68	0	0	0	0	0	0	0	0	0	0	0	0	0
chr18	74961833	74962433	74962056	74962100	44	3	0	0	1																			600	0	0	44		44	0	0	0	0	0	0	0	0	0	0	0	0	0	0	0	0
chr18	74961833	74962433	74962056	74962151	95	8	0	0	1																			600	0	0	95		95	0	0	0	0	0	0	0	0	0	0	0	0	0	0	0	0
chr18	74961833	74962433	74962057	74962150	93	8	0	0		1																		600	0	0	93		0	93	0	0	0	0	0	0	0	0	0	0	0	0	0	0	0
chr18	74961833	74962433	74962058	74962204	146	15	0	0							1													600	0	0	146		0	0	0	0	0	0	146	0	0	0	0	0	0	0	0	0	0
chr18	74961833	74962433	74962058	74962243	185	19	0	0														1						600	0	0	185		0	0	0	0	0	0	0	0	0	0	0	0	0	185	0	0	0
chr18	74961833	74962433	74962059	74962196	137	13	0	0							1													600	0	0	137		0	0	0	0	0	0	137	0	0	0	0	0	0	0	0	0	0
chr18	74961833	74962433	74962065	74962206	141	14	0	0								1												600	0	0	141		0	0	0	0	0	0	0	141	0	0	0	0	0	0	0	0	0
chr18	74961833	74962433	74962066	74962295	229	22	1	0.0434783																		1		600	0	0	229		0	0	0	0	0	0	0	0	0	0	0	0	0	0	0	0	0
chr18	74961833	74962433	74962072	74962334	240	21	0	0							1													600	0	0	240		0	0	0	0	0	0	240	0	0	0	0	0	0	0	0	0	0
chr18	74961833	74962433	74962074	74962210	136	15	0	0											1									600	0	0	136		0	0	0	0	0	0	0	0	0	0	136	0	0	0	0	0	0
chr18	74961833	74962433	74962077	74962395	239	24	0	0										1										600	0	0	239		0	0	0	0	0	0	0	0	0	239	0	0	0	0	0	0	0
chr18	74961833	74962433	74962081	74962220	139	16	0	0														1						600	0	0	139		0	0	0	0	0	0	0	0	0	0	0	0	0	139	0	0	0
chr18	74961833	74962433	74962081	74962225	144	17	0	0							1													600	0	0	144		0	0	0	0	0	0	144	0	0	0	0	0	0	0	0	0	0
chr18	74961833	74962433	74962082	74962212	130	14	1	0.0666667															1					600	0	0	130		0	0	0	0	0	0	0	0	0	0	0	0	0	0	130	0	0
chr18	74961833	74962433	74962084	74962250	166	18	0	0																	1			600	0	0	166		0	0	0	0	0	0	0	0	0	0	0	0	0	0	0	0	166
chr18	74961833	74962433	74962089	74962219	130	16	0	0																		1		600	0	0	130		0	0	0	0	0	0	0	0	0	0	0	0	0	0	0	0	0
chr18	74961833	74962433	74962090	74962223	133	14	2	0.125															1					600	0	0	133		0	0	0	0	0	0	0	0	0	0	0	0	0	0	133	0	0
chr18	74961833	74962433	74962092	74962193	101	8	1	0.111111														1						600	0	0	101		0	0	0	0	0	0	0	0	0	0	0	0	0	101	0	0	0
chr18	74961833	74962433	74962093	74962244	151	13	2	0.133333			1																	600	0	0	151		0	0	151	0	0	0	0	0	0	0	0	0	0	0	0	0	0
chr18	74961833	74962433	74962094	74962195	101	10	0	0	1																			600	0	0	101		101	0	0	0	0	0	0	0	0	0	0	0	0	0	0	0	0
chr18	74961833	74962433	74962094	74962228	134	16	0	0							1													600	0	0	134		0	0	0	0	0	0	134	0	0	0	0	0	0	0	0	0	0
chr18	74961833	74962433	74962094	74962391	241	25	0	0													1							600	0	0	241		0	0	0	0	0	0	0	0	0	0	0	0	241	0	0	0	0
chr18	74961833	74962433	74962095	74962198	103	10	0	0		1																		600	0	0	103		0	103	0	0	0	0	0	0	0	0	0	0	0	0	0	0	0
chr18	74961833	74962433	74962096	74962151	55	5	0	0	1																			600	0	0	55		55	0	0	0	0	0	0	0	0	0	0	0	0	0	0	0	0
chr18	74961833	74962433	74962103	74962245	142	17	0	0																1				600	0	0	142		0	0	0	0	0	0	0	0	0	0	0	0	0	0	0	142	0
chr18	74961833	74962433	74962105	74962189	84	8	0	0		1																		600	0	0	84		0	84	0	0	0	0	0	0	0	0	0	0	0	0	0	0	0
chr18	74961833	74962433	74962105	74962223	118	15	0	0		1																		600	0	0	118		0	118	0	0	0	0	0	0	0	0	0	0	0	0	0	0	0
chr18	74961833	74962433	74962106	74962182	76	9	0	0		1																		600	0	0	76		0	76	0	0	0	0	0	0	0	0	0	0	0	0	0	0	0
chr18	74961833	74962433	74962106	74962243	137	16	0	0											1									600	0	0	137		0	0	0	0	0	0	0	0	0	0	137	0	0	0	0	0	0
chr18	74961833	74962433	74962110	74962256	146	16	0	0																	1			600	0	0	146		0	0	0	0	0	0	0	0	0	0	0	0	0	0	0	0	146
chr18	74961833	74962433	74962111	74962198	87	8	0	0	1																			600	0	0	87		87	0	0	0	0	0	0	0	0	0	0	0	0	0	0	0	0
chr18	74961833	74962433	74962111	74962265	154	16	1	0.0588235									1											600	0	0	154		0	0	0	0	0	0	0	0	154	0	0	0	0	0	0	0	0
chr18	74961833	74962433	74962114	74962244	130	12	1	0.0769231														1						600	0	0	130		0	0	0	0	0	0	0	0	0	0	0	0	0	130	0	0	0
chr18	74961833	74962433	74962114	74962287	173	17	0	0												1								600	0	0	173		0	0	0	0	0	0	0	0	0	0	0	173	0	0	0	0	0
chr18	74961833	74962433	74962119	74962271	152	14	2	0.125					1															600	0	0	152		0	0	0	0	152	0	0	0	0	0	0	0	0	0	0	0	0
chr18	74961833	74962433	74962123	74962356	233	24	0	0						1														600	0	0	233		0	0	0	0	0	233	0	0	0	0	0	0	0	0	0	0	0
chr18	74961833	74962433	74962124	74962195	71	6	1	0.142857		1																		600	0	0	71		0	71	0	0	0	0	0	0	0	0	0	0	0	0	0	0	0
chr18	74961833	74962433	74962124	74962423	217	25	1	0.0384615																			1	600	0	0	217		0	0	0	0	0	0	0	0	0	0	0	0	0	0	0	0	0
chr18	74961833	74962433	74962126	74962271	145	14	1	0.0666667															1					600	0	0	145		0	0	0	0	0	0	0	0	0	0	0	0	0	0	145	0	0
chr18	74961833	74962433	74962126	74962276	150	14	0	0						1														600	0	0	150		0	0	0	0	0	150	0	0	0	0	0	0	0	0	0	0	0
chr18	74961833	74962433	74962127	74962289	162	17	0	0												1								600	0	0	162		0	0	0	0	0	0	0	0	0	0	0	162	0	0	0	0	0
chr18	74961833	74962433	74962127	74962295	168	17	0	0																1				600	0	0	168		0	0	0	0	0	0	0	0	0	0	0	0	0	0	0	168	0
chr18	74961833	74962433	74962136	74962289	153	15	0	0											1									600	0	0	153		0	0	0	0	0	0	0	0	0	0	153	0	0	0	0	0	0
chr18	74961833	74962433	74962137	74962202	65	7	0	0		1																		600	0	0	65		0	65	0	0	0	0	0	0	0	0	0	0	0	0	0	0	0
chr18	74961833	74962433	74962137	74962284	147	13	2	0.133333																1				600	0	0	147		0	0	0	0	0	0	0	0	0	0	0	0	0	0	0	147	0
chr18	74961833	74962433	74962137	74962318	181	18	0	0						1														600	0	0	181		0	0	0	0	0	181	0	0	0	0	0	0	0	0	0	0	0
chr18	74961833	74962433	74962138	74962198	60	5	0	0		1																		600	0	0	60		0	60	0	0	0	0	0	0	0	0	0	0	0	0	0	0	0
chr18	74961833	74962433	74962139	74962188	49	4	0	0		1																		600	0	0	49		0	49	0	0	0	0	0	0	0	0	0	0	0	0	0	0	0
chr18	74961833	74962433	74962139	74962196	57	5	0	0		1																		600	0	0	57		0	57	0	0	0	0	0	0	0	0	0	0	0	0	0	0	0
chr18	74961833	74962433	74962141	74962201	60	5	1	0.166667		1																		600	0	0	60		0	60	0	0	0	0	0	0	0	0	0	0	0	0	0	0	0
chr18	74961833	74962433	74962141	74962351	210	21	0	0						1														600	0	0	210		0	0	0	0	0	210	0	0	0	0	0	0	0	0	0	0	0
chr18	74961833	74962433	74962142	74962297	155	16	0	0																	1			600	0	0	155		0	0	0	0	0	0	0	0	0	0	0	0	0	0	0	0	155
chr18	74961833	74962433	74962144	74962366	222	23	0	0	1																			600	0	0	222		222	0	0	0	0	0	0	0	0	0	0	0	0	0	0	0	0
chr18	74961833	74962433	74962145	74962202	57	7	0	0		1																		600	0	0	57		0	57	0	0	0	0	0	0	0	0	0	0	0	0	0	0	0
chr18	74961833	74962433	74962149	74962271	122	11	3	0.214286							1													600	0	0	122		0	0	0	0	0	0	122	0	0	0	0	0	0	0	0	0	0
chr18	74961833	74962433	74962152	74962266	114	14	0	0												1								600	0	0	114		0	0	0	0	0	0	0	0	0	0	0	114	0	0	0	0	0
chr18	74961833	74962433	74962153	74962291	138	16	0	0																	1			600	0	0	138		0	0	0	0	0	0	0	0	0	0	0	0	0	0	0	0	138
chr18	74961833	74962433	74962154	74962264	110	14	0	0							1													600	0	0	110		0	0	0	0	0	0	110	0	0	0	0	0	0	0	0	0	0
chr18	74961833	74962433	74962155	74962330	175	18	1	0.0526316																1				600	0	0	175		0	0	0	0	0	0	0	0	0	0	0	0	0	0	0	175	0
chr18	74961833	74962433	74962155	74962330	175	19	0	0																			1	600	0	0	175		0	0	0	0	0	0	0	0	0	0	0	0	0	0	0	0	0
chr18	74961833	74962433	74962156	74962291	135	15	1	0.0625						1														600	0	0	135		0	0	0	0	0	135	0	0	0	0	0	0	0	0	0	0	0
chr18	74961833	74962433	74962156	74962312	156	16	0	0													1							600	0	0	156		0	0	0	0	0	0	0	0	0	0	0	0	156	0	0	0	0
chr18	74961833	74962433	74962162	74962345	183	18	0	0						1														600	0	0	183		0	0	0	0	0	183	0	0	0	0	0	0	0	0	0	0	0
chr18	74961833	74962433	74962163	74962299	136	14	0	0							1													600	0	0	136		0	0	0	0	0	0	136	0	0	0	0	0	0	0	0	0	0
chr18	74961833	74962433	74962164	74962314	150	15	0	0								1												600	0	0	150		0	0	0	0	0	0	0	150	0	0	0	0	0	0	0	0	0
chr18	74961833	74962433	74962164	74962368	204	22	0	0							1													600	0	0	204		0	0	0	0	0	0	204	0	0	0	0	0	0	0	0	0	0
chr18	74961833	74962433	74962165	74962308	143	13	1	0.0714286															1					600	0	0	143		0	0	0	0	0	0	0	0	0	0	0	0	0	0	143	0	0
chr18	74961833	74962433	74962165	74962319	154	16	0	0												1								600	0	0	154		0	0	0	0	0	0	0	0	0	0	0	154	0	0	0	0	0
chr18	74961833	74962433	74962166	74962313	147	14	0	0				1																600	0	0	147		0	0	0	147	0	0	0	0	0	0	0	0	0	0	0	0	0
chr18	74961833	74962433	74962170	74962261	91	11	0	0								1												600	0	0	91		0	0	0	0	0	0	0	91	0	0	0	0	0	0	0	0	0
chr18	74961833	74962433	74962170	74962303	133	13	0	0		1																		600	0	0	133		0	133	0	0	0	0	0	0	0	0	0	0	0	0	0	0	0
chr18	74961833	74962433	74962170	74962305	135	13	0	0		1																		600	0	0	135		0	135	0	0	0	0	0	0	0	0	0	0	0	0	0	0	0
chr18	74961833	74962433	74962170	74962326	156	16	0	0	1																			600	0	0	156		156	0	0	0	0	0	0	0	0	0	0	0	0	0	0	0	0
chr18	74961833	74962433	74962171	74962280	109	12	0	0		1																		600	0	0	109		0	109	0	0	0	0	0	0	0	0	0	0	0	0	0	0	0
chr18	74961833	74962433	74962171	74962281	110	12	0	0	1																			600	0	0	110		110	0	0	0	0	0	0	0	0	0	0	0	0	0	0	0	0
chr18	74961833	74962433	74962171	74962309	138	11	1	0.0833333		1																		600	0	0	138		0	138	0	0	0	0	0	0	0	0	0	0	0	0	0	0	0
chr18	74961833	74962433	74962171	74962309	138	12	0	0			1																	600	0	0	138		0	0	138	0	0	0	0	0	0	0	0	0	0	0	0	0	0
chr18	74961833	74962433	74962171	74962320	149	15	0	0		1																		600	0	0	149		0	149	0	0	0	0	0	0	0	0	0	0	0	0	0	0	0
chr18	74961833	74962433	74962171	74962366	195	20	0	0	1																			600	0	0	195		195	0	0	0	0	0	0	0	0	0	0	0	0	0	0	0	0
chr18	74961833	74962433	74962171	74962407	236	24	0	0	1																			600	0	0	236		236	0	0	0	0	0	0	0	0	0	0	0	0	0	0	0	0
chr18	74961833	74962433	74962172	74962257	85	10	0	0		1																		600	0	0	85		0	85	0	0	0	0	0	0	0	0	0	0	0	0	0	0	0
chr18	74961833	74962433	74962172	74962304	132	12	1	0.0769231															1					600	0	0	132		0	0	0	0	0	0	0	0	0	0	0	0	0	0	132	0	0
chr18	74961833	74962433	74962172	74962321	149	15	0	0													1							600	0	0	149		0	0	0	0	0	0	0	0	0	0	0	0	149	0	0	0	0
chr18	74961833	74962433	74962172	74962366	194	20	0	0		1																		600	0	0	194		0	194	0	0	0	0	0	0	0	0	0	0	0	0	0	0	0
chr18	74961833	74962433	74962173	74962347	174	18	0	0													1							600	0	0	174		0	0	0	0	0	0	0	0	0	0	0	0	174	0	0	0	0
chr18	74961833	74962433	74962174	74962318	144	13	0	0				1																600	0	0	144		0	0	0	144	0	0	0	0	0	0	0	0	0	0	0	0	0
chr18	74961833	74962433	74962174	74962333	159	14	0	0									1											600	0	0	159		0	0	0	0	0	0	0	0	159	0	0	0	0	0	0	0	0
chr18	74961833	74962433	74962175	74962317	142	13	0	0				1																600	0	0	142		0	0	0	142	0	0	0	0	0	0	0	0	0	0	0	0	0
chr18	74961833	74962433	74962176	74962319	143	14	0	0			1																	600	0	0	143		0	0	143	0	0	0	0	0	0	0	0	0	0	0	0	0	0
chr18	74961833	74962433	74962177	74962347	170	16	1	0.0588235																1				600	0	0	170		0	0	0	0	0	0	0	0	0	0	0	0	0	0	0	170	0
chr18	74961833	74962433	74962178	74962367	189	19	0	0	1																			600	0	0	189		189	0	0	0	0	0	0	0	0	0	0	0	0	0	0	0	0
chr18	74961833	74962433	74962179	74962265	86	10	0	0		1																		600	0	0	86		0	86	0	0	0	0	0	0	0	0	0	0	0	0	0	0	0
chr18	74961833	74962433	74962179	74962281	102	11	0	0		1																		600	0	0	102		0	102	0	0	0	0	0	0	0	0	0	0	0	0	0	0	0
chr18	74961833	74962433	74962179	74962289	110	10	1	0.0909091		1																		600	0	0	110		0	110	0	0	0	0	0	0	0	0	0	0	0	0	0	0	0
chr18	74961833	74962433	74962179	74962299	120	11	1	0.0833333													1							600	0	0	120		0	0	0	0	0	0	0	0	0	0	0	0	120	0	0	0	0
chr18	74961833	74962433	74962179	74962333	154	15	0	0	1																			600	0	0	154		154	0	0	0	0	0	0	0	0	0	0	0	0	0	0	0	0
chr18	74961833	74962433	74962179	74962339	160	15	0	0		1																		600	0	0	160		0	160	0	0	0	0	0	0	0	0	0	0	0	0	0	0	0
chr18	74961833	74962433	74962179	74962366	187	19	0	0	1																			600	0	0	187		187	0	0	0	0	0	0	0	0	0	0	0	0	0	0	0	0
chr18	74961833	74962433	74962181	74962305	124	11	1	0.0833333		1																		600	0	0	124		0	124	0	0	0	0	0	0	0	0	0	0	0	0	0	0	0
chr18	74961833	74962433	74962183	74962366	183	19	0	0	1																			600	0	0	183		183	0	0	0	0	0	0	0	0	0	0	0	0	0	0	0	0
chr18	74961833	74962433	74962184	74962361	177	18	1	0.0526316							1													600	0	0	177		0	0	0	0	0	0	177	0	0	0	0	0	0	0	0	0	0
chr18	74961833	74962433	74962184	74962402	218	22	1	0.0434783		1																		600	0	0	218		0	218	0	0	0	0	0	0	0	0	0	0	0	0	0	0	0
chr18	74961833	74962433	74962185	74962329	144	15	0	0							1													600	0	0	144		0	0	0	0	0	0	144	0	0	0	0	0	0	0	0	0	0
chr18	74961833	74962433	74962188	74962331	143	14	1	0.0666667					1															600	0	0	143		0	0	0	0	143	0	0	0	0	0	0	0	0	0	0	0	0
chr18	74961833	74962433	74962203	74962413	210	21	0	0											1									600	0	0	210		0	0	0	0	0	0	0	0	0	0	210	0	0	0	0	0	0
chr18	74961833	74962433	74962204	74962437	233	23	0	0	1																			600	0	4	229		229	0	0	0	0	0	0	0	0	0	0	0	0	0	0	0	0
chr18	74961833	74962433	74962206	74962280	74	8	0	0		1																		600	0	0	74		0	74	0	0	0	0	0	0	0	0	0	0	0	0	0	0	0
chr18	74961833	74962433	74962207	74962239	32	4	0	0		1																		600	0	0	32		0	32	0	0	0	0	0	0	0	0	0	0	0	0	0	0	0
chr18	74961833	74962433	74962207	74962249	42	5	0	0		1																		600	0	0	42		0	42	0	0	0	0	0	0	0	0	0	0	0	0	0	0	0
chr18	74961833	74962433	74962207	74962317	110	11	0	0		1																		600	0	0	110		0	110	0	0	0	0	0	0	0	0	0	0	0	0	0	0	0
chr18	74961833	74962433	74962207	74962326	119	11	0	0		1																		600	0	0	119		0	119	0	0	0	0	0	0	0	0	0	0	0	0	0	0	0
chr18	74961833	74962433	74962207	74962348	141	13	1	0.0714286	1																			600	0	0	141		141	0	0	0	0	0	0	0	0	0	0	0	0	0	0	0	0
chr18	74961833	74962433	74962207	74962366	159	15	0	0		1																		600	0	0	159		0	159	0	0	0	0	0	0	0	0	0	0	0	0	0	0	0
chr18	74961833	74962433	74962207	74962415	208	20	1	0.047619		1																		600	0	0	208		0	208	0	0	0	0	0	0	0	0	0	0	0	0	0	0	0
chr18	74961833	74962433	74962207	74962437	230	22	0	0	1																			600	0	4	226		226	0	0	0	0	0	0	0	0	0	0	0	0	0	0	0	0
chr18	74961833	74962433	74962208	74962305	97	8	0	0	1																			600	0	0	97		97	0	0	0	0	0	0	0	0	0	0	0	0	0	0	0	0
chr18	74961833	74962433	74962208	74962366	158	15	0	0		1																		600	0	0	158		0	158	0	0	0	0	0	0	0	0	0	0	0	0	0	0	0
chr18	74961833	74962433	74962209	74962333	124	11	0	0																1				600	0	0	124		0	0	0	0	0	0	0	0	0	0	0	0	0	0	0	124	0
chr18	74961833	74962433	74962209	74962361	152	12	1	0.0769231		1																		600	0	0	152		0	152	0	0	0	0	0	0	0	0	0	0	0	0	0	0	0
chr18	74961833	74962433	74962210	74962342	132	11	1	0.0833333														1						600	0	0	132		0	0	0	0	0	0	0	0	0	0	0	0	0	132	0	0	0
chr18	74961833	74962433	74962210	74962345	135	12	0	0															1					600	0	0	135		0	0	0	0	0	0	0	0	0	0	0	0	0	0	135	0	0
chr18	74961833	74962433	74962211	74962370	159	16	0	0																		1		600	0	0	159		0	0	0	0	0	0	0	0	0	0	0	0	0	0	0	0	0
chr18	74961833	74962433	74962213	74962367	154	14	0	0				1																600	0	0	154		0	0	0	154	0	0	0	0	0	0	0	0	0	0	0	0	0
chr18	74961833	74962433	74962218	74962359	141	12	0	0		1																		600	0	0	141		0	141	0	0	0	0	0	0	0	0	0	0	0	0	0	0	0
chr18	74961833	74962433	74962220	74962366	146	13	0	0		1																		600	0	0	146		0	146	0	0	0	0	0	0	0	0	0	0	0	0	0	0	0
chr18	74961833	74962433	74962221	74962335	155	16	0	0																	1			600	0	0	155		0	0	0	0	0	0	0	0	0	0	0	0	0	0	0	0	155
chr18	74961833	74962433	74962226	74962388	162	15	0	0							1													600	0	0	162		0	0	0	0	0	0	162	0	0	0	0	0	0	0	0	0	0
chr18	74961833	74962433	74962229	74962378	149	15	0	0								1												600	0	0	149		0	0	0	0	0	0	0	149	0	0	0	0	0	0	0	0	0
chr18	74961833	74962433	74962230	74962362	132	12	0	0														1						600	0	0	132		0	0	0	0	0	0	0	0	0	0	0	0	0	132	0	0	0
chr18	74961833	74962433	74962235	74962399	164	15	0	0						1														600	0	0	164		0	0	0	0	0	164	0	0	0	0	0	0	0	0	0	0	0
chr18	74961833	74962433	74962236	74962378	142	14	0	0										1										600	0	0	142		0	0	0	0	0	0	0	0	0	142	0	0	0	0	0	0	0
chr18	74961833	74962433	74962237	74962434	197	19	0	0				1																600	0	1	196		0	0	0	196	0	0	0	0	0	0	0	0	0	0	0	0	0
chr18	74961833	74962433	74962239	74962381	142	13	1	0.0714286							1													600	0	0	142		0	0	0	0	0	0	142	0	0	0	0	0	0	0	0	0	0
chr18	74961833	74962433	74962240	74962430	190	19	0	0							1													600	0	0	190		0	0	0	0	0	0	190	0	0	0	0	0	0	0	0	0	0
chr18	74961833	74962433	74962241	74962325	84	8	0	0																		1		600	0	0	84		0	0	0	0	0	0	0	0	0	0	0	0	0	0	0	0	0
chr18	74961833	74962433	74962242	74962390	148	15	0	0														1						600	0	0	148		0	0	0	0	0	0	0	0	0	0	0	0	0	148	0	0	0
chr18	74961833	74962433	74962244	74962395	151	14	0	0																1				600	0	0	151		0	0	0	0	0	0	0	0	0	0	0	0	0	0	0	151	0
chr18	74961833	74962433	74962246	74962380	134	14	0	0														1						600	0	0	134		0	0	0	0	0	0	0	0	0	0	0	0	0	134	0	0	0
chr18	74961833	74962433	74962246	74962426	180	17	1	0.0555556														1						600	0	0	180		0	0	0	0	0	0	0	0	0	0	0	0	0	180	0	0	0
chr18	74961833	74962433	74962248	74962386	138	12	2	0.142857																1				600	0	0	138		0	0	0	0	0	0	0	0	0	0	0	0	0	0	0	138	0
chr18	74961833	74962433	74962250	74962344	94	8	0	0															1					600	0	0	94		0	0	0	0	0	0	0	0	0	0	0	0	0	0	94	0	0
chr18	74961833	74962433	74962256	74962385	129	13	0	0									1											600	0	0	129		0	0	0	0	0	0	0	0	129	0	0	0	0	0	0	0	0
chr18	74961833	74962433	74962261	74962345	84	7	0	0							1													600	0	0	84		0	0	0	0	0	0	84	0	0	0	0	0	0	0	0	0	0
chr18	74961833	74962433	74962262	74962378	116	12	1	0.0769231															1					600	0	0	116		0	0	0	0	0	0	0	0	0	0	0	0	0	0	116	0	0
chr18	74961833	74962433	74962266	74962318	52	4	0	0	1																			600	0	0	52		52	0	0	0	0	0	0	0	0	0	0	0	0	0	0	0	0
chr18	74961833	74962433	74962266	74962331	65	5	0	0		1																		600	0	0	65		0	65	0	0	0	0	0	0	0	0	0	0	0	0	0	0	0
chr18	74961833	74962433	74962266	74962339	73	5	0	0		1																		600	0	0	73		0	73	0	0	0	0	0	0	0	0	0	0	0	0	0	0	0
chr18	74961833	74962433	74962266	74962363	97	9	0	0		1																		600	0	0	97		0	97	0	0	0	0	0	0	0	0	0	0	0	0	0	0	0
chr18	74961833	74962433	74962266	74962397	131	12	0	0											1									600	0	0	131		0	0	0	0	0	0	0	0	0	0	131	0	0	0	0	0	0
chr18	74961833	74962433	74962266	74962406	140	13	0	0		1																		600	0	0	140		0	140	0	0	0	0	0	0	0	0	0	0	0	0	0	0	0
chr18	74961833	74962433	74962266	74962408	142	12	0	0		1																		600	0	0	142		0	142	0	0	0	0	0	0	0	0	0	0	0	0	0	0	0
chr18	74961833	74962433	74962266	74962437	171	16	0	0		1																		600	0	4	167		0	167	0	0	0	0	0	0	0	0	0	0	0	0	0	0	0
chr18	74961833	74962433	74962267	74962362	95	9	0	0	1																			600	0	0	95		95	0	0	0	0	0	0	0	0	0	0	0	0	0	0	0	0
chr18	74961833	74962433	74962267	74962401	134	11	2	0.153846													1							600	0	0	134		0	0	0	0	0	0	0	0	0	0	0	0	134	0	0	0	0
chr18	74961833	74962433	74962271	74962401	130	13	0	0																	1			600	0	0	130		0	0	0	0	0	0	0	0	0	0	0	0	0	0	0	0	130
chr18	74961833	74962433	74962271	74962418	147	13	1	0.0714286												1								600	0	0	147		0	0	0	0	0	0	0	0	0	0	0	147	0	0	0	0	0
chr18	74961833	74962433	74962272	74962318	46	4	0	0		1																		600	0	0	46		0	46	0	0	0	0	0	0	0	0	0	0	0	0	0	0	0
chr18	74961833	74962433	74962272	74962332	60	5	0	0	1																			600	0	0	60		60	0	0	0	0	0	0	0	0	0	0	0	0	0	0	0	0
chr18	74961833	74962433	74962272	74962339	67	5	0	0		1																		600	0	0	67		0	67	0	0	0	0	0	0	0	0	0	0	0	0	0	0	0
chr18	74961833	74962433	74962272	74962349	77	7	0	0		1																		600	0	0	77		0	77	0	0	0	0	0	0	0	0	0	0	0	0	0	0	0
chr18	74961833	74962433	74962272	74962356	84	8	0	0	1																			600	0	0	84		84	0	0	0	0	0	0	0	0	0	0	0	0	0	0	0	0
chr18	74961833	74962433	74962272	74962407	135	13	0	0	1																			600	0	0	135		135	0	0	0	0	0	0	0	0	0	0	0	0	0	0	0	0
chr18	74961833	74962433	74962272	74962538	239	28	0	0		1																		600	0	105	134		0	134	0	0	0	0	0	0	0	0	0	0	0	0	0	0	0
chr18	74961833	74962433	74962273	74962432	159	16	0	0				1																600	0	0	159		0	0	0	159	0	0	0	0	0	0	0	0	0	0	0	0	0
chr18	74961833	74962433	74962273	74962447	174	17	1	0.0555556																		1		600	0	14	160		0	0	0	0	0	0	0	0	0	0	0	0	0	0	0	0	0
chr18	74961833	74962433	74962274	74962407	133	13	0	0		1																		600	0	0	133		0	133	0	0	0	0	0	0	0	0	0	0	0	0	0	0	0
chr18	74961833	74962433	74962275	74962415	140	14	0	0			1																	600	0	0	140		0	0	140	0	0	0	0	0	0	0	0	0	0	0	0	0	0
chr18	74961833	74962433	74962277	74962398	121	12	0	0							1													600	0	0	121		0	0	0	0	0	0	121	0	0	0	0	0	0	0	0	0	0
chr18	74961833	74962433	74962277	74962413	136	14	0	0																1				600	0	0	136		0	0	0	0	0	0	0	0	0	0	0	0	0	0	0	136	0
chr18	74961833	74962433	74962277	74962427	150	16	0	0																1				600	0	0	150		0	0	0	0	0	0	0	0	0	0	0	0	0	0	0	150	0
chr18	74961833	74962433	74962278	74962326	48	5	0	0		1																		600	0	0	48		0	48	0	0	0	0	0	0	0	0	0	0	0	0	0	0	0
chr18	74961833	74962433	74962278	74962366	88	9	0	0		1																		600	0	0	88		0	88	0	0	0	0	0	0	0	0	0	0	0	0	0	0	0
chr18	74961833	74962433	74962279	74962420	141	12	3	0.2														1						600	0	0	141		0	0	0	0	0	0	0	0	0	0	0	0	0	141	0	0	0
chr18	74961833	74962433	74962280	74962431	151	14	1	0.0666667												1								600	0	0	151		0	0	0	0	0	0	0	0	0	0	0	151	0	0	0	0	0
chr18	74961833	74962433	74962282	74962376	94	11	0	0							1													600	0	0	94		0	0	0	0	0	0	94	0	0	0	0	0	0	0	0	0	0
chr18	74961833	74962433	74962282	74962418	136	12	1	0.0769231									1											600	0	0	136		0	0	0	0	0	0	0	0	136	0	0	0	0	0	0	0	0
chr18	74961833	74962433	74962283	74962437	154	15	0	0	1																			600	0	4	150		150	0	0	0	0	0	0	0	0	0	0	0	0	0	0	0	0
chr18	74961833	74962433	74962288	74962437	149	14	0	0	1																			600	0	4	145		145	0	0	0	0	0	0	0	0	0	0	0	0	0	0	0	0
chr18	74961833	74962433	74962291	74962366	75	7	0	0		1																		600	0	0	75		0	75	0	0	0	0	0	0	0	0	0	0	0	0	0	0	0
chr18	74961833	74962433	74962292	74962444	152	15	1	0.0625											1									600	0	11	141		0	0	0	0	0	0	0	0	0	0	141	0	0	0	0	0	0
chr18	74961833	74962433	74962296	74962440	144	13	1	0.0714286															1					600	0	7	137		0	0	0	0	0	0	0	0	0	0	0	0	0	0	137	0	0
chr18	74961833	74962433	74962299	74962437	138	13	0	0		1																		600	0	4	134		0	134	0	0	0	0	0	0	0	0	0	0	0	0	0	0	0
chr18	74961833	74962433	74962300	74962400	100	10	0	0	1																			600	0	0	100		100	0	0	0	0	0	0	0	0	0	0	0	0	0	0	0	0
chr18	74961833	74962433	74962300	74962421	84	6	0	0		1																		600	0	0	84		0	84	0	0	0	0	0	0	0	0	0	0	0	0	0	0	0
chr18	74961833	74962433	74962302	74962406	104	0	11	1									1											600	0	0	104		0	0	0	0	0	0	0	0	104	0	0	0	0	0	0	0	0
chr18	74961833	74962433	74962302	74962474	172	19	1	0.05																1				600	0	41	131		0	0	0	0	0	0	0	0	0	0	0	0	0	0	0	131	0
chr18	74961833	74962433	74962305	74962408	103	11	0	0	1																			600	0	0	103		103	0	0	0	0	0	0	0	0	0	0	0	0	0	0	0	0
chr18	74961833	74962433	74962306	74962348	42	5	0	0	1																			600	0	0	42		42	0	0	0	0	0	0	0	0	0	0	0	0	0	0	0	0
chr18	74961833	74962433	74962306	74962361	55	7	0	0		1																		600	0	0	55		0	55	0	0	0	0	0	0	0	0	0	0	0	0	0	0	0
chr18	74961833	74962433	74962306	74962435	129	13	0	0	1																			600	0	2	127		127	0	0	0	0	0	0	0	0	0	0	0	0	0	0	0	0
chr18	74961833	74962433	74962307	74962362	55	7	0	0		1																		600	0	0	55		0	55	0	0	0	0	0	0	0	0	0	0	0	0	0	0	0
chr18	74961833	74962433	74962307	74962437	130	13	0	0		1																		600	0	4	126		0	126	0	0	0	0	0	0	0	0	0	0	0	0	0	0	0
chr18	74961833	74962433	74962307	74962456	149	16	0	0		1																		600	0	23	126		0	126	0	0	0	0	0	0	0	0	0	0	0	0	0	0	0
chr18	74961833	74962433	74962308	74962350	42	5	0	0	1																			600	0	0	42		42	0	0	0	0	0	0	0	0	0	0	0	0	0	0	0	0
chr18	74961833	74962433	74962308	74962409	101	11	0	0	1																			600	0	0	101		101	0	0	0	0	0	0	0	0	0	0	0	0	0	0	0	0
chr18	74961833	74962433	74962309	74962407	98	11	0	0	1																			600	0	0	98		98	0	0	0	0	0	0	0	0	0	0	0	0	0	0	0	0
chr18	74961833	74962433	74962312	74962474	162	19	1	0.05											1									600	0	41	121		0	0	0	0	0	0	0	0	0	0	121	0	0	0	0	0	0
chr18	74961833	74962433	74962312	74962480	168	22	0	0										1										600	0	47	121		0	0	0	0	0	0	0	0	0	121	0	0	0	0	0	0	0
chr18	74961833	74962433	74962315	74962427	112	13	0	0												1								600	0	0	112		0	0	0	0	0	0	0	0	0	0	0	112	0	0	0	0	0
chr18	74961833	74962433	74962324	74962415	91	10	0	0																			1	600	0	0	91		0	0	0	0	0	0	0	0	0	0	0	0	0	0	0	0	0
chr18	74961833	74962433	74962327	74962366	39	4	0	0		1																		600	0	0	39		0	39	0	0	0	0	0	0	0	0	0	0	0	0	0	0	0
chr18	74961833	74962433	74962328	74962468	140	14	0	0											1									600	0	35	105		0	0	0	0	0	0	0	0	0	0	105	0	0	0	0	0	0
chr18	74961833	74962433	74962340	74962494	154	18	0	0										1										600	0	61	93		0	0	0	0	0	0	0	0	0	93	0	0	0	0	0	0	0
chr18	74961833	74962433	74962346	74962467	121	12	0	0						1														600	0	34	87		0	0	0	0	0	87	0	0	0	0	0	0	0	0	0	0	0
chr18	74961833	74962433	74962348	74962444	96	0	11	1									1											600	0	11	85		0	0	0	0	0	0	0	0	85	0	0	0	0	0	0	0	0
chr18	74961833	74962433	74962349	74962434	85	8	1	0.111111	1																			600	0	1	84		84	0	0	0	0	0	0	0	0	0	0	0	0	0	0	0	0
chr18	74961833	74962433	74962357	74962502	145	19	0	0														1						600	0	69	76		0	0	0	0	0	0	0	0	0	0	0	0	0	76	0	0	0
chr18	74961833	74962433	74962360	74962455	95	9	1	0.1																			1	600	0	22	73		0	0	0	0	0	0	0	0	0	0	0	0	0	0	0	0	0
chr18	74961833	74962433	74962365	74962440	75	7	0	0	1																			600	0	7	68		68	0	0	0	0	0	0	0	0	0	0	0	0	0	0	0	0
chr18	74961833	74962433	74962367	74962417	50	5	0	0	1																			600	0	0	50		50	0	0	0	0	0	0	0	0	0	0	0	0	0	0	0	0
chr18	74961833	74962433	74962368	74962425	57	7	0	0		1																		600	0	0	57		0	57	0	0	0	0	0	0	0	0	0	0	0	0	0	0	0
chr18	74961833	74962433	74962368	74962437	69	7	0	0		1																		600	0	4	65		0	65	0	0	0	0	0	0	0	0	0	0	0	0	0	0	0
chr18	74961833	74962433	74962369	74962433	64	6	0	0	1																			600	0	0	64		64	0	0	0	0	0	0	0	0	0	0	0	0	0	0	0	0
chr18	74961833	74962433	74962372	74962408	36	2	0	0		1																		600	0	0	36		0	36	0	0	0	0	0	0	0	0	0	0	0	0	0	0	0
chr18	74961833	74962433	74962372	74962415	43	3	0	0	1																			600	0	0	43		43	0	0	0	0	0	0	0	0	0	0	0	0	0	0	0	0
chr18	74961833	74962433	74962373	74962494	121	15	0	0										1										600	0	61	60		0	0	0	0	0	0	0	0	0	60	0	0	0	0	0	0	0
chr18	74961833	74962433	74962374	74962437	63	5	0	0		1																		600	0	4	59		0	59	0	0	0	0	0	0	0	0	0	0	0	0	0	0	0
chr18	74961833	74962433	74962378	74962440	62	4	0	0		1																		600	0	7	55		0	55	0	0	0	0	0	0	0	0	0	0	0	0	0	0	0
chr18	74961833	74962433	74962378	74962454	76	6	0	0		1																		600	0	21	55		0	55	0	0	0	0	0	0	0	0	0	0	0	0	0	0	0
chr18	74961833	74962433	74962378	74962498	120	15	0	0		1																		600	0	65	55		0	55	0	0	0	0	0	0	0	0	0	0	0	0	0	0	0
chr18	74961833	74962433	74962379	74962432	53	4	0	0	1																			600	0	0	53		53	0	0	0	0	0	0	0	0	0	0	0	0	0	0	0	0
chr18	74961833	74962433	74962382	74962437	55	3	1	0.25	1																			600	0	4	51		51	0	0	0	0	0	0	0	0	0	0	0	0	0	0	0	0
chr18	74961833	74962433	74962383	74962498	115	14	0	0	1																			600	0	65	50		50	0	0	0	0	0	0	0	0	0	0	0	0	0	0	0	0
chr18	74961833	74962433	74962415	74962536	121	16	0	0																			1	600	0	103	18		0	0	0	0	0	0	0	0	0	0	0	0	0	0	0	0	0
									76	136	19	15	8	31	30	20	22	22	29	25	25	27	25	27	16	19	21						7721	13365	2316	2137	1200	4069	3979	2628	2504	2437	3565	3234	3779	3504	2924	3693	2123
																																	12.8683	22.275	3.86	3.56167	2	6.78167	6.63167	4.38	4.17333	4.06167	5.94167	5.39	6.29833	5.84	4.87333	6.155	3.53833
																																	average liver tissue
																																	17.5717
																																	average lung tumor cfDNA
																																	4.59907
																																	average normal CfDNA
																																	4.58125
																																	average liver cfDNA
																																	5.60042
[truncated: 3 more columns]

## Sheet: CUHK_TLX
chr	interval_start	interval_stop	methSeqStart	methSeqStop	methSeqLength	numU	numM	MD	HOT227	HOT197	CTR134	CTR111	HOT222	CTR129	HOT156	CTR86	HOT240	CTR153	CTR97	HOT236	CTR148	CTR132	HOT170	HOT215	CTR107	HOT164	CTR114	CTR152	CTR101	CTR84	HOT204	CTR151	CTR127	HOT198	CTR98	CTR128	CTR103	CTR113	HOT229	HOT205	CTR131	CTR117	CTR108	HOT233	HOT224	CTR110	HOT208	CTR147	HOT172
chr10	102894743	102895343	102894646	102894746	100	9	0	0																						1
chr10	102894743	102895343	102894658	102894758	100	7	0	0																											1
chr10	102894743	102895343	102894663	102894763	100	7	0	0											1											1					1
chr10	102894743	102895343	102894670	102894745	75	7	0	0													1								1												1
chr10	102894743	102895343	102894671	102894746	75	6	1	0.142857				1
chr10	102894743	102895343	102894671	102894746	75	7	0	0
chr10	102894743	102895343	102894672	102894747	75	6	1	0.142857							2
chr10	102894743	102895343	102894672	102894747	75	7	0	0
chr10	102894743	102895343	102894673	102894748	75	7	0	0				2
chr10	102894743	102895343	102894674	102894749	75	6	1	0.142857
chr10	102894743	102895343	102894674	102894749	75	7	0	0									1									2																			1
chr10	102894743	102895343	102894676	102894751	75	7	0	0
chr10	102894743	102895343	102894677	102894752	75	7	0	0
chr10	102894743	102895343	102894681	102894756	75	7	0	0																					1												1
chr10	102894743	102895343	102894682	102894757	75	7	0	0
chr10	102894743	102895343	102894684	102894759	75	7	0	0										1
chr10	102894743	102895343	102894690	102894765	75	4	1	0.2
chr10	102894743	102895343	102894690	102894765	75	5	0	0																	1
chr10	102894743	102895343	102894691	102894751	60	4	0	0
chr10	102894743	102895343	102894691	102894766	75	4	0	0																										1
chr10	102894743	102895343	102894692	102894767	75	4	0	0																																				1
chr10	102894743	102895343	102894693	102894768	75	4	0	0					1
chr10	102894743	102895343	102894695	102894795	100	4	0	0											1
chr10	102894743	102895343	102894697	102894772	75	3	0	0
chr10	102894743	102895343	102894698	102894773	75	3	0	0																			1												1
chr10	102894743	102895343	102894706	102894781	75	2	0	0					1																															1
chr10	102894743	102895343	102894709	102894784	75	1	0	0									1
chr10	102894743	102895343	102894732	102894807	75	1	0	0				1
chr10	102894743	102895343	102894737	102894812	75	1	0	0
chr10	102894743	102895343	102894753	102894828	75	1	0	0												1
chr10	102894743	102895343	102894759	102894834	75	1	0	0
chr10	102894743	102895343	102894760	102894835	75	1	0	0																									1
chr10	102894743	102895343	102894761	102894836	75	1	0	0
chr10	102894743	102895343	102894765	102894840	75	1	0	0														1
chr10	102894743	102895343	102894766	102894841	75	1	0	0																																		1
chr10	102894743	102895343	102894774	102894849	75	3	0	0																1
chr10	102894743	102895343	102894776	102894851	75	3	0	0			1						2
chr10	102894743	102895343	102894777	102894811	34	1	0	0										1
chr10	102894743	102895343	102894777	102894852	75	3	0	0
chr10	102894743	102895343	102894778	102894853	75	4	0	0																															1							1
chr10	102894743	102895343	102894779	102894854	75	4	0	0																																1
chr10	102894743	102895343	102894781	102894856	75	4	0	0																														1
chr10	102894743	102895343	102894782	102894857	75	4	0	0
chr10	102894743	102895343	102894783	102894858	75	4	0	0																													1
chr10	102894743	102895343	102894786	102894861	75	5	0	0																	1															2
chr10	102894743	102895343	102894787	102894862	75	4	1	0.2																																				1
chr10	102894743	102895343	102894787	102894862	75	5	0	0
chr10	102894743	102895343	102894788	102894863	75	4	1	0.2
chr10	102894743	102895343	102894789	102894864	75	5	0	0														1
chr10	102894743	102895343	102894790	102894865	75	5	0	0																																		1
chr10	102894743	102895343	102894791	102894866	75	0	5	1
chr10	102894743	102895343	102894792	102894867	75	5	0	0				1
chr10	102894743	102895343	102894793	102894868	75	5	0	0									1
chr10	102894743	102895343	102894794	102894869	75	1	4	0.8					1
chr10	102894743	102895343	102894794	102894869	75	5	0	0					1							1
chr10	102894743	102895343	102894795	102894870	75	5	0	0																					1														1
chr10	102894743	102895343	102894797	102894872	75	2	3	0.6
chr10	102894743	102895343	102894797	102894872	75	5	0	0
chr10	102894743	102895343	102894798	102894873	75	5	0	0				1																											1	1				1
chr10	102894743	102895343	102894799	102894874	75	5	0	0												1											1
chr10	102894743	102895343	102894799	102894899	100	9	0	0																						1
chr10	102894743	102895343	102894800	102894875	75	2	4	0.666667
chr10	102894743	102895343	102894800	102894875	75	6	0	0						1																		1					4		1					1
chr10	102894743	102895343	102894801	102894876	75	4	2	0.333333																																1
chr10	102894743	102895343	102894801	102894876	75	5	1	0.166667		1
chr10	102894743	102895343	102894801	102894876	75	6	0	0													2																	1
chr10	102894743	102895343	102894802	102894877	75	6	0	0																																1
chr10	102894743	102895343	102894803	102894878	75	4	1	0.2
chr10	102894743	102895343	102894803	102894878	75	4	2	0.333333																1
chr10	102894743	102895343	102894803	102894878	75	5	0	0
chr10	102894743	102895343	102894804	102894879	75	4	1	0.2																							1
chr10	102894743	102895343	102894804	102894879	75	5	0	0																							1
chr10	102894743	102895343	102894804	102894904	100	9	0	0																											2
chr10	102894743	102895343	102894805	102894880	75	5	0	0
chr10	102894743	102895343	102894806	102894881	75	5	0	0
chr10	102894743	102895343	102894807	102894882	75	0	5	1
chr10	102894743	102895343	102894807	102894882	75	4	1	0.2																																									1
chr10	102894743	102895343	102894807	102894882	75	5	0	0				1
chr10	102894743	102895343	102894808	102894883	75	5	0	0
chr10	102894743	102895343	102894809	102894884	75	5	0	0
chr10	102894743	102895343	102894810	102894885	75	5	0	0													1
chr10	102894743	102895343	102894811	102894886	75	5	0	0																1
chr10	102894743	102895343	102894813	102894888	75	5	0	0					1																											1
chr10	102894743	102895343	102894813	102894913	100	9	0	0											1
chr10	102894743	102895343	102894814	102894889	75	5	0	0
chr10	102894743	102895343	102894816	102894891	75	4	1	0.2																					1
chr10	102894743	102895343	102894816	102894891	75	5	0	0																1	2				1									2
chr10	102894743	102895343	102894817	102894892	75	4	2	0.333333															1
chr10	102894743	102895343	102894817	102894892	75	6	0	0													1								1																	2
chr10	102894743	102895343	102894818	102894893	75	4	2	0.333333
chr10	102894743	102895343	102894819	102894894	75	6	1	0.142857				1
chr10	102894743	102895343	102894819	102894919	100	10	0	0								2
chr10	102894743	102895343	102894820	102894895	75	6	1	0.142857
chr10	102894743	102895343	102894820	102894895	75	7	0	0
chr10	102894743	102895343	102894821	102894896	75	7	1	0.125
chr10	102894743	102895343	102894821	102894896	75	8	0	0																									2
chr10	102894743	102895343	102894822	102894897	75	7	0	0										1
chr10	102894743	102895343	102894822	102894897	75	8	0	0										1										2	1
chr10	102894743	102895343	102894822	102894922	100	10	0	0								1
chr10	102894743	102895343	102894823	102894898	75	8	0	0
chr10	102894743	102895343	102894826	102894901	75	8	0	0									1											2								2
chr10	102894743	102895343	102894827	102894902	75	8	0	0																																								1
chr10	102894743	102895343	102894828	102894903	75	8	0	0		1
chr10	102894743	102895343	102894828	102894928	100	9	1	0.1																						2
chr10	102894743	102895343	102894828	102894928	100	10	0	0																						3
chr10	102894743	102895343	102894829	102894904	75	1	7	0.875
chr10	102894743	102895343	102894829	102894904	75	8	0	0																	1
chr10	102894743	102895343	102894830	102894930	100	10	0	0																						1
chr10	102894743	102895343	102894832	102894907	75	8	0	0
chr10	102894743	102895343	102894832	102894907	75	9	0	0										1
chr10	102894743	102895343	102894833	102894886	53	5	0	0															1
chr10	102894743	102895343	102894833	102894908	75	8	0	0																1
chr10	102894743	102895343	102894833	102894908	75	9	0	0													1
chr10	102894743	102895343	102894833	102894933	100	11	0	0								1			1
chr10	102894743	102895343	102894834	102894909	75	9	0	0																										1															1
chr10	102894743	102895343	102894835	102894910	75	9	0	0
chr10	102894743	102895343	102894836	102894911	75	0	9	1
chr10	102894743	102895343	102894836	102894911	75	8	0	0
chr10	102894743	102895343	102894836	102894911	75	9	0	0
chr10	102894743	102895343	102894837	102894881	44	5	0	0																										2
chr10	102894743	102895343	102894837	102894912	75	9	0	0
chr10	102894743	102895343	102894838	102894881	43	5	0	0
chr10	102894743	102895343	102894838	102894913	75	9	0	0
chr10	102894743	102895343	102894838	102894913	75	10	0	0
chr10	102894743	102895343	102894839	102894914	75	0	10	1
chr10	102894743	102895343	102894839	102894914	75	9	0	0
chr10	102894743	102895343	102894839	102894914	75	10	0	0
chr10	102894743	102895343	102894839	102894939	100	11	0	0								1
chr10	102894743	102895343	102894840	102894915	75	6	4	0.4
chr10	102894743	102895343	102894840	102894915	75	9	1	0.1
chr10	102894743	102895343	102894840	102894915	75	10	0	0																																				1
chr10	102894743	102895343	102894841	102894916	75	10	0	0				1														2												1
chr10	102894743	102895343	102894842	102894917	75	10	0	0															1	1																			2
chr10	102894743	102895343	102894842	102894942	100	11	0	0
chr10	102894743	102895343	102894843	102894918	75	9	0	0
chr10	102894743	102895343	102894843	102894943	100	11	0	0								1																			2
chr10	102894743	102895343	102894844	102894919	75	7	2	0.222222	1
chr10	102894743	102895343	102894844	102894919	75	9	0	0													1
chr10	102894743	102895343	102894844	102894944	100	10	0	0								1
chr10	102894743	102895343	102894845	102894920	75	9	0	0																	2				2
chr10	102894743	102895343	102894846	102894921	75	9	0	0				1																																		1
chr10	102894743	102895343	102894846	102894946	100	6	4	0.4																						2
chr10	102894743	102895343	102894847	102894922	75	0	9	1
chr10	102894743	102895343	102894847	102894922	75	6	3	0.333333																																					1
chr10	102894743	102895343	102894847	102894922	75	9	0	0													1																							1
chr10	102894743	102895343	102894848	102894923	75	0	9	1
chr10	102894743	102895343	102894848	102894923	75	9	0	0																															1
chr10	102894743	102895343	102894849	102894924	75	0	9	1
chr10	102894743	102895343	102894849	102894924	75	2	6	0.75
chr10	102894743	102895343	102894849	102894924	75	9	0	0
chr10	102894743	102895343	102894850	102894899	49	6	0	0																	1
chr10	102894743	102895343	102894850	102894925	75	7	0	0																																							1	1
chr10	102894743	102895343	102894850	102894925	75	8	0	0										1						1			1		2																			2
chr10	102894743	102895343	102894851	102894926	75	8	0	0																												1				1					2			5
chr10	102894743	102895343	102894852	102894927	75	0	8	1
chr10	102894743	102895343	102894852	102894927	75	7	1	0.125
chr10	102894743	102895343	102894852	102894927	75	8	0	0							2																								1	1		5							1
chr10	102894743	102895343	102894853	102894928	75	8	0	0																																		3
chr10	102894743	102895343	102894854	102894909	55	6	0	0
chr10	102894743	102895343	102894854	102894929	75	7	0	0									1			1											1	1								1			1
chr10	102894743	102895343	102894855	102894930	75	5	1	0.166667
chr10	102894743	102895343	102894855	102894930	75	6	1	0.142857
chr10	102894743	102895343	102894855	102894930	75	7	0	0																															1
chr10	102894743	102895343	102894856	102894931	75	0	7	1
chr10	102894743	102895343	102894856	102894931	75	8	0	0
chr10	102894743	102895343	102894857	102894932	75	8	0	0				1
chr10	102894743	102895343	102894858	102894933	75	6	2	0.25																					1
chr10	102894743	102895343	102894858	102894933	75	8	0	0														1
chr10	102894743	102895343	102894859	102894934	75	1	7	0.875
chr10	102894743	102895343	102894859	102894934	75	8	0	0
chr10	102894743	102895343	102894860	102894897	37	5	0	0									1
chr10	102894743	102895343	102894860	102894935	75	0	7	1
chr10	102894743	102895343	102894860	102894935	75	6	0	0
chr10	102894743	102895343	102894860	102894935	75	7	0	0																																	1
chr10	102894743	102895343	102894860	102894935	75	8	0	0
chr10	102894743	102895343	102894861	102894936	75	6	0	0																																				1
chr10	102894743	102895343	102894861	102894936	75	7	0	0						1									1
chr10	102894743	102895343	102894862	102894937	75	6	1	0.142857
chr10	102894743	102895343	102894862	102894937	75	7	0	0																							1																		1
chr10	102894743	102895343	102894863	102894934	71	7	0	0											1
chr10	102894743	102895343	102894863	102894938	75	6	1	0.142857	1
chr10	102894743	102895343	102894863	102894938	75	7	0	0	1					1						1																	1		1								2		2
chr10	102894743	102895343	102894864	102894915	51	6	0	0							1
chr10	102894743	102895343	102894864	102894939	75	0	7	1
chr10	102894743	102895343	102894864	102894939	75	3	4	0.571429																																				1
chr10	102894743	102895343	102894864	102894939	75	6	0	0																													1
chr10	102894743	102895343	102894864	102894939	75	6	1	0.142857
chr10	102894743	102895343	102894864	102894939	75	7	0	0																	2							1					2		1										1
chr10	102894743	102895343	102894864	102894964	100	9	0	0											1
chr10	102894743	102895343	102894865	102894940	75	6	0	0														1
chr10	102894743	102895343	102894865	102894940	75	6	1	0.142857																1
chr10	102894743	102895343	102894865	102894940	75	7	0	0	1								1								2	1											6					1				1
chr10	102894743	102895343	102894866	102894941	75	5	2	0.285714
chr10	102894743	102895343	102894866	102894941	75	7	0	0									1																									1
chr10	102894743	102895343	102894866	102894966	100	8	1	0.111111
chr10	102894743	102895343	102894867	102894942	75	7	0	0																				1				2
chr10	102894743	102895343	102894867	102894967	100	9	0	0											1
chr10	102894743	102895343	102894868	102894943	75	7	0	0												2	1											1												1
chr10	102894743	102895343	102894868	102894968	100	9	0	0											1
chr10	102894743	102895343	102894869	102894944	75	7	0	0
chr10	102894743	102895343	102894870	102894945	75	0	7	1
chr10	102894743	102895343	102894870	102894945	75	6	1	0.142857
chr10	102894743	102895343	102894870	102894945	75	7	0	0													1						3
chr10	102894743	102895343	102894871	102894946	75	6	1	0.142857																							2
chr10	102894743	102895343	102894871	102894946	75	7	0	0
chr10	102894743	102895343	102894872	102894935	63	7	0	0																							1
chr10	102894743	102895343	102894872	102894947	75	7	0	0									1						1
chr10	102894743	102895343	102894873	102894948	75	1	7	0.875
chr10	102894743	102895343	102894873	102894948	75	3	4	0.571429
chr10	102894743	102895343	102894873	102894948	75	7	0	0										1
chr10	102894743	102895343	102894874	102894949	75	8	0	0	1
chr10	102894743	102895343	102894874	102894974	100	8	0	0											1
chr10	102894743	102895343	102894875	102894950	75	8	0	0
chr10	102894743	102895343	102894876	102894912	36	4	0	0
chr10	102894743	102895343	102894877	102894952	75	6	1	0.142857
chr10	102894743	102895343	102894879	102894933	54	6	0	0
chr10	102894743	102895343	102894879	102894954	75	0	7	1
chr10	102894743	102895343	102894880	102894920	40	5	0	0																		1
chr10	102894743	102895343	102894880	102894941	61	6	0	0
chr10	102894743	102895343	102894880	102894955	75	1	6	0.857143
chr10	102894743	102895343	102894882	102894957	75	7	0	0
chr10	102894743	102895343	102894883	102894958	75	7	0	0																																1
chr10	102894743	102895343	102894884	102894959	75	1	6	0.857143
chr10	102894743	102895343	102894884	102894959	75	7	0	0							1		1			2									1																1			2	1
chr10	102894743	102895343	102894884	102894984	100	9	1	0.1											1
chr10	102894743	102895343	102894885	102894960	75	0	7	1
chr10	102894743	102895343	102894885	102894960	75	7	0	0																												1												3
chr10	102894743	102895343	102894886	102894961	75	0	7	1
chr10	102894743	102895343	102894886	102894961	75	7	0	0									1															1
chr10	102894743	102895343	102894887	102894962	75	8	0	0	1																									1
chr10	102894743	102895343	102894888	102894963	75	1	7	0.875
chr10	102894743	102895343	102894888	102894963	75	7	0	0
chr10	102894743	102895343	102894888	102894963	75	8	0	0																					1																			1
chr10	102894743	102895343	102894889	102894964	75	3	5	0.625
chr10	102894743	102895343	102894889	102894964	75	8	0	0							1						1																							1
chr10	102894743	102895343	102894890	102894935	45	6	0	0
chr10	102894743	102895343	102894890	102894942	52	6	0	0																																		1
chr10	102894743	102895343	102894890	102894965	75	8	0	0			1				1							1																		1									1
chr10	102894743	102895343	102894890	102894990	100	10	0	0											1
chr10	102894743	102895343	102894893	102894968	75	7	0	0																																1
chr10	102894743	102895343	102894894	102894969	75	5	1	0.166667
chr10	102894743	102895343	102894895	102894970	75	6	0	0									2					1
chr10	102894743	102895343	102894896	102894971	75	6	0	0												1																								1
chr10	102894743	102895343	102894897	102894972	75	4	1	0.2
chr10	102894743	102895343	102894898	102894973	75	5	0	0
chr10	102894743	102895343	102894899	102894974	75	0	5	1
chr10	102894743	102895343	102894899	102894974	75	4	0	0
chr10	102894743	102895343	102894899	102894974	75	5	0	0																										1
chr10	102894743	102895343	102894900	102894975	75	5	0	0													1	2																						1
chr10	102894743	102895343	102894901	102894952	51	4	0	0												1
chr10	102894743	102895343	102894901	102894976	75	5	0	0									3
chr10	102894743	102895343	102894902	102894977	75	5	0	0
chr10	102894743	102895343	102894903	102894978	75	3	2	0.4
chr10	102894743	102895343	102894904	102894979	75	4	0	0												2
chr10	102894743	102895343	102894904	102894979	75	5	0	0																																									1
chr10	102894743	102895343	102894905	102894980	75	4	0	0																																					1
chr10	102894743	102895343	102894905	102894980	75	5	0	0
chr10	102894743	102895343	102894910	102894985	75	6	0	0			1				4		1					1																										1
chr10	102894743	102895343	102894911	102894986	75	6	0	0
chr10	102894743	102895343	102894911	102895011	100	6	0	0											1
chr10	102894743	102895343	102894912	102894987	75	6	0	0
chr10	102894743	102895343	102894913	102894988	75	5	0	0												1
chr10	102894743	102895343	102894916	102894991	75	5	0	0
chr10	102894743	102895343	102894918	102894993	75	5	0	0																																1
chr10	102894743	102895343	102894919	102894994	75	5	0	0
chr10	102894743	102895343	102894921	102894996	75	5	0	0
chr10	102894743	102895343	102894922	102894997	75	0	5	1
chr10	102894743	102895343	102894922	102894997	75	5	0	0																												1
chr10	102894743	102895343	102894923	102894998	75	5	0	0
chr10	102894743	102895343	102894924	102894999	75	5	0	0
chr10	102894743	102895343	102894926	102895001	75	4	1	0.2
chr10	102894743	102895343	102894927	102895002	75	5	0	0												1
chr10	102894743	102895343	102894927	102895027	100	7	0	0											1
chr10	102894743	102895343	102894928	102895003	75	4	0	0																	1			1
chr10	102894743	102895343	102894928	102895003	75	5	0	0							2			2																1
chr10	102894743	102895343	102894929	102895004	75	4	0	0
chr10	102894743	102895343	102894929	102895004	75	5	0	0
chr10	102894743	102895343	102894930	102895005	75	5	0	0										1											1
chr10	102894743	102895343	102894931	102895006	75	4	0	0
chr10	102894743	102895343	102894931	102895006	75	5	0	0																																1
chr10	102894743	102895343	102894932	102895007	75	4	0	0																									2
chr10	102894743	102895343	102894932	102895032	100	6	0	0								1
chr10	102894743	102895343	102894933	102895008	75	4	0	0
chr10	102894743	102895343	102894933	102895033	100	6	0	0								1
chr10	102894743	102895343	102894934	102895009	75	4	0	0			1
chr10	102894743	102895343	102894934	102895034	100	6	0	0								1			3											1
chr10	102894743	102895343	102894935	102895010	75	1	3	0.75
chr10	102894743	102895343	102894935	102895010	75	4	0	0						1								1																							1
chr10	102894743	102895343	102894937	102895012	75	1	3	0.75
chr10	102894743	102895343	102894937	102895012	75	2	2	0.5
chr10	102894743	102895343	102894937	102895012	75	4	0	0				1															2		2		1							4				1			1				1
chr10	102894743	102895343	102894937	102895037	100	7	0	0											1
chr10	102894743	102895343	102894938	102895013	75	4	0	0					1	1
chr10	102894743	102895343	102894939	102895014	75	0	4	1
chr10	102894743	102895343	102894939	102895014	75	4	0	0		1			2		3								2													3												1	2
chr10	102894743	102895343	102894940	102895015	75	3	0	0
chr10	102894743	102895343	102894940	102895015	75	3	1	0.25									1
chr10	102894743	102895343	102894940	102895015	75	4	0	0					1					1					1														2			1			1	2	1			3
chr10	102894743	102895343	102894940	102895040	100	7	0	0																											2
chr10	102894743	102895343	102894941	102895016	75	3	1	0.25
chr10	102894743	102895343	102894941	102895016	75	4	0	0		1													1															1	1		2		3			2
chr10	102894743	102895343	102894941	102895041	100	8	0	0																											1
chr10	102894743	102895343	102894942	102894996	54	4	0	0
chr10	102894743	102895343	102894942	102895017	75	4	0	0
chr10	102894743	102895343	102894943	102895018	75	4	0	0													1	1																	1
chr10	102894743	102895343	102894944	102895019	75	4	0	0
chr10	102894743	102895343	102894944	102895019	75	5	0	0
chr10	102894743	102895343	102894945	102895003	58	4	0	0
chr10	102894743	102895343	102894945	102895020	75	1	4	0.8
chr10	102894743	102895343	102894945	102895020	75	5	0	0
chr10	102894743	102895343	102894945	102895045	100	9	0	0																						1
chr10	102894743	102895343	102894947	102895022	75	5	0	0					1
chr10	102894743	102895343	102894947	102895022	75	5	1	0.166667
chr10	102894743	102895343	102894947	102895022	75	6	0	0																										1
chr10	102894743	102895343	102894947	102895047	100	10	0	0																											2
chr10	102894743	102895343	102894948	102895023	75	0	6	1
chr10	102894743	102895343	102894948	102895023	75	5	0	0																		3																			1
chr10	102894743	102895343	102894948	102895023	75	6	0	0					1												2									1
chr10	102894743	102895343	102894949	102895024	75	3	2	0.4							1
chr10	102894743	102895343	102894949	102895024	75	4	0	0																3																2									1
chr10	102894743	102895343	102894949	102895024	75	4	1	0.2																															1
chr10	102894743	102895343	102894949	102895024	75	5	0	0					2	1	1		2			2	1				2	1								1		1		2							2
chr10	102894743	102895343	102894950	102894993	43	3	0	0
chr10	102894743	102895343	102894950	102895025	75	4	0	0																																		1
chr10	102894743	102895343	102894950	102895025	75	5	0	0					2																		3											2
chr10	102894743	102895343	102894951	102895026	75	5	0	0																																1
chr10	102894743	102895343	102894952	102895027	75	4	0	0
chr10	102894743	102895343	102894952	102895027	75	5	0	0																										1
chr10	102894743	102895343	102894952	102895052	100	10	0	0											1
chr10	102894743	102895343	102894953	102895028	75	5	0	0					1
chr10	102894743	102895343	102894954	102895007	53	3	0	0																												1
chr10	102894743	102895343	102894954	102895029	75	5	0	0							4						1																						1
chr10	102894743	102895343	102894954	102895054	100	10	0	0																											1
chr10	102894743	102895343	102894955	102895030	75	5	0	0																																									1
chr10	102894743	102895343	102894955	102895055	100	10	0	0																						1
chr10	102894743	102895343	102894956	102895031	75	0	5	1
chr10	102894743	102895343	102894956	102895031	75	5	0	0
chr10	102894743	102895343	102894957	102895032	75	1	4	0.8
chr10	102894743	102895343	102894957	102895032	75	4	1	0.2
chr10	102894743	102895343	102894957	102895032	75	5	0	0					1											1																								2
chr10	102894743	102895343	102894957	102895057	100	11	0	0								1
chr10	102894743	102895343	102894958	102894996	38	3	0	0											1
chr10	102894743	102895343	102894958	102895033	75	0	5	1
chr10	102894743	102895343	102894958	102895033	75	1	4	0.8
chr10	102894743	102895343	102894958	102895033	75	2	3	0.6
chr10	102894743	102895343	102894958	102895033	75	4	0	0																																							1
chr10	102894743	102895343	102894958	102895033	75	4	1	0.2																																1
chr10	102894743	102895343	102894958	102895033	75	5	0	0			1				2						5			2			1					1					4		3							1	2	1
chr10	102894743	102895343	102894958	102895058	100	7	4	0.363636								2
chr10	102894743	102895343	102894958	102895058	100	11	0	0								1			1											1					1
chr10	102894743	102895343	102894959	102895034	75	0	5	1
chr10	102894743	102895343	102894959	102895034	75	1	4	0.8
chr10	102894743	102895343	102894959	102895034	75	3	2	0.4																																									1
chr10	102894743	102895343	102894959	102895034	75	4	0	0																					1								1								1
chr10	102894743	102895343	102894959	102895034	75	4	1	0.2
chr10	102894743	102895343	102894959	102895034	75	5	0	0	1	1			3	1			2				1	2	3		1		4	1	2			4		1				2							3	3		5	1
chr10	102894743	102895343	102894959	102895059	100	10	0	0																											1
chr10	102894743	102895343	102894959	102895059	100	11	0	0																											1
chr10	102894743	102895343	102894960	102894994	34	3	0	0																													1
chr10	102894743	102895343	102894960	102895000	40	3	0	0
chr10	102894743	102895343	102894960	102895035	75	5	0	0				1	1																								3	1	1
chr10	102894743	102895343	102894960	102895035	75	6	0	0																																1
chr10	102894743	102895343	102894960	102895060	100	11	0	0											1
chr10	102894743	102895343	102894960	102895060	100	12	0	0
chr10	102894743	102895343	102894961	102895036	75	0	6	1
chr10	102894743	102895343	102894961	102895036	75	4	1	0.2					1
chr10	102894743	102895343	102894961	102895036	75	5	0	0				1
chr10	102894743	102895343	102894961	102895036	75	6	0	0							2								1											1
chr10	102894743	102895343	102894961	102895061	100	11	0	0																						1
chr10	102894743	102895343	102894961	102895061	100	12	0	0																						1
chr10	102894743	102895343	102894962	102894990	28	2	0	0																				1
chr10	102894743	102895343	102894962	102895037	75	0	5	1
chr10	102894743	102895343	102894962	102895037	75	5	0	0													2						1
chr10	102894743	102895343	102894962	102895062	100	11	0	0								1
chr10	102894743	102895343	102894963	102895038	75	5	0	0																					2
chr10	102894743	102895343	102894964	102895039	75	0	5	1
chr10	102894743	102895343	102894964	102895039	75	5	0	0
chr10	102894743	102895343	102894965	102895040	75	0	5	1
chr10	102894743	102895343	102894965	102895040	75	5	0	0																					1
chr10	102894743	102895343	102894966	102895041	75	4	2	0.333333															1
chr10	102894743	102895343	102894966	102895041	75	5	0	0																		2
chr10	102894743	102895343	102894966	102895041	75	6	0	0					1									1
chr10	102894743	102895343	102894967	102895042	75	0	6	1
chr10	102894743	102895343	102894967	102895042	75	5	1	0.166667
chr10	102894743	102895343	102894967	102895042	75	6	0	0
chr10	102894743	102895343	102894968	102895043	75	0	6	1
chr10	102894743	102895343	102894968	102895043	75	6	0	0																					2														3	1	1				1
chr10	102894743	102895343	102894968	102895068	100	11	0	0																						1
chr10	102894743	102895343	102894969	102895044	75	1	5	0.833333
chr10	102894743	102895343	102894969	102895044	75	6	0	0	1				1													2												2
chr10	102894743	102895343	102894969	102895044	75	7	0	0						3
chr10	102894743	102895343	102894969	102895069	100	11	0	0																						2
chr10	102894743	102895343	102894970	102895045	75	7	0	0																																				1					1
chr10	102894743	102895343	102894970	102895070	100	11	0	0											2
chr10	102894743	102895343	102894971	102895046	75	7	0	0						1
chr10	102894743	102895343	102894972	102895047	75	0	7	1
chr10	102894743	102895343	102894972	102895047	75	6	0	0																								1
chr10	102894743	102895343	102894972	102895047	75	7	0	0																								1																1
chr10	102894743	102895343	102894972	102895072	100	11	0	0								1
chr10	102894743	102895343	102894973	102895048	75	8	0	0																										1
chr10	102894743	102895343	102894973	102895073	100	11	0	0																						1					1
chr10	102894743	102895343	102894974	102895049	75	8	0	0																																							1
chr10	102894743	102895343	102894974	102895074	100	11	0	0																						3					5
chr10	102894743	102895343	102894975	102895050	75	2	6	0.75
chr10	102894743	102895343	102894975	102895050	75	4	4	0.5
chr10	102894743	102895343	102894975	102895050	75	8	0	0																	2																	4			1
chr10	102894743	102895343	102894975	102895050	75	9	0	0
chr10	102894743	102895343	102894975	102895075	100	11	0	0																						2
chr10	102894743	102895343	102894976	102895051	75	0	9	1
chr10	102894743	102895343	102894976	102895051	75	8	0	0
chr10	102894743	102895343	102894976	102895051	75	8	1	0.111111
chr10	102894743	102895343	102894976	102895051	75	9	0	0														1																						2
chr10	102894743	102895343	102894977	102895052	75	8	0	0
chr10	102894743	102895343	102894978	102895009	31	2	0	0
chr10	102894743	102895343	102894978	102895053	75	9	0	0										2																			1		1		2							1
chr10	102894743	102895343	102894978	102895078	100	11	0	0								2
chr10	102894743	102895343	102894979	102895054	75	8	1	0.111111				1
chr10	102894743	102895343	102894979	102895054	75	9	0	0			1		4				1				3										1						1							4
chr10	102894743	102895343	102894980	102895055	75	9	0	0						1												2
chr10	102894743	102895343	102894981	102895034	53	3	0	0											1
chr10	102894743	102895343	102894981	102895056	75	7	1	0.125
chr10	102894743	102895343	102894981	102895056	75	9	0	0																							2
chr10	102894743	102895343	102894981	102895081	100	10	0	0																											1
chr10	102894743	102895343	102894982	102895057	75	8	0	0
chr10	102894743	102895343	102894982	102895057	75	9	0	0																	1																						2
chr10	102894743	102895343	102894983	102895058	75	6	3	0.333333
chr10	102894743	102895343	102894983	102895058	75	8	0	0
chr10	102894743	102895343	102894983	102895058	75	9	0	0												3																				1		2						1
chr10	102894743	102895343	102894984	102895059	75	8	0	0		1			1					1		2	1											1					6									1		3
chr10	102894743	102895343	102894984	102895084	100	9	0	0																											2
chr10	102894743	102895343	102894985	102895060	75	0	9	1
chr10	102894743	102895343	102894985	102895060	75	9	0	0
chr10	102894743	102895343	102894986	102895061	75	0	9	1
chr10	102894743	102895343	102894986	102895061	75	8	0	0						1
chr10	102894743	102895343	102894986	102895061	75	9	0	0		1										1						1						1
chr10	102894743	102895343	102894987	102895062	75	7	0	0
chr10	102894743	102895343	102894987	102895062	75	7	2	0.222222																							1
chr10	102894743	102895343	102894987	102895062	75	8	1	0.111111																																									1
chr10	102894743	102895343	102894987	102895062	75	9	0	0					2												1							2
chr10	102894743	102895343	102894988	102895063	75	5	4	0.444444
chr10	102894743	102895343	102894988	102895063	75	7	2	0.222222
chr10	102894743	102895343	102894988	102895063	75	9	0	0							2
chr10	102894743	102895343	102894989	102895030	41	2	0	0
chr10	102894743	102895343	102894989	102895064	75	8	1	0.111111																1
chr10	102894743	102895343	102894989	102895064	75	9	0	0									2															1
chr10	102894743	102895343	102894990	102895065	75	1	8	0.888889
chr10	102894743	102895343	102894990	102895065	75	6	3	0.333333
chr10	102894743	102895343	102894990	102895065	75	9	0	0																				2						2			1
chr10	102894743	102895343	102894991	102895066	75	1	8	0.888889
chr10	102894743	102895343	102894991	102895066	75	4	5	0.555556
chr10	102894743	102895343	102894991	102895066	75	9	0	0												1
chr10	102894743	102895343	102894992	102895067	75	5	3	0.375																																									1
chr10	102894743	102895343	102894992	102895067	75	5	4	0.444444
chr10	102894743	102895343	102894992	102895067	75	8	0	0
chr10	102894743	102895343	102894992	102895067	75	8	1	0.111111																															1
chr10	102894743	102895343	102894992	102895067	75	9	0	0					1				1	1							2														1						1
chr10	102894743	102895343	102894992	102895092	100	9	0	0																											3
chr10	102894743	102895343	102894993	102895068	75	0	9	1
chr10	102894743	102895343	102894993	102895068	75	7	2	0.222222
chr10	102894743	102895343	102894993	102895068	75	8	0	0																								1													1
chr10	102894743	102895343	102894993	102895068	75	9	0	0		1					1		3								1		3	1				3						2						1			1		1
chr10	102894743	102895343	102894994	102895069	75	0	9	1
chr10	102894743	102895343	102894994	102895069	75	5	4	0.444444
chr10	102894743	102895343	102894994	102895069	75	7	2	0.222222																																1
chr10	102894743	102895343	102894994	102895069	75	9	0	0															2		3			1										2										3
chr10	102894743	102895343	102894995	102895070	75	1	8	0.888889
chr10	102894743	102895343	102894995	102895070	75	6	3	0.333333																								1
chr10	102894743	102895343	102894995	102895070	75	8	1	0.111111
chr10	102894743	102895343	102894995	102895070	75	9	0	0					1	1				1															1					4					3		1			1	1
chr10	102894743	102895343	102894996	102895071	75	7	0	0
chr10	102894743	102895343	102894996	102895071	75	9	0	0			1						1						1				2						1							2				1		1
chr10	102894743	102895343	102894996	102895096	100	9	0	0								1
chr10	102894743	102895343	102894997	102895072	75	1	8	0.888889
chr10	102894743	102895343	102894997	102895072	75	9	0	0				1											1
chr10	102894743	102895343	102894998	102895073	75	6	3	0.333333																	2
chr10	102894743	102895343	102894998	102895073	75	8	0	0
chr10	102894743	102895343	102894998	102895073	75	9	0	0				2																				1										1
chr10	102894743	102895343	102894998	102895098	100	9	0	0																											3
chr10	102894743	102895343	102894999	102895074	75	3	6	0.666667
chr10	102894743	102895343	102894999	102895074	75	5	4	0.444444
chr10	102894743	102895343	102894999	102895074	75	8	1	0.111111
chr10	102894743	102895343	102894999	102895074	75	9	0	0	1			2	2	2	1								1		1	3						3		2												1			3
chr10	102894743	102895343	102895000	102895075	75	0	9	1
chr10	102894743	102895343	102895000	102895075	75	9	0	0				2																				1					1						1
chr10	102894743	102895343	102895001	102895076	75	1	8	0.888889
chr10	102894743	102895343	102895001	102895076	75	2	7	0.777778
chr10	102894743	102895343	102895001	102895076	75	9	0	0
chr10	102894743	102895343	102895002	102895077	75	9	0	0																	2							3					2							1	1
chr10	102894743	102895343	102895003	102895078	75	0	9	1
chr10	102894743	102895343	102895003	102895078	75	9	0	0									1									1												1						2
chr10	102894743	102895343	102895004	102895056	52	8	0	0
chr10	102894743	102895343	102895004	102895079	75	9	0	0																				1								1
chr10	102894743	102895343	102895005	102895080	75	0	9	1
chr10	102894743	102895343	102895005	102895080	75	9	0	0																1																				1
chr10	102894743	102895343	102895006	102895057	51	8	0	0
chr10	102894743	102895343	102895006	102895081	75	0	9	1
chr10	102894743	102895343	102895006	102895081	75	6	3	0.333333
chr10	102894743	102895343	102895006	102895081	75	7	1	0.125	1
chr10	102894743	102895343	102895006	102895081	75	8	0	0		1
chr10	102894743	102895343	102895006	102895081	75	8	1	0.111111			1
chr10	102894743	102895343	102895006	102895081	75	9	0	0					1											1				3			2	1																	1
chr10	102894743	102895343	102895007	102895070	63	9	0	0
chr10	102894743	102895343	102895007	102895082	75	9	0	0			2							1											4
chr10	102894743	102895343	102895007	102895107	100	10	0	0																											1
chr10	102894743	102895343	102895008	102895058	50	8	0	0
chr10	102894743	102895343	102895008	102895083	75	8	0	0																													2
chr10	102894743	102895343	102895008	102895083	75	8	1	0.111111
chr10	102894743	102895343	102895008	102895083	75	9	0	0																																								2
chr10	102894743	102895343	102895008	102895108	100	10	0	0											1											2					1
chr10	102894743	102895343	102895009	102895084	75	8	1	0.111111
chr10	102894743	102895343	102895009	102895084	75	9	0	0																					2
chr10	102894743	102895343	102895010	102895067	57	9	0	0																															1
chr10	102894743	102895343	102895010	102895085	75	9	0	0
chr10	102894743	102895343	102895010	102895110	100	9	0	0																											1
chr10	102894743	102895343	102895010	102895110	100	10	0	0								2
chr10	102894743	102895343	102895011	102895086	75	9	0	0				1
chr10	102894743	102895343	102895012	102895087	75	8	1	0.111111																				1
chr10	102894743	102895343	102895012	102895087	75	9	0	0										1										1	1																		1
chr10	102894743	102895343	102895013	102895058	45	8	0	0																													1
chr10	102894743	102895343	102895013	102895088	75	2	7	0.777778
chr10	102894743	102895343	102895013	102895088	75	7	1	0.125
chr10	102894743	102895343	102895013	102895088	75	9	0	0
chr10	102894743	102895343	102895014	102895089	75	1	8	0.888889
chr10	102894743	102895343	102895014	102895089	75	5	4	0.444444							2
chr10	102894743	102895343	102895014	102895089	75	9	0	0		1
chr10	102894743	102895343	102895015	102895090	75	9	0	0																														1
chr10	102894743	102895343	102895015	102895115	100	11	0	0								1
chr10	102894743	102895343	102895016	102895091	75	9	0	0
chr10	102894743	102895343	102895017	102895092	75	8	1	0.111111							1
chr10	102894743	102895343	102895017	102895117	100	9	0	0											1
chr10	102894743	102895343	102895019	102895094	75	0	8	1
chr10	102894743	102895343	102895019	102895094	75	8	0	0
chr10	102894743	102895343	102895020	102895120	100	9	0	0
chr10	102894743	102895343	102895022	102895080	58	7	0	0													1
chr10	102894743	102895343	102895022	102895097	75	1	6	0.857143
chr10	102894743	102895343	102895022	102895097	75	6	1	0.142857															1
chr10	102894743	102895343	102895023	102895098	75	6	0	0																																1
chr10	102894743	102895343	102895024	102895079	55	7	0	0
chr10	102894743	102895343	102895024	102895099	75	4	3	0.428571
chr10	102894743	102895343	102895024	102895099	75	6	1	0.142857
chr10	102894743	102895343	102895024	102895099	75	7	0	0																1
chr10	102894743	102895343	102895026	102895101	75	7	0	0															1
chr10	102894743	102895343	102895027	102895102	75	0	7	1
chr10	102894743	102895343	102895027	102895102	75	7	0	0				1
chr10	102894743	102895343	102895028	102895103	75	5	2	0.285714
chr10	102894743	102895343	102895028	102895103	75	7	0	0														1
chr10	102894743	102895343	102895028	102895128	100	9	0	0											2
chr10	102894743	102895343	102895030	102895105	75	0	7	1
chr10	102894743	102895343	102895030	102895105	75	6	0	0
chr10	102894743	102895343	102895030	102895105	75	6	1	0.142857					1
chr10	102894743	102895343	102895030	102895105	75	7	0	0						1										1		3								1									3
chr10	102894743	102895343	102895031	102895054	23	5	0	0
chr10	102894743	102895343	102895031	102895070	39	7	0	0
chr10	102894743	102895343	102895031	102895084	53	7	0	0																	2
chr10	102894743	102895343	102895031	102895094	63	7	0	0
chr10	102894743	102895343	102895031	102895106	75	0	7	1
chr10	102894743	102895343	102895031	102895106	75	7	0	0																	2								2						1	2
chr10	102894743	102895343	102895031	102895106	75	8	0	0
chr10	102894743	102895343	102895031	102895131	100	9	0	0											1
chr10	102894743	102895343	102895032	102895074	42	7	0	0																															1				4
chr10	102894743	102895343	102895032	102895091	59	6	0	0																	1
chr10	102894743	102895343	102895032	102895094	62	7	0	0																															1
chr10	102894743	102895343	102895032	102895107	75	0	7	1
chr10	102894743	102895343	102895032	102895107	75	0	8	1
chr10	102894743	102895343	102895032	102895107	75	4	4	0.5						1
chr10	102894743	102895343	102895032	102895107	75	6	0	0
chr10	102894743	102895343	102895032	102895107	75	7	0	0										1			1					1
chr10	102894743	102895343	102895032	102895107	75	8	0	0						1	2		1							1												3
chr10	102894743	102895343	102895032	102895107	75	9	0	0
chr10	102894743	102895343	102895032	102895112	80	8	0	0											1
chr10	102894743	102895343	102895033	102895108	75	0	8	1
chr10	102894743	102895343	102895033	102895108	75	8	0	0						1				1
chr10	102894743	102895343	102895034	102895109	75	7	0	0									1
chr10	102894743	102895343	102895034	102895109	75	8	0	0
chr10	102894743	102895343	102895036	102895080	44	6	0	0					1
chr10	102894743	102895343	102895036	102895111	75	7	0	0													1
chr10	102894743	102895343	102895037	102895112	75	4	3	0.428571
chr10	102894743	102895343	102895037	102895137	100	9	0	0																											1
chr10	102894743	102895343	102895038	102895113	75	6	0	0																																			1
chr10	102894743	102895343	102895038	102895113	75	7	0	0
chr10	102894743	102895343	102895039	102895114	75	7	0	0
chr10	102894743	102895343	102895039	102895114	75	8	0	0									1
chr10	102894743	102895343	102895040	102895115	75	0	8	1
chr10	102894743	102895343	102895040	102895115	75	7	0	0																														1
chr10	102894743	102895343	102895040	102895115	75	8	0	0					1
chr10	102894743	102895343	102895041	102895116	75	3	4	0.571429
chr10	102894743	102895343	102895041	102895116	75	6	0	0																																						1
chr10	102894743	102895343	102895041	102895116	75	6	1	0.142857																																1
chr10	102894743	102895343	102895042	102895117	75	7	0	0
chr10	102894743	102895343	102895043	102895118	75	5	2	0.285714
chr10	102894743	102895343	102895043	102895118	75	6	0	0									1														1									1
chr10	102894743	102895343	102895043	102895118	75	7	0	0
chr10	102894743	102895343	102895043	102895143	100	9	0	0																						1
chr10	102894743	102895343	102895044	102895119	75	0	6	1
chr10	102894743	102895343	102895044	102895119	75	5	0	0				1
chr10	102894743	102895343	102895046	102895121	75	6	0	0
chr10	102894743	102895343	102895046	102895146	100	8	0	0
chr10	102894743	102895343	102895047	102895122	75	4	0	0
chr10	102894743	102895343	102895047	102895122	75	5	0	0
chr10	102894743	102895343	102895048	102895123	75	1	4	0.8
chr10	102894743	102895343	102895048	102895123	75	4	0	0																								1
chr10	102894743	102895343	102895048	102895123	75	5	0	0
chr10	102894743	102895343	102895049	102895124	75	4	0	0
chr10	102894743	102895343	102895050	102895125	75	3	0	0
chr10	102894743	102895343	102895051	102895126	75	3	0	0				1
chr10	102894743	102895343	102895051	102895126	75	3	1	0.25
chr10	102894743	102895343	102895054	102895129	75	2	2	0.5
chr10	102894743	102895343	102895055	102895130	75	3	0	0
chr10	102894743	102895343	102895056	102895131	75	1	2	0.666667	1
chr10	102894743	102895343	102895056	102895131	75	2	0	0																									1
chr10	102894743	102895343	102895056	102895131	75	3	0	0				1					1			1													1
chr10	102894743	102895343	102895057	102895132	75	2	0	0																		1										2
chr10	102894743	102895343	102895057	102895132	75	3	0	0														1
chr10	102894743	102895343	102895058	102895112	54	2	0	0
chr10	102894743	102895343	102895058	102895133	75	3	0	0																																				1
chr10	102894743	102895343	102895059	102895134	75	2	1	0.333333
chr10	102894743	102895343	102895060	102895135	75	3	0	0										1
chr10	102894743	102895343	102895061	102895136	75	3	0	0																			1
chr10	102894743	102895343	102895062	102895137	75	3	0	0
chr10	102894743	102895343	102895063	102895138	75	2	0	0				1																			1
chr10	102894743	102895343	102895063	102895138	75	2	1	0.333333																																									1
chr10	102894743	102895343	102895064	102895139	75	1	2	0.666667
chr10	102894743	102895343	102895064	102895139	75	3	0	0
chr10	102894743	102895343	102895065	102895140	75	1	3	0.75
chr10	102894743	102895343	102895065	102895140	75	4	0	0		1
chr10	102894743	102895343	102895066	102895141	75	3	0	0
chr10	102894743	102895343	102895066	102895141	75	4	0	0																			1		2
chr10	102894743	102895343	102895067	102895142	75	2	1	0.333333
chr10	102894743	102895343	102895067	102895142	75	3	0	0
chr10	102894743	102895343	102895068	102895143	75	0	4	1
chr10	102894743	102895343	102895068	102895143	75	2	2	0.5
chr10	102894743	102895343	102895068	102895143	75	3	0	0
chr10	102894743	102895343	102895068	102895143	75	4	0	0
chr10	102894743	102895343	102895070	102895145	75	3	0	0																																2
chr10	102894743	102895343	102895072	102895147	75	3	0	0																					2
chr10	102894743	102895343	102895072	102895172	100	5	0	0
chr10	102894743	102895343	102895073	102895148	75	0	4	1
chr10	102894743	102895343	102895073	102895148	75	3	0	0												1
chr10	102894743	102895343	102895073	102895148	75	4	0	0
chr10	102894743	102895343	102895074	102895149	75	3	0	0													1		1
chr10	102894743	102895343	102895074	102895149	75	4	0	0
chr10	102894743	102895343	102895075	102895117	42	2	0	0
chr10	102894743	102895343	102895075	102895125	50	1	0	0
chr10	102894743	102895343	102895075	102895150	75	1	3	0.75																															1
chr10	102894743	102895343	102895075	102895150	75	3	0	0	1			1																	3										1							1
chr10	102894743	102895343	102895075	102895150	75	4	0	0							3		1
chr10	102894743	102895343	102895075	102895175	100	4	0	0																						1
chr10	102894743	102895343	102895075	102895175	100	5	0	0																						1
chr10	102894743	102895343	102895076	102895151	75	2	1	0.333333
chr10	102894743	102895343	102895076	102895151	75	3	0	0			1
chr10	102894743	102895343	102895076	102895151	75	4	0	0																																		1
chr10	102894743	102895343	102895076	102895176	100	5	0	0											1
chr10	102894743	102895343	102895079	102895154	75	0	4	1
chr10	102894743	102895343	102895079	102895154	75	3	0	0									1
chr10	102894743	102895343	102895080	102895155	75	2	2	0.5																		1
chr10	102894743	102895343	102895080	102895155	75	3	0	0
chr10	102894743	102895343	102895081	102895156	75	4	0	0
chr10	102894743	102895343	102895082	102895182	100	4	0	0								3
chr10	102894743	102895343	102895083	102895158	75	3	0	0																										1
chr10	102894743	102895343	102895084	102895159	75	2	2	0.5
chr10	102894743	102895343	102895084	102895159	75	3	0	0																																			1
chr10	102894743	102895343	102895084	102895159	75	4	0	0
chr10	102894743	102895343	102895085	102895160	75	1	2	0.666667															1
chr10	102894743	102895343	102895085	102895160	75	1	3	0.75
chr10	102894743	102895343	102895085	102895160	75	3	0	0				1																					1						1									1
chr10	102894743	102895343	102895085	102895160	75	4	0	0																	1																							1
chr10	102894743	102895343	102895085	102895185	100	4	0	0								1
chr10	102894743	102895343	102895087	102895162	75	4	0	0
chr10	102894743	102895343	102895090	102895165	75	3	1	0.25
chr10	102894743	102895343	102895090	102895165	75	4	0	0
chr10	102894743	102895343	102895090	102895190	100	5	0	0																						1
chr10	102894743	102895343	102895091	102895152	61	4	0	0								1
chr10	102894743	102895343	102895091	102895166	75	2	2	0.5
chr10	102894743	102895343	102895091	102895166	75	3	0	0							1			1																							1
chr10	102894743	102895343	102895091	102895166	75	3	1	0.25																							1
chr10	102894743	102895343	102895091	102895166	75	4	0	0
chr10	102894743	102895343	102895091	102895191	100	6	0	0								1
chr10	102894743	102895343	102895092	102895167	75	3	0	0									1																								1
chr10	102894743	102895343	102895092	102895167	75	4	0	0																									1
chr10	102894743	102895343	102895092	102895192	100	6	0	0																						1
chr10	102894743	102895343	102895093	102895168	75	4	0	0
chr10	102894743	102895343	102895093	102895168	75	5	0	0																														1		1
chr10	102894743	102895343	102895094	102895169	75	1	4	0.8									1
chr10	102894743	102895343	102895094	102895169	75	4	0	0																															1
chr10	102894743	102895343	102895094	102895169	75	5	0	0																		1	5
chr10	102894743	102895343	102895095	102895170	75	5	0	0		1																																					1	2
chr10	102894743	102895343	102895095	102895195	100	6	0	0
chr10	102894743	102895343	102895096	102895171	75	5	0	0																										1															1
chr10	102894743	102895343	102895097	102895172	75	0	5	1
chr10	102894743	102895343	102895097	102895172	75	4	1	0.2
chr10	102894743	102895343	102895097	102895172	75	5	0	0
chr10	102894743	102895343	102895097	102895197	100	6	0	0																											1
chr10	102894743	102895343	102895098	102895173	75	0	5	1
chr10	102894743	102895343	102895098	102895173	75	5	0	0						1																	1
chr10	102894743	102895343	102895100	102895175	75	3	2	0.4
chr10	102894743	102895343	102895100	102895175	75	4	1	0.2
chr10	102894743	102895343	102895100	102895175	75	5	0	0	1	1	1	2			1																									1
chr10	102894743	102895343	102895100	102895200	100	6	0	0																											1
chr10	102894743	102895343	102895101	102895176	75	2	3	0.6																		1
chr10	102894743	102895343	102895101	102895176	75	4	1	0.2															1
chr10	102894743	102895343	102895101	102895176	75	5	0	0				1																															1				1		1
chr10	102894743	102895343	102895101	102895201	100	6	0	0																						1
chr10	102894743	102895343	102895102	102895177	75	2	3	0.6
chr10	102894743	102895343	102895102	102895177	75	4	1	0.2
chr10	102894743	102895343	102895102	102895177	75	5	0	0							1
chr10	102894743	102895343	102895102	102895202	100	6	0	0																											2
chr10	102894743	102895343	102895103	102895178	75	4	0	0
chr10	102894743	102895343	102895103	102895178	75	5	0	0		1																3		1				1	2							1					1
chr10	102894743	102895343	102895104	102895179	75	5	0	0														1																		1
chr10	102894743	102895343	102895104	102895204	100	6	0	0											1
chr10	102894743	102895343	102895105	102895180	75	4	1	0.2
chr10	102894743	102895343	102895105	102895180	75	5	0	0
chr10	102894743	102895343	102895106	102895181	75	0	5	1
chr10	102894743	102895343	102895106	102895181	75	4	1	0.2	1																													1
chr10	102894743	102895343	102895106	102895181	75	5	0	0																																						1
chr10	102894743	102895343	102895106	102895206	100	6	0	0																						1
chr10	102894743	102895343	102895108	102895183	75	0	4	1
chr10	102894743	102895343	102895109	102895184	75	0	4	1
chr10	102894743	102895343	102895109	102895184	75	3	1	0.25
chr10	102894743	102895343	102895109	102895184	75	4	0	0		1			1								2	1																							1
chr10	102894743	102895343	102895109	102895209	100	5	0	0								1
chr10	102894743	102895343	102895110	102895185	75	4	0	0			1	5													2
chr10	102894743	102895343	102895111	102895186	75	4	0	0		1
chr10	102894743	102895343	102895112	102895165	53	3	0	0																							1
chr10	102894743	102895343	102895112	102895187	75	1	3	0.75													1
chr10	102894743	102895343	102895112	102895187	75	4	0	0			1			1	1			1					1				1					2
chr10	102894743	102895343	102895113	102895188	75	1	2	0.666667
chr10	102894743	102895343	102895113	102895188	75	3	0	0				1
chr10	102894743	102895343	102895114	102895189	75	3	0	0					2																									2
chr10	102894743	102895343	102895114	102895214	100	5	0	0								3														1
chr10	102894743	102895343	102895115	102895190	75	3	0	0																																2
chr10	102894743	102895343	102895115	102895215	100	5	0	0																						1
chr10	102894743	102895343	102895116	102895191	75	0	4	1
chr10	102894743	102895343	102895116	102895191	75	3	0	0
chr10	102894743	102895343	102895117	102895192	75	4	0	0
chr10	102894743	102895343	102895117	102895217	100	5	0	0								1
chr10	102894743	102895343	102895118	102895193	75	4	0	0										1
chr10	102894743	102895343	102895119	102895194	75	4	0	0
chr10	102894743	102895343	102895120	102895195	75	2	2	0.5
chr10	102894743	102895343	102895120	102895195	75	4	0	0					1
chr10	102894743	102895343	102895121	102895196	75	0	4	1
chr10	102894743	102895343	102895121	102895196	75	2	1	0.333333
chr10	102894743	102895343	102895121	102895196	75	4	0	0				1																																				1
chr10	102894743	102895343	102895122	102895197	75	2	2	0.5	1
chr10	102894743	102895343	102895122	102895197	75	4	0	0				2						2			1	1				7					3						2		1	1							1		1
chr10	102894743	102895343	102895122	102895222	100	5	0	0											1																1
chr10	102894743	102895343	102895123	102895162	39	0	2	1																													2
chr10	102894743	102895343	102895123	102895182	59	3	0	0
chr10	102894743	102895343	102895123	102895198	75	3	1	0.25					1
chr10	102894743	102895343	102895123	102895198	75	4	0	0				1		1				2				1	1	6										2				2							1
chr10	102894743	102895343	102895123	102895223	100	5	0	0								2																			1
chr10	102894743	102895343	102895124	102895183	59	3	0	0
chr10	102894743	102895343	102895124	102895199	75	4	0	0														1																		1								1
chr10	102894743	102895343	102895124	102895224	100	5	0	0																											2
chr10	102894743	102895343	102895125	102895200	75	4	0	0				1		1																		1						1
chr10	102894743	102895343	102895126	102895201	75	3	1	0.25																				2										3
chr10	102894743	102895343	102895126	102895201	75	4	0	0					1																																				1
chr10	102894743	102895343	102895127	102895202	75	4	0	0
chr10	102894743	102895343	102895129	102895204	75	4	0	0
chr10	102894743	102895343	102895130	102895205	75	4	0	0
chr10	102894743	102895343	102895131	102895206	75	4	0	0																																					1
chr10	102894743	102895343	102895132	102895207	75	0	4	1
chr10	102894743	102895343	102895132	102895207	75	1	3	0.75
chr10	102894743	102895343	102895132	102895207	75	3	1	0.25									1
chr10	102894743	102895343	102895132	102895207	75	4	0	0					1		1			1				1					1		5		1									2				1	1
chr10	102894743	102895343	102895133	102895183	50	3	0	0												1
chr10	102894743	102895343	102895133	102895208	75	0	4	1									2
chr10	102894743	102895343	102895133	102895208	75	2	2	0.5
chr10	102894743	102895343	102895133	102895208	75	3	1	0.25																																									1
chr10	102894743	102895343	102895133	102895208	75	4	0	0																							3											1					2
chr10	102894743	102895343	102895134	102895209	75	1	2	0.666667
chr10	102894743	102895343	102895134	102895209	75	3	0	0				1																												1
chr10	102894743	102895343	102895135	102895210	75	0	3	1
chr10	102894743	102895343	102895135	102895210	75	3	0	0						1								1		1																1
chr10	102894743	102895343	102895135	102895235	100	5	0	0											1
chr10	102894743	102895343	102895136	102895211	75	3	0	0																					1
chr10	102894743	102895343	102895137	102895212	75	3	0	0									2
chr10	102894743	102895343	102895137	102895237	100	5	0	0																						1
chr10	102894743	102895343	102895138	102895213	75	3	0	0														1										2
chr10	102894743	102895343	102895138	102895238	100	5	0	0																						2
chr10	102894743	102895343	102895139	102895214	75	0	4	1
chr10	102894743	102895343	102895139	102895214	75	2	2	0.5
chr10	102894743	102895343	102895139	102895214	75	3	1	0.25
chr10	102894743	102895343	102895139	102895214	75	4	0	0			2													1			4																		1
chr10	102894743	102895343	102895139	102895239	100	5	0	0																						1
chr10	102894743	102895343	102895140	102895215	75	0	3	1									1
chr10	102894743	102895343	102895140	102895228	88	3	0	0								1
chr10	102894743	102895343	102895141	102895216	75	3	0	0
chr10	102894743	102895343	102895142	102895217	75	1	2	0.666667
chr10	102894743	102895343	102895142	102895217	75	2	1	0.333333
chr10	102894743	102895343	102895142	102895217	75	3	0	0																				2	1			2
chr10	102894743	102895343	102895142	102895242	100	4	0	0																											1
chr10	102894743	102895343	102895143	102895218	75	3	0	0									1
chr10	102894743	102895343	102895143	102895243	100	4	0	0								1
chr10	102894743	102895343	102895144	102895219	75	3	0	0																																						1
chr10	102894743	102895343	102895145	102895220	75	0	3	1
chr10	102894743	102895343	102895145	102895220	75	3	0	0					1											1
chr10	102894743	102895343	102895145	102895245	100	4	0	0																						1
chr10	102894743	102895343	102895147	102895222	75	0	3	1
chr10	102894743	102895343	102895147	102895222	75	3	0	0																	1
chr10	102894743	102895343	102895147	102895247	100	4	0	0																						1
chr10	102894743	102895343	102895149	102895224	75	2	1	0.333333
chr10	102894743	102895343	102895149	102895224	75	3	0	0																																						1
chr10	102894743	102895343	102895150	102895225	75	2	0	0
chr10	102894743	102895343	102895150	102895225	75	3	0	0
chr10	102894743	102895343	102895151	102895226	75	2	1	0.333333
chr10	102894743	102895343	102895151	102895226	75	3	0	0
chr10	102894743	102895343	102895151	102895251	100	4	0	0								1
chr10	102894743	102895343	102895152	102895227	75	2	1	0.333333
chr10	102894743	102895343	102895152	102895227	75	3	0	0
chr10	102894743	102895343	102895152	102895252	100	4	0	0								1			1
chr10	102894743	102895343	102895153	102895228	75	3	0	0
chr10	102894743	102895343	102895154	102895229	75	3	0	0
chr10	102894743	102895343	102895155	102895230	75	0	3	1
chr10	102894743	102895343	102895155	102895230	75	3	0	0												1																									2
chr10	102894743	102895343	102895156	102895231	75	0	3	1
chr10	102894743	102895343	102895156	102895231	75	3	0	0
chr10	102894743	102895343	102895158	102895233	75	4	0	0
chr10	102894743	102895343	102895159	102895234	75	4	0	0			1
chr10	102894743	102895343	102895160	102895235	75	4	0	0																							1
chr10	102894743	102895343	102895160	102895260	100	5	0	0																						1
chr10	102894743	102895343	102895162	102895237	75	4	0	0																					1
chr10	102894743	102895343	102895163	102895238	75	4	0	0														1																									1
chr10	102894743	102895343	102895164	102895239	75	4	0	0						1			2									2																1
chr10	102894743	102895343	102895164	102895264	100	5	0	0																						1
chr10	102894743	102895343	102895165	102895240	75	4	0	0										1																					1					2
chr10	102894743	102895343	102895165	102895265	100	5	0	0																						1
chr10	102894743	102895343	102895166	102895241	75	3	1	0.25
chr10	102894743	102895343	102895166	102895241	75	4	0	0																								1
chr10	102894743	102895343	102895167	102895242	75	3	0	0																													1					1
chr10	102894743	102895343	102895167	102895242	75	3	1	0.25																																								1
chr10	102894743	102895343	102895167	102895242	75	4	0	0																	1																								1
chr10	102894743	102895343	102895168	102895243	75	2	1	0.333333
chr10	102894743	102895343	102895168	102895243	75	3	1	0.25															1
chr10	102894743	102895343	102895168	102895243	75	4	0	0
chr10	102894743	102895343	102895168	102895268	100	5	0	0								1
chr10	102894743	102895343	102895170	102895270	100	4	0	0																											2
chr10	102894743	102895343	102895171	102895246	75	3	0	0																																							1
chr10	102894743	102895343	102895172	102895247	75	3	0	0																					1
chr10	102894743	102895343	102895173	102895248	75	2	1	0.333333							2
chr10	102894743	102895343	102895173	102895248	75	3	0	0																																2
chr10	102894743	102895343	102895173	102895273	100	4	0	0								1
chr10	102894743	102895343	102895174	102895249	75	1	2	0.666667																1
chr10	102894743	102895343	102895174	102895249	75	2	1	0.333333																													1
chr10	102894743	102895343	102895174	102895249	75	3	0	0													2				4													2
chr10	102894743	102895343	102895174	102895274	100	4	0	0																						1
chr10	102894743	102895343	102895175	102895250	75	0	3	1
chr10	102894743	102895343	102895175	102895250	75	2	0	0
chr10	102894743	102895343	102895175	102895250	75	2	1	0.333333																				1
chr10	102894743	102895343	102895175	102895250	75	3	0	0		1											1		1				1	1	1		1															1	1
chr10	102894743	102895343	102895175	102895275	100	4	0	0								1
chr10	102894743	102895343	102895176	102895251	75	3	0	0																																			1		1				1
chr10	102894743	102895343	102895177	102895252	75	3	0	0					1							1																												2
chr10	102894743	102895343	102895178	102895253	75	0	3	1
chr10	102894743	102895343	102895178	102895253	75	2	1	0.333333																				1
chr10	102894743	102895343	102895178	102895253	75	3	0	0																		1			1																				1
chr10	102894743	102895343	102895178	102895278	100	5	0	0																						1
chr10	102894743	102895343	102895179	102895254	75	3	0	0															1
chr10	102894743	102895343	102895180	102895255	75	0	3	1
chr10	102894743	102895343	102895180	102895255	75	3	0	0
chr10	102894743	102895343	102895181	102895256	75	3	0	0																	1
chr10	102894743	102895343	102895182	102895257	75	0	3	1
chr10	102894743	102895343	102895182	102895257	75	1	2	0.666667
chr10	102894743	102895343	102895182	102895257	75	3	0	0			1
chr10	102894743	102895343	102895183	102895258	75	0	4	1
chr10	102894743	102895343	102895183	102895258	75	3	0	0
chr10	102894743	102895343	102895183	102895258	75	4	0	0													1
chr10	102894743	102895343	102895184	102895259	75	4	0	0																							1
chr10	102894743	102895343	102895185	102895260	75	2	2	0.5
chr10	102894743	102895343	102895185	102895260	75	3	0	0														1
chr10	102894743	102895343	102895185	102895260	75	3	1	0.25
chr10	102894743	102895343	102895185	102895260	75	4	0	0																							1									1
chr10	102894743	102895343	102895186	102895261	75	0	4	1
chr10	102894743	102895343	102895186	102895261	75	3	1	0.25
chr10	102894743	102895343	102895186	102895261	75	4	0	0																																1
chr10	102894743	102895343	102895187	102895262	75	3	1	0.25																																									1
chr10	102894743	102895343	102895187	102895262	75	4	0	0															2
chr10	102894743	102895343	102895187	102895287	100	4	0	0
chr10	102894743	102895343	102895187	102895287	100	5	0	0
chr10	102894743	102895343	102895188	102895263	75	0	4	1
chr10	102894743	102895343	102895188	102895263	75	4	0	0
chr10	102894743	102895343	102895189	102895264	75	4	0	0
chr10	102894743	102895343	102895190	102895265	75	4	0	0															1
chr10	102894743	102895343	102895191	102895266	75	0	3	1
chr10	102894743	102895343	102895191	102895266	75	3	0	0
chr10	102894743	102895343	102895191	102895266	75	4	0	0
chr10	102894743	102895343	102895192	102895254	62	1	1	0.5																		2
chr10	102894743	102895343	102895192	102895267	75	3	0	0														1
chr10	102894743	102895343	102895192	102895292	100	4	0	0											3
chr10	102894743	102895343	102895193	102895268	75	2	1	0.333333
chr10	102894743	102895343	102895193	102895268	75	3	0	0					1										1					1				1
chr10	102894743	102895343	102895194	102895269	75	3	0	0																															1
chr10	102894743	102895343	102895195	102895244	49	2	0	0											1
chr10	102894743	102895343	102895195	102895270	75	1	2	0.666667
chr10	102894743	102895343	102895195	102895270	75	2	0	0															1																										1
chr10	102894743	102895343	102895195	102895270	75	2	1	0.333333
chr10	102894743	102895343	102895195	102895270	75	3	0	0			2			1													1					2												2					1
chr10	102894743	102895343	102895196	102895271	75	0	3	1
chr10	102894743	102895343	102895196	102895271	75	2	1	0.333333																																					1
chr10	102894743	102895343	102895196	102895271	75	3	0	0						1			2																														1
chr10	102894743	102895343	102895197	102895272	75	3	0	0
chr10	102894743	102895343	102895198	102895273	75	0	3	1
chr10	102894743	102895343	102895198	102895273	75	2	1	0.333333																																				1
chr10	102894743	102895343	102895198	102895273	75	3	0	0
chr10	102894743	102895343	102895198	102895298	100	4	0	0																											1
chr10	102894743	102895343	102895199	102895274	75	3	0	0																					2
chr10	102894743	102895343	102895200	102895275	75	3	0	0																				4
chr10	102894743	102895343	102895200	102895300	100	4	0	0								1
chr10	102894743	102895343	102895201	102895276	75	2	2	0.5
chr10	102894743	102895343	102895201	102895276	75	3	0	0																																		1
chr10	102894743	102895343	102895201	102895276	75	3	1	0.25
chr10	102894743	102895343	102895201	102895276	75	4	0	0
chr10	102894743	102895343	102895202	102895277	75	4	0	0
chr10	102894743	102895343	102895202	102895302	100	4	0	0								2
chr10	102894743	102895343	102895203	102895247	44	2	0	0													1
chr10	102894743	102895343	102895203	102895278	75	1	3	0.75
chr10	102894743	102895343	102895203	102895278	75	2	2	0.5
chr10	102894743	102895343	102895203	102895278	75	3	1	0.25															1
chr10	102894743	102895343	102895204	102895279	75	0	4	1
chr10	102894743	102895343	102895204	102895279	75	4	0	0
chr10	102894743	102895343	102895205	102895280	75	4	0	0																				4																				4	1
chr10	102894743	102895343	102895205	102895305	100	3	1	0.25																						1
chr10	102894743	102895343	102895206	102895281	75	3	1	0.25																		3
chr10	102894743	102895343	102895206	102895281	75	4	0	0																		1
chr10	102894743	102895343	102895207	102895282	75	0	4	1
chr10	102894743	102895343	102895207	102895282	75	4	0	0
chr10	102894743	102895343	102895208	102895283	75	3	1	0.25						1
chr10	102894743	102895343	102895208	102895283	75	4	0	0						1
chr10	102894743	102895343	102895209	102895284	75	1	3	0.75
chr10	102894743	102895343	102895209	102895284	75	3	1	0.25
chr10	102894743	102895343	102895209	102895284	75	4	0	0									1																												1
chr10	102894743	102895343	102895209	102895309	100	4	0	0																						3
chr10	102894743	102895343	102895211	102895271	60	3	0	0																																					1
chr10	102894743	102895343	102895211	102895286	75	1	3	0.75
chr10	102894743	102895343	102895211	102895286	75	3	1	0.25
chr10	102894743	102895343	102895211	102895286	75	4	0	0																1																			2
chr10	102894743	102895343	102895211	102895311	100	4	0	0								1
chr10	102894743	102895343	102895212	102895287	75	4	0	0		1
chr10	102894743	102895343	102895213	102895288	75	0	4	1
chr10	102894743	102895343	102895213	102895288	75	2	2	0.5
chr10	102894743	102895343	102895213	102895288	75	3	1	0.25																								1
chr10	102894743	102895343	102895213	102895288	75	4	0	0																																					1
chr10	102894743	102895343	102895214	102895289	75	0	3	1
chr10	102894743	102895343	102895214	102895289	75	3	0	0									1																												2
chr10	102894743	102895343	102895214	102895289	75	4	0	0												1
chr10	102894743	102895343	102895214	102895314	100	3	0	0											1
chr10	102894743	102895343	102895214	102895314	100	4	0	0																											2
chr10	102894743	102895343	102895215	102895290	75	3	0	0																																								2
chr10	102894743	102895343	102895215	102895315	100	3	0	0																											2
chr10	102894743	102895343	102895216	102895268	52	2	0	0								1
chr10	102894743	102895343	102895216	102895291	75	0	3	1
chr10	102894743	102895343	102895216	102895291	75	2	1	0.333333														1
chr10	102894743	102895343	102895216	102895291	75	3	0	0																																				1		2			3
chr10	102894743	102895343	102895217	102895292	75	1	2	0.666667
chr10	102894743	102895343	102895217	102895292	75	2	1	0.333333
chr10	102894743	102895343	102895217	102895292	75	3	0	0				1
chr10	102894743	102895343	102895218	102895293	75	0	3	1
chr10	102894743	102895343	102895218	102895293	75	3	0	0																																2
chr10	102894743	102895343	102895219	102895267	48	2	0	0													1
chr10	102894743	102895343	102895219	102895294	75	1	2	0.666667															1
chr10	102894743	102895343	102895219	102895294	75	3	0	0					1												2																							2
chr10	102894743	102895343	102895220	102895295	75	2	1	0.333333
chr10	102894743	102895343	102895220	102895295	75	3	0	0																	1
chr10	102894743	102895343	102895221	102895296	75	3	0	0																																						1
chr10	102894743	102895343	102895222	102895297	75	3	0	0																				1				4
chr10	102894743	102895343	102895222	102895322	100	3	0	0																						1
chr10	102894743	102895343	102895223	102895298	75	1	2	0.666667
chr10	102894743	102895343	102895223	102895298	75	2	1	0.333333		1
chr10	102894743	102895343	102895223	102895298	75	3	0	0					1								1			1
chr10	102894743	102895343	102895224	102895299	75	2	1	0.333333
chr10	102894743	102895343	102895224	102895299	75	3	0	0					1																		1													1
chr10	102894743	102895343	102895225	102895300	75	3	0	0
chr10	102894743	102895343	102895226	102895301	75	2	1	0.333333																																		1
chr10	102894743	102895343	102895226	102895301	75	3	0	0	1			1										1	1													1				1									1
chr10	102894743	102895343	102895226	102895326	100	3	0	0								1
chr10	102894743	102895343	102895227	102895302	75	3	0	0									2															1	1						2
chr10	102894743	102895343	102895227	102895327	100	3	0	0																											1
chr10	102894743	102895343	102895228	102895303	75	3	0	0																																									1
chr10	102894743	102895343	102895229	102895304	75	3	0	0				1														1
chr10	102894743	102895343	102895230	102895305	75	2	0	0																																				1
chr10	102894743	102895343	102895230	102895305	75	3	0	0																														2
chr10	102894743	102895343	102895231	102895306	75	1	2	0.666667
chr10	102894743	102895343	102895231	102895306	75	3	0	0					1
chr10	102894743	102895343	102895232	102895307	75	0	2	1
chr10	102894743	102895343	102895232	102895307	75	2	0	0																	1																				1
chr10	102894743	102895343	102895232	102895307	75	3	0	0				1																	2																				1
chr10	102894743	102895343	102895233	102895308	75	0	2	1
chr10	102894743	102895343	102895233	102895308	75	2	0	0													2		2																	2			2						1
chr10	102894743	102895343	102895234	102895309	75	1	1	0.5
chr10	102894743	102895343	102895234	102895309	75	2	0	0																																1					1		1
chr10	102894743	102895343	102895235	102895282	47	2	0	0				1
chr10	102894743	102895343	102895235	102895286	51	2	0	0																																		1
chr10	102894743	102895343	102895235	102895310	75	1	1	0.5					1							2
chr10	102894743	102895343	102895235	102895310	75	2	0	0	1															1	2											1													1
chr10	102894743	102895343	102895236	102895311	75	2	0	0												1																			1
chr10	102894743	102895343	102895236	102895336	100	2	0	0																											1
chr10	102894743	102895343	102895237	102895312	75	0	2	1
chr10	102894743	102895343	102895237	102895312	75	1	1	0.5
chr10	102894743	102895343	102895237	102895312	75	2	0	0			1						1							1
chr10	102894743	102895343	102895238	102895313	75	0	2	1
chr10	102894743	102895343	102895238	102895313	75	1	1	0.5																		1
chr10	102894743	102895343	102895238	102895313	75	2	0	0																2																			1
chr10	102894743	102895343	102895238	102895338	100	2	0	0											1
chr10	102894743	102895343	102895239	102895314	75	0	2	1
chr10	102894743	102895343	102895239	102895314	75	2	0	0
chr10	102894743	102895343	102895239	102895339	100	2	0	0
chr10	102894743	102895343	102895240	102895315	75	2	0	0						1			1			1														1										1
chr10	102894743	102895343	102895241	102895316	75	0	2	1
chr10	102894743	102895343	102895241	102895316	75	1	1	0.5
chr10	102894743	102895343	102895241	102895316	75	2	0	0																								1				1
chr10	102894743	102895343	102895242	102895317	75	2	0	0																							1
chr10	102894743	102895343	102895243	102895318	75	2	0	0										2		1
chr10	102894743	102895343	102895244	102895319	75	2	0	0																										1							1
chr10	102894743	102895343	102895245	102895320	75	2	0	0				1											1						1
chr10	102894743	102895343	102895246	102895321	75	0	2	1
chr10	102894743	102895343	102895246	102895321	75	2	0	0
chr10	102894743	102895343	102895247	102895322	75	0	2	1
chr10	102894743	102895343	102895247	102895322	75	2	0	0
chr10	102894743	102895343	102895247	102895347	100	2	0	0																						2
chr10	102894743	102895343	102895248	102895323	75	1	1	0.5																																								1
chr10	102894743	102895343	102895248	102895323	75	2	0	0										1			2								1
chr10	102894743	102895343	102895249	102895324	75	2	0	0																																2
chr10	102894743	102895343	102895250	102895325	75	2	0	0						1								1
chr10	102894743	102895343	102895251	102895326	75	1	1	0.5																	1
chr10	102894743	102895343	102895251	102895326	75	2	0	0					1																																1
chr10	102894743	102895343	102895251	102895333	82	2	0	0																											1
chr10	102894743	102895343	102895252	102895327	75	0	2	1
chr10	102894743	102895343	102895252	102895327	75	2	0	0										1
chr10	102894743	102895343	102895253	102895328	75	1	1	0.5
chr10	102894743	102895343	102895253	102895328	75	2	0	0																												2
chr10	102894743	102895343	102895254	102895329	75	0	2	1
chr10	102894743	102895343	102895254	102895329	75	2	0	0				1					2						1		2																							4
chr10	102894743	102895343	102895254	102895354	100	1	1	0.5																											2
chr10	102894743	102895343	102895254	102895354	100	2	0	0																											1
chr10	102894743	102895343	102895255	102895330	75	2	0	0
chr10	102894743	102895343	102895256	102895331	75	0	2	1
chr10	102894743	102895343	102895256	102895331	75	2	0	0															1
chr10	102894743	102895343	102895257	102895332	75	0	2	1
chr10	102894743	102895343	102895257	102895332	75	1	1	0.5												1			1																	1								2
chr10	102894743	102895343	102895257	102895332	75	2	0	0		1			1				1	6									3					4				1	4	1		1	1		1
chr10	102894743	102895343	102895258	102895333	75	0	1	1												1
chr10	102894743	102895343	102895258	102895333	75	1	0	0																	1									2						1
chr10	102894743	102895343	102895258	102895333	75	2	0	0
chr10	102894743	102895343	102895259	102895334	75	1	0	0		1							2					1	1						1									1
chr10	102894743	102895343	102895259	102895359	100	1	0	0											1
chr10	102894743	102895343	102895260	102895335	75	0	1	1
chr10	102894743	102895343	102895260	102895335	75	1	0	0																		1
chr10	102894743	102895343	102895260	102895360	100	1	0	0											1
chr10	102894743	102895343	102895262	102895337	75	1	0	0
chr10	102894743	102895343	102895263	102895338	75	0	1	1
chr10	102894743	102895343	102895263	102895338	75	1	0	0												1
chr10	102894743	102895343	102895264	102895339	75	0	1	1
chr10	102894743	102895343	102895264	102895339	75	1	0	0				1																												1
chr10	102894743	102895343	102895265	102895340	75	0	1	1										1																			2					1
chr10	102894743	102895343	102895265	102895340	75	1	0	0										3		2																							2				1	4
chr10	102894743	102895343	102895265	102895365	100	1	0	0								1														1					4
chr10	102894743	102895343	102895266	102895341	75	0	1	1
chr10	102894743	102895343	102895266	102895341	75	1	0	0					1	1							1					1	1										2	1	1					2		2
chr10	102894743	102895343	102895267	102895295	28	1	0	0
chr10	102894743	102895343	102895267	102895342	75	0	1	1																																							1
chr10	102894743	102895343	102895267	102895342	75	1	0	0			1										1							1												1
chr10	102894743	102895343	102895268	102895343	75	0	1	1																														2
chr10	102894743	102895343	102895268	102895343	75	1	0	0																										1
chr10	102894743	102895343	102895270	102895345	75	1	0	0																			1				1
chr10	102894743	102895343	102895270	102895370	100	1	0	0																											2
chr10	102894743	102895343	102895271	102895346	75	0	1	1
chr10	102894743	102895343	102895271	102895346	75	1	0	0					1
chr10	102894743	102895343	102895271	102895371	100	1	0	0											2																3
chr10	102894743	102895343	102895272	102895347	75	0	1	1
chr10	102894743	102895343	102895272	102895347	75	1	0	0				2		1	2			1						1	2	1		5									3
chr10	102894743	102895343	102895273	102895348	75	0	1	1
chr10	102894743	102895343	102895273	102895348	75	1	0	0																		1							1
chr10	102894743	102895343	102895274	102895349	75	0	1	1																			1
chr10	102894743	102895343	102895274	102895349	75	1	0	0		1		2	2		3		1	2			2										4							2	1					2	2		1		1
chr10	102894743	102895343	102895274	102895374	100	1	0	0								6			4											3
chr10	102894743	102895343	102895275	102895350	75	1	0	0		1
chr10	102894743	102895343	102895275	102895375	100	0	1	1																											2
chr10	102894743	102895343	102895276	102895351	75	1	0	0
chr10	102894743	102895343	102895334	102895434	100	1	0	0																											1
chr10	102894743	102895343	102895335	102895435	100	1	0	0								1
chr10	102894743	102895343	102895336	102895436	100	1	0	0								1														1					1
chr10	102894743	102895343	102895337	102895437	100	1	0	0																											3
chr10	102894743	102895343	102895339	102895414	75	1	0	0
									17	23	22	57	60	34	51	57	65	47	49	40	50	32	44	37	60	54	39	42	57	60	41	57	17	28	72	22	58	49	35	61	11	32	35	44	42	25	24	68	49
[truncated: 76 more columns]

## Sheet: CUHK_ZNF
chr	interval_start	interval_stop	methSeqStart	methSeqStop	methSeqLength	numU	numM	MD	HOT227	HOT197	CTR134	CTR111	HOT222	CTR129	HOT156	CTR86	HOT240	CTR153	CTR97	HOT236	CTR148	CTR132	HOT170	HOT215	CTR107	HOT164	CTR114	CTR152	CTR101	CTR84	HOT204	CTR151	CTR127	HOT198	CTR98	CTR128	CTR103	CTR113	HOT229	HOT205	CTR131	CTR117	CTR108	HOT233	HOT224	CTR110	HOT208	CTR147	HOT172
chr19	58220194	58220794	58220102	58220202	100	8	2	0.2											2
chr19	58220194	58220794	58220113	58220213	100	10	0	0								1
chr19	58220194	58220794	58220116	58220216	100	9	1	0.1											1
chr19	58220194	58220794	58220117	58220217	100	10	0	0																											3
chr19	58220194	58220794	58220121	58220196	75	5	2	0.285714
chr19	58220194	58220794	58220121	58220196	75	6	1	0.142857																				1
chr19	58220194	58220794	58220121	58220196	75	7	0	0
chr19	58220194	58220794	58220122	58220197	75	3	4	0.571429
chr19	58220194	58220794	58220122	58220197	75	7	0	0
chr19	58220194	58220794	58220123	58220198	75	0	6	1
chr19	58220194	58220794	58220123	58220198	75	4	2	0.333333
chr19	58220194	58220794	58220123	58220198	75	7	0	0
chr19	58220194	58220794	58220124	58220199	75	4	1	0.2
chr19	58220194	58220794	58220124	58220199	75	6	0	0
chr19	58220194	58220794	58220125	58220200	75	5	1	0.166667																1
chr19	58220194	58220794	58220126	58220201	75	5	0	0																										1
chr19	58220194	58220794	58220126	58220201	75	6	0	0			1
chr19	58220194	58220794	58220127	58220202	75	0	6	1																										1
chr19	58220194	58220794	58220127	58220202	75	5	0	0
chr19	58220194	58220794	58220127	58220202	75	5	1	0.166667
chr19	58220194	58220794	58220127	58220202	75	6	0	0																1																					1
chr19	58220194	58220794	58220128	58220203	75	5	0	0
chr19	58220194	58220794	58220128	58220203	75	5	1	0.166667
chr19	58220194	58220794	58220129	58220204	75	5	0	0															1								1
chr19	58220194	58220794	58220129	58220204	75	6	0	0
chr19	58220194	58220794	58220130	58220205	75	3	3	0.5
chr19	58220194	58220794	58220130	58220205	75	6	0	0					1																1					1											2			3
chr19	58220194	58220794	58220131	58220206	75	5	0	0
chr19	58220194	58220794	58220131	58220206	75	6	0	0
chr19	58220194	58220794	58220132	58220207	75	4	1	0.2																				1
chr19	58220194	58220794	58220132	58220207	75	5	0	0
chr19	58220194	58220794	58220132	58220207	75	6	0	0																	1																			1	2
chr19	58220194	58220794	58220133	58220208	75	0	5	1
chr19	58220194	58220794	58220133	58220208	75	3	2	0.4
chr19	58220194	58220794	58220133	58220208	75	4	0	0										1
chr19	58220194	58220794	58220133	58220208	75	5	0	0										1																			4		1		2					1			2
chr19	58220194	58220794	58220133	58220233	100	8	0	0								1
chr19	58220194	58220794	58220134	58220209	75	0	5	1																										1
chr19	58220194	58220794	58220134	58220209	75	1	4	0.8
chr19	58220194	58220794	58220134	58220209	75	4	0	0						2
chr19	58220194	58220794	58220134	58220209	75	4	1	0.2
chr19	58220194	58220794	58220134	58220209	75	5	0	0									1			1											2
chr19	58220194	58220794	58220134	58220209	75	6	0	0
chr19	58220194	58220794	58220134	58220234	100	7	1	0.125																						1
chr19	58220194	58220794	58220135	58220210	75	5	1	0.166667
chr19	58220194	58220794	58220135	58220210	75	6	0	0																																			3
chr19	58220194	58220794	58220136	58220211	75	1	5	0.833333
chr19	58220194	58220794	58220136	58220211	75	5	1	0.166667																				1
chr19	58220194	58220794	58220137	58220212	75	0	6	1
chr19	58220194	58220794	58220137	58220212	75	6	0	0
chr19	58220194	58220794	58220138	58220213	75	1	5	0.833333
chr19	58220194	58220794	58220138	58220213	75	5	0	0
chr19	58220194	58220794	58220138	58220213	75	6	0	0
chr19	58220194	58220794	58220139	58220214	75	6	0	0
chr19	58220194	58220794	58220140	58220215	75	2	4	0.666667																																1
chr19	58220194	58220794	58220140	58220215	75	6	0	0																				2
chr19	58220194	58220794	58220141	58220216	75	0	5	1
chr19	58220194	58220794	58220141	58220216	75	5	0	0
chr19	58220194	58220794	58220141	58220216	75	6	0	0							3
chr19	58220194	58220794	58220142	58220217	75	0	5	1
chr19	58220194	58220794	58220142	58220217	75	5	0	0																													4							2
chr19	58220194	58220794	58220143	58220218	75	5	0	0	1														1																					1
chr19	58220194	58220794	58220144	58220219	75	4	1	0.2																																				2
chr19	58220194	58220794	58220144	58220219	75	5	0	0				2																										1
chr19	58220194	58220794	58220144	58220244	100	8	0	0																						1
chr19	58220194	58220794	58220145	58220220	75	5	0	0																													2		1
chr19	58220194	58220794	58220146	58220221	75	0	5	1
chr19	58220194	58220794	58220146	58220221	75	4	0	0																																1
chr19	58220194	58220794	58220146	58220221	75	5	0	0					1																3				1
chr19	58220194	58220794	58220146	58220246	100	8	0	0
chr19	58220194	58220794	58220147	58220222	75	0	5	1
chr19	58220194	58220794	58220147	58220222	75	1	5	0.833333
chr19	58220194	58220794	58220147	58220222	75	5	0	0	1											2							1
chr19	58220194	58220794	58220147	58220222	75	6	0	0																												1				1
chr19	58220194	58220794	58220147	58220247	100	8	0	0								1
chr19	58220194	58220794	58220148	58220223	75	4	2	0.333333
chr19	58220194	58220794	58220148	58220223	75	6	0	0												1						1																			1
chr19	58220194	58220794	58220149	58220224	75	1	5	0.833333
chr19	58220194	58220794	58220149	58220224	75	4	2	0.333333
chr19	58220194	58220794	58220149	58220224	75	6	0	0		1																											5							2
chr19	58220194	58220794	58220149	58220249	100	8	0	0																						1
chr19	58220194	58220794	58220150	58220225	75	6	0	0					2					1						1		3														2				1
chr19	58220194	58220794	58220150	58220250	100	7	1	0.125																						1
chr19	58220194	58220794	58220150	58220250	100	8	0	0								2
chr19	58220194	58220794	58220151	58220226	75	5	1	0.166667																													2
chr19	58220194	58220794	58220152	58220227	75	5	1	0.166667																	1																		1
chr19	58220194	58220794	58220152	58220227	75	6	0	0							1													1
chr19	58220194	58220794	58220152	58220252	100	8	0	0																						1
chr19	58220194	58220794	58220153	58220199	46	4	0	0															1
chr19	58220194	58220794	58220153	58220228	75	5	1	0.166667																							1
chr19	58220194	58220794	58220154	58220229	75	6	0	0
chr19	58220194	58220794	58220155	58220204	49	4	0	0
chr19	58220194	58220794	58220155	58220230	75	5	2	0.285714
chr19	58220194	58220794	58220155	58220230	75	6	1	0.142857																													1
chr19	58220194	58220794	58220155	58220230	75	7	0	0							1					1	2			1								1					5								1		2		2
chr19	58220194	58220794	58220156	58220231	75	0	7	1																										1
chr19	58220194	58220794	58220156	58220231	75	6	0	0						2
chr19	58220194	58220794	58220156	58220231	75	7	0	0															1																	2						1
chr19	58220194	58220794	58220157	58220232	75	2	4	0.666667
chr19	58220194	58220794	58220157	58220232	75	3	3	0.5
chr19	58220194	58220794	58220157	58220232	75	6	0	0																																								1
chr19	58220194	58220794	58220157	58220257	100	7	0	0																											1
chr19	58220194	58220794	58220158	58220233	75	5	1	0.166667
chr19	58220194	58220794	58220158	58220233	75	6	0	0							1																								1
chr19	58220194	58220794	58220159	58220234	75	6	0	0																		1
chr19	58220194	58220794	58220159	58220259	100	6	0	0																											1
chr19	58220194	58220794	58220159	58220259	100	7	0	0																											1
chr19	58220194	58220794	58220160	58220235	75	6	0	0																		1
chr19	58220194	58220794	58220160	58220260	100	7	0	0								1
chr19	58220194	58220794	58220161	58220236	75	6	0	0
chr19	58220194	58220794	58220162	58220237	75	5	0	0
chr19	58220194	58220794	58220162	58220237	75	6	0	0										1			2			1								1													1
chr19	58220194	58220794	58220163	58220238	75	0	6	1
chr19	58220194	58220794	58220163	58220238	75	2	4	0.666667
chr19	58220194	58220794	58220163	58220238	75	5	0	0
chr19	58220194	58220794	58220163	58220238	75	5	1	0.166667
chr19	58220194	58220794	58220163	58220238	75	6	0	0
chr19	58220194	58220794	58220163	58220263	100	8	0	0											1
chr19	58220194	58220794	58220164	58220239	75	3	3	0.5
chr19	58220194	58220794	58220164	58220239	75	5	1	0.166667
chr19	58220194	58220794	58220165	58220240	75	0	6	1
chr19	58220194	58220794	58220165	58220240	75	3	3	0.5
chr19	58220194	58220794	58220165	58220240	75	5	1	0.166667
chr19	58220194	58220794	58220165	58220240	75	6	0	0																																					2
chr19	58220194	58220794	58220166	58220241	75	5	0	0
chr19	58220194	58220794	58220166	58220241	75	6	0	0																													3												1
chr19	58220194	58220794	58220167	58220242	75	6	0	0																															1
chr19	58220194	58220794	58220167	58220267	100	7	0	0								1
chr19	58220194	58220794	58220168	58220243	75	6	0	0		1											1		1																									1
chr19	58220194	58220794	58220169	58220226	57	4	0	0																											2
chr19	58220194	58220794	58220169	58220244	75	0	6	1
chr19	58220194	58220794	58220169	58220244	75	4	2	0.333333
chr19	58220194	58220794	58220169	58220244	75	6	0	0			1							1								2
chr19	58220194	58220794	58220170	58220245	75	0	6	1							1
chr19	58220194	58220794	58220170	58220245	75	2	4	0.666667
chr19	58220194	58220794	58220170	58220245	75	5	1	0.166667																																					1
chr19	58220194	58220794	58220170	58220245	75	6	0	0										1										1												1
chr19	58220194	58220794	58220171	58220246	75	5	0	0	1
chr19	58220194	58220794	58220171	58220246	75	5	1	0.166667
chr19	58220194	58220794	58220171	58220246	75	6	0	0			1
chr19	58220194	58220794	58220172	58220247	75	1	5	0.833333
chr19	58220194	58220794	58220172	58220247	75	5	1	0.166667
chr19	58220194	58220794	58220172	58220247	75	6	0	0
chr19	58220194	58220794	58220173	58220248	75	5	1	0.166667
chr19	58220194	58220794	58220173	58220248	75	6	0	0						1
chr19	58220194	58220794	58220174	58220227	53	4	0	0
chr19	58220194	58220794	58220174	58220249	75	1	5	0.833333
chr19	58220194	58220794	58220174	58220249	75	5	1	0.166667																																				3
chr19	58220194	58220794	58220174	58220249	75	6	0	0					1
chr19	58220194	58220794	58220175	58220250	75	6	0	0												1	1		1			2																		1	1			1
chr19	58220194	58220794	58220176	58220251	75	6	0	0
chr19	58220194	58220794	58220177	58220252	75	0	6	1
chr19	58220194	58220794	58220177	58220252	75	2	4	0.666667
chr19	58220194	58220794	58220177	58220252	75	6	0	0																			1										3							3
chr19	58220194	58220794	58220178	58220253	75	6	0	0						1																							3				2
chr19	58220194	58220794	58220179	58220254	75	0	6	1
chr19	58220194	58220794	58220179	58220254	75	6	0	0																																1
chr19	58220194	58220794	58220180	58220255	75	6	0	0																					1
chr19	58220194	58220794	58220181	58220256	75	0	6	1																										1
chr19	58220194	58220794	58220181	58220256	75	5	0	0																																									1
chr19	58220194	58220794	58220181	58220256	75	6	0	0																					1		1						1
chr19	58220194	58220794	58220182	58220257	75	0	6	1
chr19	58220194	58220794	58220182	58220257	75	5	0	0
chr19	58220194	58220794	58220182	58220257	75	6	0	0						1									1														2									1
chr19	58220194	58220794	58220183	58220258	75	3	3	0.5
chr19	58220194	58220794	58220183	58220258	75	5	0	0															1
chr19	58220194	58220794	58220183	58220258	75	6	0	0																				3													2
chr19	58220194	58220794	58220183	58220283	100	7	0	0								1			3																2
chr19	58220194	58220794	58220184	58220233	49	5	0	0																																		1
chr19	58220194	58220794	58220184	58220259	75	4	2	0.333333
chr19	58220194	58220794	58220184	58220259	75	5	0	0																								1
chr19	58220194	58220794	58220184	58220259	75	5	1	0.166667
chr19	58220194	58220794	58220184	58220259	75	6	0	0				2											1	1								1												1
chr19	58220194	58220794	58220185	58220260	75	6	0	0												1
chr19	58220194	58220794	58220186	58220245	59	6	0	0
chr19	58220194	58220794	58220186	58220261	75	5	0	0						1																							1
chr19	58220194	58220794	58220186	58220261	75	6	0	0										1																			5
chr19	58220194	58220794	58220187	58220262	75	5	2	0.285714
chr19	58220194	58220794	58220187	58220262	75	6	0	0																										1														3
chr19	58220194	58220794	58220187	58220262	75	7	0	0					1
chr19	58220194	58220794	58220188	58220263	75	0	7	1
chr19	58220194	58220794	58220188	58220263	75	7	0	0																		2						1
chr19	58220194	58220794	58220189	58220264	75	0	7	1
chr19	58220194	58220794	58220189	58220264	75	1	6	0.857143
chr19	58220194	58220794	58220189	58220264	75	3	4	0.571429
chr19	58220194	58220794	58220189	58220264	75	7	0	0					1
chr19	58220194	58220794	58220190	58220265	75	1	6	0.857143
chr19	58220194	58220794	58220190	58220265	75	6	1	0.142857																				1
chr19	58220194	58220794	58220190	58220265	75	7	0	0																	1									1
chr19	58220194	58220794	58220190	58220290	100	7	1	0.125																											2
chr19	58220194	58220794	58220191	58220266	75	0	7	1
chr19	58220194	58220794	58220191	58220266	75	6	0	0
chr19	58220194	58220794	58220191	58220266	75	7	0	0
chr19	58220194	58220794	58220192	58220225	33	3	0	0																																								1
chr19	58220194	58220794	58220192	58220267	75	6	0	0										1																			4	5										3	1
chr19	58220194	58220794	58220193	58220268	75	3	3	0.5
chr19	58220194	58220794	58220193	58220268	75	6	0	0																																						3
chr19	58220194	58220794	58220194	58220269	75	1	5	0.833333
chr19	58220194	58220794	58220194	58220294	100	7	0	0																						1
chr19	58220194	58220794	58220195	58220270	75	0	5	1
chr19	58220194	58220794	58220195	58220270	75	2	3	0.6
chr19	58220194	58220794	58220195	58220270	75	6	0	0
chr19	58220194	58220794	58220196	58220271	75	0	5	1
chr19	58220194	58220794	58220196	58220271	75	3	1	0.25
chr19	58220194	58220794	58220196	58220271	75	4	0	0
chr19	58220194	58220794	58220196	58220271	75	4	1	0.2
chr19	58220194	58220794	58220196	58220271	75	5	0	0																		2		1																					1
chr19	58220194	58220794	58220196	58220296	100	6	1	0.142857																											2
chr19	58220194	58220794	58220197	58220272	75	4	0	0		1																																							1
chr19	58220194	58220794	58220197	58220272	75	5	0	0																					1
chr19	58220194	58220794	58220198	58220231	33	3	0	0
chr19	58220194	58220794	58220198	58220273	75	4	0	0					1
chr19	58220194	58220794	58220198	58220273	75	5	0	0																1																		1
chr19	58220194	58220794	58220199	58220257	58	4	0	0																										2
chr19	58220194	58220794	58220199	58220274	75	5	0	0
chr19	58220194	58220794	58220200	58220275	75	3	2	0.4
chr19	58220194	58220794	58220200	58220275	75	4	1	0.2
chr19	58220194	58220794	58220201	58220276	75	4	1	0.2
chr19	58220194	58220794	58220202	58220277	75	5	0	0
chr19	58220194	58220794	58220203	58220278	75	2	3	0.6
chr19	58220194	58220794	58220203	58220278	75	5	0	0																							1
chr19	58220194	58220794	58220203	58220303	100	8	0	0																											1
chr19	58220194	58220794	58220204	58220279	75	5	0	0																		1
chr19	58220194	58220794	58220204	58220304	100	8	0	0																						1
chr19	58220194	58220794	58220205	58220255	50	3	1	0.25
chr19	58220194	58220794	58220205	58220267	62	5	0	0																									2
chr19	58220194	58220794	58220205	58220280	75	0	5	1																										3
chr19	58220194	58220794	58220205	58220280	75	5	0	0	1								2	1																			2		1				1	1				1
chr19	58220194	58220794	58220205	58220305	100	8	0	0																						1
chr19	58220194	58220794	58220206	58220247	41	4	0	0																				1
chr19	58220194	58220794	58220206	58220281	75	4	1	0.2																					3
chr19	58220194	58220794	58220206	58220281	75	5	0	0					1									1					1										2	1								1
chr19	58220194	58220794	58220207	58220282	75	1	4	0.8
chr19	58220194	58220794	58220207	58220282	75	4	0	0																													1
chr19	58220194	58220794	58220207	58220282	75	5	0	0																		5													1			2
chr19	58220194	58220794	58220207	58220307	100	8	0	0																						1					2
chr19	58220194	58220794	58220208	58220283	75	0	5	1
chr19	58220194	58220794	58220208	58220283	75	5	0	0
chr19	58220194	58220794	58220208	58220308	100	8	0	0								1
chr19	58220194	58220794	58220209	58220284	75	1	3	0.75
chr19	58220194	58220794	58220209	58220284	75	2	2	0.5
chr19	58220194	58220794	58220209	58220284	75	4	0	0																										1
chr19	58220194	58220794	58220210	58220285	75	4	0	0												1
chr19	58220194	58220794	58220211	58220286	75	4	0	0																	2																						1
chr19	58220194	58220794	58220212	58220287	75	0	4	1																										1
chr19	58220194	58220794	58220212	58220287	75	4	0	0
chr19	58220194	58220794	58220213	58220288	75	1	4	0.8
chr19	58220194	58220794	58220213	58220288	75	4	0	0																																								1
chr19	58220194	58220794	58220213	58220288	75	5	0	0					2													3								1
chr19	58220194	58220794	58220213	58220313	100	7	0	0								1
chr19	58220194	58220794	58220214	58220289	75	5	0	0													1																										1	2
chr19	58220194	58220794	58220214	58220314	100	7	0	0								1
chr19	58220194	58220794	58220215	58220290	75	4	1	0.2
chr19	58220194	58220794	58220215	58220290	75	5	0	0																		1
chr19	58220194	58220794	58220216	58220291	75	5	0	0		2
chr19	58220194	58220794	58220216	58220316	100	7	0	0											1
chr19	58220194	58220794	58220217	58220277	60	3	0	0
chr19	58220194	58220794	58220217	58220292	75	5	0	0
chr19	58220194	58220794	58220218	58220293	75	3	2	0.4
chr19	58220194	58220794	58220218	58220293	75	5	0	0
chr19	58220194	58220794	58220219	58220294	75	4	1	0.2
chr19	58220194	58220794	58220219	58220319	100	8	0	0																						3
chr19	58220194	58220794	58220220	58220295	75	3	1	0.25																					1
chr19	58220194	58220794	58220220	58220295	75	4	1	0.2									1												4
chr19	58220194	58220794	58220220	58220295	75	5	0	0																																						1
chr19	58220194	58220794	58220220	58220320	100	8	0	0																											1
chr19	58220194	58220794	58220221	58220296	75	6	0	0
chr19	58220194	58220794	58220222	58220297	75	0	5	1
chr19	58220194	58220794	58220222	58220297	75	4	0	0
chr19	58220194	58220794	58220222	58220297	75	5	0	0																																1
chr19	58220194	58220794	58220223	58220298	75	5	0	0															1
chr19	58220194	58220794	58220224	58220299	75	6	0	0						1
chr19	58220194	58220794	58220225	58220300	75	3	2	0.4									1
chr19	58220194	58220794	58220225	58220300	75	6	0	0																				3
chr19	58220194	58220794	58220226	58220301	75	2	4	0.666667
chr19	58220194	58220794	58220226	58220301	75	6	0	0
chr19	58220194	58220794	58220227	58220302	75	0	6	1
[truncated: 1,549 more rows]
[truncated: 76 more columns]

## Sheet: CUHK_GALR1
chr	interval_start	interval_stop	methSeqStart	methSeqStop	methSeqLength	numU	numM	MD	HOT227	HOT197	CTR134	CTR111	HOT222	CTR129	HOT156	CTR86	HOT240	CTR153	CTR97	HOT236	CTR148	CTR132	HOT170	HOT215	CTR107	HOT164	CTR114	CTR152	CTR101	CTR84	HOT204	CTR151	CTR127	HOT198	CTR98	CTR128	CTR103	CTR113	HOT229	HOT205	CTR131	CTR117	CTR108	HOT233	HOT224	CTR110	HOT208	CTR147	HOT172
[truncated: 1,754 more rows]
[truncated: 76 more columns]
